# Supplementary material for: Heterogeneity of proteome dynamics between connective tissue phases of adult tendon
Source: eLife. 2020 May 12;9:e55262. doi: 10.7554/eLife.55262 (PMC7217697; doi:10.7554/eLife.55262)
Supplement: Figure 1—source data 1. [file elife-55262-fig1-data1.xlsx]

## Sheet: Sheet1
Sample		Intensity m/z 58	Intensity m/z 59	59/58
Calibration (% D2O)
0		8038	534	0.0664344
2.5		9312	2172	0.233247
5		7472	3083	0.412607
7.5		6978	3794	0.543709
10		5853	3979	0.679822
Rat serum samples	Day
1: Day 1	1	5052	1391	0.275337
2: Day 1	1	7647	2312	0.302341
3: Day 1	1	5821	1660	0.285174
4: Day 3	3	6246	2189	0.350464
5: Day 3	3	5060	1887	0.372925
6: Day 3	3	7672	2700	0.351929
7: Day 6	6	5155	2059	0.399418
8: Day 6	6	2187	776	0.354824
9: Day 6	6	7554	3695	0.489145
10: Day 15	15	9250	4181	0.452
11: Day 15	15	5826	2428	0.416752
12: Day 15	15	4135	1791	0.433132
13: Day 31	31	9286	4616	0.497092
14: Day 31	31	6548	2794	0.426695
15: Day 31	31	1620	576	0.355556
16: Day 63	63	10103	4791	0.474216
17: Day 63	63	4440	1761	0.396622
18: Day63	63	5541	2185	0.394333
19: Day 127	127	3323	1448	0.435751
20: Day 127	127	7232	3053	0.422152
21: Day 127	127	3948	1722	0.43617
22: Control	0	8149	493	0.0604982
23: Control	0	8918	564	0.0632429
24: Control	0	5731	342	0.0596754
