# Supplementary material for: Heterogeneity of proteome dynamics between connective tissue phases of adult tendon
Source: eLife. 2020 May 12;9:e55262. doi: 10.7554/eLife.55262 (PMC7217697; doi:10.7554/eLife.55262)
Supplement: Figure 2—source data 1. [file elife-55262-fig2-data1.xlsx]

## Sheet: protein_annotations_Tend
Gene name	identifier	domain_summary_url	annotation
Tubb5	10116.ENSRNOP00000001095	https://smart.embl.de/smart/DDvec.cgi?smart=444:Tubulin(47|244)+Tubulin_C(246|383)+COIL(405|436)+	Tubulin beta-5 chain
Rplp0	10116.ENSRNOP00000001518	https://smart.embl.de/smart/DDvec.cgi?smart=317:Pfam_Ribosomal_L10(5|106)+Pfam_Ribosomal_60s(231|316)+	60S acidic ribosomal protein P0
Pcolce	10116.ENSRNOP00000001887	https://smart.embl.de/smart/DDvec.cgi?smart=468:SIGNAL(1|24)+CUB(36|148)+CUB(158|272)+C345C(352|458)+	Procollagen C-endopeptidase enhancer 1
Gnb2	10116.ENSRNOP00000001911	https://smart.embl.de/smart/DDvec.cgi?smart=340:COIL(1|30)+WD40(44|83)+WD40(86|125)+WD40(132|170)+WD40(173|212)+WD40(215|254)+WD40(257|298)+WD40(301|340)+	Guanine nucleotide-binding protein G(I)/G(S)/G(T) subunit beta-2
Ywhag	10116.ENSRNOP00000001954	https://smart.embl.de/smart/DDvec.cgi?smart=247:14_3_3(4|247)+	14-3-3 protein gamma
Mdh2	10116.ENSRNOP00000001958	https://smart.embl.de/smart/DDvec.cgi?smart=338:Pfam_Ldh_1_N(25|168)+Pfam_Ldh_1_C(170|334)+	Malate dehydrogenase 2, NAD (mitochondrial)
Atp5o	10116.ENSRNOP00000002732	https://smart.embl.de/smart/DDvec.cgi?smart=213:Pfam_OSCP(37|209)+	ATP synthase subunit O, mitochondrial
Pgk1	10116.ENSRNOP00000003390	https://smart.embl.de/smart/DDvec.cgi?smart=417:Pfam_PGK(9|406)+	Phosphoglycerate kinase 1
Alb	10116.ENSRNOP00000003921	https://smart.embl.de/smart/DDvec.cgi?smart=608:SIGNAL(1|18)+ALBUMIN(20|205)+ALBUMIN(212|397)+ALBUMIN(404|595)+	Serum albumin
Atp5b	10116.ENSRNOP00000003965	https://smart.embl.de/smart/DDvec.cgi?smart=529:Pfam_ATP-synt_ab_N(63|129)+AAA(198|382)+	ATP synthase subunit beta, mitochondrial
Calr	10116.ENSRNOP00000004091	https://smart.embl.de/smart/DDvec.cgi?smart=416:SIGNAL(1|17)+Pfam_Calreticulin(23|259)+Pfam_Calreticulin(257|332)+COIL(348|415)+	Calreticulin
Myh3	10116.ENSRNOP00000004147	https://smart.embl.de/smart/DDvec.cgi?smart=1940:Pfam_Myosin_N(35|74)+MYSc(80|780)+IQ(781|803)+IQ(807|829)+Pfam_Myosin_tail_1(844|1925)+	Myosin-3
Prelp	10116.ENSRNOP00000004241	https://smart.embl.de/smart/DDvec.cgi?smart=377:SIGNAL(1|21)+LRRNT(67|101)+LRR(97|119)+LRR(121|143)+LRR(144|167)+LRR(168|188)+LRR(189|214)+LRR(215|238)+LRR(240|259)+LRR(285|308)+	Prolargin
Fmod	10116.ENSRNOP00000004382	https://smart.embl.de/smart/DDvec.cgi?smart=376:SIGNAL(1|18)+LRRNT(75|109)+LRR(105|127)+LRR(154|177)+LRR(178|198)+LRR(199|221)+LRR_TYP(222|245)+LRR(246|266)+LRR(293|314)+LRR(342|367)+	Fibromodulin
Myoc	10116.ENSRNOP00000004386	https://smart.embl.de/smart/DDvec.cgi?smart=502:SIGNAL(1|31)+COIL(110|182)+OLF(244|501)+	Myocilin
Chad	10116.ENSRNOP00000004435	https://smart.embl.de/smart/DDvec.cgi?smart=358:SIGNAL(1|20)+LRRNT(21|54)+LRR_TYP(73|96)+LRR_TYP(97|120)+LRR_TYP(121|144)+LRR_TYP(145|168)+LRR(170|192)+LRR(193|216)+LRR_TYP(217|240)+LRR(245|265)+LRR(266|289)+LRRCT(299|346)+	Chondroadherin
Mid1	10116.ENSRNOP00000004873	https://smart.embl.de/smart/DDvec.cgi?smart=667:RING(10|59)+BBOX(114|164)+BBOX(170|212)+BBC(219|345)+FN3(382|472)+PRY(483|528)+SPRY(538|657)+	E3 ubiquitin-protein ligase Midline-1
Lrrc59	10116.ENSRNOP00000004941	https://smart.embl.de/smart/DDvec.cgi?smart=307:LRR(38|60)+LRR(61|83)+LRR(84|106)+LRR(107|131)+COIL(148|216)+TRANS(244|266)+	Leucine-rich repeat-containing protein 59
Col3a1	10116.ENSRNOP00000004956	https://smart.embl.de/smart/DDvec.cgi?smart=1463:SIGNAL(1|23)+VWC(33|89)+Pfam_Collagen(344|412)+Pfam_Collagen(1076|1135)+Pfam_Collagen(1136|1195)+COLFI(1228|1463)+	Collagen alpha-1(III) chain
Prdx4	10116.ENSRNOP00000005014	https://smart.embl.de/smart/DDvec.cgi?smart=273:SIGNAL(1|36)+Pfam_AhpC-TSA(83|216)+Pfam_1-cysPrx_C(236|269)+	Peroxiredoxin-4
Tnmd	10116.ENSRNOP00000005214	https://smart.embl.de/smart/DDvec.cgi?smart=317:TRANS(31|50)+BRICHOS(93|186)+	Tenomodulin
Krt14	10116.ENSRNOP00000005285	https://smart.embl.de/smart/DDvec.cgi?smart=485:Filament(121|432)+	Keratin, type I cytoskeletal 14
Col1a1	10116.ENSRNOP00000005311	https://smart.embl.de/smart/DDvec.cgi?smart=1453:SIGNAL(1|22)+VWC(31|86)+Pfam_Collagen(98|154)+Pfam_Collagen(166|227)+Pfam_Collagen(225|284)+Pfam_Collagen(285|344)+Pfam_Collagen(335|404)+Pfam_Collagen(465|524)+Pfam_Collagen(705|779)+Pfam_Collagen(822|887)+Pfam_Collagen(1068|1127)+Pfam_Collagen(1122|1184)+COLFI(1217|1453)+	Collagen alpha-1(I) chain
Krt17	10116.ENSRNOP00000005382	https://smart.embl.de/smart/DDvec.cgi?smart=433:Filament(83|394)+	Keratin, type I cytoskeletal 17
Eno3	10116.ENSRNOP00000005612	https://smart.embl.de/smart/DDvec.cgi?smart=434:Enolase_N(3|134)+Enolase_C(142|431)+	Beta-enolase
Cltc	10116.ENSRNOP00000005987	https://smart.embl.de/smart/DDvec.cgi?smart=1675:Pfam_Clathrin_propel(19|56)+Pfam_Clathrin_propel(148|187)+Pfam_Clathrin_propel(198|234)+Pfam_Clathrin_propel(253|288)+Pfam_Clathrin_propel(296|330)+Pfam_Clathrin-link(331|354)+Pfam_Clathrin_H_link(356|421)+CLH(537|679)+CLH(686|828)+CLH(833|972)+CLH(979|1124)+CLH(1128|1269)+CLH(1274|1420)+CLH(1423|1582)+	Clathrin heavy chain 1
Dcn	10116.ENSRNOP00000006070	https://smart.embl.de/smart/DDvec.cgi?smart=354:SIGNAL(1|16)+LRRNT(48|80)+LRR(79|98)+LRR(99|122)+LRR_TYP(123|146)+LRR(147|167)+LRR(194|217)+LRR(239|262)+LRR(263|286)+	Decorin
Lum	10116.ENSRNOP00000006109	https://smart.embl.de/smart/DDvec.cgi?smart=338:SIGNAL(1|18)+LRRNT(36|70)+LRR(66|88)+LRR(89|114)+LRR(135|157)+LRR(158|181)+LRR_TYP(183|206)+LRR(207|227)+LRR(228|253)+LRR(254|275)+LRR(303|328)+	Lumican
A1bg	10116.ENSRNOP00000006273	https://smart.embl.de/smart/DDvec.cgi?smart=513:SIGNAL(1|20)+IG_like(34|109)+Pfam_Ig_2(223|314)+IG(328|415)+IG_like(426|511)+	Alpha-1B-glycoprotein
Tuba1a	10116.ENSRNOP00000006322	https://smart.embl.de/smart/DDvec.cgi?smart=451:Tubulin(49|246)+Tubulin_C(248|393)+	Tubulin alpha-1A chain
Fbln5	10116.ENSRNOP00000007004	https://smart.embl.de/smart/DDvec.cgi?smart=448:SIGNAL(1|23)+EGF_like(42|86)+EGF_CA(127|167)+EGF_CA(168|206)+EGF_CA(207|246)+EGF_CA(247|287)+EGF_like(288|333)+	Fibulin-5
Ywhae	10116.ENSRNOP00000007100	https://smart.embl.de/smart/DDvec.cgi?smart=255:14_3_3(4|245)+	14-3-3 protein epsilon
Vdac1	10116.ENSRNOP00000008477	https://smart.embl.de/smart/DDvec.cgi?smart=283:Pfam_Porin_3(3|276)+	Voltage-dependent anion-selective channel protein 1
Pygl	10116.ENSRNOP00000009183	https://smart.embl.de/smart/DDvec.cgi?smart=850:Pfam_Phosphorylase(113|828)+	Glycogen phosphorylase, liver form
Cav1	10116.ENSRNOP00000009253	https://smart.embl.de/smart/DDvec.cgi?smart=178:Pfam_Caveolin(42|175)+	Caveolin-1
Casq1	10116.ENSRNOP00000009344	https://smart.embl.de/smart/DDvec.cgi?smart=406:Pfam_Thioredoxin_6(186|379)+	Calsequestrin-1
Rpl7	10116.ENSRNOP00000009431	https://smart.embl.de/smart/DDvec.cgi?smart=260:Pfam_Ribosomal_L30_N(26|97)+Pfam_Ribosomal_L30(102|152)+	60S ribosomal protein L7
Pzp	10116.ENSRNOP00000009467	https://smart.embl.de/smart/DDvec.cgi?smart=1500:SIGNAL(1|24)+Pfam_A2M_N(126|219)+A2M_N_2(458|606)+A2M(752|842)+Pfam_Thiol-ester_cl(975|1004)+Pfam_A2M_comp(1024|1289)+A2M_recep(1400|1487)+	Alpha-1-macroglobulin
Hsp90aa1	10116.ENSRNOP00000009556	https://smart.embl.de/smart/DDvec.cgi?smart=733:HATPase_c(40|194)+Pfam_HSP90(196|724)+	Heat shock protein HSP 90-alpha
Pygb	10116.ENSRNOP00000010158	https://smart.embl.de/smart/DDvec.cgi?smart=843:Pfam_Phosphorylase(113|828)+	Glycogen phosphorylase, brain form
Col27a1	10116.ENSRNOP00000010333	https://smart.embl.de/smart/DDvec.cgi?smart=1855:TSPN(52|232)+Pfam_Collagen(618|679)+Pfam_Collagen(676|741)+Pfam_Collagen(892|969)+Pfam_Collagen(1273|1333)+Pfam_Collagen(1332|1393)+Pfam_Collagen(1553|1615)+COLFI(1654|1855)+	Collagen alpha-1(XXVII) chain
Tmed10	10116.ENSRNOP00000010512	https://smart.embl.de/smart/DDvec.cgi?smart=219:EMP24_GP25L(31|213)+	Transmembrane emp24 domain-containing protein 10
Rpl15	10116.ENSRNOP00000010759	https://smart.embl.de/smart/DDvec.cgi?smart=204:Ribosomal_L15e(2|193)+	Ribosomal protein L15
Ptgis	10116.ENSRNOP00000010891	https://smart.embl.de/smart/DDvec.cgi?smart=450:Pfam_p450(194|444)+	Prostacyclin synthase
Ywhaq	10116.ENSRNOP00000011501	https://smart.embl.de/smart/DDvec.cgi?smart=245:14_3_3(3|242)+	14-3-3 protein theta
Acta2	10116.ENSRNOP00000011773	https://smart.embl.de/smart/DDvec.cgi?smart=377:ACTIN(7|377)+	Actin, alpha cardiac muscle 1
Col5a1	10116.ENSRNOP00000012334	https://smart.embl.de/smart/DDvec.cgi?smart=1636:Pfam_Collagen(353|413)+Pfam_Collagen(434|510)+Pfam_Collagen(530|595)+Pfam_Collagen(605|663)+Pfam_Collagen(1262|1339)+COLFI(1406|1635)+	Collagen alpha-1(V) chain
Tf	10116.ENSRNOP00000012725	https://smart.embl.de/smart/DDvec.cgi?smart=979:SIGNAL(1|19)+TR_FER(25|338)+TR_FER(346|673)+Pfam_SRPRB(770|949)+	Serotransferrin
Cyb5r3	10116.ENSRNOP00000012878	https://smart.embl.de/smart/DDvec.cgi?smart=307:Pfam_FAD_binding_6(50|157)+Pfam_NAD_binding_1(183|291)+	NADH-cytochrome b5 reductase 3
Dpysl2	10116.ENSRNOP00000012996	https://smart.embl.de/smart/DDvec.cgi?smart=572:Pfam_Amidohydro_1(64|453)+	Dihydropyrimidinase-related protein 2
Lgals1	10116.ENSRNOP00000013538	https://smart.embl.de/smart/DDvec.cgi?smart=135:Gal-bind_lectin(8|134)+	Galectin-1
Pnp	10116.ENSRNOP00000013582	https://smart.embl.de/smart/DDvec.cgi?smart=288:Pfam_PNP_UDP_1(25|279)+	Purine nucleoside phosphorylase
Eef1a1	10116.ENSRNOP00000013608	https://smart.embl.de/smart/DDvec.cgi?smart=462:Pfam_GTP_EFTU(5|238)+Pfam_GTP_EFTU_D2(260|327)+Pfam_GTP_EFTU_D3(333|442)+	Elongation factor 1-alpha 1
Glud1	10116.ENSRNOP00000013789	https://smart.embl.de/smart/DDvec.cgi?smart=558:Pfam_ELFV_dehydrog_N(112|242)+ELFV_dehydrog(265|554)+	Glutamate dehydrogenase 1, mitochondrial
Tubb4b	10116.ENSRNOP00000013863	https://smart.embl.de/smart/DDvec.cgi?smart=445:Tubulin(47|244)+Tubulin_C(246|383)+COIL(405|442)+	Tubulin beta-4B chain
H2afz	10116.ENSRNOP00000013919	https://smart.embl.de/smart/DDvec.cgi?smart=127:H2A(4|124)+	Histone H2A.Z
Car3	10116.ENSRNOP00000014177	https://smart.embl.de/smart/DDvec.cgi?smart=260:Carb_anhydrase(5|259)+	Carbonic anhydrase 3
Acsl1	10116.ENSRNOP00000014235	https://smart.embl.de/smart/DDvec.cgi?smart=699:TRANS(21|43)+Pfam_AMP-binding(97|564)+	Long-chain-fatty-acid--CoA ligase 1
Anxa6	10116.ENSRNOP00000014464	https://smart.embl.de/smart/DDvec.cgi?smart=671:ANX(37|89)+ANX(109|161)+ANX(193|245)+ANX(268|320)+ANX(380|432)+ANX(452|504)+ANX(539|591)+ANX(614|666)+	Annexin A6
Gnb4	10116.ENSRNOP00000014871	https://smart.embl.de/smart/DDvec.cgi?smart=337:COIL(1|32)+WD40(83|122)+WD40(129|167)+WD40(170|209)+WD40(212|251)+WD40(254|295)+WD40(298|337)+	Guanine nucleotide-binding protein subunit beta-4
Nt5e	10116.ENSRNOP00000015057	https://smart.embl.de/smart/DDvec.cgi?smart=576:SIGNAL(1|28)+Pfam_Metallophos(31|249)+Pfam_5_nucleotid_C(340|515)+TRANS(553|575)+	5'-nucleotidase
Ckb	10116.ENSRNOP00000015122	https://smart.embl.de/smart/DDvec.cgi?smart=381:Pfam_ATP-gua_PtransN(24|94)+Pfam_ATP-gua_Ptrans(153|367)+	Creatine kinase B-type
ENSRNOG00000011355	10116.ENSRNOP00000015234	https://smart.embl.de/smart/DDvec.cgi?smart=194:Ribosomal_S4(3|107)+S4(108|179)+	40S ribosomal protein S9-like
Pkm	10116.ENSRNOP00000015331	https://smart.embl.de/smart/DDvec.cgi?smart=531:Pfam_PK(42|395)+Pfam_PK_C(410|528)+	Pyruvate kinase PKM
S100a6	10116.ENSRNOP00000015612	https://smart.embl.de/smart/DDvec.cgi?smart=89:Pfam_EF-hand_7(23|78)+	Protein S100-A6
Slc25a5	10116.ENSRNOP00000015913	https://smart.embl.de/smart/DDvec.cgi?smart=298:Pfam_Mito_carr(4|103)+Pfam_Mito_carr(109|206)+Pfam_Mito_carr(205|298)+	ADP/ATP translocase 2
S100a4	10116.ENSRNOP00000015958	https://smart.embl.de/smart/DDvec.cgi?smart=101:Pfam_EF-hand_7(23|80)+	S100 calcium-binding protein A4
Col2a1	10116.ENSRNOP00000016044	https://smart.embl.de/smart/DDvec.cgi?smart=1419:SIGNAL(1|25)+Pfam_Collagen(172|249)+Pfam_Collagen(358|429)+Pfam_Collagen(1087|1149)+COLFI(1184|1419)+	Collagen alpha-1(II) chain
Eef1a2	10116.ENSRNOP00000016947	https://smart.embl.de/smart/DDvec.cgi?smart=463:Pfam_GTP_EFTU(5|238)+Pfam_GTP_EFTU_D2(260|327)+Pfam_GTP_EFTU_D3(333|442)+	Elongation factor 1-alpha 2
Ywhab	10116.ENSRNOP00000016981	https://smart.embl.de/smart/DDvec.cgi?smart=246:14_3_3(5|244)+	14-3-3 protein beta/alpha
Ehd2	10116.ENSRNOP00000017353	https://smart.embl.de/smart/DDvec.cgi?smart=543:Pfam_EHD_N(24|56)+Pfam_Dynamin_N(61|221)+EH(443|536)+	EH domain-containing protein 2
Ldha	10116.ENSRNOP00000017468	https://smart.embl.de/smart/DDvec.cgi?smart=332:Pfam_Ldh_1_N(21|160)+Pfam_Ldh_1_C(163|331)+	Lactate dehydrogenase A
Myl1	10116.ENSRNOP00000017838	https://smart.embl.de/smart/DDvec.cgi?smart=189:EFh(49|77)+EFh(126|154)+	Myosin light chain 1/3, skeletal muscle isoform
Vdac2	10116.ENSRNOP00000018462	https://smart.embl.de/smart/DDvec.cgi?smart=295:Pfam_Porin_3(15|288)+	Voltage-dependent anion-selective channel protein 2
Krt15	10116.ENSRNOP00000019037	https://smart.embl.de/smart/DDvec.cgi?smart=447:Filament(93|405)+	Keratin, type I cytoskeletal 15
Krt19	10116.ENSRNOP00000019133	https://smart.embl.de/smart/DDvec.cgi?smart=403:Filament(82|393)+	Keratin, type I cytoskeletal 19
Lmnb1	10116.ENSRNOP00000019351	https://smart.embl.de/smart/DDvec.cgi?smart=587:Filament(31|387)+Pfam_LTD(435|545)+	Lamin-B1
Anxa5	10116.ENSRNOP00000019552	https://smart.embl.de/smart/DDvec.cgi?smart=319:ANX(30|82)+ANX(102|154)+ANX(186|238)+ANX(261|313)+	Annexin A5
Fn1	10116.ENSRNOP00000019772	https://smart.embl.de/smart/DDvec.cgi?smart=1913:FN1(1|21)+FN1(22|65)+FN3(70|151)+FN3(180|259)+FN3(271|349)+FN3(367|446)+FN3(457|535)+FN3(547|621)+FN3(634|716)+FN3(725|807)+FN3(818|898)+FN3(909|988)+FN3(999|1078)+FN3(1093|1172)+FN3(1183|1262)+FN3(1273|1352)+FN3(1365|1444)+FN3(1454|1535)+FN3(1629|1708)+FN1(1732|1776)+FN1(1777|1819)+FN1(1821|1861)+	Fibronectin
Pdia3	10116.ENSRNOP00000020478	https://smart.embl.de/smart/DDvec.cgi?smart=505:SIGNAL(1|24)+Pfam_Thioredoxin(26|131)+Pfam_Thioredoxin_6(160|355)+Pfam_Thioredoxin(377|483)+	Protein disulfide-isomerase A3
Tuba1c	10116.ENSRNOP00000020932	https://smart.embl.de/smart/DDvec.cgi?smart=449:Tubulin(49|246)+Tubulin_C(248|393)+COIL(414|441)+	Tubulin alpha-1C chain
Tpm4	10116.ENSRNOP00000021073	https://smart.embl.de/smart/DDvec.cgi?smart=248:Pfam_Tropomyosin(12|248)+	Tropomyosin alpha-4 chain
Sfxn3	10116.ENSRNOP00000021171	https://smart.embl.de/smart/DDvec.cgi?smart=321:Pfam_Mtc(15|321)+	Sideroflexin-3
ENSRNOG00000016220	10116.ENSRNOP00000021725	https://smart.embl.de/smart/DDvec.cgi?smart=165:RL11(13|144)+	Ribosomal protein L12
Clu	10116.ENSRNOP00000022095	https://smart.embl.de/smart/DDvec.cgi?smart=447:SIGNAL(1|21)+CLb(22|226)+CLa(227|441)+	Clusterin
Mbp	10116.ENSRNOP00000022303	https://smart.embl.de/smart/DDvec.cgi?smart=195:Pfam_Myelin_MBP(16|195)+	Myelin basic protein
Cam	10116.ENSRNOP00000022603	https://smart.embl.de/smart/DDvec.cgi?smart=149:EFh(12|40)+EFh(48|76)+EFh(85|113)+EFh(121|149)+	Calmodulin 1
Tpm2	10116.ENSRNOP00000022801	https://smart.embl.de/smart/DDvec.cgi?smart=284:Pfam_Tropomyosin_1(7|153)+	Tropomyosin beta chain
Ppib	10116.ENSRNOP00000022828	https://smart.embl.de/smart/DDvec.cgi?smart=216:TRANS(11|33)+Pfam_Pro_isomerase(47|204)+	Peptidyl-prolyl cis-trans isomerase B
Atp5a1	10116.ENSRNOP00000022892	https://smart.embl.de/smart/DDvec.cgi?smart=553:Pfam_ATP-synt_ab_N(67|135)+Pfam_ATP-synt_ab(192|415)+Pfam_ATP-synt_ab_C(422|547)+	ATP synthase subunit alpha, mitochondrial
Ckm	10116.ENSRNOP00000022895	https://smart.embl.de/smart/DDvec.cgi?smart=381:Pfam_ATP-gua_PtransN(24|94)+Pfam_ATP-gua_Ptrans(153|367)+	Creatine kinase M-type
Serpinh1	10116.ENSRNOP00000022983	https://smart.embl.de/smart/DDvec.cgi?smart=417:SIGNAL(1|17)+SERPIN(51|408)+	Serpin H1
Hist1h1a	10116.ENSRNOP00000023054	https://smart.embl.de/smart/DDvec.cgi?smart=214:H15(36|101)+	Histone H1.1
Prdx1	10116.ENSRNOP00000023132	https://smart.embl.de/smart/DDvec.cgi?smart=199:Pfam_AhpC-TSA(8|142)+Pfam_1-cysPrx_C(162|197)+	Peroxiredoxin-1
Plg	10116.ENSRNOP00000023370	https://smart.embl.de/smart/DDvec.cgi?smart=812:SIGNAL(1|19)+PAN_AP(20|97)+KR(101|183)+KR(184|264)+KR(273|354)+KR(374|456)+KR(479|562)+Tryp_SPc(581|805)+	Plasminogen
Tubb3	10116.ENSRNOP00000023452	https://smart.embl.de/smart/DDvec.cgi?smart=450:Tubulin(47|244)+Tubulin_C(246|383)+COIL(405|436)+	Tubulin beta-3 chain
Tpm5	10116.ENSRNOP00000023567	https://smart.embl.de/smart/DDvec.cgi?smart=248:Pfam_Tropomyosin(12|248)+	Tropomyosin alpha-3 chain
Tubb2b	10116.ENSRNOP00000023582	https://smart.embl.de/smart/DDvec.cgi?smart=445:Tubulin(47|244)+Tubulin_C(246|383)+COIL(405|440)+	Tubulin beta-2B chain
Tubb2a	10116.ENSRNOP00000023611	https://smart.embl.de/smart/DDvec.cgi?smart=445:Tubulin(47|244)+Tubulin_C(246|383)+COIL(405|440)+	Tubulin beta-2A chain
Anxa1	10116.ENSRNOP00000023664	https://smart.embl.de/smart/DDvec.cgi?smart=346:ANX(59|111)+ANX(131|183)+ANX(215|267)+ANX(290|342)+	Annexin A1
Col11a1	10116.ENSRNOP00000023794	https://smart.embl.de/smart/DDvec.cgi?smart=1816:TSPN(37|228)+Pfam_Collagen(445|503)+Pfam_Collagen(583|653)+Pfam_Collagen(751|817)+Pfam_Collagen(986|1053)+Pfam_Collagen(1493|1555)+COLFI(1586|1815)+	Collagen alpha-1(XI) chain
Bgn	10116.ENSRNOP00000023920	https://smart.embl.de/smart/DDvec.cgi?smart=369:SIGNAL(1|16)+LRRNT(63|95)+LRR(94|113)+LRR(114|137)+LRR(138|161)+LRR(162|182)+LRR(228|253)+LRR(254|276)+LRR(277|299)+LRR(300|323)+	Biglycan
Rps3	10116.ENSRNOP00000023935	https://smart.embl.de/smart/DDvec.cgi?smart=243:KH(42|111)+	40S ribosomal protein S3
Mylpf	10116.ENSRNOP00000023944	https://smart.embl.de/smart/DDvec.cgi?smart=169:EFh(29|57)+EFh(99|127)+	Myosin light chain, phosphorylatable, fast skeletal muscle
Itih3	10116.ENSRNOP00000023984	https://smart.embl.de/smart/DDvec.cgi?smart=887:SIGNAL(1|19)+VIT(29|158)+VWA(282|466)+Pfam_ITI_HC_C(680|868)+	Inter-alpha-trypsin inhibitor heavy chain H3
Acta1	10116.ENSRNOP00000024084	https://smart.embl.de/smart/DDvec.cgi?smart=377:ACTIN(7|377)+	Actin, alpha skeletal muscle
Prkcdbp	10116.ENSRNOP00000024119	https://smart.embl.de/smart/DDvec.cgi?smart=263:Pfam_PTRF_SDPR(19|211)+	Caveolae-associated protein 3
Myh7	10116.ENSRNOP00000024186	https://smart.embl.de/smart/DDvec.cgi?smart=1935:Pfam_Myosin_N(34|73)+MYSc(79|779)+IQ(780|802)+Pfam_Myosin_tail_1(843|1924)+	Myosin-7
Atp2a2	10116.ENSRNOP00000024347	https://smart.embl.de/smart/DDvec.cgi?smart=1045:Cation_ATPase_N(3|62)+TRANS(86|108)+Pfam_E1-E2_ATPase(123|331)+Pfam_Cation_ATPase(420|529)+Pfam_Hydrolase_3(684|748)+TRANS(761|783)+Pfam_Cation_ATPase_C(785|988)+TRANS(1016|1033)+	Sarcoplasmic/endoplasmic reticulum calcium ATPase 2
Ywhah	10116.ENSRNOP00000024388	https://smart.embl.de/smart/DDvec.cgi?smart=246:14_3_3(4|246)+	14-3-3 protein eta
Vim	10116.ENSRNOP00000024430	https://smart.embl.de/smart/DDvec.cgi?smart=466:Pfam_Filament_head(6|101)+Filament(102|410)+	Vimentin
Tpm1	10116.ENSRNOP00000024493	https://smart.embl.de/smart/DDvec.cgi?smart=287:Pfam_Tropomyosin(48|264)+	Tropomyosin alpha-1 chain
Hspa5	10116.ENSRNOP00000025064	https://smart.embl.de/smart/DDvec.cgi?smart=654:SIGNAL(1|18)+Pfam_MreB_Mbl(135|405)+	78 kDa glucose-regulated protein
Rps8	10116.ENSRNOP00000025796	https://smart.embl.de/smart/DDvec.cgi?smart=208:Pfam_Ribosomal_S8e(1|190)+	Ribosomal protein S8
Gsn	10116.ENSRNOP00000025857	https://smart.embl.de/smart/DDvec.cgi?smart=780:SIGNAL(1|25)+GEL(64|162)+GEL(183|275)+GEL(299|394)+GEL(443|540)+GEL(561|646)+GEL(666|761)+	Gelsolin
Olfml3	10116.ENSRNOP00000026075	https://smart.embl.de/smart/DDvec.cgi?smart=418:SIGNAL(1|33)+COIL(38|113)+OLF(150|413)+	Olfactomedin-like protein 3
Rps16	10116.ENSRNOP00000026576	https://smart.embl.de/smart/DDvec.cgi?smart=146:Pfam_Ribosomal_S9(14|146)+	Ribosomal protein S16
Lmna	10116.ENSRNOP00000026705	https://smart.embl.de/smart/DDvec.cgi?smart=665:Filament(30|386)+Pfam_LTD(433|544)+	Prelamin-A/C
Ptrf	10116.ENSRNOP00000026783	https://smart.embl.de/smart/DDvec.cgi?smart=392:Pfam_PTRF_SDPR(50|322)+	Caveolae-associated protein 1
Hsp90ab1	10116.ENSRNOP00000026920	https://smart.embl.de/smart/DDvec.cgi?smart=724:HATPase_c(35|189)+Pfam_HSP90(191|713)+	Heat shock protein HSP 90-beta
Actn4	10116.ENSRNOP00000027773	https://smart.embl.de/smart/DDvec.cgi?smart=911:CH(52|152)+CH(165|264)+SPEC(296|402)+SPEC(416|517)+SPEC(531|638)+SPEC(652|751)+EFh(769|797)+EFh(810|838)+efhand_Ca_insen(841|907)+	Alpha-actinin-4
Htra1	10116.ENSRNOP00000027860	https://smart.embl.de/smart/DDvec.cgi?smart=480:SIGNAL(1|22)+IB(35|112)+KAZAL(109|155)+Pfam_Trypsin_2(204|342)+PDZ(381|466)+	Serine protease HTRA1
Mcpt1l1	10116.ENSRNOP00000028012	https://smart.embl.de/smart/DDvec.cgi?smart=260:SIGNAL(1|18)+Tryp_SPc(20|239)+	Mast cell protease 1
Rpl27	10116.ENSRNOP00000028060	https://smart.embl.de/smart/DDvec.cgi?smart=136:KOW(4|31)+Pfam_Ribosomal_L27e(52|136)+	60S ribosomal protein L27
Vat1	10116.ENSRNOP00000028084	https://smart.embl.de/smart/DDvec.cgi?smart=404:Pfam_ADH_N(87|155)+Pfam_ADH_zinc_N_2(243|396)+	Synaptic vesicle membrane protein VAT-1 homolog
Myl3	10116.ENSRNOP00000028458	https://smart.embl.de/smart/DDvec.cgi?smart=200:EFh(58|88)+EFh(137|165)+	Myosin light chain 3
Rpl18	10116.ENSRNOP00000028555	https://smart.embl.de/smart/DDvec.cgi?smart=188:Pfam_Ribosomal_L18(2|188)+	60S ribosomal protein L18
Pygm	10116.ENSRNOP00000028636	https://smart.embl.de/smart/DDvec.cgi?smart=842:Pfam_Phosphorylase(113|828)+	Glycogen phosphorylase, muscle form
Myo1c	10116.ENSRNOP00000028929	https://smart.embl.de/smart/DDvec.cgi?smart=1044:MYSc(21|713)+IQ(714|736)+IQ(737|759)+Pfam_Myosin_TH1(855|1036)+	Unconventional myosin-Ic
Krt1	10116.ENSRNOP00000029276	https://smart.embl.de/smart/DDvec.cgi?smart=625:Pfam_Keratin_2_head(21|175)+Filament(178|491)+Pfam_Keratin_2_tail(492|621)+	Keratin, type II cytoskeletal 1
Krt10	10116.ENSRNOP00000029821	https://smart.embl.de/smart/DDvec.cgi?smart=526:Filament(144|458)+	Keratin, type I cytoskeletal 10
Fndc1	10116.ENSRNOP00000029878	https://smart.embl.de/smart/DDvec.cgi?smart=1779:SIGNAL(1|29)+FN3(103|186)+FN3(205|289)+FN3(305|389)+Pfam_fn3(1542|1627)+	Fibronectin type III domain-containing protein 1
Ywhaz	10116.ENSRNOP00000030885	https://smart.embl.de/smart/DDvec.cgi?smart=245:14_3_3(3|242)+	14-3-3 protein zeta/delta
Aldoa	10116.ENSRNOP00000032320	https://smart.embl.de/smart/DDvec.cgi?smart=364:Pfam_Glycolytic(15|364)+	Fructose-bisphosphate aldolase A
Fgg	10116.ENSRNOP00000032735	https://smart.embl.de/smart/DDvec.cgi?smart=437:SIGNAL(1|25)+Fib_alpha(29|173)+FBG(174|415)+	Fibrinogen gamma chain
Lrp1	10116.ENSRNOP00000034210	https://smart.embl.de/smart/DDvec.cgi?smart=4545:SIGNAL(1|19)+LDLa(27|67)+LDLa(72|111)+EGF(115|150)+EGF_CA(151|190)+LY(273|315)+LY(316|359)+LY(360|402)+EGF(478|521)+LY(552|594)+LY(595|638)+LY(641|690)+LY(691|734)+EGF(807|844)+LDLa(854|893)+LDLa(895|934)+LDLa(936|974)+LDLa(976|1014)+LDLa(1015|1054)+LDLa(1062|1100)+LDLa(1104|1143)+LDLa(1145|1185)+EGF(1185|1223)+EGF(1227|1263)+LY(1290|1332)+LY(1337|…	Low density lipoprotein receptor-related protein 1
Hsp90b1	10116.ENSRNOP00000034846	https://smart.embl.de/smart/DDvec.cgi?smart=804:SIGNAL(1|21)+HATPase_c(96|255)+Pfam_HSP90(257|775)+	Endoplasmin
Myh9l1	10116.ENSRNOP00000035440	https://smart.embl.de/smart/DDvec.cgi?smart=1960:Pfam_Myosin_N(29|69)+MYSc(75|777)+IQ(778|800)+Pfam_Myosin_tail_1(841|1921)+	Myosin-9
C4a	10116.ENSRNOP00000037902	https://smart.embl.de/smart/DDvec.cgi?smart=1737:SIGNAL(1|19)+Pfam_A2M_N(138|231)+A2M_N_2(470|609)+ANATO(700|734)+A2M(778|866)+Pfam_Thiol-ester_cl(994|1023)+Pfam_A2M_comp(1046|1312)+A2M_recep(1474|1563)+C345C(1607|1719)+	Complement C4
Hadha	10116.ENSRNOP00000038073	https://smart.embl.de/smart/DDvec.cgi?smart=763:Pfam_ECH_2(49|225)+Pfam_3HCDH_N(363|542)+Pfam_3HCDH(544|639)+Pfam_3HCDH(673|760)+	Trifunctional enzyme subunit alpha, mitochondrial
Anxa2	10116.ENSRNOP00000038428	https://smart.embl.de/smart/DDvec.cgi?smart=341:ANX(52|104)+ANX(124|176)+ANX(209|261)+ANX(284|336)+	Annexin A2
Hist1h2aa	10116.ENSRNOP00000039289	https://smart.embl.de/smart/DDvec.cgi?smart=130:H2A(3|123)+	Histone H2A type 4
LOC690131	10116.ENSRNOP00000039333	https://smart.embl.de/smart/DDvec.cgi?smart=130:H2A(3|123)+	Histone H2A type 2-A
Mlc2	10116.ENSRNOP00000039707	https://smart.embl.de/smart/DDvec.cgi?smart=60:Pfam_EF-hand_6(28|57)+	Myosin regulatory light chain 2, ventricular/cardiac muscle isoform
Vcp	10116.ENSRNOP00000040121	https://smart.embl.de/smart/DDvec.cgi?smart=806:CDC48_N(25|108)+CDC48_2(125|191)+AAA(237|373)+AAA(510|649)+Pfam_Vps4_C(711|762)+	Transitional endoplasmic reticulum ATPase
H3.3b	10116.ENSRNOP00000040434	https://smart.embl.de/smart/DDvec.cgi?smart=136:H3(34|136)+	Histone H3.3
A1i3	10116.ENSRNOP00000040516	https://smart.embl.de/smart/DDvec.cgi?smart=1476:TRANS(7|24)+Pfam_A2M_N(128|220)+A2M_N_2(456|606)+A2M(740|830)+Pfam_Thiol-ester_cl(963|992)+Pfam_A2M_comp(1012|1268)+A2M_recep(1378|1465)+	Alpha-1-inhibitor 3
Gapdh	10116.ENSRNOP00000040878	https://smart.embl.de/smart/DDvec.cgi?smart=333:Gp_dh_N(2|150)+Pfam_Gp_dh_C(155|312)+	Glyceraldehyde-3-phosphate dehydrogenase
Acan	10116.ENSRNOP00000042691	https://smart.embl.de/smart/DDvec.cgi?smart=2159:SIGNAL(1|19)+IGv(46|135)+LINK(151|248)+LINK(252|350)+LINK(485|579)+LINK(583|681)+EGF_CA(1907|1943)+CLECT(1949|2070)+CCP(2076|2132)+	Aggrecan core protein
Ubb	10116.ENSRNOP00000043934	https://smart.embl.de/smart/DDvec.cgi?smart=810:UBQ(1|72)+UBQ(77|148)+UBQ(153|224)+UBQ(229|300)+UBQ(305|376)+UBQ(381|452)+UBQ(457|528)+UBQ(533|604)+UBQ(609|680)+UBQ(685|756)+	Polyubiquitin-C
Rps4	10116.ENSRNOP00000043988	https://smart.embl.de/smart/DDvec.cgi?smart=263:Pfam_RS4NT(3|39)+S4(42|106)+Pfam_KOW(177|211)+Pfam_40S_S4_C(212|259)+	Ribosomal protein S4, X-linked
Hba1	10116.ENSRNOP00000044233	https://smart.embl.de/smart/DDvec.cgi?smart=142:Pfam_Globin(7|107)+	Hemoglobin subunit alpha-1/2
Actb	10116.ENSRNOP00000044296	https://smart.embl.de/smart/DDvec.cgi?smart=375:ACTIN(5|375)+	Actin, cytoplasmic 1
Gnb1	10116.ENSRNOP00000044340	https://smart.embl.de/smart/DDvec.cgi?smart=340:COIL(1|32)+WD40(44|83)+WD40(86|125)+WD40(132|170)+WD40(173|212)+WD40(215|254)+WD40(257|298)+WD40(301|340)+	Guanine nucleotide-binding protein G(I)/G(S)/G(T) subunit beta-1
H2afj	10116.ENSRNOP00000044986	https://smart.embl.de/smart/DDvec.cgi?smart=129:H2A(3|123)+	H2A histone family, member J
Olfml1	10116.ENSRNOP00000045069	https://smart.embl.de/smart/DDvec.cgi?smart=402:SIGNAL(1|26)+COIL(78|104)+OLF(143|397)+	Olfactomedin-like 1
Myh4	10116.ENSRNOP00000046362	https://smart.embl.de/smart/DDvec.cgi?smart=1939:Pfam_Myosin_N(35|74)+MYSc(80|783)+IQ(784|806)+Pfam_Myosin_tail_1(847|1928)+	Myosin-4
Hist1h2ah	10116.ENSRNOP00000046383	https://smart.embl.de/smart/DDvec.cgi?smart=130:H2A(3|123)+	Histone H2A type 1-E
COX2	10116.ENSRNOP00000046414	https://smart.embl.de/smart/DDvec.cgi?smart=227:Pfam_COX2_TM(1|83)+Pfam_COX2(95|214)+	Cytochrome c oxidase subunit 2
ENSRNOG00000033152	10116.ENSRNOP00000047371	https://smart.embl.de/smart/DDvec.cgi?smart=152:Pfam_Ribosomal_S13(14|142)+	40S ribosomal protein S18
Krt42	10116.ENSRNOP00000048162	https://smart.embl.de/smart/DDvec.cgi?smart=452:Filament(93|404)+	Keratin, type I cytoskeletal 42
Hbb	10116.ENSRNOP00000048250	https://smart.embl.de/smart/DDvec.cgi?smart=147:Pfam_Globin(8|112)+	Hemoglobin subunit beta-1
Srpx	10116.ENSRNOP00000048924	https://smart.embl.de/smart/DDvec.cgi?smart=464:SIGNAL(1|30)+CCP(57|115)+CCP(120|174)+Pfam_HYR(175|257)+CCP(262|317)+Pfam_DUF4174(332|451)+	Sushi-repeat-containing protein, X-linked
Tuba3a	10116.ENSRNOP00000049998	https://smart.embl.de/smart/DDvec.cgi?smart=450:Tubulin(49|246)+Tubulin_C(248|393)+COIL(415|445)+	Tubulin alpha-3 chain
Actg2	10116.ENSRNOP00000050322	https://smart.embl.de/smart/DDvec.cgi?smart=376:ACTIN(6|376)+	Actin, gamma-enteric smooth muscle
Fgb	10116.ENSRNOP00000050663	https://smart.embl.de/smart/DDvec.cgi?smart=503:Fib_alpha(77|222)+FBG(223|472)+	Fibrinogen beta chain
Apoe	10116.ENSRNOP00000050968	https://smart.embl.de/smart/DDvec.cgi?smart=312:SIGNAL(1|18)+Pfam_Apolipoprotein(73|284)+	Apolipoprotein E
P4hb	10116.ENSRNOP00000051841	https://smart.embl.de/smart/DDvec.cgi?smart=509:Pfam_Thioredoxin(27|134)+Pfam_Thioredoxin_6(163|347)+Pfam_Thioredoxin(370|475)+	Protein disulfide-isomerase
H1f0	10116.ENSRNOP00000053053	https://smart.embl.de/smart/DDvec.cgi?smart=194:H15(22|87)+	Histone H1.0
ENSRNOG00000037607	10116.ENSRNOP00000053863	https://smart.embl.de/smart/DDvec.cgi?smart=115:Pfam_Ribosomal_60s(17|114)+	60S acidic ribosomal protein P2
Cryab	10116.ENSRNOP00000055901	https://smart.embl.de/smart/DDvec.cgi?smart=175:Pfam_Crystallin(1|56)+Pfam_HSP20(67|162)+	Alpha-crystallin B chain
Hspa8	10116.ENSRNOP00000058593	https://smart.embl.de/smart/DDvec.cgi?smart=646:Pfam_MreB_Mbl(117|383)+	Heat shock cognate 71 kDa protein
Fga	10116.ENSRNOP00000060007	https://smart.embl.de/smart/DDvec.cgi?smart=782:SIGNAL(1|19)+Fib_alpha(49|193)+Pfam_Fibrinogen_aC(388|453)+FBG(543|779)+	Fibrinogen alpha chain
Hist3h2a	10116.ENSRNOP00000060549	https://smart.embl.de/smart/DDvec.cgi?smart=130:H2A(3|123)+	Histone H2A type 3
Actn1	10116.ENSRNOP00000061058	https://smart.embl.de/smart/DDvec.cgi?smart=892:CH(33|133)+CH(146|245)+Pfam_Spectrin(274|384)+SPEC(397|498)+SPEC(512|619)+SPEC(633|732)+EFh(750|778)+EFh(791|819)+efhand_Ca_insen(822|888)+	Alpha-actinin-1
Thbs4	10116.ENSRNOP00000062272	https://smart.embl.de/smart/DDvec.cgi?smart=959:TSPN(22|190)+Pfam_COMP(216|260)+EGF(287|323)+EGF_CA(324|376)+EGF_CA(377|417)+EGF(421|460)+Pfam_TSP_3(494|529)+Pfam_TSP_3(553|588)+Pfam_TSP_3(588|611)+Pfam_TSP_3(612|649)+Pfam_TSP_3(650|689)+Pfam_TSP_3(690|725)+Pfam_TSP_C(743|940)+	Thrombospondin-4
Igg-2a	10116.ENSRNOP00000062949	https://smart.embl.de/smart/DDvec.cgi?smart=336:IGc1(36|106)+Pfam_C1-set(129|217)+IGc1(251|324)+	Ig gamma-2A chain C region
Pdia6	10116.ENSRNOP00000064632	https://smart.embl.de/smart/DDvec.cgi?smart=445:SIGNAL(1|24)+Pfam_Thioredoxin(31|134)+Pfam_Thioredoxin(166|272)+	Protein disulfide-isomerase A6
Lamb2	10116.ENSRNOP00000065052	https://smart.embl.de/smart/DDvec.cgi?smart=1801:SIGNAL(1|35)+LamNT(44|284)+EGF_Lam(286|347)+EGF_Lam(350|410)+EGF_Lam(413|470)+EGF_Lam(473|522)+EGF_Lam(525|569)+EGF_Lam(786|831)+EGF_Lam(834|877)+EGF_Lam(880|927)+EGF_Lam(930|986)+EGF_Lam(989|1038)+EGF_Lam(1041|1095)+EGF_Lam(1098|1143)+EGF_Lam(1146|1190)+COIL(1263|1305)+COIL(1475|1529)+COIL(1576|1788)+	Laminin subunit beta-2
Lox	10116.ENSRNOP00000065314	https://smart.embl.de/smart/DDvec.cgi?smart=411:SIGNAL(1|21)+Pfam_Lysyl_oxidase(207|408)+	Protein-lysine 6-oxidase
LOC680498	10116.ENSRNOP00000066480	https://smart.embl.de/smart/DDvec.cgi?smart=136:H3(34|136)+	Similar to histone 1, H2ai
Hist4	10116.ENSRNOP00000066669	https://smart.embl.de/smart/DDvec.cgi?smart=103:H4(16|90)+	Histone cluster 1, H4b
Hist1h1d	10116.ENSRNOP00000066786	https://smart.embl.de/smart/DDvec.cgi?smart=219:H15(34|99)+	Histone H1.4
C3	10116.ENSRNOP00000066885	https://smart.embl.de/smart/DDvec.cgi?smart=1663:SIGNAL(1|24)+Pfam_A2M_N(129|224)+A2M_N_2(455|604)+ANATO(693|728)+A2M(770|866)+Pfam_Thiol-ester_cl(1000|1028)+Pfam_A2M_comp(1051|1284)+A2M_recep(1398|1493)+C345C(1533|1645)+	Complement C3
Comp	10116.ENSRNOP00000067037	https://smart.embl.de/smart/DDvec.cgi?smart=755:SIGNAL(1|21)+Pfam_COMP(28|72)+EGF(88|124)+EGF_CA(125|177)+EGF_CA(178|220)+EGF(226|265)+Pfam_TSP_3(299|334)+Pfam_TSP_3(358|393)+Pfam_TSP_3(393|416)+Pfam_TSP_3(417|454)+Pfam_TSP_3(455|490)+Pfam_TSP_3(491|526)+Pfam_TSP_C(544|741)+	Cartilage oligomeric matrix protein
Atp2a1	10116.ENSRNOP00000067246	https://smart.embl.de/smart/DDvec.cgi?smart=989:Cation_ATPase_N(3|77)+TRANS(88|107)+Pfam_E1-E2_ATPase(121|329)+Pfam_Cation_ATPase(418|477)+Pfam_Hydrolase_3(678|742)+TRANS(755|777)+Pfam_Cation_ATPase_C(779|982)+	Sarcoplasmic/endoplasmic reticulum calcium ATPase 1
Myl6l	10116.ENSRNOP00000067282	https://smart.embl.de/smart/DDvec.cgi?smart=151:Pfam_EF-hand_6(11|40)+	Myosin light polypeptide 6
Tpi1	10116.ENSRNOP00000067409	https://smart.embl.de/smart/DDvec.cgi?smart=249:Pfam_TIM(7|245)+	Triosephosphate isomerase-like
LOC684797	10116.ENSRNOP00000067422	https://smart.embl.de/smart/DDvec.cgi?smart=126:H2B(28|124)+	Histone H2B type 1
Aoc3	10116.ENSRNOP00000068449	https://smart.embl.de/smart/DDvec.cgi?smart=763:TRANS(7|29)+Pfam_Cu_amine_oxidN2(66|152)+Pfam_Cu_amine_oxidN3(169|269)+Pfam_Cu_amine_oxid(314|721)+	Membrane primary amine oxidase
