# Supplementary material for: Heterogeneity of proteome dynamics between connective tissue phases of adult tendon
Source: eLife. 2020 May 12;9:e55262. doi: 10.7554/eLife.55262 (PMC7217697; doi:10.7554/eLife.55262)
Supplement: Figure 3—source data 1. [file elife-55262-fig3-data1.xlsx]

## Sheet: string_protein_annotations_IFM
Gene name	identifier	domain_summary_url	annotation
Rpl10a	10116.ENSRNOP00000000603	https://smart.embl.de/smart/DDvec.cgi?smart=217:Pfam_Ribosomal_L1(18|212)+	60S ribosomal protein L10a
Coro1c	10116.ENSRNOP00000000886	https://smart.embl.de/smart/DDvec.cgi?smart=474:DUF1899(3|67)+WD40(66|109)+WD40(119|159)+WD40(162|202)+DUF1900(256|390)+	Coronin, actin binding protein 1C
Tubb5	10116.ENSRNOP00000001095	https://smart.embl.de/smart/DDvec.cgi?smart=444:Tubulin(47|244)+Tubulin_C(246|383)+COIL(405|436)+	Tubulin beta-5 chain
Ddx39b	10116.ENSRNOP00000001115	https://smart.embl.de/smart/DDvec.cgi?smart=428:DEXDc(64|265)+HELICc(301|382)+	Spliceosome RNA helicase Ddx39b
Ran	10116.ENSRNOP00000001247	https://smart.embl.de/smart/DDvec.cgi?smart=216:RAN(16|216)+	GTP-binding nuclear protein Ran
Rac1	10116.ENSRNOP00000001417	https://smart.embl.de/smart/DDvec.cgi?smart=192:RHO(6|179)+	Ras-related C3 botulinum toxin substrate 1
Pcbp3	10116.ENSRNOP00000001675	https://smart.embl.de/smart/DDvec.cgi?smart=319:KH(12|80)+KH(96|167)+KH(240|310)+	poly(rC) binding protein 3
Col6a1	10116.ENSRNOP00000001679	https://smart.embl.de/smart/DDvec.cgi?smart=1025:SIGNAL(1|19)+VWA(34|232)+Pfam_Collagen(252|312)+Pfam_Collagen(505|563)+VWA(612|798)+VWA(824|1005)+	Collagen, type VI, alpha 1
Col6a2	10116.ENSRNOP00000001695	https://smart.embl.de/smart/DDvec.cgi?smart=1027:SIGNAL(1|26)+VWA(52|239)+Pfam_Collagen(262|324)+Pfam_Collagen(417|476)+Pfam_Collagen(539|598)+VWA(621|809)+VWA(839|1022)+	Procollagen, type VI, alpha 2, isoform CRA_a
Aldh2	10116.ENSRNOP00000001816	https://smart.embl.de/smart/DDvec.cgi?smart=519:Pfam_Aldedh(47|510)+	Aldehyde dehydrogenase 2 family (mitochondrial)
Mdh2	10116.ENSRNOP00000001958	https://smart.embl.de/smart/DDvec.cgi?smart=338:Pfam_Ldh_1_N(25|168)+Pfam_Ldh_1_C(170|334)+	Malate dehydrogenase 2, NAD (mitochondrial)
Sod1	10116.ENSRNOP00000002885	https://smart.embl.de/smart/DDvec.cgi?smart=154:Pfam_Sod_Cu(9|150)+	Superoxide dismutase [Cu-Zn]
Nid1	10116.ENSRNOP00000003349	https://smart.embl.de/smart/DDvec.cgi?smart=1246:SIGNAL(1|30)+NIDO(106|270)+EGF(388|425)+G2F(426|665)+EGF(670|708)+EGF_CA(709|750)+EGF(760|800)+EGF_CA(801|839)+TY(874|922)+LY(969|1011)+LY(1012|1054)+LY(1055|1099)+LY(1100|1142)+LY(1143|1182)+EGF(1210|1243)+	Nidogen-1
Lamc1	10116.ENSRNOP00000003605	https://smart.embl.de/smart/DDvec.cgi?smart=1607:SIGNAL(1|33)+LamNT(42|282)+EGF_Lam(284|337)+EGF_Lam(340|393)+EGF_Lam(396|440)+EGF_Lam(443|490)+LamB(551|676)+Pfam_Laminin_EGF(683|718)+EGF_Lam(722|768)+EGF_Lam(771|823)+EGF_Lam(826|879)+EGF_Lam(882|930)+EGF_Lam(933|978)+EGF_Lam(981|1026)+COIL(1063|1594)+	Laminin, gamma 1
Alb	10116.ENSRNOP00000003921	https://smart.embl.de/smart/DDvec.cgi?smart=608:SIGNAL(1|18)+ALBUMIN(20|205)+ALBUMIN(212|397)+ALBUMIN(404|595)+	Serum albumin
Atp5b	10116.ENSRNOP00000003965	https://smart.embl.de/smart/DDvec.cgi?smart=529:Pfam_ATP-synt_ab_N(63|129)+AAA(198|382)+	ATP synthase subunit beta, mitochondrial
Ppl	10116.ENSRNOP00000004026	https://smart.embl.de/smart/DDvec.cgi?smart=1754:COIL(21|61)+SPEC(123|211)+SPEC(214|315)+SPEC(321|483)+SPEC(503|610)+SPEC(613|724)+COIL(784|817)+COIL(887|1040)+COIL(1062|1279)+COIL(1300|1642)+PLEC(1649|1683)+PLEC(1698|1733)+	Periplakin
Calr	10116.ENSRNOP00000004091	https://smart.embl.de/smart/DDvec.cgi?smart=416:SIGNAL(1|17)+Pfam_Calreticulin(23|259)+Pfam_Calreticulin(257|332)+COIL(348|415)+	Calreticulin
Prelp	10116.ENSRNOP00000004241	https://smart.embl.de/smart/DDvec.cgi?smart=377:SIGNAL(1|21)+LRRNT(67|101)+LRR(97|119)+LRR(121|143)+LRR(144|167)+LRR(168|188)+LRR(189|214)+LRR(215|238)+LRR(240|259)+LRR(285|308)+	Prolargin
Mpz	10116.ENSRNOP00000004279	https://smart.embl.de/smart/DDvec.cgi?smart=248:SIGNAL(1|29)+IGv(45|129)+TRANS(155|177)+Pfam_Myelin-PO_C(184|248)+	Myelin protein P0
Serpinf1	10116.ENSRNOP00000004313	https://smart.embl.de/smart/DDvec.cgi?smart=418:SIGNAL(1|19)+SERPIN(63|415)+	Serine (Or cysteine) peptidase inhibitor, clade F, member 1, isoform CRA_c
Fmod	10116.ENSRNOP00000004382	https://smart.embl.de/smart/DDvec.cgi?smart=376:SIGNAL(1|18)+LRRNT(75|109)+LRR(105|127)+LRR(154|177)+LRR(178|198)+LRR(199|221)+LRR_TYP(222|245)+LRR(246|266)+LRR(293|314)+LRR(342|367)+	Fibromodulin
Prdx2	10116.ENSRNOP00000004799	https://smart.embl.de/smart/DDvec.cgi?smart=198:Pfam_AhpC-TSA(8|141)+Pfam_1-cysPrx_C(161|196)+	Peroxiredoxin-2
Cbfa	10116.ENSRNOP00000004885	https://smart.embl.de/smart/DDvec.cgi?smart=332:Pfam_CBFNT(1|75)+RRM(76|148)+RRM(160|232)+	Type A/B hnRNP p40 (Heterogeneous nuclear ribonucleoprotein)
Col3a1	10116.ENSRNOP00000004956	https://smart.embl.de/smart/DDvec.cgi?smart=1463:SIGNAL(1|23)+VWC(33|89)+Pfam_Collagen(344|412)+Pfam_Collagen(1076|1135)+Pfam_Collagen(1136|1195)+COLFI(1228|1463)+	Collagen alpha-1(III) chain
Col5a2	10116.ENSRNOP00000005073	https://smart.embl.de/smart/DDvec.cgi?smart=1465:VWC(9|64)+Pfam_Collagen(100|157)+Pfam_Collagen(176|241)+Pfam_Collagen(347|411)+Pfam_Collagen(770|841)+Pfam_Collagen(920|988)+Pfam_Collagen(1040|1115)+Pfam_Collagen(1136|1198)+COLFI(1231|1465)+	Collagen, type V, alpha 2
Col1a1	10116.ENSRNOP00000005311	https://smart.embl.de/smart/DDvec.cgi?smart=1453:SIGNAL(1|22)+VWC(31|86)+Pfam_Collagen(98|154)+Pfam_Collagen(166|227)+Pfam_Collagen(225|284)+Pfam_Collagen(285|344)+Pfam_Collagen(335|404)+Pfam_Collagen(465|524)+Pfam_Collagen(705|779)+Pfam_Collagen(822|887)+Pfam_Collagen(1068|1127)+Pfam_Collagen(1122|1184)+COLFI(1217|1453)+	Collagen alpha-1(I) chain
Pfn1	10116.ENSRNOP00000005370	https://smart.embl.de/smart/DDvec.cgi?smart=140:PROF(2|140)+	Profilin-1
Krt17	10116.ENSRNOP00000005382	https://smart.embl.de/smart/DDvec.cgi?smart=433:Filament(83|394)+	Keratin, type I cytoskeletal 17
Lasp1	10116.ENSRNOP00000005522	https://smart.embl.de/smart/DDvec.cgi?smart=263:LIM(4|56)+NEBU(62|92)+NEBU(98|128)+SH3(207|263)+	LIM and SH3 domain protein 1
Rps27a	10116.ENSRNOP00000005872	https://smart.embl.de/smart/DDvec.cgi?smart=156:UBQ(1|72)+Pfam_Ribosomal_S27(102|147)+	Ribosomal protein S27a
Cltc	10116.ENSRNOP00000005987	https://smart.embl.de/smart/DDvec.cgi?smart=1675:Pfam_Clathrin_propel(19|56)+Pfam_Clathrin_propel(148|187)+Pfam_Clathrin_propel(198|234)+Pfam_Clathrin_propel(253|288)+Pfam_Clathrin_propel(296|330)+Pfam_Clathrin-link(331|354)+Pfam_Clathrin_H_link(356|421)+CLH(537|679)+CLH(686|828)+CLH(833|972)+CLH(979|1124)+CLH(1128|1269)+CLH(1274|1420)+CLH(1423|1582)+	Clathrin heavy chain 1
Dcn	10116.ENSRNOP00000006070	https://smart.embl.de/smart/DDvec.cgi?smart=354:SIGNAL(1|16)+LRRNT(48|80)+LRR(79|98)+LRR(99|122)+LRR_TYP(123|146)+LRR(147|167)+LRR(194|217)+LRR(239|262)+LRR(263|286)+	Decorin
Lum	10116.ENSRNOP00000006109	https://smart.embl.de/smart/DDvec.cgi?smart=338:SIGNAL(1|18)+LRRNT(36|70)+LRR(66|88)+LRR(89|114)+LRR(135|157)+LRR(158|181)+LRR_TYP(183|206)+LRR(207|227)+LRR(228|253)+LRR(254|275)+LRR(303|328)+	Lumican
Kera	10116.ENSRNOP00000006234	https://smart.embl.de/smart/DDvec.cgi?smart=351:SIGNAL(1|20)+LRRNT(42|76)+LRR(72|94)+LRR(121|144)+LRR(145|165)+LRR(166|191)+LRR(192|215)+LRR(262|284)+	Keratocan
A1bg	10116.ENSRNOP00000006273	https://smart.embl.de/smart/DDvec.cgi?smart=513:SIGNAL(1|20)+IG_like(34|109)+Pfam_Ig_2(223|314)+IG(328|415)+IG_like(426|511)+	Alpha-1B-glycoprotein
Tuba1a	10116.ENSRNOP00000006322	https://smart.embl.de/smart/DDvec.cgi?smart=451:Tubulin(49|246)+Tubulin_C(248|393)+	Tubulin alpha-1A chain
Rpl7a	10116.ENSRNOP00000006754	https://smart.embl.de/smart/DDvec.cgi?smart=265:Pfam_Ribosomal_L7Ae(121|215)+	Ribosomal protein L7a
Ywhae	10116.ENSRNOP00000007100	https://smart.embl.de/smart/DDvec.cgi?smart=255:14_3_3(4|245)+	14-3-3 protein epsilon
LOC688948	10116.ENSRNOP00000007304	https://smart.embl.de/smart/DDvec.cgi?smart=115:Pfam_Ribosomal_S26e(1|107)+	Ribosomal protein S26
Myh9	10116.ENSRNOP00000007398	https://smart.embl.de/smart/DDvec.cgi?smart=1960:Pfam_Myosin_N(29|69)+MYSc(75|777)+IQ(778|800)+Pfam_Myosin_tail_1(841|1921)+	Myosin, heavy chain 9, non-muscle
Sptbn1	10116.ENSRNOP00000008210	https://smart.embl.de/smart/DDvec.cgi?smart=2357:CH(56|156)+CH(175|273)+SPEC(305|411)+SPEC(425|525)+SPEC(531|635)+SPEC(641|741)+SPEC(747|846)+SPEC(852|952)+SPEC(958|1059)+SPEC(1065|1166)+SPEC(1172|1272)+SPEC(1278|1377)+SPEC(1482|1583)+SPEC(1589|1689)+SPEC(1695|1796)+SPEC(1802|1902)+SPEC(1908|2008)+SPEC(2014|2156)+PH(2191|2302)+	Spectrin, beta, non-erythrocytic 1
Hspa2	10116.ENSRNOP00000008504	https://smart.embl.de/smart/DDvec.cgi?smart=633:Pfam_HSP70(7|615)+	Heat shock-related 70 kDa protein 2
LOC297568	10116.ENSRNOP00000008574	https://smart.embl.de/smart/DDvec.cgi?smart=1298:SIGNAL(1|24)+Pfam_A2M_N(128|221)+A2M_N_2(457|607)+A2M(749|839)+A2M_recep(1200|1287)+	Alpha-1-inhibitor III
Cav1	10116.ENSRNOP00000009253	https://smart.embl.de/smart/DDvec.cgi?smart=178:Pfam_Caveolin(42|175)+	Caveolin-1
ENSRNOG00000007183	10116.ENSRNOP00000009407	https://smart.embl.de/smart/DDvec.cgi?smart=164:Pfam_Pro_isomerase(7|163)+	Peptidyl-prolyl cis-trans isomerase A
Pzp	10116.ENSRNOP00000009467	https://smart.embl.de/smart/DDvec.cgi?smart=1500:SIGNAL(1|24)+Pfam_A2M_N(126|219)+A2M_N_2(458|606)+A2M(752|842)+Pfam_Thiol-ester_cl(975|1004)+Pfam_A2M_comp(1024|1289)+A2M_recep(1400|1487)+	Alpha-1-macroglobulin
Rap1b	10116.ENSRNOP00000009511	https://smart.embl.de/smart/DDvec.cgi?smart=184:RAS(1|168)+	Ras-related protein Rap-1b
Hsp90aa1	10116.ENSRNOP00000009556	https://smart.embl.de/smart/DDvec.cgi?smart=733:HATPase_c(40|194)+Pfam_HSP90(196|724)+	Heat shock protein HSP 90-alpha
Rac2	10116.ENSRNOP00000009994	https://smart.embl.de/smart/DDvec.cgi?smart=192:RHO(6|179)+	Ras-related C3 botulinum toxin substrate 2 (rho family, small GTP binding protein Rac2)
Rab11b	10116.ENSRNOP00000010197	https://smart.embl.de/smart/DDvec.cgi?smart=218:RAB(12|175)+	Ras-related protein Rab-11B
Tagln2	10116.ENSRNOP00000011208	https://smart.embl.de/smart/DDvec.cgi?smart=199:CH(26|132)+Pfam_Calponin(174|198)+	Transgelin-2
Krt85	10116.ENSRNOP00000011374	https://smart.embl.de/smart/DDvec.cgi?smart=472:Pfam_Keratin_2_head(59|119)+Filament(122|433)+	Type II keratin Kb25
Mdh1	10116.ENSRNOP00000011429	https://smart.embl.de/smart/DDvec.cgi?smart=334:Pfam_Ldh_1_N(5|153)+Pfam_Ldh_1_C(156|331)+	Malate dehydrogenase, cytoplasmic
Krt5	10116.ENSRNOP00000011644	https://smart.embl.de/smart/DDvec.cgi?smart=396:Filament(2|296)+	Keratin, type II cytoskeletal 5
Acta2	10116.ENSRNOP00000011773	https://smart.embl.de/smart/DDvec.cgi?smart=377:ACTIN(7|377)+	Actin, alpha cardiac muscle 1
Arpc4	10116.ENSRNOP00000011937	https://smart.embl.de/smart/DDvec.cgi?smart=168:Pfam_ARPC4(1|167)+	Actin-related protein 2/3 complex subunit 4
Col5a1	10116.ENSRNOP00000012334	https://smart.embl.de/smart/DDvec.cgi?smart=1636:Pfam_Collagen(353|413)+Pfam_Collagen(434|510)+Pfam_Collagen(530|595)+Pfam_Collagen(605|663)+Pfam_Collagen(1262|1339)+COLFI(1406|1635)+	Collagen alpha-1(V) chain
Serpina1	10116.ENSRNOP00000012577	https://smart.embl.de/smart/DDvec.cgi?smart=411:SIGNAL(1|24)+SERPIN(53|409)+	Alpha-1-antiproteinase
Tmpo	10116.ENSRNOP00000012715	https://smart.embl.de/smart/DDvec.cgi?smart=360:LEM(17|60)+TRANS(318|340)+	Lamina-associated polypeptide 2, isoform beta
Tf	10116.ENSRNOP00000012725	https://smart.embl.de/smart/DDvec.cgi?smart=979:SIGNAL(1|19)+TR_FER(25|338)+TR_FER(346|673)+Pfam_SRPRB(770|949)+	Serotransferrin
Cyb5r3	10116.ENSRNOP00000012878	https://smart.embl.de/smart/DDvec.cgi?smart=307:Pfam_FAD_binding_6(50|157)+Pfam_NAD_binding_1(183|291)+	NADH-cytochrome b5 reductase 3
Dpysl2	10116.ENSRNOP00000012996	https://smart.embl.de/smart/DDvec.cgi?smart=572:Pfam_Amidohydro_1(64|453)+	Dihydropyrimidinase-related protein 2
Pkp1	10116.ENSRNOP00000013532	https://smart.embl.de/smart/DDvec.cgi?smart=605:ARM(277|317)+ARM(319|360)+ARM(361|416)+ARM(417|464)+ARM(516|557)+	Plakophilin 1
Lgals1	10116.ENSRNOP00000013538	https://smart.embl.de/smart/DDvec.cgi?smart=135:Gal-bind_lectin(8|134)+	Galectin-1
Eef1a1	10116.ENSRNOP00000013608	https://smart.embl.de/smart/DDvec.cgi?smart=462:Pfam_GTP_EFTU(5|238)+Pfam_GTP_EFTU_D2(260|327)+Pfam_GTP_EFTU_D3(333|442)+	Elongation factor 1-alpha 1
Glud1	10116.ENSRNOP00000013789	https://smart.embl.de/smart/DDvec.cgi?smart=558:Pfam_ELFV_dehydrog_N(112|242)+ELFV_dehydrog(265|554)+	Glutamate dehydrogenase 1, mitochondrial
Tubb4b	10116.ENSRNOP00000013863	https://smart.embl.de/smart/DDvec.cgi?smart=445:Tubulin(47|244)+Tubulin_C(246|383)+COIL(405|442)+	Tubulin beta-4B chain
H2afz	10116.ENSRNOP00000013919	https://smart.embl.de/smart/DDvec.cgi?smart=127:H2A(4|124)+	Histone H2A.Z
LOC299282	10116.ENSRNOP00000013961	https://smart.embl.de/smart/DDvec.cgi?smart=610:SERPIN(33|324)+Pfam_Serpin(325|416)+Pfam_Serpin(451|595)+	Serine protease inhibitor
Car3	10116.ENSRNOP00000014177	https://smart.embl.de/smart/DDvec.cgi?smart=260:Carb_anhydrase(5|259)+	Carbonic anhydrase 3
Acsl1	10116.ENSRNOP00000014235	https://smart.embl.de/smart/DDvec.cgi?smart=699:TRANS(21|43)+Pfam_AMP-binding(97|564)+	Long-chain-fatty-acid--CoA ligase 1
Anxa6	10116.ENSRNOP00000014464	https://smart.embl.de/smart/DDvec.cgi?smart=671:ANX(37|89)+ANX(109|161)+ANX(193|245)+ANX(268|320)+ANX(380|432)+ANX(452|504)+ANX(539|591)+ANX(614|666)+	Annexin A6
Fabp4	10116.ENSRNOP00000014701	https://smart.embl.de/smart/DDvec.cgi?smart=132:Pfam_Lipocalin(6|132)+	Fatty acid-binding protein, adipocyte
Cpa3	10116.ENSRNOP00000014970	https://smart.embl.de/smart/DDvec.cgi?smart=417:Pfam_Propep_M14(27|103)+Zn_pept(119|400)+	Carboxypeptidase A3, mast cell
Hnrnpa2b1	10116.ENSRNOP00000015152	https://smart.embl.de/smart/DDvec.cgi?smart=352:RRM(21|93)+RRM(112|184)+	Heterogeneous nuclear ribonucleoproteins A2/B1
Vcl	10116.ENSRNOP00000015179	https://smart.embl.de/smart/DDvec.cgi?smart=1066:Pfam_Vinculin(466|1066)+	Vinculin
Pkm	10116.ENSRNOP00000015331	https://smart.embl.de/smart/DDvec.cgi?smart=531:Pfam_PK(42|395)+Pfam_PK_C(410|528)+	Pyruvate kinase PKM
Rab11a	10116.ENSRNOP00000015598	https://smart.embl.de/smart/DDvec.cgi?smart=216:RAB(12|175)+	Ras-related protein Rab-11A
S100a6	10116.ENSRNOP00000015612	https://smart.embl.de/smart/DDvec.cgi?smart=89:Pfam_EF-hand_7(23|78)+	Protein S100-A6
Slc25a5	10116.ENSRNOP00000015913	https://smart.embl.de/smart/DDvec.cgi?smart=298:Pfam_Mito_carr(4|103)+Pfam_Mito_carr(109|206)+Pfam_Mito_carr(205|298)+	ADP/ATP translocase 2
Col2a1	10116.ENSRNOP00000016044	https://smart.embl.de/smart/DDvec.cgi?smart=1419:SIGNAL(1|25)+Pfam_Collagen(172|249)+Pfam_Collagen(358|429)+Pfam_Collagen(1087|1149)+COLFI(1184|1419)+	Collagen alpha-1(II) chain
Cp	10116.ENSRNOP00000016083	https://smart.embl.de/smart/DDvec.cgi?smart=1059:SIGNAL(1|19)+Pfam_Cu-oxidase_3(90|203)+Pfam_Cu-oxidase_2(248|356)+Pfam_Cu-oxidase_3(445|556)+Pfam_Cu-oxidase_3(786|897)+Pfam_Cu-oxidase_2(930|1054)+	Ceruloplasmin
Tgfbi	10116.ENSRNOP00000016389	https://smart.embl.de/smart/DDvec.cgi?smart=685:SIGNAL(1|23)+FAS1(139|239)+FAS1(276|374)+FAS1(411|501)+FAS1(538|635)+	Transforming growth factor, beta induced
Col1a2	10116.ENSRNOP00000016423	https://smart.embl.de/smart/DDvec.cgi?smart=1372:SIGNAL(1|20)+Pfam_Collagen(88|156)+Pfam_Collagen(475|536)+Pfam_Collagen(1051|1120)+COLFI(1138|1372)+	Collagen alpha-2(I) chain
Eef1a2	10116.ENSRNOP00000016947	https://smart.embl.de/smart/DDvec.cgi?smart=463:Pfam_GTP_EFTU(5|238)+Pfam_GTP_EFTU_D2(260|327)+Pfam_GTP_EFTU_D3(333|442)+	Elongation factor 1-alpha 2
Ywhab	10116.ENSRNOP00000016981	https://smart.embl.de/smart/DDvec.cgi?smart=246:14_3_3(5|244)+	14-3-3 protein beta/alpha
Ehd2	10116.ENSRNOP00000017353	https://smart.embl.de/smart/DDvec.cgi?smart=543:Pfam_EHD_N(24|56)+Pfam_Dynamin_N(61|221)+EH(443|536)+	EH domain-containing protein 2
Postn	10116.ENSRNOP00000017453	https://smart.embl.de/smart/DDvec.cgi?smart=810:SIGNAL(1|23)+FAS1(135|235)+FAS1(272|370)+FAS1(406|497)+FAS1(534|633)+	Periostin, osteoblast specific factor
Ldha	10116.ENSRNOP00000017468	https://smart.embl.de/smart/DDvec.cgi?smart=332:Pfam_Ldh_1_N(21|160)+Pfam_Ldh_1_C(163|331)+	Lactate dehydrogenase A
Krt31	10116.ENSRNOP00000018176	https://smart.embl.de/smart/DDvec.cgi?smart=414:Filament(55|364)+	Keratin 31
Tgm2	10116.ENSRNOP00000018328	https://smart.embl.de/smart/DDvec.cgi?smart=686:Pfam_Transglut_N(4|122)+TGc(269|361)+Pfam_Transglut_C(473|572)+Pfam_Transglut_C(586|685)+	Transglutaminase 2, C polypeptide, isoform CRA_a
Vdac2	10116.ENSRNOP00000018462	https://smart.embl.de/smart/DDvec.cgi?smart=295:Pfam_Porin_3(15|288)+	Voltage-dependent anion-selective channel protein 2
Capg	10116.ENSRNOP00000018562	https://smart.embl.de/smart/DDvec.cgi?smart=349:GEL(19|113)+GEL(136|228)+GEL(253|348)+	Macrophage-capping protein
Insrr	10116.ENSRNOP00000018638	https://smart.embl.de/smart/DDvec.cgi?smart=1299:SIGNAL(1|23)+Pfam_Recep_L_domain(47|159)+FU(225|268)+Pfam_Recep_L_domain(346|460)+FN3(483|586)+FN3(605|798)+FN3(816|899)+TRANS(922|944)+TyrKc(979|1245)+	Insulin receptor-related protein
Dsp	10116.ENSRNOP00000018649	https://smart.embl.de/smart/DDvec.cgi?smart=2877:SPEC(280|380)+COIL(418|454)+SPEC(896|1025)+COIL(1028|1365)+COIL(1389|1951)+PLEC(2016|2052)+PLEC(2053|2090)+PLEC(2091|2128)+PLEC(2129|2166)+PLEC(2170|2204)+PLEC(2205|2240)+PLEC(2258|2295)+PLEC(2296|2333)+PLEC(2334|2371)+PLEC(2372|2409)+PLEC(2413|2447)+PLEC(2463|2500)+PLEC(2514|2551)+PLEC(2617|2654)+PLEC(2655|2692)+PLEC(2693|2730)+PLEC(2731|2768)+PLE…	Desmoplakin
Krt15	10116.ENSRNOP00000019037	https://smart.embl.de/smart/DDvec.cgi?smart=447:Filament(93|405)+	Keratin, type I cytoskeletal 15
Krt19	10116.ENSRNOP00000019133	https://smart.embl.de/smart/DDvec.cgi?smart=403:Filament(82|393)+	Keratin, type I cytoskeletal 19
Lmnb1	10116.ENSRNOP00000019351	https://smart.embl.de/smart/DDvec.cgi?smart=587:Filament(31|387)+Pfam_LTD(435|545)+	Lamin-B1
Krt16	10116.ENSRNOP00000019477	https://smart.embl.de/smart/DDvec.cgi?smart=463:Filament(105|416)+	Keratin 16
Anxa5	10116.ENSRNOP00000019552	https://smart.embl.de/smart/DDvec.cgi?smart=319:ANX(30|82)+ANX(102|154)+ANX(186|238)+ANX(261|313)+	Annexin A5
Mug1	10116.ENSRNOP00000019969	https://smart.embl.de/smart/DDvec.cgi?smart=1481:TRANS(7|24)+Pfam_A2M_N(128|221)+A2M_N_2(451|601)+A2M(745|835)+Pfam_Thiol-ester_cl(968|997)+Pfam_A2M_comp(1017|1273)+A2M_recep(1383|1470)+	Murinoglobulin-1
Hspe1	10116.ENSRNOP00000020066	https://smart.embl.de/smart/DDvec.cgi?smart=102:Cpn10(8|100)+	10 kDa heat shock protein, mitochondrial
Pdia3	10116.ENSRNOP00000020478	https://smart.embl.de/smart/DDvec.cgi?smart=505:SIGNAL(1|24)+Pfam_Thioredoxin(26|131)+Pfam_Thioredoxin_6(160|355)+Pfam_Thioredoxin(377|483)+	Protein disulfide-isomerase A3
Col4a3	10116.ENSRNOP00000020669	https://smart.embl.de/smart/DDvec.cgi?smart=1670:SIGNAL(1|28)+Pfam_Collagen(42|103)+Pfam_Collagen(159|223)+Pfam_Collagen(284|344)+Pfam_Collagen(352|413)+Pfam_Collagen(481|546)+Pfam_Collagen(543|603)+Pfam_Collagen(684|745)+Pfam_Collagen(744|808)+Pfam_Collagen(846|903)+Pfam_Collagen(946|1007)+Pfam_Collagen(1058|1121)+Pfam_Collagen(1115|1177)+Pfam_Collagen(1175|1234)+Pfam_Collagen(1270|1350)+Pfam_Co…	Collagen, type IV, alpha 3
Atp5d	10116.ENSRNOP00000020670	https://smart.embl.de/smart/DDvec.cgi?smart=168:Pfam_ATP-synt_DE_N(38|119)+COIL(124|162)+	ATP synthase subunit delta, mitochondrial
Aspnl1	10116.ENSRNOP00000020704	https://smart.embl.de/smart/DDvec.cgi?smart=375:LRRNT(69|101)+LRR(100|119)+LRR(120|143)+LRR(144|167)+LRR(189|214)+LRR(236|258)+LRR(259|282)+LRR(283|305)+LRR(306|329)+	Asporin
Tuba1c	10116.ENSRNOP00000020932	https://smart.embl.de/smart/DDvec.cgi?smart=449:Tubulin(49|246)+Tubulin_C(248|393)+COIL(414|441)+	Tubulin alpha-1C chain
Myl12a	10116.ENSRNOP00000021048	https://smart.embl.de/smart/DDvec.cgi?smart=172:EFh(33|61)+EFh(102|130)+	Myosin regulatory light chain RLC-A
Tpm4	10116.ENSRNOP00000021073	https://smart.embl.de/smart/DDvec.cgi?smart=248:Pfam_Tropomyosin(12|248)+	Tropomyosin alpha-4 chain
ENSRNOG00000016220	10116.ENSRNOP00000021725	https://smart.embl.de/smart/DDvec.cgi?smart=165:RL11(13|144)+	Ribosomal protein L12
Ces1d	10116.ENSRNOP00000021812	https://smart.embl.de/smart/DDvec.cgi?smart=563:SIGNAL(1|18)+Pfam_Abhydrolase_3(135|240)+	Carboxylesterase 1D
Tkt	10116.ENSRNOP00000021862	https://smart.embl.de/smart/DDvec.cgi?smart=655:Pfam_E1_dh(140|271)+Transket_pyr(347|511)+Pfam_Transketolase_C(522|644)+	Transketolase
Ptms	10116.ENSRNOP00000022209	https://smart.embl.de/smart/DDvec.cgi?smart=102:Pfam_Prothymosin(2|99)+	Parathymosin
Tln1	10116.ENSRNOP00000022401	https://smart.embl.de/smart/DDvec.cgi?smart=2541:B41(82|313)+IRS(308|401)+Pfam_Talin_middle(491|652)+COIL(1048|1077)+Pfam_VBS(1849|1973)+ILWEQ(2336|2533)+	RCG55135, isoform CRA_b
Gnai2	10116.ENSRNOP00000022550	https://smart.embl.de/smart/DDvec.cgi?smart=355:G_alpha(13|354)+	Guanine nucleotide-binding protein G(i) subunit alpha-2
Cam	10116.ENSRNOP00000022603	https://smart.embl.de/smart/DDvec.cgi?smart=149:EFh(12|40)+EFh(48|76)+EFh(85|113)+EFh(121|149)+	Calmodulin 1
Hist1h2ba	10116.ENSRNOP00000022630	https://smart.embl.de/smart/DDvec.cgi?smart=127:H2B(29|125)+	Histone H2B type 1-A
Ppib	10116.ENSRNOP00000022828	https://smart.embl.de/smart/DDvec.cgi?smart=216:TRANS(11|33)+Pfam_Pro_isomerase(47|204)+	Peptidyl-prolyl cis-trans isomerase B
Atp5a1	10116.ENSRNOP00000022892	https://smart.embl.de/smart/DDvec.cgi?smart=553:Pfam_ATP-synt_ab_N(67|135)+Pfam_ATP-synt_ab(192|415)+Pfam_ATP-synt_ab_C(422|547)+	ATP synthase subunit alpha, mitochondrial
Serpinh1	10116.ENSRNOP00000022983	https://smart.embl.de/smart/DDvec.cgi?smart=417:SIGNAL(1|17)+SERPIN(51|408)+	Serpin H1
Prdx1	10116.ENSRNOP00000023132	https://smart.embl.de/smart/DDvec.cgi?smart=199:Pfam_AhpC-TSA(8|142)+Pfam_1-cysPrx_C(162|197)+	Peroxiredoxin-1
Anxa1	10116.ENSRNOP00000023664	https://smart.embl.de/smart/DDvec.cgi?smart=346:ANX(59|111)+ANX(131|183)+ANX(215|267)+ANX(290|342)+	Annexin A1
Bgn	10116.ENSRNOP00000023920	https://smart.embl.de/smart/DDvec.cgi?smart=369:SIGNAL(1|16)+LRRNT(63|95)+LRR(94|113)+LRR(114|137)+LRR(138|161)+LRR(162|182)+LRR(228|253)+LRR(254|276)+LRR(277|299)+LRR(300|323)+	Biglycan
Rps3	10116.ENSRNOP00000023935	https://smart.embl.de/smart/DDvec.cgi?smart=243:KH(42|111)+	40S ribosomal protein S3
Wdr1	10116.ENSRNOP00000024012	https://smart.embl.de/smart/DDvec.cgi?smart=606:WD40(47|86)+WD40(91|134)+WD40(135|175)+WD40(178|217)+WD40(220|262)+WD40(309|350)+WD40(354|392)+WD40(434|473)+WD40(478|517)+WD40(521|560)+WD40(564|603)+	WD repeat-containing protein 1
Acta1	10116.ENSRNOP00000024084	https://smart.embl.de/smart/DDvec.cgi?smart=377:ACTIN(7|377)+	Actin, alpha skeletal muscle
Eno1	10116.ENSRNOP00000024106	https://smart.embl.de/smart/DDvec.cgi?smart=434:Enolase_N(3|134)+Enolase_C(142|431)+	Alpha-enolase
Prkcdbp	10116.ENSRNOP00000024119	https://smart.embl.de/smart/DDvec.cgi?smart=263:Pfam_PTRF_SDPR(19|211)+	Caveolae-associated protein 3
Hist1h1b	10116.ENSRNOP00000024304	https://smart.embl.de/smart/DDvec.cgi?smart=222:H15(33|98)+	Histone H1.5
Vim	10116.ENSRNOP00000024430	https://smart.embl.de/smart/DDvec.cgi?smart=466:Pfam_Filament_head(6|101)+Filament(102|410)+	Vimentin
Anxa4	10116.ENSRNOP00000024436	https://smart.embl.de/smart/DDvec.cgi?smart=319:ANX(31|83)+ANX(103|155)+ANX(187|239)+ANX(262|314)+	Annexin A4
Hpx	10116.ENSRNOP00000024710	https://smart.embl.de/smart/DDvec.cgi?smart=460:SIGNAL(1|23)+HX(56|93)+HX(97|140)+HX(187|230)+HX(261|304)+HX(306|351)+	Hemopexin
Ncl	10116.ENSRNOP00000024712	https://smart.embl.de/smart/DDvec.cgi?smart=714:RRM(313|384)+RRM(399|467)+RRM(491|560)+RRM(577|647)+	Nucleolin
Gda	10116.ENSRNOP00000024775	https://smart.embl.de/smart/DDvec.cgi?smart=454:Pfam_Amidohydro_1(73|447)+	Guanine deaminase
Hspa5	10116.ENSRNOP00000025064	https://smart.embl.de/smart/DDvec.cgi?smart=654:SIGNAL(1|18)+Pfam_MreB_Mbl(135|405)+	78 kDa glucose-regulated protein
Ptma	10116.ENSRNOP00000025093	https://smart.embl.de/smart/DDvec.cgi?smart=112:Pfam_Prothymosin(2|111)+	Prothymosin alpha
Rpsa	10116.ENSRNOP00000025224	https://smart.embl.de/smart/DDvec.cgi?smart=295:Pfam_Ribosomal_S2(18|118)+Pfam_Ribosomal_S2(111|184)+Pfam_40S_SA_C(202|295)+	40S ribosomal protein SA
Rps8	10116.ENSRNOP00000025796	https://smart.embl.de/smart/DDvec.cgi?smart=208:Pfam_Ribosomal_S8e(1|190)+	Ribosomal protein S8
Gsn	10116.ENSRNOP00000025857	https://smart.embl.de/smart/DDvec.cgi?smart=780:SIGNAL(1|25)+GEL(64|162)+GEL(183|275)+GEL(299|394)+GEL(443|540)+GEL(561|646)+GEL(666|761)+	Gelsolin
Dpysl3	10116.ENSRNOP00000025880	https://smart.embl.de/smart/DDvec.cgi?smart=683:Pfam_Amidohydro_3(481|566)+	Dihydropyrimidinase-related protein 3
Gpd1	10116.ENSRNOP00000026200	https://smart.embl.de/smart/DDvec.cgi?smart=349:Pfam_NAD_Gly3P_dh_N(5|174)+Pfam_NAD_Gly3P_dh_C(193|340)+	Glycerol-3-phosphate dehydrogenase 1 (soluble)
Hspa9	10116.ENSRNOP00000026696	https://smart.embl.de/smart/DDvec.cgi?smart=679:Pfam_MreB_Mbl(165|427)+	Stress-70 protein, mitochondrial
Lmna	10116.ENSRNOP00000026705	https://smart.embl.de/smart/DDvec.cgi?smart=665:Filament(30|386)+Pfam_LTD(433|544)+	Prelamin-A/C
Col6a3	10116.ENSRNOP00000026719	https://smart.embl.de/smart/DDvec.cgi?smart=2819:SIGNAL(1|25)+VWA(36|215)+VWA(240|416)+VWA(443|619)+VWA(637|817)+VWA(835|1011)+VWA(1025|1204)+VWA(1229|1407)+VWA(1432|1605)+VWA(1634|1807)+VWA(1833|2022)+Pfam_Collagen(2080|2144)+VWA(2397|2579)+VWA(2614|2813)+	Collagen, type VI, alpha 3
Ptrf	10116.ENSRNOP00000026783	https://smart.embl.de/smart/DDvec.cgi?smart=392:Pfam_PTRF_SDPR(50|322)+	Caveolae-associated protein 1
Hsp90ab1	10116.ENSRNOP00000026920	https://smart.embl.de/smart/DDvec.cgi?smart=724:HATPase_c(35|189)+Pfam_HSP90(191|713)+	Heat shock protein HSP 90-beta
Uba52	10116.ENSRNOP00000027073	https://smart.embl.de/smart/DDvec.cgi?smart=128:UBQ(1|72)+Ribosomal_L40e(77|128)+	Ubiquitin-60S ribosomal protein L40
Actn4	10116.ENSRNOP00000027773	https://smart.embl.de/smart/DDvec.cgi?smart=911:CH(52|152)+CH(165|264)+SPEC(296|402)+SPEC(416|517)+SPEC(531|638)+SPEC(652|751)+EFh(769|797)+EFh(810|838)+efhand_Ca_insen(841|907)+	Alpha-actinin-4
Rps27l3	10116.ENSRNOP00000027780	https://smart.embl.de/smart/DDvec.cgi?smart=156:UBQ(1|72)+Pfam_Ribosomal_S27(102|147)+	Ribosomal protein S27-like 3
Col5a3	10116.ENSRNOP00000027897	https://smart.embl.de/smart/DDvec.cgi?smart=1737:SIGNAL(1|29)+LamG(89|210)+Pfam_Collagen(473|534)+Pfam_Collagen(1427|1489)+COLFI(1506|1736)+	Procollagen, type V, alpha 3, isoform CRA_b
Mcpt1l1	10116.ENSRNOP00000028012	https://smart.embl.de/smart/DDvec.cgi?smart=260:SIGNAL(1|18)+Tryp_SPc(20|239)+	Mast cell protease 1
Vat1	10116.ENSRNOP00000028084	https://smart.embl.de/smart/DDvec.cgi?smart=404:Pfam_ADH_N(87|155)+Pfam_ADH_zinc_N_2(243|396)+	Synaptic vesicle membrane protein VAT-1 homolog
Rpl18	10116.ENSRNOP00000028555	https://smart.embl.de/smart/DDvec.cgi?smart=188:Pfam_Ribosomal_L18(2|188)+	60S ribosomal protein L18
Myo1c	10116.ENSRNOP00000028929	https://smart.embl.de/smart/DDvec.cgi?smart=1044:MYSc(21|713)+IQ(714|736)+IQ(737|759)+Pfam_Myosin_TH1(855|1036)+	Unconventional myosin-Ic
Krt1	10116.ENSRNOP00000029276	https://smart.embl.de/smart/DDvec.cgi?smart=625:Pfam_Keratin_2_head(21|175)+Filament(178|491)+Pfam_Keratin_2_tail(492|621)+	Keratin, type II cytoskeletal 1
Krt83	10116.ENSRNOP00000029805	https://smart.embl.de/smart/DDvec.cgi?smart=495:Pfam_Keratin_2_head(3|107)+Filament(110|421)+	LOC681126 protein
Krt10	10116.ENSRNOP00000029821	https://smart.embl.de/smart/DDvec.cgi?smart=526:Filament(144|458)+	Keratin, type I cytoskeletal 10
Cad	10116.ENSRNOP00000030030	https://smart.embl.de/smart/DDvec.cgi?smart=2224:CPSase_sm_chain(1|139)+Pfam_GATase(179|356)+Pfam_CPSase_L_D2(514|718)+CPSase_L_D3(798|921)+Pfam_Dala_Dala_lig_C(1054|1242)+MGS(1327|1428)+Pfam_Amidohydro_1(1462|1741)+Pfam_OTCace_N(1923|2064)+Pfam_OTCace(2070|2220)+	Carbamoyl-phosphate synthetase 2, aspartate transcarbamylase, and dihydroorotase
Prdx6	10116.ENSRNOP00000030323	https://smart.embl.de/smart/DDvec.cgi?smart=224:Pfam_AhpC-TSA(7|146)+Pfam_1-cysPrx_C(166|205)+	Peroxiredoxin-6
Ywhaz	10116.ENSRNOP00000030885	https://smart.embl.de/smart/DDvec.cgi?smart=245:14_3_3(3|242)+	14-3-3 protein zeta/delta
Aldoa	10116.ENSRNOP00000032320	https://smart.embl.de/smart/DDvec.cgi?smart=364:Pfam_Glycolytic(15|364)+	Fructose-bisphosphate aldolase A
Rps25	10116.ENSRNOP00000033144	https://smart.embl.de/smart/DDvec.cgi?smart=125:Pfam_Ribosomal_S25(4|112)+	Ribosomal protein s25
Myh9l1	10116.ENSRNOP00000035440	https://smart.embl.de/smart/DDvec.cgi?smart=1960:Pfam_Myosin_N(29|69)+MYSc(75|777)+IQ(778|800)+Pfam_Myosin_tail_1(841|1921)+	Myosin-9
Gpd1l	10116.ENSRNOP00000036106	https://smart.embl.de/smart/DDvec.cgi?smart=351:Pfam_NAD_Gly3P_dh_N(7|175)+Pfam_NAD_Gly3P_dh_C(195|342)+	Glycerol-3-phosphate dehydrogenase 1-like
Hist1h2bd	10116.ENSRNOP00000037126	https://smart.embl.de/smart/DDvec.cgi?smart=126:H2B(28|124)+	Histone cluster 1, H2bd
Capza2	10116.ENSRNOP00000037217	https://smart.embl.de/smart/DDvec.cgi?smart=286:Pfam_F-actin_cap_A(17|284)+	F-actin-capping protein subunit alpha-2
Anxa2	10116.ENSRNOP00000038428	https://smart.embl.de/smart/DDvec.cgi?smart=341:ANX(52|104)+ANX(124|176)+ANX(209|261)+ANX(284|336)+	Annexin A2
ENSRNOG00000029996	10116.ENSRNOP00000038718	https://smart.embl.de/smart/DDvec.cgi?smart=410:Pfam_GTP_EFTU(7|186)+Pfam_GTP_EFTU_D2(208|275)+Pfam_GTP_EFTU_D3(281|390)+	Eukaryotic translation elongation factor 1 alpha 2
Rasl2-9	10116.ENSRNOP00000039019	https://smart.embl.de/smart/DDvec.cgi?smart=216:RAN(16|216)+	GTP-binding nuclear protein Ran, testis-specific isoform
Hist1h2aa	10116.ENSRNOP00000039289	https://smart.embl.de/smart/DDvec.cgi?smart=130:H2A(3|123)+	Histone H2A type 4
LOC690131	10116.ENSRNOP00000039333	https://smart.embl.de/smart/DDvec.cgi?smart=130:H2A(3|123)+	Histone H2A type 2-A
Col12a1	10116.ENSRNOP00000039795	https://smart.embl.de/smart/DDvec.cgi?smart=1932:SIGNAL(1|23)+FN3(25|103)+VWA(138|317)+FN3(334|413)+VWA(438|617)+FN3(632|710)+FN3(723|801)+FN3(814|892)+FN3(905|984)+FN3(995|1074)+FN3(1087|1166)+VWA(1197|1376)+FN3(1385|1463)+FN3(1474|1554)+FN3(1566|1643)+FN3(1655|1734)+FN3(1755|1834)+FN3(1846|1923)+	Collagen alpha-1(XII) chain
Plec	10116.ENSRNOP00000040018	https://smart.embl.de/smart/DDvec.cgi?smart=4557:CH(57|156)+CH(173|271)+COIL(401|430)+SPEC(529|626)+SPEC(629|729)+SPEC(735|897)+SPEC(993|1099)+SPEC(1102|1213)+SPEC(1220|1380)+PLEC(2661|2698)+PLEC(2699|2736)+PLEC(2737|2774)+PLEC(2775|2812)+PLEC(2813|2850)+PLEC(2854|2888)+PLEC(2989|3026)+PLEC(3027|3064)+PLEC(3065|3102)+PLEC(3103|3140)+PLEC(3141|3178)+PLEC(3181|3216)+PLEC(3358|3395)+PLEC(3396|3433)+…	Plectin
Vcp	10116.ENSRNOP00000040121	https://smart.embl.de/smart/DDvec.cgi?smart=806:CDC48_N(25|108)+CDC48_2(125|191)+AAA(237|373)+AAA(510|649)+Pfam_Vps4_C(711|762)+	Transitional endoplasmic reticulum ATPase
Rap1a	10116.ENSRNOP00000040409	https://smart.embl.de/smart/DDvec.cgi?smart=184:RAS(1|168)+	Ras-related protein Rap-1A
H3.3b	10116.ENSRNOP00000040434	https://smart.embl.de/smart/DDvec.cgi?smart=136:H3(34|136)+	Histone H3.3
A1i3	10116.ENSRNOP00000040516	https://smart.embl.de/smart/DDvec.cgi?smart=1476:TRANS(7|24)+Pfam_A2M_N(128|220)+A2M_N_2(456|606)+A2M(740|830)+Pfam_Thiol-ester_cl(963|992)+Pfam_A2M_comp(1012|1268)+A2M_recep(1378|1465)+	Alpha-1-inhibitor 3
Sfn	10116.ENSRNOP00000040819	https://smart.embl.de/smart/DDvec.cgi?smart=248:14_3_3(3|244)+	Stratifin
Gapdh	10116.ENSRNOP00000040878	https://smart.embl.de/smart/DDvec.cgi?smart=333:Gp_dh_N(2|150)+Pfam_Gp_dh_C(155|312)+	Glyceraldehyde-3-phosphate dehydrogenase
Aldoart2	10116.ENSRNOP00000041393	https://smart.embl.de/smart/DDvec.cgi?smart=364:Pfam_Glycolytic(15|364)+	Aldolase 1 A retrogene 2
Eef2	10116.ENSRNOP00000041821	https://smart.embl.de/smart/DDvec.cgi?smart=858:Pfam_MMR_HSR1(21|161)+Pfam_GTP_EFTU_D2(409|486)+Pfam_EFG_II(501|568)+EFG_IV(621|737)+EFG_C(739|828)+	Elongation factor 2
Sptan1	10116.ENSRNOP00000042382	https://smart.embl.de/smart/DDvec.cgi?smart=2473:SPEC(47|146)+SPEC(152|252)+SPEC(258|358)+SPEC(364|464)+SPEC(470|570)+SPEC(576|675)+SPEC(681|781)+SPEC(787|887)+SH3(970|1025)+SPEC(1094|1230)+SPEC(1236|1336)+SPEC(1342|1442)+SPEC(1448|1548)+SPEC(1554|1655)+SPEC(1661|1761)+SPEC(1767|1867)+SPEC(1873|1973)+SPEC(1979|2080)+SPEC(2094|2194)+SPEC(2208|2310)+EFh(2328|2356)+EFh(2371|2399)+efhand_Ca_insen(240…	Spectrin alpha chain, non-erythrocytic 1
RGD1566137	10116.ENSRNOP00000042681	https://smart.embl.de/smart/DDvec.cgi?smart=221:Pfam_Ribosomal_L1(22|216)+	Similar to ribosomal protein L10a
ENSRNOG00000031532	10116.ENSRNOP00000042800	https://smart.embl.de/smart/DDvec.cgi?smart=270:Pfam_Ribosomal_L7Ae(126|220)+	Similar to 60S ribosomal protein L7a
Myh11	10116.ENSRNOP00000043197	https://smart.embl.de/smart/DDvec.cgi?smart=1972:Pfam_Myosin_N(33|73)+MYSc(79|784)+IQ(785|807)+Pfam_Myosin_tail_1(848|1928)+	Myosin-11
RGD1306195	10116.ENSRNOP00000043623	https://smart.embl.de/smart/DDvec.cgi?smart=216:RAN(16|216)+	GTP-binding nuclear protein Ran
Ubb	10116.ENSRNOP00000043934	https://smart.embl.de/smart/DDvec.cgi?smart=810:UBQ(1|72)+UBQ(77|148)+UBQ(153|224)+UBQ(229|300)+UBQ(305|376)+UBQ(381|452)+UBQ(457|528)+UBQ(533|604)+UBQ(609|680)+UBQ(685|756)+	Polyubiquitin-C
Jup	10116.ENSRNOP00000043950	https://smart.embl.de/smart/DDvec.cgi?smart=745:ARM(132|171)+ARM(172|214)+ARM(215|255)+ARM(256|297)+ARM(299|340)+ARM(341|381)+ARM(383|420)+ARM(422|464)+ARM(469|510)+ARM(511|572)+ARM(573|613)+ARM(614|654)+	Junction plakoglobin
Hba2	10116.ENSRNOP00000044081	https://smart.embl.de/smart/DDvec.cgi?smart=142:Pfam_Globin(7|107)+	Hemoglobin alpha, adult chain 2
Hba1	10116.ENSRNOP00000044233	https://smart.embl.de/smart/DDvec.cgi?smart=142:Pfam_Globin(7|107)+	Hemoglobin subunit alpha-1/2
Actb	10116.ENSRNOP00000044296	https://smart.embl.de/smart/DDvec.cgi?smart=375:ACTIN(5|375)+	Actin, cytoplasmic 1
H2afj	10116.ENSRNOP00000044986	https://smart.embl.de/smart/DDvec.cgi?smart=129:H2A(3|123)+	H2A histone family, member J
LOC685069	10116.ENSRNOP00000045180	https://smart.embl.de/smart/DDvec.cgi?smart=128:H2A(5|125)+	H2A histone family, member V
Rab1	10116.ENSRNOP00000045598	https://smart.embl.de/smart/DDvec.cgi?smart=300:RAB(9|210)+	RAB1, member RAS oncogene family
Myl12b	10116.ENSRNOP00000045992	https://smart.embl.de/smart/DDvec.cgi?smart=172:EFh(33|61)+EFh(102|130)+	Myosin regulatory light chain 12B
ENSRNOG00000029310	10116.ENSRNOP00000046036	https://smart.embl.de/smart/DDvec.cgi?smart=266:Pfam_Ribosomal_L7Ae(122|216)+	Similar to 60S ribosomal protein L7a
ENSRNOG00000030107	10116.ENSRNOP00000046090	https://smart.embl.de/smart/DDvec.cgi?smart=154:Pfam_Ribosomal_S13(16|144)+	Ribosomal protein S18-like
Hist1h2ah	10116.ENSRNOP00000046383	https://smart.embl.de/smart/DDvec.cgi?smart=130:H2A(3|123)+	Histone H2A type 1-E
Hnrnpu	10116.ENSRNOP00000046783	https://smart.embl.de/smart/DDvec.cgi?smart=798:SAP(8|42)+SPRY(305|437)+Pfam_AAA_33(473|617)+COIL(624|651)+	Heterogeneous nuclear ribonucleoprotein U
ENSRNOG00000028826	10116.ENSRNOP00000047355	https://smart.embl.de/smart/DDvec.cgi?smart=266:Pfam_Ribosomal_L7Ae(122|216)+	Similar to 60S ribosomal protein L7a
ENSRNOG00000033152	10116.ENSRNOP00000047371	https://smart.embl.de/smart/DDvec.cgi?smart=152:Pfam_Ribosomal_S13(14|142)+	40S ribosomal protein S18
ENSRNOG00000029512	10116.ENSRNOP00000048116	https://smart.embl.de/smart/DDvec.cgi?smart=115:Pfam_Ribosomal_S26e(1|107)+	Ribosomal protein S26-like
Krt42	10116.ENSRNOP00000048162	https://smart.embl.de/smart/DDvec.cgi?smart=452:Filament(93|404)+	Keratin, type I cytoskeletal 42
Hbb	10116.ENSRNOP00000048250	https://smart.embl.de/smart/DDvec.cgi?smart=147:Pfam_Globin(8|112)+	Hemoglobin subunit beta-1
Tnxb	10116.ENSRNOP00000048983	https://smart.embl.de/smart/DDvec.cgi?smart=1163:FN3(43|122)+FN3(159|238)+FN3(254|334)+FN3(349|428)+FN3(451|531)+FN3(551|637)+FN3(653|730)+FN3(741|815)+FN3(828|903)+FBG(920|1154)+	Tenascin XB
H2afy	10116.ENSRNOP00000049143	https://smart.embl.de/smart/DDvec.cgi?smart=371:H2A(1|120)+A1pp(195|329)+	Core histone macro-H2A.1
ENSRNOG00000031244	10116.ENSRNOP00000049619	https://smart.embl.de/smart/DDvec.cgi?smart=266:Pfam_Ribosomal_L7Ae(122|216)+	60S ribosomal protein L7a-like
RGD1562404	10116.ENSRNOP00000049793	https://smart.embl.de/smart/DDvec.cgi?smart=152:Pfam_Ribosomal_S13(14|142)+	Predicted gene 10260
Tuba3a	10116.ENSRNOP00000049998	https://smart.embl.de/smart/DDvec.cgi?smart=450:Tubulin(49|246)+Tubulin_C(248|393)+COIL(415|445)+	Tubulin alpha-3 chain
Gsdma	10116.ENSRNOP00000050054	https://smart.embl.de/smart/DDvec.cgi?smart=446:Pfam_Gasdermin(3|421)+	Similar to gasdermin 1, isoform CRA_a
Actg2	10116.ENSRNOP00000050322	https://smart.embl.de/smart/DDvec.cgi?smart=376:ACTIN(6|376)+	Actin, gamma-enteric smooth muscle
Krt2	10116.ENSRNOP00000050471	https://smart.embl.de/smart/DDvec.cgi?smart=686:Pfam_Keratin_2_head(23|193)+Filament(196|511)+	Keratin, type II cytoskeletal 2 epidermal
Fgb	10116.ENSRNOP00000050663	https://smart.embl.de/smart/DDvec.cgi?smart=503:Fib_alpha(77|222)+FBG(223|472)+	Fibrinogen beta chain
Apoe	10116.ENSRNOP00000050968	https://smart.embl.de/smart/DDvec.cgi?smart=312:SIGNAL(1|18)+Pfam_Apolipoprotein(73|284)+	Apolipoprotein E
P4hb	10116.ENSRNOP00000051841	https://smart.embl.de/smart/DDvec.cgi?smart=509:Pfam_Thioredoxin(27|134)+Pfam_Thioredoxin_6(163|347)+Pfam_Thioredoxin(370|475)+	Protein disulfide-isomerase
Pcbp2	10116.ENSRNOP00000052173	https://smart.embl.de/smart/DDvec.cgi?smart=365:KH(12|80)+KH(96|167)+KH(286|356)+	poly(rC) binding protein 2
Rrbp1	10116.ENSRNOP00000052465	https://smart.embl.de/smart/DDvec.cgi?smart=1582:TRANS(9|31)+Pfam_Rib_recp_KP_reg(33|171)+COIL(874|1243)+COIL(1285|1439)+COIL(1460|1573)+	Ribosome binding protein 1
Hspg2	10116.ENSRNOP00000052803	https://smart.embl.de/smart/DDvec.cgi?smart=2165:EGF_Lam(21|68)+EGF_Lam(71|126)+IGc2(146|210)+IGc2(241|304)+IGc2(335|397)+IGc2(425|486)+IGc2(522|583)+IGc2(619|680)+IGc2(717|778)+IG(808|887)+IGc2(903|969)+IGc2(1001|1062)+IGc2(1088|1149)+IGc2(1189|1250)+IGc2(1278|1339)+IGc2(1364|1425)+LamG(1461|1605)+EGF(1624|1658)+EGF(1661|1697)+LamG(1724|1860)+EGF(1882|1916)+EGF(1921|1951)+LamG(2001|2138)+	Perlecan (heparan sulfate proteoglycan 2)
Fbn1	10116.ENSRNOP00000052876	https://smart.embl.de/smart/DDvec.cgi?smart=2872:SIGNAL(1|27)+EGF(118|146)+EGF(149|178)+Pfam_TB(194|237)+EGF_CA(246|287)+EGF_CA(288|329)+Pfam_TB(344|392)+EGF(453|490)+EGF_CA(491|530)+EGF_CA(531|572)+EGF_CA(573|613)+EGF_CA(614|654)+Pfam_TB(670|715)+EGF_CA(724|765)+EGF_CA(766|807)+EGF_CA(808|847)+Pfam_TB(862|897)+EGF_CA(911|952)+Pfam_TB(967|1012)+EGF_CA(1029|1070)+EGF_CA(1071|1113)+EGF_CA(1114|1155…	Fibrillin 1, isoform CRA_a
Col4a1	10116.ENSRNOP00000054197	https://smart.embl.de/smart/DDvec.cgi?smart=1669:SIGNAL(1|25)+Pfam_Collagen(37|124)+Pfam_Collagen(167|225)+Pfam_Collagen(274|335)+Pfam_Collagen(403|467)+Pfam_Collagen(472|533)+Pfam_Collagen(539|598)+Pfam_Collagen(689|746)+Pfam_Collagen(882|940)+Pfam_Collagen(943|1005)+Pfam_Collagen(996|1058)+Pfam_Collagen(1056|1117)+Pfam_Collagen(1112|1174)+Pfam_Collagen(1173|1232)+Pfam_Collagen(1384|1443)+C4(144…	Collagen, type IV, alpha 1
Col4a2	10116.ENSRNOP00000054270	https://smart.embl.de/smart/DDvec.cgi?smart=1690:SIGNAL(1|28)+Pfam_Collagen(56|124)+Pfam_Collagen(482|540)+Pfam_Collagen(585|650)+Pfam_Collagen(669|731)+Pfam_Collagen(796|866)+Pfam_Collagen(878|960)+Pfam_Collagen(961|1023)+Pfam_Collagen(1121|1194)+Pfam_Collagen(1313|1375)+C4(1467|1574)+C4(1575|1689)+	Collagen, type IV, alpha 2
Cd36	10116.ENSRNOP00000058398	https://smart.embl.de/smart/DDvec.cgi?smart=472:Pfam_CD36(14|463)+	Platelet glycoprotein 4
Hspa8	10116.ENSRNOP00000058593	https://smart.embl.de/smart/DDvec.cgi?smart=646:Pfam_MreB_Mbl(117|383)+	Heat shock cognate 71 kDa protein
Cfl1	10116.ENSRNOP00000059624	https://smart.embl.de/smart/DDvec.cgi?smart=166:ADF(19|154)+	Cofilin-1
Fga	10116.ENSRNOP00000060007	https://smart.embl.de/smart/DDvec.cgi?smart=782:SIGNAL(1|19)+Fib_alpha(49|193)+Pfam_Fibrinogen_aC(388|453)+FBG(543|779)+	Fibrinogen alpha chain
Krt86	10116.ENSRNOP00000060052	https://smart.embl.de/smart/DDvec.cgi?smart=488:Pfam_Keratin_2_head(2|102)+Filament(105|418)+	Type II keratin Kb26
Hist3h2a	10116.ENSRNOP00000060549	https://smart.embl.de/smart/DDvec.cgi?smart=130:H2A(3|123)+	Histone H2A type 3
H3f3c	10116.ENSRNOP00000060626	https://smart.embl.de/smart/DDvec.cgi?smart=136:H3(34|136)+	H3 histone, family 3C
ENSRNOG00000043176	10116.ENSRNOP00000061162	https://smart.embl.de/smart/DDvec.cgi?smart=472:Pfam_CD36(14|463)+	Similar to fatty acid translocase/CD36
Rps11	10116.ENSRNOP00000061250	https://smart.embl.de/smart/DDvec.cgi?smart=158:Pfam_Ribosomal_S17_N(5|73)+Pfam_Ribosomal_S17(75|144)+	Ribosomal protein S11
Cma1	10116.ENSRNOP00000061330	https://smart.embl.de/smart/DDvec.cgi?smart=247:SIGNAL(1|19)+Tryp_SPc(21|240)+	Chymase
Plin1	10116.ENSRNOP00000061809	https://smart.embl.de/smart/DDvec.cgi?smart=422:Pfam_Perilipin(14|400)+	Perilipin-1
Ddost	10116.ENSRNOP00000062365	https://smart.embl.de/smart/DDvec.cgi?smart=441:SIGNAL(1|27)+Pfam_DDOST_48kD(32|441)+	Dolichyl-diphosphooligosaccharide--protein glycosyltransferase 48 kDa subunit
Flna	10116.ENSRNOP00000062690	https://smart.embl.de/smart/DDvec.cgi?smart=2639:CH(45|147)+CH(168|264)+IG_FLMN(280|377)+IG_FLMN(380|477)+IG_FLMN(479|573)+IG_FLMN(575|666)+IG_FLMN(671|766)+IG_FLMN(768|869)+IG_FLMN(871|968)+IG_FLMN(970|1064)+IG_FLMN(1066|1157)+IG_FLMN(1159|1252)+IG_FLMN(1254|1352)+IG_FLMN(1354|1445)+IG_FLMN(1447|1542)+IG_FLMN(1544|1639)+IG_FLMN(1641|1735)+IG_FLMN(1764|1855)+IG_FLMN(1856|1947)+IG_FLMN(1948|2034)+…	Filamin, alpha (Predicted), isoform CRA_a
Ka11	10116.ENSRNOP00000062817	https://smart.embl.de/smart/DDvec.cgi?smart=491:Filament(133|444)+	Type I keratin KA11
Igg-2a	10116.ENSRNOP00000062949	https://smart.embl.de/smart/DDvec.cgi?smart=336:IGc1(36|106)+Pfam_C1-set(129|217)+IGc1(251|324)+	Ig gamma-2A chain C region
Kb23	10116.ENSRNOP00000063225	https://smart.embl.de/smart/DDvec.cgi?smart=483:Pfam_Keratin_2_head(2|102)+Filament(105|418)+	Type II keratin Kb21
LOC689064	10116.ENSRNOP00000063652	https://smart.embl.de/smart/DDvec.cgi?smart=147:Pfam_Globin(8|112)+	Hemoglobin subunit beta-2
Hspd1	10116.ENSRNOP00000063666	https://smart.embl.de/smart/DDvec.cgi?smart=573:Pfam_Cpn60_TCP1(47|550)+	60 kDa heat shock protein, mitochondrial
ENSRNOG00000042271	10116.ENSRNOP00000063726	https://smart.embl.de/smart/DDvec.cgi?smart=160:UBQ(8|79)+UBQ(84|155)+	Ubiquitin B-like
Col14a1	10116.ENSRNOP00000063778	https://smart.embl.de/smart/DDvec.cgi?smart=1793:SIGNAL(1|28)+FN3(30|108)+VWA(157|336)+FN3(354|434)+FN3(444|522)+FN3(536|613)+FN3(625|704)+FN3(736|815)+FN3(827|906)+FN3(917|996)+VWA(1028|1208)+TSPN(1227|1421)+Pfam_Collagen(1457|1511)+Pfam_Collagen(1649|1704)+	Collagen, type XIV, alpha 1
Hspa1l	10116.ENSRNOP00000063974	https://smart.embl.de/smart/DDvec.cgi?smart=641:Pfam_MreB_Mbl(119|384)+	Heat shock 70 kDa protein 1-like
ENSRNOG00000050788	10116.ENSRNOP00000064219	https://smart.embl.de/smart/DDvec.cgi?smart=483:Pfam_ATP-synt_ab_N(67|135)+Pfam_ATP-synt_ab(205|282)+Pfam_ATP-synt_ab(279|345)+Pfam_ATP-synt_ab_C(352|477)+	Uncharacterized protein
Fasn	10116.ENSRNOP00000064445	https://smart.embl.de/smart/DDvec.cgi?smart=2505:Pfam_ketoacyl-synt(1|239)+Pfam_Ketoacyl-synt_C(243|360)+Pfam_KAsynt_C_assoc(362|472)+Pfam_Acyl_transf_1(493|810)+Pfam_PS-DH(854|1107)+Pfam_Methyltransf_12(1238|1337)+PKS_ER(1532|1848)+PKS_KR(1879|2060)+Pfam_PP-binding(2120|2187)+Pfam_Thioesterase(2236|2495)+	Fatty acid synthase
ENSRNOG00000032944	10116.ENSRNOP00000064678	https://smart.embl.de/smart/DDvec.cgi?smart=151:Pfam_Ribosomal_S13(13|141)+	Uncharacterized LOC100912024
Lamb2	10116.ENSRNOP00000065052	https://smart.embl.de/smart/DDvec.cgi?smart=1801:SIGNAL(1|35)+LamNT(44|284)+EGF_Lam(286|347)+EGF_Lam(350|410)+EGF_Lam(413|470)+EGF_Lam(473|522)+EGF_Lam(525|569)+EGF_Lam(786|831)+EGF_Lam(834|877)+EGF_Lam(880|927)+EGF_Lam(930|986)+EGF_Lam(989|1038)+EGF_Lam(1041|1095)+EGF_Lam(1098|1143)+EGF_Lam(1146|1190)+COIL(1263|1305)+COIL(1475|1529)+COIL(1576|1788)+	Laminin subunit beta-2
RPS3A	10116.ENSRNOP00000065066	https://smart.embl.de/smart/DDvec.cgi?smart=264:Pfam_Ribosomal_S3Ae(16|221)+	40S ribosomal protein S3a
ENSRNOG00000048546	10116.ENSRNOP00000065281	https://smart.embl.de/smart/DDvec.cgi?smart=125:Pfam_Ribosomal_S25(4|112)+	Similar to 40S ribosomal protein S25
LOC684828	10116.ENSRNOP00000065338	https://smart.embl.de/smart/DDvec.cgi?smart=230:H15(35|100)+	Similar to Histone H1.2 (H1 VAR.1) (H1c)
rCG_44112	10116.ENSRNOP00000065601	https://smart.embl.de/smart/DDvec.cgi?smart=298:SIGNAL(1|19)+LRRNT(93|123)+LRR_TYP(142|165)+LRR(166|187)+LRR(212|235)+LRR(236|256)+	Osteoglycin (Predicted)
Rpn1	10116.ENSRNOP00000066002	https://smart.embl.de/smart/DDvec.cgi?smart=606:SIGNAL(1|23)+Pfam_Ribophorin_I(30|456)+	Dolichyl-diphosphooligosaccharide--protein glycosyltransferase subunit 1
Ahnak	10116.ENSRNOP00000066103	https://smart.embl.de/smart/DDvec.cgi?smart=5363:PDZ(20|91)+	AHNAK nucleoprotein
LOC298795	10116.ENSRNOP00000066315	https://smart.embl.de/smart/DDvec.cgi?smart=248:14_3_3(3|244)+	Similar to 14-3-3 protein sigma
LOC680498	10116.ENSRNOP00000066480	https://smart.embl.de/smart/DDvec.cgi?smart=136:H3(34|136)+	Similar to histone 1, H2ai
Sri	10116.ENSRNOP00000066499	https://smart.embl.de/smart/DDvec.cgi?smart=198:Pfam_EF-hand_5(45|58)+EFh(74|102)+EFh(104|132)+	LOC683667 protein
Hist4	10116.ENSRNOP00000066669	https://smart.embl.de/smart/DDvec.cgi?smart=103:H4(16|90)+	Histone cluster 1, H4b
C3	10116.ENSRNOP00000066885	https://smart.embl.de/smart/DDvec.cgi?smart=1663:SIGNAL(1|24)+Pfam_A2M_N(129|224)+A2M_N_2(455|604)+ANATO(693|728)+A2M(770|866)+Pfam_Thiol-ester_cl(1000|1028)+Pfam_A2M_comp(1051|1284)+A2M_recep(1398|1493)+C345C(1533|1645)+	Complement C3
Myl6l	10116.ENSRNOP00000067282	https://smart.embl.de/smart/DDvec.cgi?smart=151:Pfam_EF-hand_6(11|40)+	Myosin light polypeptide 6
LOC684797	10116.ENSRNOP00000067422	https://smart.embl.de/smart/DDvec.cgi?smart=126:H2B(28|124)+	Histone H2B type 1
Hspa1	10116.ENSRNOP00000067749	https://smart.embl.de/smart/DDvec.cgi?smart=641:Pfam_HSP70(6|612)+	Heat shock 70 kDa protein 1A
Rab1a	10116.ENSRNOP00000067788	https://smart.embl.de/smart/DDvec.cgi?smart=201:RAB(9|172)+	Ras-related protein Rab-1B
Dpt	10116.ENSRNOP00000068106	https://smart.embl.de/smart/DDvec.cgi?smart=202:SIGNAL(1|18)+Pfam_DERM(41|197)+	Dermatopontin (Predicted), isoform CRA_a
RGD1565355	10116.ENSRNOP00000068300	https://smart.embl.de/smart/DDvec.cgi?smart=472:Pfam_CD36(14|463)+	Platelet glycoprotein 4-like
Msn	10116.ENSRNOP00000068359	https://smart.embl.de/smart/DDvec.cgi?smart=577:B41(1|206)+FERM_C(210|299)+Pfam_ERM(338|577)+	Moesin
Aoc3	10116.ENSRNOP00000068449	https://smart.embl.de/smart/DDvec.cgi?smart=763:TRANS(7|29)+Pfam_Cu_amine_oxidN2(66|152)+Pfam_Cu_amine_oxidN3(169|269)+Pfam_Cu_amine_oxid(314|721)+	Membrane primary amine oxidase
