# Supplementary material for: Heterogeneity of proteome dynamics between connective tissue phases of adult tendon
Source: eLife. 2020 May 12;9:e55262. doi: 10.7554/eLife.55262 (PMC7217697; doi:10.7554/eLife.55262)
Supplement: Figure 4—source data 1. [file elife-55262-fig4-data1.xlsx]

## Sheet: protein_annotations_FM
Gene name	identifier	domain_summary_url	annotation
Col6a1	10116.ENSRNOP00000001679	https://smart.embl.de/smart/DDvec.cgi?smart=1025:SIGNAL(1|19)+VWA(34|232)+Pfam_Collagen(252|312)+Pfam_Collagen(505|563)+VWA(612|798)+VWA(824|1005)+	Collagen, type VI, alpha 1
Col6a2	10116.ENSRNOP00000001695	https://smart.embl.de/smart/DDvec.cgi?smart=1027:SIGNAL(1|26)+VWA(52|239)+Pfam_Collagen(262|324)+Pfam_Collagen(417|476)+Pfam_Collagen(539|598)+VWA(621|809)+VWA(839|1022)+	Procollagen, type VI, alpha 2, isoform CRA_a
Pcolce	10116.ENSRNOP00000001887	https://smart.embl.de/smart/DDvec.cgi?smart=468:SIGNAL(1|24)+CUB(36|148)+CUB(158|272)+C345C(352|458)+	Procollagen C-endopeptidase enhancer 1
Alb	10116.ENSRNOP00000003921	https://smart.embl.de/smart/DDvec.cgi?smart=608:SIGNAL(1|18)+ALBUMIN(20|205)+ALBUMIN(212|397)+ALBUMIN(404|595)+	Serum albumin
Prelp	10116.ENSRNOP00000004241	https://smart.embl.de/smart/DDvec.cgi?smart=377:SIGNAL(1|21)+LRRNT(67|101)+LRR(97|119)+LRR(121|143)+LRR(144|167)+LRR(168|188)+LRR(189|214)+LRR(215|238)+LRR(240|259)+LRR(285|308)+	Prolargin
Serpinf1	10116.ENSRNOP00000004313	https://smart.embl.de/smart/DDvec.cgi?smart=418:SIGNAL(1|19)+SERPIN(63|415)+	Serine (Or cysteine) peptidase inhibitor, clade F, member 1, isoform CRA_c
Fmod	10116.ENSRNOP00000004382	https://smart.embl.de/smart/DDvec.cgi?smart=376:SIGNAL(1|18)+LRRNT(75|109)+LRR(105|127)+LRR(154|177)+LRR(178|198)+LRR(199|221)+LRR_TYP(222|245)+LRR(246|266)+LRR(293|314)+LRR(342|367)+	Fibromodulin
Chad	10116.ENSRNOP00000004435	https://smart.embl.de/smart/DDvec.cgi?smart=358:SIGNAL(1|20)+LRRNT(21|54)+LRR_TYP(73|96)+LRR_TYP(97|120)+LRR_TYP(121|144)+LRR_TYP(145|168)+LRR(170|192)+LRR(193|216)+LRR_TYP(217|240)+LRR(245|265)+LRR(266|289)+LRRCT(299|346)+	Chondroadherin
Col3a1	10116.ENSRNOP00000004956	https://smart.embl.de/smart/DDvec.cgi?smart=1463:SIGNAL(1|23)+VWC(33|89)+Pfam_Collagen(344|412)+Pfam_Collagen(1076|1135)+Pfam_Collagen(1136|1195)+COLFI(1228|1463)+	Collagen alpha-1(III) chain
Col5a2	10116.ENSRNOP00000005073	https://smart.embl.de/smart/DDvec.cgi?smart=1465:VWC(9|64)+Pfam_Collagen(100|157)+Pfam_Collagen(176|241)+Pfam_Collagen(347|411)+Pfam_Collagen(770|841)+Pfam_Collagen(920|988)+Pfam_Collagen(1040|1115)+Pfam_Collagen(1136|1198)+COLFI(1231|1465)+	Collagen, type V, alpha 2
Tnmd	10116.ENSRNOP00000005214	https://smart.embl.de/smart/DDvec.cgi?smart=317:TRANS(31|50)+BRICHOS(93|186)+	Tenomodulin
Col1a1	10116.ENSRNOP00000005311	https://smart.embl.de/smart/DDvec.cgi?smart=1453:SIGNAL(1|22)+VWC(31|86)+Pfam_Collagen(98|154)+Pfam_Collagen(166|227)+Pfam_Collagen(225|284)+Pfam_Collagen(285|344)+Pfam_Collagen(335|404)+Pfam_Collagen(465|524)+Pfam_Collagen(705|779)+Pfam_Collagen(822|887)+Pfam_Collagen(1068|1127)+Pfam_Collagen(1122|1184)+COLFI(1217|1453)+	Collagen alpha-1(I) chain
Krt17	10116.ENSRNOP00000005382	https://smart.embl.de/smart/DDvec.cgi?smart=433:Filament(83|394)+	Keratin, type I cytoskeletal 17
Rps27a	10116.ENSRNOP00000005872	https://smart.embl.de/smart/DDvec.cgi?smart=156:UBQ(1|72)+Pfam_Ribosomal_S27(102|147)+	Ribosomal protein S27a
Dcn	10116.ENSRNOP00000006070	https://smart.embl.de/smart/DDvec.cgi?smart=354:SIGNAL(1|16)+LRRNT(48|80)+LRR(79|98)+LRR(99|122)+LRR_TYP(123|146)+LRR(147|167)+LRR(194|217)+LRR(239|262)+LRR(263|286)+	Decorin
Kera	10116.ENSRNOP00000006234	https://smart.embl.de/smart/DDvec.cgi?smart=351:SIGNAL(1|20)+LRRNT(42|76)+LRR(72|94)+LRR(121|144)+LRR(145|165)+LRR(166|191)+LRR(192|215)+LRR(262|284)+	Keratocan
A1bg	10116.ENSRNOP00000006273	https://smart.embl.de/smart/DDvec.cgi?smart=513:SIGNAL(1|20)+IG_like(34|109)+Pfam_Ig_2(223|314)+IG(328|415)+IG_like(426|511)+	Alpha-1B-glycoprotein
Tuba1a	10116.ENSRNOP00000006322	https://smart.embl.de/smart/DDvec.cgi?smart=451:Tubulin(49|246)+Tubulin_C(248|393)+	Tubulin alpha-1A chain
Krt5	10116.ENSRNOP00000011644	https://smart.embl.de/smart/DDvec.cgi?smart=396:Filament(2|296)+	Keratin, type II cytoskeletal 5
Acta2	10116.ENSRNOP00000011773	https://smart.embl.de/smart/DDvec.cgi?smart=377:ACTIN(7|377)+	Actin, alpha cardiac muscle 1
Serpina1	10116.ENSRNOP00000012577	https://smart.embl.de/smart/DDvec.cgi?smart=411:SIGNAL(1|24)+SERPIN(53|409)+	Alpha-1-antiproteinase
Tf	10116.ENSRNOP00000012725	https://smart.embl.de/smart/DDvec.cgi?smart=979:SIGNAL(1|19)+TR_FER(25|338)+TR_FER(346|673)+Pfam_SRPRB(770|949)+	Serotransferrin
Angptl7	10116.ENSRNOP00000012726	https://smart.embl.de/smart/DDvec.cgi?smart=337:SIGNAL(1|21)+COIL(36|110)+FBG(117|333)+	Angiopoietin-related protein 7-like
Dpysl2	10116.ENSRNOP00000012996	https://smart.embl.de/smart/DDvec.cgi?smart=572:Pfam_Amidohydro_1(64|453)+	Dihydropyrimidinase-related protein 2
Col9a3	10116.ENSRNOP00000013105	https://smart.embl.de/smart/DDvec.cgi?smart=680:Pfam_Collagen(49|114)+Pfam_Collagen(174|236)+Pfam_Collagen(456|519)+Pfam_Collagen(545|606)+	Collagen, type IX, alpha 3
Pnp	10116.ENSRNOP00000013582	https://smart.embl.de/smart/DDvec.cgi?smart=288:Pfam_PNP_UDP_1(25|279)+	Purine nucleoside phosphorylase
Eef1a1	10116.ENSRNOP00000013608	https://smart.embl.de/smart/DDvec.cgi?smart=462:Pfam_GTP_EFTU(5|238)+Pfam_GTP_EFTU_D2(260|327)+Pfam_GTP_EFTU_D3(333|442)+	Elongation factor 1-alpha 1
Serpina3c	10116.ENSRNOP00000013896	https://smart.embl.de/smart/DDvec.cgi?smart=416:SIGNAL(1|20)+SERPIN(54|415)+	Serine protease inhibitor A3K
LOC299282	10116.ENSRNOP00000013961	https://smart.embl.de/smart/DDvec.cgi?smart=610:SERPIN(33|324)+Pfam_Serpin(325|416)+Pfam_Serpin(451|595)+	Serine protease inhibitor
Ckb	10116.ENSRNOP00000015122	https://smart.embl.de/smart/DDvec.cgi?smart=381:Pfam_ATP-gua_PtransN(24|94)+Pfam_ATP-gua_Ptrans(153|367)+	Creatine kinase B-type
S100a6	10116.ENSRNOP00000015612	https://smart.embl.de/smart/DDvec.cgi?smart=89:Pfam_EF-hand_7(23|78)+	Protein S100-A6
Col2a1	10116.ENSRNOP00000016044	https://smart.embl.de/smart/DDvec.cgi?smart=1419:SIGNAL(1|25)+Pfam_Collagen(172|249)+Pfam_Collagen(358|429)+Pfam_Collagen(1087|1149)+COLFI(1184|1419)+	Collagen alpha-1(II) chain
Clec3a	10116.ENSRNOP00000016307	https://smart.embl.de/smart/DDvec.cgi?smart=196:SIGNAL(1|22)+CLECT(68|192)+	C-type lectin domain family 3, member A
Tgfbi	10116.ENSRNOP00000016389	https://smart.embl.de/smart/DDvec.cgi?smart=685:SIGNAL(1|23)+FAS1(139|239)+FAS1(276|374)+FAS1(411|501)+FAS1(538|635)+	Transforming growth factor, beta induced
Col1a2	10116.ENSRNOP00000016423	https://smart.embl.de/smart/DDvec.cgi?smart=1372:SIGNAL(1|20)+Pfam_Collagen(88|156)+Pfam_Collagen(475|536)+Pfam_Collagen(1051|1120)+COLFI(1138|1372)+	Collagen alpha-2(I) chain
Eef1a2	10116.ENSRNOP00000016947	https://smart.embl.de/smart/DDvec.cgi?smart=463:Pfam_GTP_EFTU(5|238)+Pfam_GTP_EFTU_D2(260|327)+Pfam_GTP_EFTU_D3(333|442)+	Elongation factor 1-alpha 2
Krt15	10116.ENSRNOP00000019037	https://smart.embl.de/smart/DDvec.cgi?smart=447:Filament(93|405)+	Keratin, type I cytoskeletal 15
Krt19	10116.ENSRNOP00000019133	https://smart.embl.de/smart/DDvec.cgi?smart=403:Filament(82|393)+	Keratin, type I cytoskeletal 19
Krt16	10116.ENSRNOP00000019477	https://smart.embl.de/smart/DDvec.cgi?smart=463:Filament(105|416)+	Keratin 16
Anxa5	10116.ENSRNOP00000019552	https://smart.embl.de/smart/DDvec.cgi?smart=319:ANX(30|82)+ANX(102|154)+ANX(186|238)+ANX(261|313)+	Annexin A5
Fn1	10116.ENSRNOP00000019772	https://smart.embl.de/smart/DDvec.cgi?smart=1913:FN1(1|21)+FN1(22|65)+FN3(70|151)+FN3(180|259)+FN3(271|349)+FN3(367|446)+FN3(457|535)+FN3(547|621)+FN3(634|716)+FN3(725|807)+FN3(818|898)+FN3(909|988)+FN3(999|1078)+FN3(1093|1172)+FN3(1183|1262)+FN3(1273|1352)+FN3(1365|1444)+FN3(1454|1535)+FN3(1629|1708)+FN1(1732|1776)+FN1(1777|1819)+FN1(1821|1861)+	Fibronectin
Tuba1c	10116.ENSRNOP00000020932	https://smart.embl.de/smart/DDvec.cgi?smart=449:Tubulin(49|246)+Tubulin_C(248|393)+COIL(414|441)+	Tubulin alpha-1C chain
Ppib	10116.ENSRNOP00000022828	https://smart.embl.de/smart/DDvec.cgi?smart=216:TRANS(11|33)+Pfam_Pro_isomerase(47|204)+	Peptidyl-prolyl cis-trans isomerase B
Hist1h2af	10116.ENSRNOP00000022965	https://smart.embl.de/smart/DDvec.cgi?smart=130:H2A(3|123)+	Histone cluster 1, H2af
Serpinh1	10116.ENSRNOP00000022983	https://smart.embl.de/smart/DDvec.cgi?smart=417:SIGNAL(1|17)+SERPIN(51|408)+	Serpin H1
Col11a1	10116.ENSRNOP00000023794	https://smart.embl.de/smart/DDvec.cgi?smart=1816:TSPN(37|228)+Pfam_Collagen(445|503)+Pfam_Collagen(583|653)+Pfam_Collagen(751|817)+Pfam_Collagen(986|1053)+Pfam_Collagen(1493|1555)+COLFI(1586|1815)+	Collagen alpha-1(XI) chain
Bgn	10116.ENSRNOP00000023920	https://smart.embl.de/smart/DDvec.cgi?smart=369:SIGNAL(1|16)+LRRNT(63|95)+LRR(94|113)+LRR(114|137)+LRR(138|161)+LRR(162|182)+LRR(228|253)+LRR(254|276)+LRR(277|299)+LRR(300|323)+	Biglycan
Itih3	10116.ENSRNOP00000023984	https://smart.embl.de/smart/DDvec.cgi?smart=887:SIGNAL(1|19)+VIT(29|158)+VWA(282|466)+Pfam_ITI_HC_C(680|868)+	Inter-alpha-trypsin inhibitor heavy chain H3
Acta1	10116.ENSRNOP00000024084	https://smart.embl.de/smart/DDvec.cgi?smart=377:ACTIN(7|377)+	Actin, alpha skeletal muscle
Eno1	10116.ENSRNOP00000024106	https://smart.embl.de/smart/DDvec.cgi?smart=434:Enolase_N(3|134)+Enolase_C(142|431)+	Alpha-enolase
Hpx	10116.ENSRNOP00000024710	https://smart.embl.de/smart/DDvec.cgi?smart=460:SIGNAL(1|23)+HX(56|93)+HX(97|140)+HX(187|230)+HX(261|304)+HX(306|351)+	Hemopexin
Gda	10116.ENSRNOP00000024775	https://smart.embl.de/smart/DDvec.cgi?smart=454:Pfam_Amidohydro_1(73|447)+	Guanine deaminase
Gsn	10116.ENSRNOP00000025857	https://smart.embl.de/smart/DDvec.cgi?smart=780:SIGNAL(1|25)+GEL(64|162)+GEL(183|275)+GEL(299|394)+GEL(443|540)+GEL(561|646)+GEL(666|761)+	Gelsolin
Lmna	10116.ENSRNOP00000026705	https://smart.embl.de/smart/DDvec.cgi?smart=665:Filament(30|386)+Pfam_LTD(433|544)+	Prelamin-A/C
Col6a3	10116.ENSRNOP00000026719	https://smart.embl.de/smart/DDvec.cgi?smart=2819:SIGNAL(1|25)+VWA(36|215)+VWA(240|416)+VWA(443|619)+VWA(637|817)+VWA(835|1011)+VWA(1025|1204)+VWA(1229|1407)+VWA(1432|1605)+VWA(1634|1807)+VWA(1833|2022)+Pfam_Collagen(2080|2144)+VWA(2397|2579)+VWA(2614|2813)+	Collagen, type VI, alpha 3
Ptrf	10116.ENSRNOP00000026783	https://smart.embl.de/smart/DDvec.cgi?smart=392:Pfam_PTRF_SDPR(50|322)+	Caveolae-associated protein 1
Uba52	10116.ENSRNOP00000027073	https://smart.embl.de/smart/DDvec.cgi?smart=128:UBQ(1|72)+Ribosomal_L40e(77|128)+	Ubiquitin-60S ribosomal protein L40
Rps27l3	10116.ENSRNOP00000027780	https://smart.embl.de/smart/DDvec.cgi?smart=156:UBQ(1|72)+Pfam_Ribosomal_S27(102|147)+	Ribosomal protein S27-like 3
Cilp2	10116.ENSRNOP00000027990	https://smart.embl.de/smart/DDvec.cgi?smart=1188:SIGNAL(1|20)+Pfam_Mucin2_WxxW(58|143)+TSP1(159|207)+Pfam_CarboxypepD_reg(236|314)+IGc2(331|393)+	Cartilage intermediate layer protein 2
Krt1	10116.ENSRNOP00000029276	https://smart.embl.de/smart/DDvec.cgi?smart=625:Pfam_Keratin_2_head(21|175)+Filament(178|491)+Pfam_Keratin_2_tail(492|621)+	Keratin, type II cytoskeletal 1
Krt83	10116.ENSRNOP00000029805	https://smart.embl.de/smart/DDvec.cgi?smart=495:Pfam_Keratin_2_head(3|107)+Filament(110|421)+	LOC681126 protein
Krt10	10116.ENSRNOP00000029821	https://smart.embl.de/smart/DDvec.cgi?smart=526:Filament(144|458)+	Keratin, type I cytoskeletal 10
Anxa2	10116.ENSRNOP00000038428	https://smart.embl.de/smart/DDvec.cgi?smart=341:ANX(52|104)+ANX(124|176)+ANX(209|261)+ANX(284|336)+	Annexin A2
Hist1h2aa	10116.ENSRNOP00000039289	https://smart.embl.de/smart/DDvec.cgi?smart=130:H2A(3|123)+	Histone H2A type 4
LOC690131	10116.ENSRNOP00000039333	https://smart.embl.de/smart/DDvec.cgi?smart=130:H2A(3|123)+	Histone H2A type 2-A
Col12a1	10116.ENSRNOP00000039795	https://smart.embl.de/smart/DDvec.cgi?smart=1932:SIGNAL(1|23)+FN3(25|103)+VWA(138|317)+FN3(334|413)+VWA(438|617)+FN3(632|710)+FN3(723|801)+FN3(814|892)+FN3(905|984)+FN3(995|1074)+FN3(1087|1166)+VWA(1197|1376)+FN3(1385|1463)+FN3(1474|1554)+FN3(1566|1643)+FN3(1655|1734)+FN3(1755|1834)+FN3(1846|1923)+	Collagen alpha-1(XII) chain
H3.3b	10116.ENSRNOP00000040434	https://smart.embl.de/smart/DDvec.cgi?smart=136:H3(34|136)+	Histone H3.3
A1i3	10116.ENSRNOP00000040516	https://smart.embl.de/smart/DDvec.cgi?smart=1476:TRANS(7|24)+Pfam_A2M_N(128|220)+A2M_N_2(456|606)+A2M(740|830)+Pfam_Thiol-ester_cl(963|992)+Pfam_A2M_comp(1012|1268)+A2M_recep(1378|1465)+	Alpha-1-inhibitor 3
Gapdh	10116.ENSRNOP00000040878	https://smart.embl.de/smart/DDvec.cgi?smart=333:Gp_dh_N(2|150)+Pfam_Gp_dh_C(155|312)+	Glyceraldehyde-3-phosphate dehydrogenase
Itih1	10116.ENSRNOP00000041165	https://smart.embl.de/smart/DDvec.cgi?smart=904:SIGNAL(1|25)+VIT(31|160)+VWA(284|465)+Pfam_ITI_HC_C(698|885)+	Inter-alpha trypsin inhibitor, heavy chain 1
Acan	10116.ENSRNOP00000042691	https://smart.embl.de/smart/DDvec.cgi?smart=2159:SIGNAL(1|19)+IGv(46|135)+LINK(151|248)+LINK(252|350)+LINK(485|579)+LINK(583|681)+EGF_CA(1907|1943)+CLECT(1949|2070)+CCP(2076|2132)+	Aggrecan core protein
Ubb	10116.ENSRNOP00000043934	https://smart.embl.de/smart/DDvec.cgi?smart=810:UBQ(1|72)+UBQ(77|148)+UBQ(153|224)+UBQ(229|300)+UBQ(305|376)+UBQ(381|452)+UBQ(457|528)+UBQ(533|604)+UBQ(609|680)+UBQ(685|756)+	Polyubiquitin-C
Jup	10116.ENSRNOP00000043950	https://smart.embl.de/smart/DDvec.cgi?smart=745:ARM(132|171)+ARM(172|214)+ARM(215|255)+ARM(256|297)+ARM(299|340)+ARM(341|381)+ARM(383|420)+ARM(422|464)+ARM(469|510)+ARM(511|572)+ARM(573|613)+ARM(614|654)+	Junction plakoglobin
Hba2	10116.ENSRNOP00000044081	https://smart.embl.de/smart/DDvec.cgi?smart=142:Pfam_Globin(7|107)+	Hemoglobin alpha, adult chain 2
Hba1	10116.ENSRNOP00000044233	https://smart.embl.de/smart/DDvec.cgi?smart=142:Pfam_Globin(7|107)+	Hemoglobin subunit alpha-1/2
Actb	10116.ENSRNOP00000044296	https://smart.embl.de/smart/DDvec.cgi?smart=375:ACTIN(5|375)+	Actin, cytoplasmic 1
H2afj	10116.ENSRNOP00000044986	https://smart.embl.de/smart/DDvec.cgi?smart=129:H2A(3|123)+	H2A histone family, member J
Hist1h2ah	10116.ENSRNOP00000046383	https://smart.embl.de/smart/DDvec.cgi?smart=130:H2A(3|123)+	Histone H2A type 1-E
Krt42	10116.ENSRNOP00000048162	https://smart.embl.de/smart/DDvec.cgi?smart=452:Filament(93|404)+	Keratin, type I cytoskeletal 42
Cilp	10116.ENSRNOP00000048194	https://smart.embl.de/smart/DDvec.cgi?smart=1183:SIGNAL(1|21)+Pfam_Mucin2_WxxW(55|139)+TSP1(152|201)+IGc2(321|382)+	Cartilage intermediate layer protein, nucleotide pyrophosphohydrolase
Hbb	10116.ENSRNOP00000048250	https://smart.embl.de/smart/DDvec.cgi?smart=147:Pfam_Globin(8|112)+	Hemoglobin subunit beta-1
Col11a2	10116.ENSRNOP00000048846	https://smart.embl.de/smart/DDvec.cgi?smart=1617:SIGNAL(1|22)+TSPN(31|214)+Pfam_Collagen(306|364)+Pfam_Collagen(399|460)+Pfam_Collagen(953|1030)+Pfam_Collagen(1163|1235)+Pfam_Collagen(1325|1384)+COLFI(1421|1616)+	Collagen, type XI, alpha 2
Tnxb	10116.ENSRNOP00000048983	https://smart.embl.de/smart/DDvec.cgi?smart=1163:FN3(43|122)+FN3(159|238)+FN3(254|334)+FN3(349|428)+FN3(451|531)+FN3(551|637)+FN3(653|730)+FN3(741|815)+FN3(828|903)+FBG(920|1154)+	Tenascin XB
Actg2	10116.ENSRNOP00000050322	https://smart.embl.de/smart/DDvec.cgi?smart=376:ACTIN(6|376)+	Actin, gamma-enteric smooth muscle
Krt2	10116.ENSRNOP00000050471	https://smart.embl.de/smart/DDvec.cgi?smart=686:Pfam_Keratin_2_head(23|193)+Filament(196|511)+	Keratin, type II cytoskeletal 2 epidermal
Apoe	10116.ENSRNOP00000050968	https://smart.embl.de/smart/DDvec.cgi?smart=312:SIGNAL(1|18)+Pfam_Apolipoprotein(73|284)+	Apolipoprotein E
P4hb	10116.ENSRNOP00000051841	https://smart.embl.de/smart/DDvec.cgi?smart=509:Pfam_Thioredoxin(27|134)+Pfam_Thioredoxin_6(163|347)+Pfam_Thioredoxin(370|475)+	Protein disulfide-isomerase
ENSRNOG00000036701	10116.ENSRNOP00000051859	https://smart.embl.de/smart/DDvec.cgi?smart=374:ACTIN(4|374)+	Actin, gamma 1
Fbn1	10116.ENSRNOP00000052876	https://smart.embl.de/smart/DDvec.cgi?smart=2872:SIGNAL(1|27)+EGF(118|146)+EGF(149|178)+Pfam_TB(194|237)+EGF_CA(246|287)+EGF_CA(288|329)+Pfam_TB(344|392)+EGF(453|490)+EGF_CA(491|530)+EGF_CA(531|572)+EGF_CA(573|613)+EGF_CA(614|654)+Pfam_TB(670|715)+EGF_CA(724|765)+EGF_CA(766|807)+EGF_CA(808|847)+Pfam_TB(862|897)+EGF_CA(911|952)+Pfam_TB(967|1012)+EGF_CA(1029|1070)+EGF_CA(1071|1113)+EGF_CA(1114|1155…	Fibrillin 1, isoform CRA_a
Ahsg	10116.ENSRNOP00000055223	https://smart.embl.de/smart/DDvec.cgi?smart=351:SIGNAL(1|18)+CY(22|133)+CY(145|247)+	Alpha-2-HS-glycoprotein
Hspa8	10116.ENSRNOP00000058593	https://smart.embl.de/smart/DDvec.cgi?smart=646:Pfam_MreB_Mbl(117|383)+	Heat shock cognate 71 kDa protein
Prg4	10116.ENSRNOP00000059900	https://smart.embl.de/smart/DDvec.cgi?smart=1060:SIGNAL(1|24)+SO(26|68)+SO(69|108)+HX(806|848)+HX(850|893)+	Proteoglycan 4
ENSRNOG00000030814	10116.ENSRNOP00000059981	https://smart.embl.de/smart/DDvec.cgi?smart=427:Pfam_Keratin_2_head(1|100)+Filament(103|417)+	Type II keratin 23
Krt86	10116.ENSRNOP00000060052	https://smart.embl.de/smart/DDvec.cgi?smart=488:Pfam_Keratin_2_head(2|102)+Filament(105|418)+	Type II keratin Kb26
Hist3h2a	10116.ENSRNOP00000060549	https://smart.embl.de/smart/DDvec.cgi?smart=130:H2A(3|123)+	Histone H2A type 3
Mfge8	10116.ENSRNOP00000060643	https://smart.embl.de/smart/DDvec.cgi?smart=483:SIGNAL(1|22)+EGF(27|61)+EGF(67|108)+FA58C(166|323)+FA58C(327|483)+	MFGE8 long form
Thbs4	10116.ENSRNOP00000062272	https://smart.embl.de/smart/DDvec.cgi?smart=959:TSPN(22|190)+Pfam_COMP(216|260)+EGF(287|323)+EGF_CA(324|376)+EGF_CA(377|417)+EGF(421|460)+Pfam_TSP_3(494|529)+Pfam_TSP_3(553|588)+Pfam_TSP_3(588|611)+Pfam_TSP_3(612|649)+Pfam_TSP_3(650|689)+Pfam_TSP_3(690|725)+Pfam_TSP_C(743|940)+	Thrombospondin-4
Ka11	10116.ENSRNOP00000062817	https://smart.embl.de/smart/DDvec.cgi?smart=491:Filament(133|444)+	Type I keratin KA11
Igg-2a	10116.ENSRNOP00000062949	https://smart.embl.de/smart/DDvec.cgi?smart=336:IGc1(36|106)+Pfam_C1-set(129|217)+IGc1(251|324)+	Ig gamma-2A chain C region
Kb23	10116.ENSRNOP00000063225	https://smart.embl.de/smart/DDvec.cgi?smart=483:Pfam_Keratin_2_head(2|102)+Filament(105|418)+	Type II keratin Kb21
ENSRNOG00000042271	10116.ENSRNOP00000063726	https://smart.embl.de/smart/DDvec.cgi?smart=160:UBQ(8|79)+UBQ(84|155)+	Ubiquitin B-like
Krt79	10116.ENSRNOP00000063782	https://smart.embl.de/smart/DDvec.cgi?smart=528:Pfam_Keratin_2_head(75|136)+Filament(139|453)+	Keratin 79
LOC684828	10116.ENSRNOP00000065338	https://smart.embl.de/smart/DDvec.cgi?smart=230:H15(35|100)+	Similar to Histone H1.2 (H1 VAR.1) (H1c)
rCG_44112	10116.ENSRNOP00000065601	https://smart.embl.de/smart/DDvec.cgi?smart=298:SIGNAL(1|19)+LRRNT(93|123)+LRR_TYP(142|165)+LRR(166|187)+LRR(212|235)+LRR(236|256)+	Osteoglycin (Predicted)
ENSRNOG00000050777	10116.ENSRNOP00000065728	https://smart.embl.de/smart/DDvec.cgi?smart=462:Pfam_GTP_EFTU(5|238)+Pfam_GTP_EFTU_D2(260|327)+Pfam_GTP_EFTU_D3(333|442)+	Elongation factor 1-alpha
Thbs1	10116.ENSRNOP00000066041	https://smart.embl.de/smart/DDvec.cgi?smart=681:TSP1(6|58)+EGF(61|98)+EGF(102|156)+EGF(160|201)+Pfam_TSP_3(238|273)+Pfam_TSP_3(273|296)+Pfam_TSP_3(297|332)+Pfam_TSP_3(332|355)+Pfam_TSP_3(356|393)+Pfam_TSP_3(394|429)+Pfam_TSP_3(430|465)+Pfam_TSP_C(483|680)+	Thrombospondin 1
Ahnak	10116.ENSRNOP00000066103	https://smart.embl.de/smart/DDvec.cgi?smart=5363:PDZ(20|91)+	AHNAK nucleoprotein
Tnc	10116.ENSRNOP00000066422	https://smart.embl.de/smart/DDvec.cgi?smart=2018:SIGNAL(1|22)+EGF(189|217)+EGF_like(220|248)+EGF(251|280)+EGF(283|311)+EGF_like(314|342)+EGF(345|373)+EGF(376|404)+EGF(407|435)+EGF(438|466)+EGF(469|497)+EGF(500|528)+EGF(531|559)+EGF(562|590)+EGF(593|621)+FN3(623|701)+FN3(712|794)+FN3(803|884)+FN3(893|974)+FN3(985|1062)+FN3(1074|1152)+FN3(1165|1243)+FN3(1256|1334)+FN3(1347|1427)+FN3(1438|1517)+FN3(…	Tenascin C
LOC680498	10116.ENSRNOP00000066480	https://smart.embl.de/smart/DDvec.cgi?smart=136:H3(34|136)+	Similar to histone 1, H2ai
Hist4	10116.ENSRNOP00000066669	https://smart.embl.de/smart/DDvec.cgi?smart=103:H4(16|90)+	Histone cluster 1, H4b
Hist1h1d	10116.ENSRNOP00000066786	https://smart.embl.de/smart/DDvec.cgi?smart=219:H15(34|99)+	Histone H1.4
C3	10116.ENSRNOP00000066885	https://smart.embl.de/smart/DDvec.cgi?smart=1663:SIGNAL(1|24)+Pfam_A2M_N(129|224)+A2M_N_2(455|604)+ANATO(693|728)+A2M(770|866)+Pfam_Thiol-ester_cl(1000|1028)+Pfam_A2M_comp(1051|1284)+A2M_recep(1398|1493)+C345C(1533|1645)+	Complement C3
Hist3h2bb	10116.ENSRNOP00000067000	https://smart.embl.de/smart/DDvec.cgi?smart=126:H2B(28|124)+	Histone cluster 3, H2bb
Comp	10116.ENSRNOP00000067037	https://smart.embl.de/smart/DDvec.cgi?smart=755:SIGNAL(1|21)+Pfam_COMP(28|72)+EGF(88|124)+EGF_CA(125|177)+EGF_CA(178|220)+EGF(226|265)+Pfam_TSP_3(299|334)+Pfam_TSP_3(358|393)+Pfam_TSP_3(393|416)+Pfam_TSP_3(417|454)+Pfam_TSP_3(455|490)+Pfam_TSP_3(491|526)+Pfam_TSP_C(544|741)+	Cartilage oligomeric matrix protein
ENSRNOG00000045820	10116.ENSRNOP00000067076	https://smart.embl.de/smart/DDvec.cgi?smart=136:H3(34|136)+	Histone H3
LOC684797	10116.ENSRNOP00000067422	https://smart.embl.de/smart/DDvec.cgi?smart=126:H2B(28|124)+	Histone H2B type 1
