# Supplementary material for: Heterogeneity of proteome dynamics between connective tissue phases of adult tendon
Source: eLife. 2020 May 12;9:e55262. doi: 10.7554/eLife.55262 (PMC7217697; doi:10.7554/eLife.55262)
Supplement: Figure 7—source data 1. — hl tab contains protein half-life information organized by peptide sequence and hl-data tab contains isotopomer relative abundance at each time point. [file elife-55262-fig7-data1.xlsx]

## Sheet: hl
ID	Uniprot	Peptide	DP	z	mi	SS	a	pss	kp	N	k	dk	R2
0	Q01129	M(15.9949)IVIELGGNPLK	12	2	0	0.020975	0.446683	0.0558	0.7913	18	0.032849	0.008009	0.949294
1	Q01129	ISPEAFKPLVK	12	3	0	0.030947	0.479023	0.0558	0.7913	19	0.034253	0.011492	0.911362
2	Q01129	NSGIENGALQGM(15.9949)K	12	2	0	0.034869	0.462489	0.0558	0.7913	28	0.029553	0.009532	0.928937
3	Q01129	ISPEAFKPLVK	10	2	0	0.032547	0.479023	0.0558	0.7913	19	0.029309	0.010552	0.894732
4	Q01129	SVFNGLNR	8	2	0	0.02535	0.601915	0.0558	0.7913	13	0.017468	0.004115	0.912615
5	Q01129	KTSYTAVSLYSNPVR	5	3	0	0.087326	0.382857	0.0558	0.7913	23	0.011914	0.066819	-0.116145
6	P48679	ITESEEVVSR	8	2	0	0.040367	0.540539	0.0558	0.7913	23	0.037427	0.013217	0.698405
7	P48679	SVGGSGGGSFGDNLVTR	9	2	0	0.124562	0.429784	0.0558	0.7913	30	0.014355	0.012418	-1.9627
8	P48679	NSNLVGAAHEELQQSR	8	3	0	0.054191	0.390108	0.0558	0.7913	43	0.022046	0.032746	0.213451
9	P48679	LADALQELR	9	2	0	0.03192	0.565474	0.0558	0.7913	23	0.033215	0.00894	0.932929
10	Q68FP1	QTQVSVLPEGGETPLFK	6	2	0	0.008865	0.351808	0.0558	0.7913	31	0.652539	0.068395	0.952431
11	Q68FP1	EVQGFESSTFQGYFK	6	2	0	0.064447	0.359194	0.0558	0.7913	28	0.09248	0.062982	0.359532
12	Q68FP1	AGALNSNDAFVLK	10	2	0	0.296585	0.474508	0.0558	0.7913	25	0.372266	0.92899	-0.301813
13	O35274	GPGGPLRSASPHR	6	2	0	0.42825	0.490457	0.0558	0.7913	34	0.003339	0.022377	-0.023487
14	P47853	IQAIELEDLLR	8	2	0	0.026639	0.476251	0.0558	0.7913	25	0.019604	0.004315	0.890141
15	P47853	VVQCSDLGLK	4	2	0	0.036029	0.533355	0.0558	0.7913	15	0.000623	0.00187	-0.321124
16	P47853	LGLGHNQIR	4	3	0	0.027176	0.569565	0.0558	0.7913	18	0.021069	0.005994	0.79849
17	P47853	EISPDTTLLDLQNNDISELRK	7	3	0	0.008151	0.266118	0.0558	0.7913	38	0.010144	0.007502	0.351587
18	P00762	LGEHNINVLEGDEQFINAAK	8	3	0	0.007839	0.289533	0.0558	0.7913	43	0.000356	0.000481	-0.318601
19	Q07936	SLYYFIQQDTK	8	2	0	0.032626	0.43648	0.0558	0.7913	16	0.044629	0.017934	0.835513
20	Q07936	AEDGSVIDYELIDQDAR	8	2	0	0.054831	0.353274	0.0558	0.7913	39	0.024854	0.040099	0.150502
21	Q07936	GVDEVTIVNILTNR	9	2	0	0.030279	0.425498	0.0558	0.7913	20	0.047192	0.015173	0.883131
22	Q00715	AM(15.9949)GIM(15.9949)NSFVNDIFER	9	2	0	0.045176	0.326739	0.0558	0.7913	27	0.012524	0.012348	-2.58556
23	P02466	GSPGEPGSAGPAGPP(15.9949)GLR	12	2	0	0.013981	0.412443	0.0558	0.7913	47	5.8e-05	0.000368	-1.50016
24	P02466	GQPGIAGALGEP(15.9949)GPLGIAGPP(15.9949)GAR	12	2	0	0.122295	0.287736	0.0558	0.7913	60	255.3	2.21044e+06	-552233
25	P02466	GENGIVGPTGPVGAAGPSGPNGPP(15.9949)GPAGSR	12	3	0	0.010507	0.234957	0.0558	0.7913	69	0.001141	0.00067	-0.90451
26	P02466	GLVGEP(15.9949)GPAGSKGETGNKGEP(15.9949)GSAGAQGPP(15.9949)GPSGEEGK	7	4	0	0.023747	0.146636	0.0558	0.7913	91	0.001004	0.002372	-0.239424
27	P02466	GRVGAP(15.9949)GPAGAR	7	2	0	0.022802	0.544718	0.0558	0.7913	33	0.000401	0.000608	-0.264484
28	P02466	GETGNKGEP(15.9949)GSAGAQGPP(15.9949)GPSGEEGKR	12	4	0	0.012958	0.249779	0.0558	0.7913	68	0.000104	0.000548	-1.34753
29	P02466	GP(15.9949)KGENGIVGPTGPVGAAGPSGP(15.9949)NGPP(15.9949)GPAGSR	5	3	0	0.077128	0.189831	0.0558	0.7913	75	0.195508	0.255194	-0.376222
30	P02466	GETGNKGEPGSAGAQGPP(15.9949)GPSGEEGKR	12	3	0	0.007255	0.255803	0.0558	0.7913	68	0.000172	0.00043	-0.140685
31	P02466	GVSAGPGPMGLMGPR	9	2	0	0.020971	0.427325	0.0558	0.7913	32	0.000531	0.001036	0.049698
32	P02466	GEAGAVGAP(15.9949)GSAGASGPGGLP(15.9949)GER	12	3	0	0.028814	0.327436	0.0558	0.7913	64	0.002393	0.001363	-1.47155
33	P02466	RGSP(15.9949)GEPGSAGP(15.9949)AGPP(15.9949)GLR	9	3	0	0.030395	0.361776	0.0558	0.7913	50	0.000684	0.001522	0.037478
34	P02466	RGSP(15.9949)GEP(15.9949)GSAGPAGPP(15.9949)GLR	12	2	0	0.026567	0.361776	0.0558	0.7913	50	7.3e-05	0.000902	-1.0271
35	P02466	GEPGAP(15.9949)GENGTP(15.9949)GQAGAR	11	2	0	0.020993	0.401356	0.0558	0.7913	50	8.1e-05	0.000779	-0.401748
36	P02466	TGEIGASGP(15.9949)P(15.9949)GFAGEK	12	2	0	0.018337	0.417823	0.0558	0.7913	36	0.003278	0.000978	0.698276
37	P02466	GYP(15.9949)GNIGPTGAAGAP(15.9949)GPHGSVGPAGK	12	3	0	0.011635	0.26834	0.0558	0.7913	58	0.000836	0.000494	0.001865
38	P02466	HGNRGEP(15.9949)GPAGSVGPVGAVGPR	12	4	0	0.019208	0.319176	0.0558	0.7913	53	0.002286	0.00098	0.466957
39	P02466	NSIAYLDEETGR	8	2	0	0.129165	0.475235	0.0558	0.7913	26	0.036816	0.044734	0.037337
40	P02466	GHNGLQGLP(15.9949)GLAGLHGDQGAP(15.9949)GPVGPAGPR	10	4	0	0.032186	0.202633	0.0558	0.7913	69	0.007275	0.004212	0.511076
41	P02466	GLVGEP(15.9949)GPAGSKGETGNK	12	2	0	0.028189	0.39614	0.0558	0.7913	36	7.3e-05	0.001113	-0.495242
42	P02466	GPNGDAGRP(15.9949)GEP(15.9949)GLM(15.9949)GPR	4	2	0	0.025745	0.347583	0.0558	0.7913	43	0.000531	0.000926	-0.751574
43	P02466	HGNRGEPGPAGSVGPVGAVGPR	12	4	0	0.013698	0.326872	0.0558	0.7913	53	0.001698	0.000814	0.452316
44	P02466	GETGNKGEP(15.9949)GSAGAQGPP(15.9949)GPSGEEGKR	12	3	0	0.012914	0.249779	0.0558	0.7913	68	0.000134	0.000528	-1.3909
45	P02466	GP(15.9949)KGENGIVGPTGPVGAAGPSGPNGPP(15.9949)GPAGSR	12	3	0	0.062857	0.194409	0.0558	0.7913	75	0.008252	0.008373	-0.463954
46	P02466	GAP(15.9949)GAIGAP(15.9949)GPAGASGDRGEAGAAGPSGPAGPR	12	4	0	0.010151	0.217665	0.0558	0.7913	93	5.8e-05	0.000525	-1.10416
47	P02466	GETGNKGEPGSAGAQGPP(15.9949)GPSGEEGKR	7	2	0	0.008413	0.255803	0.0558	0.7913	68	0.000256	0.000597	0.032082
48	P02466	EGIRGPRGDQGPVGR	6	3	0	0.057881	0.432338	0.0558	0.7913	37	0.003796	0.003457	0.317378
49	P02466	GSPGEP(15.9949)GSAGP(15.9949)AGPP(15.9949)GLR	11	2	0	0.024597	0.393248	0.0558	0.7913	47	0.000363	0.000682	-0.976868
50	P02466	SLNNQIETLLTPEGSR	8	2	0	0.234669	0.380642	0.0558	0.7913	32	0.350781	0.769598	-0.448437
51	P02466	GPSGEPGTTGPP(15.9949)GTAGPQGLLGAP(15.9949)GILGLP(15.9949)GSR	11	2	0	0.008888	0.180509	0.0558	0.7913	69	0.000378	0.000859	-0.012943
52	P02466	GYP(15.9949)GNIGPTGAAGAP(15.9949)GPHGSVGPAGK	12	2	0	0.008565	0.26834	0.0558	0.7913	58	0.001401	0.000457	0.557108
53	P02466	GAP(15.9949)GAIGAP(15.9949)GPAGASGDR	12	2	0	0.023586	0.426647	0.0558	0.7913	49	0.000142	0.000595	-1.38792
54	P02466	HGNRGEP(15.9949)GPAGSVGPVGAVGPR	12	3	0	0.01111	0.319176	0.0558	0.7913	53	0.002377	0.000522	0.732643
55	P02466	GENGIVGPTGPVGAAGPSGPNGP(15.9949)P(15.9949)GPAGSR	9	3	0	0.061102	0.229424	0.0558	0.7913	69	0.002484	0.005399	0.008055
56	P02466	GPAGPSGPIGKDGR	12	3	0	0.015422	0.499014	0.0558	0.7913	32	0.000752	0.000584	0.223279
57	P02466	SGHP(15.9949)GPVGPAGVR	12	3	0	0.009892	0.501737	0.0558	0.7913	30	0.001363	0.000312	0.688659
58	P02466	GEP(15.9949)GSAGAQGPP(15.9949)GPSGEEGKR	11	3	0	0.016898	0.339727	0.0558	0.7913	58	0.000523	0.0006	-0.329922
59	P02466	GETGNKGEP(15.9949)GSAGAQGPP(15.9949)GPSGEEGK	12	3	0	0.014502	0.271509	0.0558	0.7913	65	0.000287	0.000567	-0.95828
60	P02466	GENGIVGP(15.9949)TGPVGAAGPSGPNGPP(15.9949)GPAGSR	6	3	0	0.046306	0.229424	0.0558	0.7913	69	0.569531	0.305332	-13.1001
61	P02466	HGNRGEPGPAGSVGPVGAVGPR	12	3	0	0.00616	0.326872	0.0558	0.7913	53	0.001439	0.000344	0.622719
62	P02466	GLVGEPGPAGSKGETGNKGEPGSAGAQGPP(15.9949)GPSGEEGKR	6	4	0	0.011079	0.141485	0.0558	0.7913	94	0.0005	0.001138	-1.40019
63	P02466	GLVGEP(15.9949)GPAGSKGETGNKGEP(15.9949)GSAGAQGPP(15.9949)GPSGEEGKR	7	3	0	0.018044	0.1349	0.0558	0.7913	94	0.000134	0.001728	-0.765954
64	P02466	GETGLRGEIGNP(15.9949)GR	12	3	0	0.012992	0.457791	0.0558	0.7913	31	5.8e-05	0.000357	-1.35791
65	P02466	GVSAGPGPM(15.9949)GLMGPR	6	2	0	0.01869	0.417263	0.0558	0.7913	32	0.005521	0.001086	0.853493
66	P02466	EGPVGLPGIDGRPGP(15.9949)IGP(15.9949)AGPR	12	3	0	0.017513	0.294874	0.0558	0.7913	50	1.2e-05	0.000598	-2.08872
67	P02466	GEP(15.9949)GPAGSVGPVGAVGPR	12	2	0	0.011758	0.408879	0.0558	0.7913	42	0.001843	0.000385	0.698486
68	P02466	EGPVGLP(15.9949)GIDGR	12	2	0	0.013983	0.51049	0.0558	0.7913	25	0.000539	0.000362	-0.230894
69	P02466	GQPGIAGALGEPGP(15.9949)LGIAGP(15.9949)PGAR	4	2	0	0.165452	0.287736	0.0558	0.7913	60	7.3	4.01276e+07	-659048
70	P02466	GAP(15.9949)GAIGAP(15.9949)GPAGASGDRGEAGAAGPSGPAGPR	12	3	0	0.012309	0.217665	0.0558	0.7913	93	0.000104	0.000565	-1.51937
71	P02466	GQPGIAGALGEPGPLGIAGP(15.9949)P(15.9949)GAR	4	3	0	0.008714	0.287736	0.0558	0.7913	60	4095.3	1.99876e+07	-27.6294
72	P02466	GPNGDAGRP(15.9949)GEP(15.9949)GLMGPR	12	3	0	0.053994	0.355965	0.0558	0.7913	43	0.000531	0.00275	-0.127339
73	P02466	SGHPGPVGPAGVR	12	3	0	0.008858	0.513836	0.0558	0.7913	30	0.001103	0.000331	0.65031
74	P02466	HGNRGEP(15.9949)GPAGSVGPVGAVGPR	6	2	0	0.032063	0.319176	0.0558	0.7913	53	0.013104	0.003318	0.853898
75	P02466	GPAGPSGPIGKDGR	12	2	0	0.027455	0.499014	0.0558	0.7913	32	0.000661	0.000884	-0.195221
76	P02466	FTYTVLVDGCSK	10	2	0	0.07909	0.445891	0.0558	0.7913	12	0.170117	0.170526	-2.871
77	P02466	SGHP(15.9949)GPVGPAGVR	12	2	0	0.011239	0.501737	0.0558	0.7913	30	0.001126	0.000324	0.54162
78	P02466	GEAGNIGFP(15.9949)GPK	12	2	0	0.01224	0.507938	0.0558	0.7913	25	0.000272	0.000318	-0.691985
79	P02466	GEAGAAGPSGPAGPR	12	2	0	0.01562	0.508961	0.0558	0.7913	44	0.002736	0.000536	0.529992
80	P02466	GSP(15.9949)GEP(15.9949)GSAGPAGPP(15.9949)GLR	12	2	0	0.024358	0.393248	0.0558	0.7913	47	0.000134	0.000653	-1.57044
81	P02466	HGNRGEPGPAGSVGPVGAVGPR	11	2	0	0.025996	0.326872	0.0558	0.7913	53	0.000394	0.000981	-0.706088
82	P02466	GENGIVGPTGPVGAAGPSGP(15.9949)NGPP(15.9949)GPAGSR	4	3	0	0.167961	0.229424	0.0558	0.7913	69	1.8	30.7365	-1.63212
83	P02466	GLP(15.9949)GEFGLP(15.9949)GP(15.9949)AGPR	4	3	0	0.086808	0.406839	0.0558	0.7913	34	1.2e-05	0.003468	-0.987981
84	P02466	GETGLRGEIGNP(15.9949)GR	12	2	0	0.015384	0.457791	0.0558	0.7913	31	8.9e-05	0.000399	-1.52602
85	P02466	DGNP(15.9949)GSDGPP(15.9949)GRDGQP(15.9949)GHKGER	4	3	0	0.026977	0.290601	0.0558	0.7913	53	0.000562	0.001507	-0.273468
86	P02466	TGEIGASGPP(15.9949)GFAGEK	12	2	0	0.014455	0.427899	0.0558	0.7913	36	0.000241	0.000405	-0.832746
87	P02466	GLP(15.9949)GEFGLP(15.9949)GP(15.9949)AGPRGER	6	3	0	0.08689	0.3406	0.0558	0.7913	43	0.003644	0.006244	0.01445
88	P02466	GQPGIAGALGEPGPLGIAGPP(15.9949)GAR	12	3	0	0.125414	0.294675	0.0558	0.7913	60	255.3	2.20747e+06	-2.40141e+06
89	P02466	GAP(15.9949)GAIGAP(15.9949)GPAGASGDRGEAGAAGPSGPAGPR	9	2	0	0.012309	0.217665	0.0558	0.7913	93	0.000943	0.000968	0.21635
90	P02466	AGVMGPP(15.9949)GNR	10	2	0	0.095581	0.556429	0.0558	0.7913	22	0.008954	0.006318	-0.332889
91	P02466	GP(15.9949)KGENGIVGPTGPVGAAGPSGPNGP(15.9949)P(15.9949)GPAGSR	7	3	0	0.108799	0.189831	0.0558	0.7913	75	1.3625	8.30903	-1.35948
92	P02466	GSPGEPGSAGPAGP(15.9949)PGLRGSP(15.9949)GSR	4	3	0	0.050883	0.303059	0.0558	0.7913	62	0.003384	0.004048	-0.075854
93	P02466	SGHPGPVGPAGVR	10	2	0	0.011418	0.513836	0.0558	0.7913	30	0.001851	0.000439	0.472548
94	P02466	GPAGPSGPIGK	11	2	0	0.008135	0.589503	0.0558	0.7913	24	0.000745	0.00021	0.559429
95	P02466	GLP(15.9949)GERGRVGAP(15.9949)GPAGAR	6	3	0	0.037822	0.378718	0.0558	0.7913	48	0.000317	0.001612	-0.272928
96	P02466	GEAGNIGFP(15.9949)GP(15.9949)K	11	2	0	0.010748	0.495978	0.0558	0.7913	25	0.002644	0.000538	0.745098
97	P02466	GQPGIAGALGEP(15.9949)GPLGIAGPP(15.9949)GAR	12	3	0	0.12235	0.287736	0.0558	0.7913	60	255.3	2.20777e+06	-157679
98	P02466	GETGNKGEP(15.9949)GSAGAQGP(15.9949)P(15.9949)GPSGEEGKR	4	4	0	0.011535	0.243898	0.0558	0.7913	68	0.003354	0.000901	0.826577
99	P02466	GAPGP(15.9949)DGNNGAQGP(15.9949)P(15.9949)GPQGVQGGK	5	2	0	0.050408	0.295218	0.0558	0.7913	58	0.000272	0.00291	-0.221908
100	P02466	GEQGPAGPP(15.9949)GFQGLP(15.9949)GPSGTAGEVGKP(15.9949)GER	5	2	0	0.026266	0.196224	0.0558	0.7913	72	0.000165	0.001925	-0.644619
101	P02466	GELGPVGNP(15.9949)GPAGPAGPR	12	2	0	0.00966	0.39847	0.0558	0.7913	44	0.00034	0.000288	-0.260314
102	P02466	P(15.9949)GPIGPAGPR	12	2	0	0.017163	0.576255	0.0558	0.7913	25	0.000256	0.000392	-0.905811
103	P02466	EGPVGLP(15.9949)GIDGRPGPIGP(15.9949)AGPR	11	2	0	0.012266	0.294874	0.0558	0.7913	50	0.000371	0.000438	-0.717519
104	P02466	GLP(15.9949)GEFGLP(15.9949)GP(15.9949)AGPR	12	2	0	0.027241	0.406839	0.0558	0.7913	34	0.000439	0.000775	-1.06283
105	P02466	GDGGP(15.9949)P(15.9949)GMTGFP(15.9949)GAAGR	10	2	0	0.094327	0.389543	0.0558	0.7913	37	0.00047	0.003656	-0.630419
106	P02466	GPSGEPGTTGPP(15.9949)GTAGPQGLLGAP(15.9949)GILGLP(15.9949)GSR	6	4	0	0.011957	0.180509	0.0558	0.7913	69	0.000775	0.000945	-0.152261
107	P02466	GQPGIAGALGEP(15.9949)GPLGIAGP(15.9949)PGAR	6	2	0	0.123497	0.287736	0.0558	0.7913	60	255.3	2.43749e+06	-89.5965
108	P02466	GSP(15.9949)GERGEVGPAGPNGFAGP(15.9949)AGSAGQP(15.9949)GAK	10	3	0	0.020659	0.217799	0.0558	0.7913	77	0.001019	0.001632	0.071773
109	P02466	GQPGIAGALGEPGPLGIAGP(15.9949)PGAR	11	2	0	0.123197	0.294675	0.0558	0.7913	60	255.3	2.19886e+06	-202.448
110	P02466	GQPGIAGALGEPGPLGIAGPP(15.9949)GAR	12	2	0	0.123367	0.294675	0.0558	0.7913	60	255.3	2.18226e+06	-902.138
111	P02466	GSP(15.9949)GEPGSAGP(15.9949)AGPP(15.9949)GLR	11	2	0	0.02455	0.393248	0.0558	0.7913	47	0.00015	0.000681	-1.38973
112	P02466	GEPGPAGSVGPVGAVGPR	12	2	0	0.004374	0.418739	0.0558	0.7913	42	0.000592	0.00016	0.65698
113	P02466	GEVGPAGPNGFAGP(15.9949)AGSAGQP(15.9949)GAKGEK	11	3	0	0.080938	0.256179	0.0558	0.7913	67	0.001355	0.005849	-0.034626
114	P02466	GP(15.9949)KGENGIVGPTGPVGAAGP(15.9949)SGPNGPP(15.9949)GPAGSR	11	3	0	0.079765	0.189831	0.0558	0.7913	75	0.150586	0.18723	-2.97064
115	P02466	GP(15.9949)KGENGIVGPTGPVGAAGPSGPNGP(15.9949)PGPAGSR	11	4	0	0.018646	0.194409	0.0558	0.7913	75	0.00015	0.001609	-0.040905
116	Q9EQP5	ECYCPPDFPSALYCDSR	6	3	0	0.019533	0.291276	0.0558	0.7913	35	0.014966	0.015561	-1.2214
117	Q9EQP5	NQLEEVPSALPR	9	2	0	0.0179	0.471646	0.0558	0.7913	31	0.014676	0.001322	0.955001
118	Q9EQP5	WINLDNNR	4	2	0	0.021433	0.556492	0.0558	0.7913	13	0.009625	0.006974	0.477579
119	Q9EQP5	ECYCPPDFPSALYCDSR	10	2	0	0.017195	0.291276	0.0558	0.7913	35	0.021619	0.00393	0.850297
120	P05539	GAQGP(15.9949)P(15.9949)GATGFP(15.9949)GAAGR	12	2	0	0.024021	0.409433	0.0558	0.7913	44	0.002759	0.001152	0.541725
121	P05539	GFTGLQGLP(15.9949)GP(15.9949)P(15.9949)GPSGDQGTSGPAGPSGPR	11	3	0	0.016724	0.206345	0.0558	0.7913	66	0.000851	0.001346	-0.335415
122	P05539	GAQGPP(15.9949)GATGFP(15.9949)GAAGR	5	3	0	0.115971	0.419306	0.0558	0.7913	44	0.00018	0.003619	-1.33412
123	P05539	GAQGPP(15.9949)GATGFP(15.9949)GAAGR	12	2	0	0.02076	0.419306	0.0558	0.7913	44	2e-05	0.000519	-1.96879
124	P35444	DTDLDGFPDEKLR	5	3	0	0.022811	0.431337	0.0558	0.7913	22	0.101025	0.022217	0.978933
125	P35444	GSFQCGPCQPGFVGDQR	6	3	0	0.03216	0.341892	0.0558	0.7913	38	0.069287	0.0311	0.721537
126	P35444	DTDLDGFPDEKLR	5	2	0	0.024494	0.431337	0.0558	0.7913	22	0.050488	0.0234	0.975455
127	P35444	SCVCAVGWAGNGLLCGR	4	3	0	0.004212	0.35177	0.0558	0.7913	31	0.045544	0.004599	0.998876
128	P35444	GSFQCGPCQPGFVGDQR	8	2	0	0.026629	0.341892	0.0558	0.7913	38	0.08418	0.021058	0.907625
129	P35444	SCVCAVGWAGNGLLCGR	9	2	0	0.043911	0.35177	0.0558	0.7913	31	0.092969	0.042417	0.568926
130	P35444	NALWHTGDTASQVR	4	3	0	0.028813	0.421847	0.0558	0.7913	28	0.098828	0.026024	0.953393
131	P35444	VPNFDQSDSDGDGVGDACDNCPQKDNPDQR	6	3	0	0.010544	0.169726	0.0558	0.7913	64	0.075635	0.018815	0.719563
132	P35444	DTDLDGFPDEK	11	2	0	0.041262	0.504072	0.0558	0.7913	18	0.080518	0.02894	0.911517
133	P35444	ELQETNAALQDVR	11	2	0	0.020436	0.448623	0.0558	0.7913	33	0.093945	0.015119	0.976906
134	contaminant_KERATIN03	SKELTTEIDNNIEQISSYK	4	3	0	0.149738	0.296445	0.0558	0.7913	35	0.002576	0.009408	-0.581549
135	contaminant_KERATIN03	AETECQNTEYQQLLDIK	4	3	0	0.00667	0.316458	0.0558	0.7913	37	0.004559	0.002187	0.424381
136	contaminant_KERATIN03	AETECQNTEYQQLLDIK	7	2	0	0.010963	0.316458	0.0558	0.7913	37	0.007214	0.003157	-0.034759
137	contaminant_KERATIN02	QGVDADINGLR	6	2	0	0.070675	0.537179	0.0558	0.7913	23	0.012463	0.015386	-1.03508
138	contaminant_KERATIN02	EIETYHNLLEGGQEDFESSGAGK	10	3	0	0.016053	0.250006	0.0558	0.7913	52	0.001187	0.001131	0.206345
139	contaminant_KERATIN02	GGGGSFGYSYGGGSGGGFSASSLGGGFGGGSR	10	3	0	0.019954	0.223036	0.0558	0.7913	63	0.001324	0.001679	0.139938
140	P49744	CGPCKPGYTGDQTR	11	3	0	0.21951	0.412496	0.0558	0.7913	25	0.011609	0.024201	0.084724
141	P49744	QTEQTYWQATPFR	8	2	0	0.023319	0.38377	0.0558	0.7913	27	0.071729	0.0159	0.832963
142	P49744	NPEQNPCSVHAQCIEER	5	3	0	0.029638	0.323241	0.0558	0.7913	46	0.059155	0.026279	-1.07239
143	P49744	DVDIDSYPDEELPCSAR	8	2	0	0.014385	0.336914	0.0558	0.7913	37	0.068066	0.014319	0.867074
144	contaminant_IGA3_HAEIN	KDASIRSEFPQNR	7	2	0	0.009598	0.426539	0.0558	0.7913	32	0.00784	0.00073	0.974575
145	P07335	LAVEALSSLDGDLSGR	5	2	0	0.066528	0.41782	0.0558	0.7913	34	0.074292	0.043429	0.661712
146	P04937	STTPDITGYR	6	2	0	0.116927	0.543121	0.0558	0.7913	15	0.061963	0.06766	0.438954
147	P04937	TVLVTWTPPR	6	2	0	0.025774	0.500051	0.0558	0.7913	11	0.008466	0.002289	0.744787
148	P04937	ATGVFTTLQPLR	10	2	0	0.024822	0.47153	0.0558	0.7913	19	0.099927	0.023162	0.933111
149	P04937	SSPVVIDASTAIDAPSNLR	6	2	0	0.041803	0.349324	0.0558	0.7913	41	0.114453	0.050334	0.723733
150	P04937	APITGYIIR	8	2	0	0.03537	0.552966	0.0558	0.7913	16	0.076489	0.02404	0.828054
151	P31000	EM(15.9949)EENFALEAANYQDTIGR	6	2	0	0.018802	0.278414	0.0558	0.7913	47	0.035596	0.017974	0.572235
152	P31000	LGDLYEEEMR	7	2	0	0.035454	0.48064	0.0558	0.7913	22	0.075391	0.023007	0.849876
153	P31000	VEVERDNLAEDIMR	4	3	0	0.042761	0.385489	0.0558	0.7913	32	0.040479	0.033684	0.481575
154	P31000	QVQSLTCEVDALK	4	2	0	0.041801	0.437872	0.0558	0.7913	25	0.108594	0.04204	0.735712
155	P31000	EM(15.9949)EENFALEAANYQDTIGR	7	3	0	0.024644	0.278414	0.0558	0.7913	47	0.035718	0.021773	0.537381
156	P31000	ILLAELEQLK	5	2	0	0.03229	0.506912	0.0558	0.7913	20	0.056714	0.016662	0.90018
157	P31000	FADLSEAANR	8	2	0	0.050023	0.548457	0.0558	0.7913	27	0.037732	0.014065	0.750305
158	P31000	ILLAELEQLKGQGK	8	3	0	0.026553	0.415096	0.0558	0.7913	28	0.065869	0.014308	0.900349
159	P13941	GPP(15.9949)GTAGTP(15.9949)GLR	8	2	0	0.098352	0.523508	0.0558	0.7913	24	0.111035	0.091737	0.131819
160	P13941	GSP(15.9949)GGP(15.9949)GAAGFP(15.9949)GGR	10	2	0	0.046549	0.465695	0.0558	0.7913	37	0.006207	0.00281	0.297525
161	P13941	GP(15.9949)PGAQGPP(15.9949)GSP(15.9949)GPLGIAGLTGAR	12	3	0	0.02938	0.287245	0.0558	0.7913	56	0.001614	0.001595	0.027361
162	P13941	GGPGPAGPRGVAGEPGR	7	2	0	0.054938	0.441415	0.0558	0.7913	44	0.002621	0.002602	-0.288535
163	P13941	GPAGPNGAP(15.9949)GEKGPAGER	6	3	0	0.173069	0.403962	0.0558	0.7913	48	0.027295	0.044684	-0.513904
164	P13941	GVAGEP(15.9949)GRDGTP(15.9949)GGP(15.9949)GIR	7	3	0	0.040868	0.379531	0.0558	0.7913	41	0.003674	0.008216	-0.000548
165	P13941	GLAGPP(15.9949)GMP(15.9949)GPR	8	2	0	0.041777	0.488878	0.0558	0.7913	28	0.000668	0.00138	-0.385328
166	P14668	VLTEIIASR	8	2	0	0.114565	0.568905	0.0558	0.7913	17	0.05	0.050204	0.314922
167	P02454	DGLNGLP(15.9949)GPIGP(15.9949)P(15.9949)GPR	4	3	0	0.078642	0.393152	0.0558	0.7913	33	0.013196	0.008254	-2.95098
168	P02454	GAAGP(15.9949)P(15.9949)GATGFP(15.9949)GAAGR	11	2	0	0.018769	0.421131	0.0558	0.7913	44	0.001752	0.000605	0.280555
169	P02454	GLTGPIGP(15.9949)P(15.9949)GPAGAPGDKGETGPSGPAGPTGAR	4	3	0	0.012913	0.195374	0.0558	0.7913	74	1.2e-05	0.000742	-2.07243
170	P02454	GAAGLP(15.9949)GPKGDRGDAGPK	12	3	0	0.012225	0.400472	0.0558	0.7913	41	0.000424	0.000364	-0.295322
171	P02454	GANGAP(15.9949)GIAGAP(15.9949)GFP(15.9949)GAR	12	2	0	0.113323	0.390279	0.0558	0.7913	47	0.000439	0.005287	-0.042717
172	P02454	GVP(15.9949)GPP(15.9949)GAVGPAGK	12	2	0	0.02186	0.489893	0.0558	0.7913	30	0.000119	0.000523	-1.6395
173	P02454	QGPSGASGERGPP(15.9949)GPM(15.9949)GPPGLAGPPGESGR	4	3	0	0.022722	0.206547	0.0558	0.7913	78	0.001065	0.002134	0.187203
174	P02454	GPP(15.9949)GPMGPPGLAGPPGESGR	12	2	0	0.022545	0.343652	0.0558	0.7913	48	0.000928	0.000952	-0.076619
175	P02454	GEPGPSGLP(15.9949)GP(15.9949)P(15.9949)GER	12	2	0	0.027141	0.42691	0.0558	0.7913	38	0.000264	0.000697	-1.37103
176	P02454	GEP(15.9949)GPSGLP(15.9949)GPP(15.9949)GER	12	2	0	0.027141	0.42691	0.0558	0.7913	38	0.000264	0.000697	-1.37103
177	P02454	GDRGDAGPKGADGSP(15.9949)GKDGVR	6	3	0	0.013145	0.344113	0.0558	0.7913	46	0.000691	0.00058	0.280489
178	P02454	GPSGPQGPSGAP(15.9949)GP(15.9949)KGNSGEPGAP(15.9949)GNKGDTGAK	12	4	0	0.046402	0.194375	0.0558	0.7913	76	0.000287	0.004115	-0.006183
179	P02454	GEP(15.9949)GPAGVQGPP(15.9949)GPAGEEGK	11	2	0	0.010463	0.354986	0.0558	0.7913	52	0.002576	0.000562	0.708865
180	P02454	EDLDCPNPQKR	7	2	0	0.053174	0.473642	0.0558	0.7913	25	0.025952	0.011155	0.407612
181	P02454	GETGPAGPAGPIGPAGAR	10	2	0	0.005382	0.428106	0.0558	0.7913	47	0.001	0.000201	0.806928
182	P02454	NGDRGETGPAGPAGPIGPAGAR	12	2	0	0.004996	0.342538	0.0558	0.7913	57	0.001263	0.000238	0.813186
183	P02454	GVQGPP(15.9949)GPAGPR	12	2	0	0.015316	0.529554	0.0558	0.7913	31	0.000546	0.00036	-0.167685
184	P02454	GAAGLP(15.9949)GP(15.9949)KGDRGDAGPK	11	3	0	0.111219	0.391042	0.0558	0.7913	41	0.011975	0.009818	-0.475638
185	P02454	GLP(15.9949)GTAGLP(15.9949)GM(15.9949)KGHR	12	3	0	0.030551	0.396192	0.0558	0.7913	29	8.9e-05	0.000933	-1.79285
186	P02454	GP(15.9949)SGPQGPSGAP(15.9949)GPK	12	2	0	0.023282	0.465978	0.0558	0.7913	37	0.000378	0.000603	-0.780231
187	P02454	DGEAGAQGAP(15.9949)GPAGPAGER	12	2	0	0.010154	0.401085	0.0558	0.7913	57	0.00089	0.000295	0.430736
188	P02454	GFSGLQGPPGSP(15.9949)GSP(15.9949)GEQGPSGASGPAGPR	12	3	0	0.177935	0.220881	0.0558	0.7913	76	0.133984	0.317	-0.0417
189	P02454	GPP(15.9949)GPMGPPGLAGP(15.9949)PGESGR	5	2	0	0.019081	0.33556	0.0558	0.7913	48	0.000195	0.000705	-1.05838
190	P02454	GFP(15.9949)GADGVAGP(15.9949)KGPAGER	12	3	0	0.029662	0.379668	0.0558	0.7913	43	0.000378	0.00096	-0.85511
191	P02454	GQAGVMGFP(15.9949)GP(15.9949)KGTAGEP(15.9949)GK	9	2	0	0.043991	0.31621	0.0558	0.7913	41	0.001309	0.002441	-0.677069
192	P02454	GQAGVMGFP(15.9949)GP(15.9949)KGTAGEPGK	10	3	0	0.033188	0.323835	0.0558	0.7913	41	0.000485	0.001721	-0.191718
193	P02454	GARGEP(15.9949)GPSGLP(15.9949)GPP(15.9949)GER	12	3	0	0.026096	0.367144	0.0558	0.7913	47	0.000241	0.000784	-1.24025
194	P02454	GAAGLP(15.9949)GP(15.9949)KGDRGDAGP(15.9949)K	5	2	0	0.110212	0.381834	0.0558	0.7913	41	0.008008	0.026986	-0.219382
195	P02454	GPP(15.9949)GPP(15.9949)GKNGDDGEAGKPGRP(15.9949)GER	5	4	0	0.198862	0.265991	0.0558	0.7913	58	0.09248	0.233551	-0.170455
196	P02454	QGPSGASGERGPP(15.9949)GPMGPP(15.9949)GLAGPP(15.9949)GESGR	12	3	0	0.0157	0.201684	0.0558	0.7913	78	0.000592	0.001366	0.011429
197	P02454	GFP(15.9949)GERGVQGPP(15.9949)GPAGPR	4	3	0	0.044876	0.356159	0.0558	0.7913	45	0.01521	0.006869	0.662712
198	P02454	GFSGLQGPP(15.9949)GSP(15.9949)GSPGEQGPSGASGPAGPR	12	3	0	0.009242	0.220881	0.0558	0.7913	76	0.000409	0.00044	-0.543288
199	P02454	GEPGP(15.9949)AGVQGPP(15.9949)GPAGEEGKR	12	3	0	0.013334	0.326576	0.0558	0.7913	56	0.000851	0.000449	0.041344
200	P02454	GNSGEPGAP(15.9949)GNKGDTGAKGEPGPAGVQGPP(15.9949)GPAGEEGK	4	4	0	0.016506	0.151647	0.0558	0.7913	91	0.000302	0.002096	-0.111236
201	P02454	SAGVSVPGPMGPSGPR	12	2	0	0.006242	0.430364	0.0558	0.7913	36	0.001172	0.000282	0.749843
202	P02454	GEPGSP(15.9949)GENGAP(15.9949)GQM(15.9949)GPR	12	2	0	0.022745	0.360234	0.0558	0.7913	48	4.3e-05	0.000671	-1.74583
203	P02454	GAAGLP(15.9949)GP(15.9949)KGDR	10	2	0	0.032745	0.521592	0.0558	0.7913	28	0.000363	0.000841	-0.931404
204	P02454	GAAGLP(15.9949)GP(15.9949)KGDRGDAGPK	11	2	0	0.158816	0.391042	0.0558	0.7913	41	0.086133	0.113582	-0.636074
205	P02454	GLP(15.9949)GTAGLP(15.9949)GM(15.9949)KGHR	6	2	0	0.028673	0.396192	0.0558	0.7913	29	0.001111	0.001623	0.079481
206	P02454	GLTGPIGPP(15.9949)GPAGAP(15.9949)GDKGETGPSGPAGPTGAR	12	2	0	0.009178	0.195374	0.0558	0.7913	74	0.001172	0.000855	0.263191
207	P02454	GDTGAKGEP(15.9949)GP(15.9949)AGVQGPP(15.9949)GPAGEEGKR	12	4	0	0.012505	0.241156	0.0558	0.7913	66	0.002087	0.000817	0.511486
208	P02454	NGDRGETGPAGP(15.9949)AGPIGPAGAR	12	3	0	0.012227	0.334472	0.0558	0.7913	57	0.000333	0.000463	-0.363023
209	P02454	GPSGPQGPSGAP(15.9949)GPK	12	2	0	0.011475	0.477215	0.0558	0.7913	37	0.00031	0.000279	-0.434841
210	P02454	GDTGAKGEP(15.9949)GPAGVQGPP(15.9949)GPAGEEGKR	10	4	0	0.009079	0.246971	0.0558	0.7913	66	0.000974	0.000516	0.169484
211	P02454	GNDGAVGAAGPP(15.9949)GPTGPTGPP(15.9949)GFP(15.9949)GAAGAK	12	2	0	0.003613	0.227582	0.0558	0.7913	68	0.000264	0.000188	-0.036276
212	P02454	GDRGDAGP(15.9949)KGADGSP(15.9949)GKDGVR	5	3	0	0.016588	0.33601	0.0558	0.7913	46	0.001027	0.000743	0.398939
213	P02454	GLTGPIGPP(15.9949)GPAGAPGDK	12	2	0	0.031644	0.402877	0.0558	0.7913	38	0.003308	0.001331	-1.80095
214	P02454	GEPGP(15.9949)AGVQGPP(15.9949)GPAGEEGK	11	3	0	0.08625	0.354986	0.0558	0.7913	52	0.009839	0.007347	-0.247096
215	P02454	GADGSP(15.9949)GKDGVR	4	2	0	0.030723	0.542228	0.0558	0.7913	26	0.000111	0.000952	-1.05473
216	P02454	GPAGPQGP(15.9949)RGDKGETGEQGDR	8	4	0	0.029039	0.326456	0.0558	0.7913	53	0.000928	0.001631	-0.16093
217	P02454	EGECCPFCPEEYVSPDAEVIGVEGPKGDPGPQGPR	7	4	0	0.012333	0.115732	0.0558	0.7913	81	0.012402	0.003877	0.607278
218	P02454	GPPGP(15.9949)MGPPGLAGPPGESGR	8	3	0	0.016551	0.343652	0.0558	0.7913	48	0.000806	0.00084	0.209052
219	P02454	GDTGPAGPKGEP(15.9949)GSP(15.9949)GENGAP(15.9949)GQMGPR	12	3	0	0.018877	0.234272	0.0558	0.7913	66	0.000317	0.000817	-1.27155
220	P02454	GLTGPIGPP(15.9949)GPAGAPGDKGETGPSGPAGPTGAR	12	3	0	0.007059	0.200085	0.0558	0.7913	74	0.000409	0.000372	-0.398769
221	P02454	GFSGLQGPP(15.9949)GSP(15.9949)GSPGEQGPSGASGPAGPR	12	2	0	0.009844	0.220881	0.0558	0.7913	76	0.001523	0.000743	0.440671
222	P02454	GLTGPIGP(15.9949)P(15.9949)GPAGAP(15.9949)GDKGETGPSGPAGPTGAR	11	4	0	0.1319	0.190774	0.0558	0.7913	74	0.000226	0.011248	-0.129466
223	P02454	GP(15.9949)AGPQGP(15.9949)RGDKGETGEQGDR	6	3	0	0.014373	0.318769	0.0558	0.7913	53	0.001469	0.000745	0.578299
224	P02454	GFSGLDGAKGDTGPAGPK	12	3	0	0.016328	0.403664	0.0558	0.7913	34	0.000493	0.000802	0.071792
225	P02454	GEPGDTGVKGDAGPP(15.9949)GPAGPAGPP(15.9949)GPIGNVGAP(15.9949)GPK	6	2	0	0.022299	0.162847	0.0558	0.7913	80	0.001065	0.002196	-0.140678
226	P02454	GDTGAKGEP(15.9949)GP(15.9949)AGVQGPP(15.9949)GPAGEEGKR	5	3	0	0.091108	0.241156	0.0558	0.7913	66	0.013623	0.011484	-10.0288
227	P02454	GEPGP(15.9949)AGVQGP(15.9949)P(15.9949)GPAGEEGKR	12	3	0	0.030773	0.318887	0.0558	0.7913	56	0.003705	0.001456	0.448616
228	P02454	GQAGVMGFP(15.9949)GPK	12	2	0	0.019039	0.484948	0.0558	0.7913	24	0.000111	0.000506	-1.6565
229	P02454	GFP(15.9949)GLP(15.9949)GPSGEP(15.9949)GKQGPSGASGER	12	3	0	0.016089	0.270565	0.0558	0.7913	58	0.002026	0.000914	-1.10108
230	P02454	GDTGAKGEP(15.9949)GPAGVQGPP(15.9949)GPAGEEGKR	12	3	0	0.016354	0.246971	0.0558	0.7913	66	0.000882	0.000863	-0.140277
231	P02454	SAGVSVPGP(15.9949)MGPSGPR	10	2	0	0.012376	0.42023	0.0558	0.7913	36	0.000516	0.000482	0.099638
232	P02454	GDTGPAGP(15.9949)KGEPGSP(15.9949)GENGAP(15.9949)GQMGPR	6	2	0	0.035474	0.234272	0.0558	0.7913	66	0.000165	0.002422	-0.278986
233	P02454	DGLNGLP(15.9949)GPIGPP(15.9949)GPR	12	2	0	0.02259	0.402632	0.0558	0.7913	33	0.001553	0.000765	0.162901
234	P02454	GEP(15.9949)GPAGVQGPP(15.9949)GPAGEEGKR	11	2	0	0.020822	0.326576	0.0558	0.7913	56	0.000729	0.000735	-0.388211
235	P02454	GPSGPQGPSGAP(15.9949)GP(15.9949)K	12	2	0	0.023282	0.465978	0.0558	0.7913	37	0.000378	0.000603	-0.780231
236	P02454	GDRGETGPAGPP(15.9949)GAPGAP(15.9949)GAPGPVGPAGK	6	3	0	0.035274	0.243301	0.0558	0.7913	72	0.000714	0.002633	0.015177
237	P02454	EGECCPFCPEEYVSPDAEVIGVEGP(15.9949)KGDPGPQGPR	4	3	0	0.009642	0.113007	0.0558	0.7913	81	0.076123	0.028157	0.592504
238	P02454	GVQGP(15.9949)P(15.9949)GPAGPR	11	2	0	0.074174	0.517085	0.0558	0.7913	31	0.011639	0.006022	0.542207
239	P02454	GFSGLQGPP(15.9949)GSPGSP(15.9949)GEQGPSGASGPAGPR	12	3	0	0.009242	0.220881	0.0558	0.7913	76	0.000409	0.00044	-0.543288
240	P02454	GETGPSGPAGPTGAR	12	2	0	0.010531	0.495459	0.0558	0.7913	36	0.000752	0.00039	0.404927
241	P02454	GPAGPQGP(15.9949)RGDKGETGEQGDR	8	3	0	0.007811	0.326456	0.0558	0.7913	53	0.000851	0.000404	0.549619
242	P02454	NGDRGETGPAGPAGPIGPAGAR	12	4	0	0.037507	0.342538	0.0558	0.7913	57	0.000897	0.001612	-0.231718
243	P02454	EGECCPFCPEEYVSPDAEVIGVEGPKGDPGPQGPR	6	3	0	0.003993	0.115732	0.0558	0.7913	81	0.02229	0.003557	0.844281
244	P02454	DGLNGLP(15.9949)GPIGPPGP(15.9949)R	10	2	0	0.102547	0.402632	0.0558	0.7913	33	0.000989	0.005433	0.005873
245	P02454	GLTGPIGP(15.9949)P(15.9949)GPAGAP(15.9949)GDKGETGPSGPAGPTGAR	12	3	0	0.012662	0.190774	0.0558	0.7913	74	0.000424	0.000686	-0.89301
246	P02454	GPAGPQGPRGDKGETGEQGDR	8	3	0	0.012108	0.334328	0.0558	0.7913	53	0.000989	0.000699	0.326887
247	P02454	GEPGPPGP(15.9949)AGFAGPP(15.9949)GADGQPGAK	6	3	0	0.024365	0.291684	0.0558	0.7913	61	0.00311	0.001758	0.458129
248	P02454	GLTGPIGP(15.9949)P(15.9949)GPAGAP(15.9949)GDK	8	2	0	0.031429	0.384128	0.0558	0.7913	38	0.001416	0.001719	-0.013817
249	P02454	QGPSGASGERGPP(15.9949)GP(15.9949)MGPP(15.9949)GLAGPPGESGR	6	3	0	0.021055	0.201684	0.0558	0.7913	78	0.003644	0.001814	-1.33342
250	P02454	GFP(15.9949)GLP(15.9949)GPSGEPGKQGPSGASGER	12	3	0	0.013226	0.277089	0.0558	0.7913	58	0.000485	0.000602	-0.321542
251	P02454	GPP(15.9949)GPM(15.9949)GPPGLAGPPGESGR	11	2	0	0.022728	0.33556	0.0558	0.7913	48	0.003247	0.001403	0.071293
252	P02454	GEPGPAGVQGP(15.9949)P(15.9949)GPAGEEGKR	11	3	0	0.013249	0.326576	0.0558	0.7913	56	0.000867	0.000463	0.115622
253	P02454	GAAGPP(15.9949)GATGFP(15.9949)GAAGR	12	2	0	0.020599	0.431286	0.0558	0.7913	44	0.000264	0.000504	-1.15846
254	P02454	EGECCPFCPEEYVSPDAEVIGVEGPK	10	3	0	0.016912	0.185997	0.0558	0.7913	58	0.020581	0.004552	0.618013
255	P02454	QGPSGASGERGPP(15.9949)GPMGPP(15.9949)GLAGPPGESGR	5	3	0	0.016038	0.206547	0.0558	0.7913	78	0.00372	0.001573	0.744309
256	P02454	GFSGLQGPP(15.9949)GSP(15.9949)GSP(15.9949)GEQGPSGASGPAGPR	12	2	0	0.008372	0.21568	0.0558	0.7913	76	0.002103	0.000517	-0.687355
257	P02454	DGEAGAQGAPGPAGPAGER	11	2	0	0.008699	0.410757	0.0558	0.7913	57	0.001607	0.00041	0.721297
258	P02454	GFSGLQGPP(15.9949)GSPGSPGEQGPSGASGPAGPR	8	3	0	0.014153	0.226207	0.0558	0.7913	76	0.001569	0.001136	0.386076
259	P02454	GPSGPQGPSGAP(15.9949)GP(15.9949)KGNSGEPGAP(15.9949)GNK	12	3	0	0.019646	0.257027	0.0558	0.7913	65	0.000104	0.000943	-0.855242
260	P02454	GDRGETGPAGPP(15.9949)GAP(15.9949)GAPGAP(15.9949)GPVGPAGK	11	3	0	0.013037	0.237572	0.0558	0.7913	72	0.000455	0.000632	-0.496716
261	P02454	GFSGLDGAK	12	2	0	0.012841	0.620705	0.0558	0.7913	16	0.000493	0.000468	-0.022914
262	P02454	SLSQQIENIR	7	2	0	0.138721	0.525427	0.0558	0.7913	25	0.12373	0.136171	-0.866557
263	P02454	GDTGP(15.9949)AGPKGEPGSP(15.9949)GENGAP(15.9949)GQMGPR	4	3	0	0.06061	0.234272	0.0558	0.7913	66	0.021863	0.019573	0.776476
264	P02454	GFSGLQGPP(15.9949)GSPGSP(15.9949)GEQGPSGASGPAGPR	4	2	0	0.014887	0.220881	0.0558	0.7913	76	0.001843	0.005095	0.053129
265	P02454	GFSGLDGAKGDTGP(15.9949)AGPK	12	2	0	0.075377	0.394159	0.0558	0.7913	34	0.013501	0.006703	-2.12959
266	P02454	EDLDCPNPQKR	5	3	0	0.066955	0.473642	0.0558	0.7913	25	0.01167	0.016178	0.163855
267	P02454	GLTGSP(15.9949)GSP(15.9949)GPDGK	12	2	0	0.020311	0.489475	0.0558	0.7913	27	0.000249	0.000535	-1.09496
268	P02454	GPAGPQGP(15.9949)RGDKGETGEQGDR	4	2	0	0.023603	0.326456	0.0558	0.7913	53	0.002621	0.001465	-0.741289
269	P02454	NGDRGETGPAGPAGPIGPAGAR	12	3	0	0.003127	0.342538	0.0558	0.7913	57	0.001515	0.000153	0.933952
270	P02454	SAGVSVP(15.9949)GPMGPSGPR	10	2	0	0.011052	0.42023	0.0558	0.7913	36	0.000363	0.000512	0.116466
271	P02454	GAAGLP(15.9949)GP(15.9949)KGDRGDAGPK	8	4	0	0.019207	0.391042	0.0558	0.7913	41	0.000684	0.000609	-0.357833
272	P02454	GEPGP(15.9949)PGPAGFAGPP(15.9949)GADGQPGAK	4	3	0	0.023183	0.291684	0.0558	0.7913	61	0.000546	0.001552	-0.295097
273	P02454	DGEAGAQGAP(15.9949)GPAGPAGER	12	3	0	0.013561	0.401085	0.0558	0.7913	57	0.00015	0.000487	-0.327419
274	P02454	GFP(15.9949)GLP(15.9949)GPSGEPGKQGPSGASGER	7	2	0	0.046752	0.277089	0.0558	0.7913	58	0.003522	0.003054	0.304415
275	P02454	GAPGDRGEPGPP(15.9949)GPAGFAGPP(15.9949)GADGQPGAK	11	3	0	0.035918	0.21708	0.0558	0.7913	77	0.002789	0.00306	-0.346159
276	P02454	EGECCPFCPEEYVSPDAEVIGVEGPK	8	2	0	0.014726	0.185997	0.0558	0.7913	58	0.028638	0.007774	-0.182583
277	P02454	VGPP(15.9949)GPSGNAGPP(15.9949)GPP(15.9949)GPVGK	12	3	0	0.091873	0.333576	0.0558	0.7913	45	0.002972	0.00603	0.04353
278	P02770	TVM(15.9949)GDFAQFVDK	12	2	0	0.014808	0.429026	0.0558	0.7913	17	0.209912	0.034152	0.981625
279	P02770	YMCENQATISSK	6	2	0	0.125529	0.437526	0.0558	0.7913	24	0.043652	0.056255	0.110476
280	P02770	FPNAEFAEITK	10	2	0	0.015565	0.475611	0.0558	0.7913	23	0.193066	0.024192	0.968092
281	P02770	LVQEVTDFAK	10	2	0	0.010479	0.517018	0.0558	0.7913	17	0.205762	0.019942	0.986406
282	P02770	SIHTLFGDK	5	2	0	0.046435	0.556458	0.0558	0.7913	12	0.076123	0.037393	0.819126
283	P02770	APQVSTPTLVEAAR	6	3	0	0.012854	0.448512	0.0558	0.7913	33	0.175366	0.017913	0.99212
284	P02770	LQACCDKPVLQK	4	2	0	0.401655	0.435258	0.0558	0.7913	22	0.010083	0.04746	0.051478
285	P02770	AETFTFHSDICTLPDKEK	4	3	0	0.002502	0.294279	0.0558	0.7913	29	0.155896	0.005347	0.99792
286	P02770	KQTALAELVK	8	2	0	0.01279	0.535049	0.0558	0.7913	19	0.199292	0.021711	0.983872
287	P02770	TNCELYEK	9	2	0	0.033977	0.554086	0.0558	0.7913	13	0.13252	0.049793	0.887853
288	P02770	CCTLPEAQR	10	2	0	0.057815	0.534924	0.0558	0.7913	22	0.138379	0.060705	0.897354
289	P02770	RPCFSALTVDETYVPK	7	3	0	0.01133	0.335885	0.0558	0.7913	26	0.208936	0.027862	0.976835
290	P02770	APQVSTPTLVEAAR	12	2	0	0.012401	0.448512	0.0558	0.7913	33	0.19624	0.017348	0.991473
291	P02770	LRDNYGELADCCAK	7	3	0	0.290126	0.392767	0.0558	0.7913	29	0.008069	0.026507	0.038622
292	P02770	KYEATLEK	9	2	0	0.034385	0.571728	0.0558	0.7913	14	0.213086	0.069961	0.885448
293	P02770	RPCFSALTVDETYVPK	6	2	0	0.012889	0.335885	0.0558	0.7913	26	0.198926	0.030166	0.97304
294	P02770	CCSGSLVER	7	2	0	0.018618	0.561176	0.0558	0.7913	19	0.184521	0.027711	0.958403
295	P02770	YNEVLTQCCTESDK	8	2	0	0.019194	0.38333	0.0558	0.7913	24	0.237256	0.048314	0.972094
296	P02770	DNYGELADCCAK	8	2	0	0.015067	0.458998	0.0558	0.7913	24	0.202588	0.026544	0.982523
297	P02770	AADKDNCFATEGPNLVAR	9	3	0	0.01402	0.339725	0.0558	0.7913	39	0.223584	0.030705	0.981612
298	P02770	TVMGDFAQFVDK	8	2	0	0.012652	0.439372	0.0558	0.7913	17	0.213818	0.028422	0.979466
299	P02770	LGEYGFQNAVLVR	10	2	0	0.00745	0.426408	0.0558	0.7913	24	0.222119	0.015182	0.996482
300	contaminant_KERATIN22	SISISVAGGGGGFGAAGGFGGR	5	2	0	0.021473	0.357923	0.0558	0.7913	47	0.003186	0.004776	-0.874346
301	P17475	AVLTLDER	6	2	0	0.202081	0.603463	0.0558	0.7913	15	0.021802	0.0369	-0.225848
302	P17475	SAILYFPK	6	2	0	0.039188	0.560416	0.0558	0.7913	12	0.145947	0.059212	0.664597
303	P12346	LYLGHSYVTAIR	6	3	0	0.032081	0.439638	0.0558	0.7913	19	0.283398	0.096109	0.945185
304	P12346	KPVDQYEDCYLAR	4	3	0	0.406395	0.388231	0.0558	0.7913	26	0.02876	0.156393	0.152797
305	P12346	DGGGDVAFVK	11	2	0	0.044682	0.582378	0.0558	0.7913	16	0.262402	0.099521	0.897037
306	P12346	FDEFFSQGCAPGYK	8	2	0	0.013314	0.375055	0.0558	0.7913	27	0.418164	0.061019	0.984143
307	P12346	DQYELLCLDNTR	4	2	0	0.013468	0.425708	0.0558	0.7913	21	0.527539	0.065972	0.990298
308	P12346	GYYAVAVVK	10	2	0	0.021856	0.557036	0.0558	0.7913	13	0.305371	0.071412	0.897158
309	P12346	IPSHAVVAR	4	3	0	0.052923	0.581523	0.0558	0.7913	22	0.10542	0.035364	0.92863
310	P50609	ELHLDHNQISR	8	2	0	0.030301	0.4728	0.0558	0.7913	26	0.016797	0.003992	0.92185
311	P50609	DCPQECDCPPNFPTAM(15.9949)YCDNR	9	3	0	0.006216	0.213181	0.0558	0.7913	44	0.029919	0.003624	0.920665
312	P50609	IPPVNTNLENLYLQGNR	10	3	0	0.00948	0.330468	0.0558	0.7913	30	0.020032	0.002038	0.974923
313	P50609	DCPQECDCPPNFPTAMYCDNR	7	3	0	0.008099	0.218321	0.0558	0.7913	44	0.037549	0.009553	0.628631
314	P50609	IPPVNTNLENLYLQGNR	7	2	0	0.011846	0.330468	0.0558	0.7913	30	0.019055	0.002433	0.978418
315	P50609	LDGNEIKR	5	2	0	0.011334	0.599054	0.0558	0.7913	15	0.011853	0.002694	0.876189
316	P50609	ELHLDHNQISR	12	3	0	0.020368	0.4728	0.0558	0.7913	26	0.021649	0.003588	0.955993

## Sheet: hl-data
ID	t	A0	m0	m1	m2	m3	m4	m5	notFoundBySE
0	0	0.470288	0.470288	0.323207	0.145444	0.048455	0.012605	0
0	0	0.45917	0.45917	0.331709	0.151629	0.045629	0.011863	0
0	3	0.441097	0.441097	0.325228	0.158965	0.0576	0.017111	0
0	3	0.436917	0.436917	0.331087	0.158035	0.056848	0.017112	0
0	3	0.44036	0.44036	0.340452	0.151153	0.053383	0.014652	0
0	6	0.423392	0.423392	0.328175	0.164545	0.064211	0.019677	0
0	6	0.414677	0.414677	0.3367	0.164075	0.065231	0.019318	0
0	6	0.419075	0.419075	0.332178	0.16744	0.062831	0.018475	0
0	15	0.321408	0.321408	0.334952	0.203439	0.093288	0.035677	0.011237
0	15	0.297769	0.297769	0.311216	0.218043	0.107929	0.042329	0.017481
0	63	0.205959	0.205959	0.30646	0.24721	0.141301	0.067683	0.021239
0	63	0.220894	0.220894	0.304327	0.248883	0.134982	0.060051	0.021997
1	0	0.487189	0.487189	0.33711	0.136276	0.033255	0.00617	0
1	0	0.506904	0.506904	0.343733	0.115887	0.030647	0.002829	0
1	3	0.460686	0.460686	0.351773	0.14133	0.042895	0.003316	0
1	3	0.45859	0.45859	0.338887	0.145865	0.042622	0.014036	0
1	3	0.436632	0.436632	0.351312	0.158056	0.048171	0.005828	0
1	6	0.450034	0.450034	0.346154	0.153434	0.038736	0.011642	0
1	6	0.452818	0.452818	0.329481	0.155207	0.052528	0.009966	0
1	6	0.477616	0.477616	0.320489	0.149309	0.042371	0.010216	0
1	15	0.343292	0.343292	0.349411	0.193547	0.073599	0.036122	0.004028
1	15	0.293104	0.293104	0.326042	0.204942	0.114374	0.042142	0.018908
1	63	0.203124	0.203124	0.343584	0.241373	0.137155	0.067895	0.006869
1	63	0.236761	0.236761	0.306331	0.250471	0.130252	0.06458	0.011605
2	0	0.496515	0.496515	0.315304	0.137045	0.048562	0.002575	0
2	0	0.443423	0.443423	0.367945	0.146335	0.039004	0.003292	0
2	3	0.467425	0.467425	0.323351	0.157822	0.047564	0.003837	0
2	3	0.474148	0.474148	0.355231	0.151187	0.019434	0	0
2	3	0.457426	0.457426	0.323769	0.149096	0.052969	0.01674	0
2	6	0.425281	0.425281	0.321446	0.178602	0.058348	0.016322	0
2	6	0.448383	0.448383	0.311277	0.169323	0.0638	0.007217	0
2	6	0.428708	0.428708	0.315975	0.173502	0.064976	0.016839	0
2	15	0.39205	0.39205	0.301292	0.185341	0.09712	0.020456	0.003741
2	15	0.283042	0.283042	0.328768	0.234478	0.114353	0.028911	0.010448
2	63	0.116469	0.116469	0.445839	0.229021	0.195595	0.013075	0
2	63	0.135008	0.135008	0.153048	0.329396	0.302889	0.06751	0.012148
3	3	0.452832	0.452832	0.361224	0.161506	0.024411	2.6e-05	0
3	3	0.467256	0.467256	0.362539	0.136567	0.028086	0.005553	0
3	3	0.502233	0.502233	0.350106	0.131672	0.015989	0	0
3	6	0.450935	0.450935	0.364389	0.150631	0.034045	0	0
3	6	0.450954	0.450954	0.36205	0.138515	0.040889	0.007591	0
3	6	0.468561	0.468561	0.365563	0.161813	0.004063	0	0
3	15	0.329123	0.329123	0.339246	0.242438	0.086174	0.003019	0
3	15	0.31836	0.31836	0.319064	0.19686	0.119088	0.043194	0.003434
3	63	0.239255	0.239255	0.365312	0.287063	0.08293	0.02544	0
3	63	0.238586	0.238586	0.368462	0.224603	0.124284	0.038207	0.005859
4	0	0.616098	0.616098	0.301482	0.0694	0.01302	0	0
4	3	0.612375	0.612375	0.290471	0.078859	0.018296	0	0
4	6	0.577063	0.577063	0.303923	0.098663	0.020351	0	0
4	6	0.590288	0.590288	0.297355	0.090434	0.021923	0	0
4	15	0.506266	0.506266	0.337746	0.11739	0.035125	0.003473	0
4	15	0.485519	0.485519	0.341801	0.126614	0.039947	0.006119	0
4	63	0.411203	0.411203	0.351902	0.173026	0.056261	0.007608	0
4	63	0.407881	0.407881	0.362012	0.166083	0.054966	0.009058	0
5	0	0.45459	0.45459	0.355951	0.172917	0.016542	0	0
5	0	0.525078	0.525078	0.33545	0.139472	0	0	0
5	3	0.30957	0.30957	0.427207	0.244005	0.019218	0	0
5	6	0.368215	0.368215	0.366132	0.187492	0.073605	0.004557	0
5	6	0.393683	0.393683	0.267551	0.280858	0.057909	0	0
6	3	0.564178	0.564178	0.271696	0.109436	0.049411	0.005278	0
6	3	0.465385	0.465385	0.289195	0.165777	0.079642	0	0
6	3	0.484264	0.484264	0.361999	0.106907	0.04683	0	0
6	6	0.486723	0.486723	0.336586	0.117897	0.058794	0	0
6	6	0.541678	0.541678	0.303638	0.138164	0.016519	0	0
6	6	0.459476	0.459476	0.276777	0.113338	0.135022	0.015387	0
6	15	0.357151	0.357151	0.330141	0.166412	0.139228	0.007069	0
6	15	0.366997	0.366997	0.324131	0.237695	0.070823	0.000353	0
7	0	0.411955	0.411955	0.37396	0.188306	0.026674	-0.000894	0
7	3	0.391497	0.391497	0.379759	0.141742	0.046609	0.037118	0.003275
7	3	0.305148	0.305148	0.345275	0.208778	0.105869	0.034934	-4e-06
7	3	0.301392	0.301392	0.346601	0.242977	0.108086	0.000944	0
7	6	0.327912	0.327912	0.36739	0.291912	0.012785	0	0
7	6	0.255463	0.255463	0.394649	0.244616	0.104343	0.000929	0
7	15	0.274813	0.274813	0.398945	0.282579	0.03584	0.007823	0
7	15	0.198608	0.198608	0.4081	0.263287	0.115981	0.014024	0
7	63	0.402277	0.402277	0.401141	0.145413	0.0511	7e-05	0
8	0	0.401329	0.401329	0.379475	0.161246	0.025304	0.024691	0.007956
8	0	0.455333	0.455333	0.334048	0.191326	0.019293	0	0
8	3	0.317639	0.317639	0.393369	0.252317	0.035528	0.001147	0
8	3	0.460056	0.460056	0.303516	0.184235	0.038091	0.014102	0
8	3	0.437329	0.437329	0.35606	0.120443	0.071306	0.014862	0
8	6	0.319482	0.319482	0.357821	0.184316	0.099179	0.039202	0
8	6	0.349196	0.349196	0.353967	0.226328	0.02957	0.040939	0
8	6	0.335604	0.335604	0.327891	0.163664	0.099161	0.06574	0.007941
9	3	0.569621	0.569621	0.347238	0.076023	0.007118	0	0
9	3	0.608942	0.608942	0.286252	0.05858	0.036419	0.009807	0
9	3	0.547132	0.547132	0.333686	0.084442	0.029054	0.005686	0
9	6	0.515388	0.515388	0.364895	0.087627	0.03209	0	0
9	6	0.462889	0.462889	0.315693	0.113383	0.038874	0.028247	0.040914
9	6	0.506091	0.506091	0.306014	0.134022	0.039538	0.014336	0
9	15	0.40674	0.40674	0.334245	0.171123	0.025437	0.020822	0.041632
9	15	0.404055	0.404055	0.291273	0.177142	0.090102	0.028077	0.009351
9	63	0.196864	0.196864	0.29384	0.217563	0.120282	0.06392	0.09663
10	3	0.130281	0.130281	0.266028	0.284581	0.160236	0.100739	0.050618
10	3	0.13311	0.13311	0.240953	0.277865	0.186262	0.10448	0.04232
10	3	0.151195	0.151195	0.274408	0.258622	0.180291	0.085584	0.039105
10	15	0.0621882	0.062188	0.191572	0.24809	0.239027	0.140038	0.07585
10	63	0.0695719	0.069572	0.17933	0.227291	0.216474	0.172042	0.080217
10	63	0.0640986	0.064099	0.162352	0.245692	0.21729	0.177967	0.091253
11	0	0.407812	0.407812	0.287455	0.225309	0.067672	0.011752	0
11	3	0.257579	0.257579	0.232823	0.272275	0.138263	0.061554	0.026838
11	3	0.265283	0.265283	0.227064	0.263509	0.112229	0.059316	0.019545
11	6	0.239414	0.239414	0.18035	0.236619	0.161002	0.084351	0.039659
11	15	0.195051	0.195051	0.16737	0.273331	0.170324	0.110239	0.055317
11	63	0.183033	0.183033	0.148565	0.284035	0.189669	0.129839	0.039467
12	3	0.255796	0.255796	0.331699	0.241246	0.120147	0.036309	0.014802
12	3	0.2529	0.2529	0.323005	0.240512	0.130079	0.051585	0.001919
12	3	0.273569	0.273569	0.351295	0.244263	0.101438	0.023165	0.00627
12	6	0.198103	0.198103	0.302942	0.267306	0.141453	0.064972	0.022162
12	6	0.200106	0.200106	0.300517	0.244093	0.149977	0.092741	0.012566
12	6	0.187649	0.187649	0.289951	0.27625	0.159342	0.068752	0.018102
12	15	0.151335	0.151335	0.291224	0.295543	0.157219	0.084601	0.020116
12	15	0.121823	0.121823	0.291155	0.281124	0.16041	0.114921	0.030568
12	63	0.120905	0.120905	0.299695	0.267988	0.202435	0.076429	0.023815
12	63	1	1	0	0	0	0	0
13	3	0.0325755	0.032575	0.003131	0.001969	0.002251	0.250467	0.348707
13	3	0.845406	0.845406	0.154594	0	0	0	0
13	15	0.684075	0.684075	0.177337	0.108313	0.030275	0	0
13	15	0.0486173	0.048617	0.016381	0.005188	0.004858	0.147754	0.303371
13	63	0.863869	0.863869	0.097088	0.039043	0	0	0
13	63	0.0196123	0.019612	0.004406	0.001921	0.001247	0.138601	0.332982
14	3	0.457711	0.457711	0.351574	0.141343	0.044184	0.005187	0
14	3	0.463113	0.463113	0.343895	0.1438	0.040928	0.008264	0
14	3	0.46383	0.46383	0.344666	0.142922	0.042398	0.006184	0
14	6	0.462407	0.462407	0.3392	0.137273	0.051168	0.009952	0
14	6	0.456418	0.456418	0.331727	0.153226	0.052096	0.006533	0
14	15	0.376804	0.376804	0.318239	0.177737	0.084815	0.031993	0.010413
14	15	0.331849	0.331849	0.313606	0.188262	0.107542	0.045916	0.012825
14	63	0.251425	0.251425	0.306282	0.226091	0.134163	0.061441	0.020599
15	0	0.527632	0.527632	0.339827	0.124103	0.008438	0	0
15	3	0.571703	0.571703	0.313766	0.104005	0.010526	0	0
15	3	0.581445	0.581445	0.296301	0.118169	0.004085	0	0
15	63	0.518574	0.518574	0.365187	0.108778	0.007461	0	0
16	0	0.587054	0.587054	0.298741	0.097772	0.016432	0	0
16	0	0.589363	0.589363	0.308231	0.093173	0.009233	0	0
16	3	0.592047	0.592047	0.407953	0	0	0	0
16	15	0.468476	0.468476	0.361207	0.138361	0.031956	0	0
17	0	0.26628	0.26628	0.341645	0.230489	0.107173	0.040187	0.014227
17	0	0.259818	0.259818	0.340033	0.229887	0.118582	0.043756	0.007924
17	3	0.266822	0.266822	0.309271	0.236539	0.113156	0.053894	0.017256
17	3	0.263769	0.263769	0.3177	0.228665	0.128934	0.045679	0.015253
17	3	0.272312	0.272312	0.322822	0.225611	0.11761	0.051371	0.010275
17	6	0.256976	0.256976	0.326371	0.227846	0.108348	0.055446	0.019008
17	6	0.241004	0.241004	0.330544	0.219039	0.132176	0.054701	0.020311
18	0	0.293707	0.293707	0.336755	0.22015	0.09851	0.041078	0.0098
18	0	0.284953	0.284953	0.341838	0.222222	0.102694	0.038034	0.010259
18	3	0.289016	0.289016	0.338698	0.219774	0.104326	0.038415	0.009771
18	3	0.287434	0.287434	0.348972	0.215726	0.102087	0.036535	0.009246
18	6	0.270287	0.270287	0.333144	0.229725	0.113777	0.040223	0.012843
18	15	0.283303	0.283303	0.337127	0.231366	0.099729	0.036794	0.011682
18	63	0.282999	0.282999	0.351903	0.219932	0.099173	0.034605	0.011387
18	63	0.287266	0.287266	0.340965	0.227847	0.098254	0.035426	0.010242
19	0	0.430364	0.430364	0.344086	0.169792	0.050127	0.005632	0
19	3	0.387926	0.387926	0.323272	0.192732	0.066802	0.023597	0.005671
19	3	0.405404	0.405404	0.292981	0.205779	0.069047	0.022712	0.004078
19	6	0.389579	0.389579	0.357395	0.187037	0.055182	0.010808	0
19	6	0.387149	0.387149	0.350568	0.185695	0.060174	0.016415	0
19	15	0.269735	0.269735	0.296572	0.240539	0.116288	0.037912	0.027201
19	63	0.247042	0.247042	0.30725	0.238931	0.132056	0.044556	0.017998
19	63	0.22872	0.22872	0.305445	0.253335	0.127379	0.05557	0.016955
20	0	0.340245	0.340245	0.34961	0.184338	0.061559	0.024983	0.031438
20	0	0.465234	0.465234	0.407656	0.110042	0.017068	0	0
20	3	0.311794	0.311794	0.314832	0.211147	0.084327	0.037663	0.028324
20	3	0.294652	0.294652	0.327818	0.218333	0.084974	0.04737	0.022315
20	3	0.314604	0.314604	0.308957	0.220368	0.084717	0.023776	0.042501
20	6	0.386183	0.386183	0.375481	0.171564	0.050454	0.016318	0
20	6	0.297767	0.297767	0.312361	0.18801	0.093125	0.050803	0.051524
20	6	0.298886	0.298886	0.29477	0.191471	0.113925	0.050634	0.044908
21	3	0.354278	0.354278	0.302328	0.14225	0.059265	0.065606	0.045446
21	3	0.411576	0.411576	0.346529	0.161963	0.060855	0.019077	0
21	3	0.35614	0.35614	0.306267	0.149048	0.052365	0.051569	0.063313
21	6	0.317242	0.317242	0.288252	0.144923	0.051495	0.085071	0.077285
21	6	0.38935	0.38935	0.359977	0.170928	0.061301	0.018443	0
21	15	0.297222	0.297222	0.3346	0.216748	0.096421	0.028819	0.018552
21	15	0.288707	0.288707	0.336473	0.222255	0.104269	0.03703	0.011265
21	63	0.163093	0.163093	0.321507	0.276039	0.165677	0.06149	0.012195
21	63	0.168516	0.168516	0.313773	0.258589	0.169308	0.0672	0.021429
22	0	0.256422	0.256422	0.233558	0.114243	0.165848	0.110558	0.08051
22	0	0.23956	0.23956	0.237869	0.111218	0.174654	0.135743	0.068941
22	3	0.296711	0.296711	0.288656	0.181066	0.113332	0.072605	0.033491
22	3	0.307372	0.307372	0.281692	0.165032	0.120508	0.052275	0.04662
22	3	0.300785	0.300785	0.280612	0.176413	0.110938	0.069505	0.039785
22	6	0.272467	0.272467	0.267165	0.164823	0.114175	0.082711	0.047438
22	6	0.285134	0.285134	0.300076	0.14873	0.10368	0.084224	0.056025
22	15	0.30416	0.30416	0.276276	0.187026	0.09985	0.042623	0.043061
22	15	0.301161	0.301161	0.292381	0.191153	0.094717	0.059626	0.031446
23	0	0.432475	0.432475	0.346377	0.153362	0.055383	0.012403	0
23	0	0.436112	0.436112	0.345526	0.153737	0.052209	0.012416	0
23	3	0.427574	0.427574	0.345865	0.158081	0.056252	0.012228	0
23	3	0.425586	0.425586	0.344479	0.162497	0.052526	0.014912	0
23	3	0.426094	0.426094	0.35278	0.157899	0.05025	0.012978	0
23	6	0.426745	0.426745	0.343057	0.163146	0.054637	0.012414	0
23	6	0.423493	0.423493	0.345513	0.159464	0.056473	0.015057	0
23	6	0.421182	0.421182	0.354358	0.154933	0.055188	0.014338	0
23	15	0.420221	0.420221	0.344567	0.160523	0.057248	0.017442	0
23	15	0.420939	0.420939	0.350274	0.159318	0.053716	0.015752	0
23	63	0.40524	0.40524	0.344064	0.164073	0.059733	0.020381	0.006508
23	63	0.408285	0.408285	0.338259	0.163716	0.060929	0.020879	0.007931
24	0	0.00171239	0.001712	0.305321	0.346547	0.21217	0.092771	0.032248
24	0	0.00144784	0.001448	0.303963	0.350291	0.210693	0.091845	0.032212
24	3	0.00181913	0.001819	0.301823	0.343173	0.213911	0.095177	0.033417
24	3	0.00171678	0.001717	0.303329	0.346926	0.211907	0.092989	0.033083
24	3	0.00188817	0.001888	0.306274	0.345268	0.212167	0.093835	0.031572
24	6	0.00186914	0.001869	0.301553	0.343018	0.213781	0.093631	0.034489
24	6	0.0021296	0.00213	0.299599	0.342831	0.213128	0.0957	0.035183
24	6	0.00175414	0.001754	0.302901	0.340913	0.211629	0.096087	0.035063
24	15	0.00190807	0.001908	0.282128	0.32644	0.215715	0.101071	0.045032
24	15	0.00170619	0.001706	0.2863	0.32866	0.210867	0.102156	0.042717
24	63	0.00184302	0.001843	0.252568	0.304353	0.203501	0.114905	0.06164
24	63	0.00191999	0.00192	0.244059	0.294169	0.20574	0.118559	0.066384
25	0	0.226032	0.226032	0.309039	0.218659	0.12872	0.070562	0.031675
25	0	0.238426	0.238426	0.317399	0.223872	0.126484	0.060639	0.023964
25	3	0.207412	0.207412	0.293861	0.216114	0.143001	0.082976	0.035205
25	3	0.232683	0.232683	0.325586	0.227792	0.12695	0.056242	0.024241
25	3	0.221669	0.221669	0.318453	0.22974	0.134848	0.059705	0.026223
25	6	0.222808	0.222808	0.298416	0.211322	0.132742	0.076938	0.035949
25	6	0.227667	0.227667	0.317034	0.231417	0.12626	0.061417	0.028487
25	6	0.227569	0.227569	0.314381	0.229141	0.131115	0.061378	0.026976
25	15	0.22841	0.22841	0.313526	0.227441	0.131618	0.065064	0.021731
25	15	0.227658	0.227658	0.31815	0.218878	0.12714	0.063794	0.032966
25	63	0.218595	0.218595	0.302794	0.227818	0.13351	0.061221	0.033272
25	63	0.225076	0.225076	0.305749	0.220124	0.126131	0.062823	0.035166
26	0	0.156344	0.156344	0.284925	0.246778	0.178083	0.089954	0.034225
26	3	0.165778	0.165778	0.294159	0.238287	0.17628	0.0823	0.036919
26	3	0.194602	0.194602	0.276722	0.228553	0.157299	0.086294	0.048572
26	6	0.165851	0.165851	0.287256	0.237255	0.167478	0.088804	0.045183
26	6	0.149147	0.149147	0.285772	0.240097	0.171237	0.097114	0.045431
26	63	0.143552	0.143552	0.253814	0.23919	0.148679	0.090365	0.060357
26	63	0.126688	0.126688	0.245075	0.242559	0.176443	0.080665	0.065935
27	0	0.573166	0.573166	0.307234	0.096307	0.023293	0	0
27	0	0.568373	0.568373	0.317448	0.100971	0.013208	0	0
27	6	0.561596	0.561596	0.314384	0.097088	0.026932	0	0
27	6	0.573616	0.573616	0.310534	0.096341	0.01951	0	0
27	15	0.557861	0.557861	0.330141	0.085874	0.026124	0	0
27	63	0.517998	0.517998	0.332827	0.112333	0.033982	0.00286	0
27	63	0.540824	0.540824	0.315672	0.105571	0.033633	0.004301	0
28	0	0.263541	0.263541	0.332417	0.228147	0.115366	0.045232	0.015297
28	0	0.260435	0.260435	0.328589	0.233372	0.1181	0.045233	0.014271
28	3	0.268655	0.268655	0.332261	0.229181	0.111349	0.044071	0.014483
28	3	0.262467	0.262467	0.332265	0.22957	0.1155	0.045019	0.01518
28	3	0.266789	0.266789	0.330865	0.230722	0.112321	0.045062	0.014241
28	6	0.258051	0.258051	0.331522	0.232702	0.113136	0.043199	0.016864
28	6	0.259819	0.259819	0.326997	0.227457	0.115365	0.046413	0.01779
28	6	0.265886	0.265886	0.328656	0.22861	0.114219	0.04702	0.015609
28	15	0.258923	0.258923	0.323863	0.22504	0.114823	0.049847	0.019915
28	15	0.259214	0.259214	0.325532	0.228281	0.114227	0.047922	0.018353
28	63	0.248755	0.248755	0.312187	0.221851	0.120916	0.055596	0.028248
28	63	0.237912	0.237912	0.305282	0.223819	0.11673	0.060881	0.028977
29	3	0.00651307	0.006513	0.014238	0.203539	0.25737	0.23654	0.128878
29	6	0.0169506	0.016951	0.015953	0.072352	0.141724	0.09952	0.090023
29	6	0.121052	0.121052	0.196571	0.176739	0.096719	0.113842	0.119325
29	6	0.145729	0.145729	0.232747	0.186793	0.112781	0.09602	0.09571
29	15	0.0209582	0.020958	0.035949	0.157236	0.171078	0.177619	0.131775
30	0	0.265911	0.265911	0.332979	0.230659	0.112213	0.044072	0.014165
30	0	0.259783	0.259783	0.334135	0.231151	0.115758	0.04506	0.014113
30	3	0.258776	0.258776	0.332903	0.225514	0.114911	0.045807	0.017016
30	3	0.264	0.264	0.328935	0.230068	0.115226	0.04617	0.0156
30	3	0.261758	0.261758	0.331374	0.229576	0.11479	0.047309	0.015193
30	6	0.266151	0.266151	0.335262	0.225516	0.114236	0.043619	0.015216
30	6	0.262341	0.262341	0.334436	0.225284	0.116536	0.046599	0.014803
30	6	0.24416	0.24416	0.326219	0.238746	0.122461	0.046427	0.016749
30	15	0.254147	0.254147	0.321801	0.229177	0.121085	0.049423	0.01811
30	15	0.261118	0.261118	0.325842	0.226206	0.117744	0.047088	0.016482
30	63	0.254918	0.254918	0.324469	0.226766	0.115099	0.050533	0.018913
30	63	0.248881	0.248881	0.32185	0.223064	0.118384	0.054042	0.023304
31	0	0.461338	0.461338	0.290787	0.175649	0.042353	0.029038	0.000836
31	3	0.415707	0.415707	0.319535	0.180706	0.066666	0.017386	0
31	3	0.452516	0.452516	0.32294	0.151376	0.058105	0.015063	0
31	6	0.429429	0.429429	0.3409	0.156302	0.062796	0.010573	0
31	6	0.414806	0.414806	0.318643	0.164352	0.069392	0.023824	0.008983
31	15	0.40444	0.40444	0.337875	0.17621	0.056529	0.022824	0.002122
31	15	0.3942	0.3942	0.32279	0.189469	0.070778	0.019865	0.002899
31	63	0.425648	0.425648	0.261114	0.191404	0.057517	0.053849	0.010468
31	63	0.417768	0.417768	0.314112	0.161348	0.064092	0.033672	0.009008
32	0	0.314368	0.314368	0.314842	0.163421	0.076905	0.066194	0.035617
32	0	0.296262	0.296262	0.312322	0.19824	0.061789	0.072918	0.043131
32	3	0.295975	0.295975	0.292414	0.147888	0.072125	0.093473	0.044442
32	3	0.30539	0.30539	0.330572	0.161357	0.079784	0.056651	0.036258
32	3	0.302059	0.302059	0.320948	0.150994	0.046101	0.08378	0.041034
32	6	0.29621	0.29621	0.298914	0.125758	0.064141	0.116514	0.065697
32	6	0.298883	0.298883	0.331669	0.183645	0.069547	0.073676	0.039871
32	6	0.316395	0.316395	0.342112	0.200954	0.070797	0.026569	0.032999
32	15	0.270384	0.270384	0.333333	0.194283	0.072575	0.049413	0.050357
32	15	0.304242	0.304242	0.36112	0.168763	0.089529	0.036098	0.02685
32	63	0.262176	0.262176	0.24146	0.169217	0.097125	0.097171	0.074723
32	63	0.328668	0.328668	0.285144	0.165507	0.088171	0.057129	0.045098
33	3	0.441102	0.441102	0.411129	0.070289	0.057204	0.020276	0
33	3	0.358928	0.358928	0.330444	0.167361	0.084903	0.043492	0.014873
33	6	0.358456	0.358456	0.321834	0.155845	0.088627	0.044088	0.018798
33	6	0.357587	0.357587	0.330565	0.165728	0.088637	0.039959	0.017524
33	6	0.386568	0.386568	0.339564	0.160145	0.074455	0.026626	0.012641
33	15	0.345359	0.345359	0.315627	0.163009	0.093037	0.049721	0.021937
33	15	0.347084	0.347084	0.306866	0.162302	0.096174	0.05138	0.024484
33	63	0.345737	0.345737	0.317306	0.178967	0.084126	0.041292	0.020787
33	63	0.350376	0.350376	0.306126	0.177875	0.084995	0.044216	0.024742
34	0	0.384808	0.384808	0.33351	0.15784	0.075595	0.029606	0.018641
34	0	0.39341	0.39341	0.337853	0.168238	0.070967	0.020309	0.009223
34	3	0.40045	0.40045	0.333804	0.177263	0.069642	0.018841	0
34	3	0.387342	0.387342	0.353922	0.154892	0.065038	0.024998	0.013808
34	3	0.398426	0.398426	0.333825	0.180669	0.067292	0.019788	0
34	6	0.382267	0.382267	0.33213	0.17856	0.07398	0.021848	0.011214
34	6	0.365134	0.365134	0.350326	0.162604	0.083454	0.025972	0.012509
34	6	0.404564	0.404564	0.364051	0.155661	0.058459	0.017266	0
34	15	0.359746	0.359746	0.320738	0.168882	0.06469	0.033078	0.01831
34	15	0.374965	0.374965	0.325063	0.159252	0.072204	0.028938	0.02664
34	63	0.363287	0.363287	0.34991	0.164816	0.074489	0.033592	0.013906
34	63	0.344346	0.344346	0.331667	0.18038	0.077561	0.040052	0.022123
35	0	0.426804	0.426804	0.350522	0.162821	0.044125	0.015728	0
35	0	0.420989	0.420989	0.361541	0.148258	0.053117	0.016095	0
35	3	0.404888	0.404888	0.360785	0.163221	0.062116	0.00899	0
35	3	0.426771	0.426771	0.326424	0.17638	0.056789	0.013636	0
35	6	0.407845	0.407845	0.355642	0.164018	0.057691	0.014803	0
35	6	0.429438	0.429438	0.373224	0.153087	0.044251	0	0
35	6	0.412198	0.412198	0.335125	0.172451	0.070293	0.009933	0
35	15	0.390247	0.390247	0.37056	0.15877	0.071937	0.008486	0
35	15	0.422906	0.422906	0.352825	0.157703	0.059217	0.007348	0
35	63	0.419203	0.419203	0.349721	0.159284	0.062467	0.009324	0
35	63	0.371874	0.371874	0.399536	0.144879	0.07666	0.007051	0
36	0	0.410955	0.410955	0.323433	0.155674	0.05982	0.028462	0.021712
36	0	0.427345	0.427345	0.338352	0.162076	0.058597	0.01363	0
36	3	0.394738	0.394738	0.330687	0.16847	0.068451	0.02047	0.017184
36	3	0.459786	0.459786	0.318542	0.153991	0.055393	0.012288	0
36	3	0.429681	0.429681	0.346852	0.13365	0.069334	0.020483	0
36	6	0.416411	0.416411	0.317822	0.160444	0.067677	0.024922	0.012725
36	6	0.417965	0.417965	0.329273	0.154209	0.066657	0.029535	0.002361
36	6	0.422265	0.422265	0.351377	0.162423	0.056841	0.007094	0
36	15	0.409969	0.409969	0.327167	0.158429	0.066168	0.027718	0.010549
36	15	0.40748	0.40748	0.332809	0.16956	0.07005	0.020101	0
36	63	0.363901	0.363901	0.298989	0.192662	0.080567	0.042513	0.020622
36	63	0.329072	0.329072	0.316617	0.189568	0.098715	0.051903	0.014125
37	0	0.284123	0.284123	0.34222	0.221429	0.104427	0.036523	0.011278
37	0	0.28278	0.28278	0.340791	0.223344	0.104196	0.037787	0.011102
37	3	0.283885	0.283885	0.337219	0.222751	0.105044	0.039079	0.012022
37	3	0.281876	0.281876	0.340065	0.22335	0.103627	0.038749	0.012333
37	3	0.281512	0.281512	0.340143	0.225255	0.103616	0.037915	0.011559
37	6	0.277795	0.277795	0.336979	0.225363	0.106155	0.040832	0.012876
37	6	0.2784	0.2784	0.338331	0.225326	0.104882	0.040287	0.012772
37	6	0.277252	0.277252	0.339684	0.224102	0.105905	0.039466	0.013591
37	15	0.265216	0.265216	0.333177	0.22204	0.110541	0.04594	0.016842
37	15	0.269865	0.269865	0.33457	0.225015	0.110134	0.044717	0.015699
37	63	0.253851	0.253851	0.320152	0.222611	0.114545	0.052879	0.024551
37	63	0.25051	0.25051	0.313314	0.218904	0.118739	0.056685	0.028294
38	0	0.336271	0.336271	0.350396	0.199073	0.081454	0.024497	0.008308
38	0	0.335909	0.335909	0.339069	0.199331	0.090887	0.028425	0.006378
38	3	0.322594	0.322594	0.348327	0.202964	0.086113	0.030247	0.009755
38	3	0.328298	0.328298	0.347808	0.204514	0.083571	0.028425	0.007384
38	3	0.331989	0.331989	0.353346	0.205645	0.082622	0.02315	0.003246
38	6	0.32263	0.32263	0.345807	0.205802	0.088778	0.029503	0.00748
38	6	0.323304	0.323304	0.348238	0.211096	0.083506	0.030255	0.003602
38	6	0.368635	0.368635	0.362457	0.200968	0.054718	0.013223	0
38	15	0.320397	0.320397	0.34432	0.205024	0.085823	0.035846	0.00859
38	15	0.308676	0.308676	0.336354	0.207607	0.097462	0.038603	0.011298
38	63	0.274114	0.274114	0.317488	0.207517	0.110745	0.053594	0.025269
38	63	0.272439	0.272439	0.317385	0.200915	0.114938	0.051916	0.029489
39	0	0.464247	0.464247	0.408344	0.121304	0.006104	0	0
39	0	0.556071	0.556071	0.365252	0.078676	0	0	0
39	3	0.259909	0.259909	0.518218	0.165663	0.056209	0	0
39	3	0.374017	0.374017	0.309644	0.210859	0.099459	0.006021	0
39	3	0.465003	0.465003	0.31944	0.163735	0.051822	0	0
39	6	0.373492	0.373492	0.245717	0.289646	0.061839	0.026663	0.002643
39	15	0.544958	0.544958	0.21017	0.244872	0	0	0
39	15	0.184023	0.184023	0.277792	0.263512	0.17206	0.038415	0.025998
40	0	0.245016	0.245016	0.333075	0.254449	0.109155	0.047777	0.010527
40	0	0.149466	0.149466	0.276338	0.268865	0.178169	0.087472	0.031188
40	3	0.203547	0.203547	0.304534	0.24256	0.148959	0.066799	0.01687
40	3	0.25951	0.25951	0.343905	0.242091	0.093376	0.048319	0.0128
40	6	0.221242	0.221242	0.324731	0.239017	0.155149	0.045518	0.014344
40	6	0.199658	0.199658	0.29291	0.246725	0.117403	0.061287	0.020393
40	15	0.169034	0.169034	0.295779	0.255775	0.146795	0.074464	0.02686
40	15	0.185258	0.185258	0.284251	0.262282	0.139533	0.06856	0.022297
40	63	0.133945	0.133945	0.267182	0.25376	0.197137	0.098477	0.041347
40	63	0.121254	0.121254	0.248495	0.260513	0.176541	0.107534	0.051011
41	0	0.410586	0.410586	0.352469	0.183649	0.053296	0	0
41	0	0.466163	0.466163	0.34684	0.160603	0.026394	0	0
41	3	0.399463	0.399463	0.362819	0.192291	0.03827	0.007157	0
41	3	0.390288	0.390288	0.356804	0.186792	0.062456	0.003661	0
41	3	0.401784	0.401784	0.372907	0.174558	0.044209	0.006541	0
41	6	0.422358	0.422358	0.389935	0.159726	0.027981	0	0
41	6	0.413918	0.413918	0.356968	0.161253	0.061373	0.006487	0
41	6	0.417937	0.417937	0.327999	0.196271	0.051244	0.006548	0
41	15	0.413376	0.413376	0.383208	0.153334	0.045779	0.004304	0
41	15	0.433545	0.433545	0.33047	0.174577	0.056353	0.005055	0
41	63	0.394099	0.394099	0.331821	0.189841	0.071281	0.012959	0
41	63	0.376704	0.376704	0.357784	0.178738	0.068159	0.018614	0
42	0	0.376322	0.376322	0.323607	0.183979	0.072399	0.035013	0.00868
42	3	0.373555	0.373555	0.312136	0.187648	0.077077	0.03506	0.014525
42	6	0.368098	0.368098	0.338607	0.17897	0.077717	0.026745	0.009862
42	63	0.334358	0.334358	0.308432	0.191532	0.094143	0.044574	0.021251
43	0	0.346066	0.346066	0.343808	0.204365	0.079786	0.021678	0.004297
43	0	0.330681	0.330681	0.349411	0.201483	0.084444	0.028656	0.005325
43	3	0.328157	0.328157	0.347222	0.207133	0.086918	0.025611	0.004958
43	3	0.323652	0.323652	0.349836	0.203643	0.089784	0.025234	0.00785
43	3	0.307717	0.307717	0.362498	0.210698	0.081138	0.031184	0.006766
43	6	0.323844	0.323844	0.355716	0.200505	0.08676	0.025674	0.007501
43	6	0.325116	0.325116	0.355156	0.204645	0.079931	0.026845	0.008307
43	6	0.357245	0.357245	0.343552	0.192338	0.076589	0.026507	0.003768
43	15	0.309599	0.309599	0.337469	0.213526	0.096116	0.032834	0.010455
43	15	0.308007	0.308007	0.346639	0.211654	0.093287	0.032697	0.007717
43	63	0.300033	0.300033	0.339423	0.214363	0.096083	0.034567	0.01553
43	63	0.293893	0.293893	0.328603	0.210848	0.102538	0.038818	0.017649
44	0	0.263188	0.263188	0.332691	0.227072	0.117283	0.044655	0.015112
44	0	0.267	0.267	0.327312	0.227232	0.116901	0.046734	0.01482
44	3	0.261313	0.261313	0.327086	0.234566	0.117032	0.044738	0.015263
44	3	0.265856	0.265856	0.331413	0.228462	0.11315	0.045059	0.016059
44	3	0.263162	0.263162	0.330559	0.228251	0.115418	0.04688	0.01573
44	6	0.265426	0.265426	0.32842	0.230593	0.113161	0.047399	0.015002
44	6	0.262586	0.262586	0.327528	0.226645	0.118362	0.049051	0.015828
44	6	0.263045	0.263045	0.325596	0.230145	0.11331	0.046252	0.016432
44	15	0.254551	0.254551	0.323608	0.228698	0.117076	0.049306	0.019445
44	15	0.25851	0.25851	0.322489	0.231771	0.114313	0.04788	0.018805
44	63	0.246882	0.246882	0.313018	0.226676	0.114289	0.059818	0.026485
44	63	0.23952	0.23952	0.305449	0.219541	0.119178	0.060751	0.029477
45	0	0.163938	0.163938	0.263834	0.198816	0.110923	0.089768	0.077379
45	0	0.185614	0.185614	0.285421	0.2378	0.129384	0.072324	0.0481
45	3	0.156447	0.156447	0.230311	0.196345	0.110295	0.096473	0.086681
45	3	0.190483	0.190483	0.298081	0.237593	0.129324	0.072077	0.039929
45	3	0.161725	0.161725	0.245432	0.185984	0.114941	0.093897	0.078181
45	6	0.186567	0.186567	0.265989	0.219835	0.12223	0.077094	0.05758
45	6	0.188937	0.188937	0.274679	0.226906	0.131786	0.076936	0.047443
45	6	0.141841	0.141841	0.218425	0.178949	0.101921	0.096105	0.102361
45	15	0.0376121	0.037612	0.023806	0.195531	0.282523	0.22652	0.131739
45	15	0.0494654	0.049465	0.03302	0.204794	0.265761	0.218908	0.127515
45	63	0.15743	0.15743	0.250052	0.202342	0.122223	0.08544	0.070608
45	63	0.176352	0.176352	0.267431	0.222808	0.133532	0.080647	0.056611
46	0	0.221074	0.221074	0.326215	0.25203	0.130482	0.054635	0.015563
46	0	0.229268	0.229268	0.317725	0.244786	0.128151	0.055946	0.018693
46	3	0.23294	0.23294	0.319065	0.232135	0.132972	0.054586	0.022538
46	3	0.226008	0.226008	0.321494	0.248334	0.126004	0.055298	0.01808
46	3	0.225852	0.225852	0.324604	0.244423	0.127611	0.05376	0.01717
46	6	0.220815	0.220815	0.321768	0.250915	0.126474	0.053936	0.01965
46	6	0.228722	0.228722	0.314101	0.242132	0.135474	0.056133	0.017241
46	6	0.233775	0.233775	0.325705	0.229245	0.130239	0.054624	0.020519
46	15	0.227825	0.227825	0.312681	0.235078	0.131018	0.059095	0.023804
46	15	0.225017	0.225017	0.308016	0.245484	0.127895	0.058952	0.024166
46	63	0.21575	0.21575	0.294878	0.234825	0.125313	0.063375	0.033594
46	63	0.209528	0.209528	0.290727	0.221555	0.13057	0.063795	0.035468
47	0	0.252781	0.252781	0.373481	0.245	0.107596	0.021143	0
47	3	0.250945	0.250945	0.361814	0.232802	0.120521	0.032386	0.001533
47	6	0.244977	0.244977	0.399752	0.239754	0.090757	0.022723	0.002037
47	6	0.271807	0.271807	0.373074	0.237625	0.092288	0.021048	0.004158
47	15	0.255872	0.255872	0.328426	0.266094	0.121181	0.024189	0.004238
47	15	0.25848	0.25848	0.353063	0.240743	0.101113	0.041433	0.005168
47	63	0.250361	0.250361	0.333511	0.268856	0.122152	0.02512	0
48	0	0.359267	0.359267	0.323422	0.124511	0.088782	0.07185	0.026221
48	3	0.506363	0.506363	0.357282	0.119369	0.016986	0	0
48	6	0.408695	0.408695	0.36254	0.164702	0.048235	0.015828	0
48	15	0.440855	0.440855	0.329627	0.142464	0.048455	0.029443	0.009157
48	63	0.301005	0.301005	0.251031	0.131228	0.15193	0.103431	0.05089
48	63	0.39378	0.39378	0.287856	0.133629	0.077336	0.069592	0.026681
49	0	0.417597	0.417597	0.354083	0.159371	0.054627	0.014323	0
49	0	0.425397	0.425397	0.34447	0.159485	0.055335	0.015313	0
49	3	0.422347	0.422347	0.346533	0.159198	0.0562	0.015721	0
49	3	0.415473	0.415473	0.350143	0.162203	0.056852	0.015328	0
49	3	0.42519	0.42519	0.34225	0.161039	0.056335	0.015186	0
49	6	0.414151	0.414151	0.350882	0.161428	0.056781	0.016757	0
49	6	0.4221	0.4221	0.342277	0.163686	0.055997	0.01594	0
49	15	0.404399	0.404399	0.338607	0.165445	0.062897	0.021234	0.007418
49	15	0.410614	0.410614	0.339537	0.166312	0.063124	0.020413	0
49	63	0.376449	0.376449	0.323067	0.174525	0.081435	0.033293	0.01123
49	63	0.377879	0.377879	0.321839	0.172575	0.076497	0.034099	0.01711
50	0	0.353637	0.353637	0.373145	0.184609	0.069063	0.019655	-0.000108
50	0	0.429848	0.429848	0.356148	0.183904	0.0301	0	0
50	3	0.160927	0.160927	0.288676	0.260099	0.178218	0.093304	0.016045
50	3	0.18357	0.18357	0.298139	0.257433	0.17564	0.078395	0.006823
50	6	0.171817	0.171817	0.260592	0.240336	0.176898	0.105586	0.026988
50	6	0.1437	0.1437	0.254819	0.263923	0.212082	0.083128	0.023544
50	15	0.103556	0.103556	0.21203	0.259838	0.19614	0.112159	0.091235
50	63	0.671698	0.671698	0.313904	0.014397	0	0	0
51	0	0.177725	0.177725	0.320629	0.266227	0.149504	0.060251	0.018349
51	0	0.170446	0.170446	0.314749	0.271129	0.148755	0.065428	0.024834
51	3	0.198938	0.198938	0.295938	0.269368	0.143332	0.066761	0.020407
51	3	0.181237	0.181237	0.306769	0.274399	0.150187	0.060463	0.018391
51	3	0.180043	0.180043	0.305684	0.276499	0.151591	0.061083	0.02047
51	6	0.170586	0.170586	0.324511	0.269226	0.152881	0.06778	0.015015
51	6	0.169874	0.169874	0.315379	0.28345	0.147096	0.059536	0.020104
51	6	0.185152	0.185152	0.305024	0.261037	0.14864	0.074779	0.021019
51	15	0.174601	0.174601	0.29484	0.265541	0.158765	0.075144	0.020749
51	63	0.183739	0.183739	0.308758	0.250711	0.135845	0.079694	0.029763
51	63	0.17057	0.17057	0.306088	0.252246	0.148413	0.075566	0.033888
52	0	0.285288	0.285288	0.346337	0.219397	0.101854	0.036251	0.010873
52	0	0.280183	0.280183	0.34673	0.223559	0.100174	0.037665	0.011689
52	3	0.268012	0.268012	0.342544	0.23402	0.104473	0.038158	0.012793
52	3	0.275204	0.275204	0.34355	0.228514	0.103777	0.038444	0.010511
52	3	0.274986	0.274986	0.348004	0.223408	0.104674	0.038305	0.010623
52	6	0.271829	0.271829	0.342047	0.233982	0.105156	0.035331	0.011655
52	6	0.277256	0.277256	0.346374	0.218464	0.106551	0.038663	0.012693
52	6	0.269071	0.269071	0.351889	0.222503	0.109301	0.0346	0.012636
52	15	0.260182	0.260182	0.344445	0.226324	0.109127	0.044172	0.015749
52	15	0.270634	0.270634	0.336714	0.222259	0.111851	0.042827	0.015716
52	63	0.248961	0.248961	0.323563	0.224746	0.115728	0.053075	0.023846
52	63	0.240697	0.240697	0.317229	0.230577	0.117799	0.053033	0.026636
53	0	0.449436	0.449436	0.343093	0.148766	0.049022	0.009682	0
53	0	0.452093	0.452093	0.338678	0.15167	0.047646	0.009913	0
53	3	0.443559	0.443559	0.339653	0.15348	0.051419	0.011889	0
53	3	0.454422	0.454422	0.33901	0.147407	0.0472	0.011962	0
53	3	0.457656	0.457656	0.341884	0.1444	0.045707	0.010353	0
53	6	0.453141	0.453141	0.339013	0.146408	0.050968	0.01047	0
53	6	0.437443	0.437443	0.344964	0.156988	0.046452	0.014154	0
53	6	0.453939	0.453939	0.334378	0.147562	0.050999	0.013123	0
53	15	0.449814	0.449814	0.342039	0.147588	0.046956	0.013603	0
53	15	0.449072	0.449072	0.328719	0.150989	0.052349	0.018871	0
53	63	0.41374	0.41374	0.323031	0.161691	0.057307	0.027298	0.016933
53	63	0.412825	0.412825	0.335028	0.152927	0.059985	0.027002	0.012233
54	0	0.331878	0.331878	0.345687	0.20438	0.084019	0.027973	0.006064
54	0	0.336307	0.336307	0.340892	0.201992	0.085633	0.027779	0.007396
54	3	0.335584	0.335584	0.344088	0.200696	0.083508	0.026943	0.009181
54	3	0.331609	0.331609	0.351556	0.200473	0.086215	0.024842	0.005305
54	3	0.330768	0.330768	0.355896	0.1935	0.089947	0.02674	0.00315
54	6	0.32404	0.32404	0.34574	0.202608	0.087058	0.032249	0.008305
54	6	0.3242	0.3242	0.351247	0.203847	0.090126	0.025569	0.005012
54	6	0.314573	0.314573	0.351652	0.213013	0.098396	0.021502	0.000864
54	15	0.310993	0.310993	0.338155	0.216536	0.089624	0.034739	0.009954
54	15	0.304352	0.304352	0.341244	0.213476	0.090577	0.035745	0.014606
54	63	0.276827	0.276827	0.311343	0.20822	0.109817	0.052083	0.028309
54	63	0.274279	0.274279	0.313674	0.201407	0.110792	0.055819	0.028922
55	0	0.254684	0.254684	0.320921	0.258658	0.118241	0.036511	0.010984
55	3	0.234224	0.234224	0.336193	0.235392	0.118662	0.050468	0.024335
55	3	0.236398	0.236398	0.331212	0.254733	0.122973	0.044946	0.009739
55	6	0.0622484	0.062248	0.236921	0.305154	0.221286	0.117991	0.041492
55	6	0.255289	0.255289	0.33823	0.228968	0.115472	0.046472	0.015569
55	15	0.245696	0.245696	0.315889	0.212873	0.138824	0.065304	0.016688
55	15	0.24807	0.24807	0.288555	0.235474	0.125389	0.072139	0.022856
55	63	0.202294	0.202294	0.293137	0.214155	0.145775	0.075181	0.042414
55	63	0.191396	0.191396	0.277411	0.213354	0.140274	0.077691	0.04606
56	0	0.508888	0.508888	0.304353	0.121874	0.050281	0.014604	0
56	0	0.522147	0.522147	0.321521	0.13185	0.024481	0	0
56	3	0.514827	0.514827	0.317451	0.129449	0.03438	0.003893	0
56	3	0.478543	0.478543	0.346123	0.125771	0.041497	0.008067	0
56	3	0.501373	0.501373	0.335997	0.120774	0.03384	0.008015	0
56	6	0.504861	0.504861	0.339415	0.122804	0.026899	0.00602	0
56	6	0.508278	0.508278	0.343677	0.110919	0.030141	0.006985	0
56	6	0.506245	0.506245	0.328755	0.122487	0.032998	0.009514	0
56	15	0.525006	0.525006	0.29266	0.135233	0.039335	0.007766	0
56	15	0.49038	0.49038	0.335654	0.125439	0.038457	0.01007	0
56	63	0.481502	0.481502	0.322489	0.133552	0.04653	0.015926	0
56	63	0.469399	0.469399	0.324593	0.143219	0.048138	0.014651	0
57	0	0.518282	0.518282	0.328016	0.116426	0.030434	0.006842	0
57	0	0.51584	0.51584	0.328494	0.118454	0.031045	0.006167	0
57	3	0.513328	0.513328	0.326894	0.121281	0.031954	0.006542	0
57	3	0.511402	0.511402	0.328874	0.121084	0.031987	0.006653	0
57	3	0.513767	0.513767	0.330466	0.118527	0.030799	0.006441	0
57	6	0.507064	0.507064	0.332024	0.122067	0.032276	0.006569	0
57	6	0.506135	0.506135	0.331509	0.123108	0.032212	0.007036	0
57	6	0.501188	0.501188	0.334328	0.124044	0.033093	0.007348	0
57	15	0.491629	0.491629	0.335341	0.128824	0.035758	0.008448	0
57	15	0.492973	0.492973	0.333085	0.128801	0.036286	0.008854	0
57	63	0.469077	0.469077	0.335135	0.139194	0.043744	0.01285	0
57	63	0.465172	0.465172	0.329765	0.142862	0.047665	0.014536	0
58	0	0.357358	0.357358	0.343198	0.191381	0.07794	0.024609	0.005514
58	0	0.356295	0.356295	0.34855	0.196168	0.07444	0.021212	0.003336
58	3	0.366835	0.366835	0.344155	0.184565	0.075444	0.02543	0.003571
58	3	0.362729	0.362729	0.341815	0.191094	0.077339	0.024558	0.002465
58	6	0.36095	0.36095	0.350811	0.184046	0.073601	0.02421	0.006381
58	6	0.343625	0.343625	0.350045	0.196101	0.078202	0.028091	0.003936
58	6	0.34911	0.34911	0.346669	0.19781	0.075339	0.026	0.005071
58	15	0.341733	0.341733	0.342569	0.203726	0.075274	0.028807	0.007891
58	15	0.352443	0.352443	0.342597	0.182786	0.080231	0.031223	0.010721
58	63	0.32845	0.32845	0.334606	0.198663	0.082049	0.039906	0.016327
58	63	0.319695	0.319695	0.321624	0.194989	0.090317	0.042374	0.020588
59	0	0.28224	0.28224	0.339637	0.231009	0.102042	0.036027	0.009044
59	0	0.290171	0.290171	0.328055	0.224891	0.10469	0.040831	0.01136
59	3	0.288477	0.288477	0.328723	0.23005	0.097131	0.041852	0.013766
59	3	0.288283	0.288283	0.352947	0.215635	0.093248	0.037984	0.011904
59	3	0.285488	0.285488	0.340456	0.223116	0.101052	0.037036	0.012852
59	6	0.280848	0.280848	0.333743	0.228184	0.104019	0.042356	0.01085
59	6	0.281642	0.281642	0.336519	0.222521	0.103801	0.04214	0.013377
59	6	0.292396	0.292396	0.331734	0.217701	0.107168	0.038468	0.012533
59	15	0.27869	0.27869	0.330004	0.223841	0.109804	0.044676	0.012985
59	15	0.286814	0.286814	0.335519	0.2173	0.103284	0.042468	0.014616
59	63	0.261838	0.261838	0.321833	0.218817	0.115569	0.049387	0.02342
59	63	0.260211	0.260211	0.311623	0.218961	0.119984	0.05075	0.026566
60	3	0.050826	0.050826	0.249301	0.295415	0.226293	0.112192	0.045934
60	3	0.039929	0.039929	0.233403	0.312977	0.225775	0.118399	0.056366
60	6	0.0411	0.0411	0.251831	0.251458	0.246797	0.107089	0.026082
60	6	0.0543537	0.054354	0.245352	0.294196	0.220662	0.124138	0.048276
60	15	0.0648698	0.06487	0.233954	0.295952	0.197127	0.125477	0.050874
60	63	0.0703918	0.070392	0.202241	0.263682	0.198327	0.118289	0.069508
61	0	0.330417	0.330417	0.359331	0.197576	0.083894	0.024336	0.004446
61	0	0.324532	0.324532	0.354649	0.20321	0.084406	0.026042	0.007161
61	3	0.32736	0.32736	0.352751	0.204954	0.081145	0.028269	0.00552
61	3	0.325367	0.325367	0.347926	0.209806	0.084556	0.026176	0.00617
61	3	0.320424	0.320424	0.353894	0.205636	0.086982	0.027046	0.006018
61	6	0.322585	0.322585	0.3586	0.201661	0.084338	0.028061	0.004756
61	6	0.323618	0.323618	0.348697	0.207301	0.085508	0.027418	0.007458
61	6	0.310189	0.310189	0.344705	0.249975	0.081374	0.013757	0
61	15	0.322393	0.322393	0.350395	0.205742	0.085239	0.028184	0.008047
61	15	0.311771	0.311771	0.344623	0.210536	0.092771	0.032176	0.008123
61	63	0.308032	0.308032	0.339669	0.207574	0.095207	0.035656	0.013861
61	63	0.295773	0.295773	0.335815	0.208734	0.095426	0.038712	0.017788
62	3	0.136968	0.136968	0.233028	0.206242	0.153975	0.08716	0.034215
62	6	0.126347	0.126347	0.229403	0.263357	0.170141	0.07959	0.040851
62	15	0.126346	0.126346	0.249808	0.23697	0.144209	0.086944	0.027387
62	15	0.128296	0.128296	0.240718	0.230766	0.170916	0.076496	0.018349
62	63	0.140679	0.140679	0.268584	0.250525	0.17572	0.092327	0.027061
62	63	0.141428	0.141428	0.228278	0.232501	0.159112	0.079298	0.036109
63	0	0.143562	0.143562	0.266759	0.277097	0.181185	0.087232	0.036596
63	3	0.152788	0.152788	0.233677	0.274575	0.188301	0.100137	0.039276
63	6	0.162258	0.162258	0.270457	0.255967	0.162095	0.092931	0.043222
63	6	0.151105	0.151105	0.257957	0.276973	0.165924	0.097559	0.037225
63	15	0.153563	0.153563	0.25814	0.251006	0.189401	0.1035	0.032566
63	63	0.137294	0.137294	0.257374	0.255744	0.175254	0.101154	0.051644
63	63	0.120883	0.120883	0.253905	0.253766	0.172454	0.098841	0.049807
64	0	0.474034	0.474034	0.338209	0.137652	0.041399	0.008706	0
64	0	0.465945	0.465945	0.348179	0.136174	0.040686	0.009016	0
64	3	0.468949	0.468949	0.334827	0.14262	0.044141	0.009463	0
64	3	0.474772	0.474772	0.336885	0.138643	0.039903	0.009797	0
64	3	0.472373	0.472373	0.338825	0.140136	0.039178	0.009489	0
64	6	0.47835	0.47835	0.329774	0.136409	0.04422	0.011247	0
64	6	0.469759	0.469759	0.340104	0.136503	0.043909	0.009724	0
64	6	0.470702	0.470702	0.337306	0.135784	0.044523	0.011686	0
64	15	0.461668	0.461668	0.33781	0.144647	0.045411	0.010464	0
64	15	0.465737	0.465737	0.333097	0.144392	0.044962	0.011812	0
64	63	0.456487	0.456487	0.336466	0.143978	0.047813	0.015256	0
64	63	0.448189	0.448189	0.333158	0.149773	0.05198	0.016901	0
65	3	0.438567	0.438567	0.323851	0.170466	0.062684	0.004433	0
65	3	0.428138	0.428138	0.314342	0.153449	0.08238	0.021692	0
65	6	0.403005	0.403005	0.351788	0.171422	0.05926	0.014524	0
65	15	0.40934	0.40934	0.307456	0.160552	0.087129	0.02784	0.007684
65	15	0.409028	0.409028	0.305023	0.181183	0.073229	0.031629	-9.2e-05
65	63	0.302638	0.302638	0.168914	0.248425	0.2019	0.076223	0.001902
66	0	0.316069	0.316069	0.346989	0.209019	0.08939	0.029842	0.00869
66	0	0.316059	0.316059	0.347922	0.208224	0.089618	0.029419	0.008758
66	3	0.312843	0.312843	0.347299	0.208648	0.090745	0.031318	0.009147
66	3	0.313035	0.313035	0.348997	0.207034	0.090816	0.031124	0.008994
66	3	0.316144	0.316144	0.346902	0.209796	0.088179	0.03048	0.008498
66	6	0.312283	0.312283	0.346027	0.209095	0.090958	0.031936	0.009702
66	6	0.313092	0.313092	0.346919	0.209649	0.089765	0.030879	0.009696
66	6	0.312888	0.312888	0.345301	0.21091	0.089674	0.031697	0.00953
66	15	0.306766	0.306766	0.341587	0.20853	0.094729	0.035624	0.012764
66	15	0.3079	0.3079	0.341749	0.208733	0.093534	0.035826	0.012259
66	63	0.291365	0.291365	0.327043	0.2072	0.100742	0.044692	0.019758
66	63	0.285506	0.285506	0.321304	0.208167	0.102932	0.048521	0.022651
67	0	0.415761	0.415761	0.353074	0.161927	0.054385	0.014854	0
67	0	0.423115	0.423115	0.350559	0.158938	0.054145	0.013242	0
67	3	0.422955	0.422955	0.345514	0.159819	0.056835	0.014877	0
67	3	0.419046	0.419046	0.350107	0.160486	0.054604	0.015757	0
67	3	0.421428	0.421428	0.350219	0.160872	0.052333	0.015148	0
67	6	0.416923	0.416923	0.343707	0.164387	0.059025	0.015958	0
67	6	0.418989	0.418989	0.34927	0.160728	0.054121	0.016891	0
67	6	0.420154	0.420154	0.345083	0.162373	0.055958	0.016433	0
67	15	0.404881	0.404881	0.337919	0.161024	0.064661	0.023624	0.007891
67	15	0.401157	0.401157	0.343664	0.163178	0.0636	0.020782	0.00762
67	63	0.370601	0.370601	0.325419	0.171694	0.079785	0.036279	0.016222
67	63	0.358739	0.358739	0.323808	0.172618	0.083136	0.036916	0.017975
68	0	0.529781	0.529781	0.319397	0.115183	0.029424	0.006215	0
68	0	0.525073	0.525073	0.323168	0.114838	0.030691	0.00623	0
68	3	0.525474	0.525474	0.320369	0.117847	0.030096	0.006213	0
68	3	0.523316	0.523316	0.325165	0.114952	0.03018	0.006387	0
68	3	0.525957	0.525957	0.322674	0.114692	0.030184	0.006493	0
68	6	0.524631	0.524631	0.320241	0.116962	0.031521	0.006645	0
68	6	0.522074	0.522074	0.323671	0.11698	0.030543	0.006731	0
68	6	0.522894	0.522894	0.323189	0.115925	0.031305	0.006688	0
68	15	0.517284	0.517284	0.319829	0.120982	0.034111	0.007794	0
68	15	0.519075	0.519075	0.31958	0.120488	0.033265	0.007592	0
68	63	0.497497	0.497497	0.320135	0.130229	0.040516	0.011623	0
68	63	0.487892	0.487892	0.323434	0.133172	0.042779	0.012722	0
69	0	0.00144784	0.001448	0.303963	0.350291	0.210693	0.091845	0.032212
69	15	0.00190807	0.001908	0.282128	0.32644	0.215715	0.101071	0.045032
69	15	0.00170619	0.001706	0.2863	0.32866	0.210867	0.102156	0.042717
69	63	0.00184302	0.001843	0.252568	0.304353	0.203501	0.114905	0.06164
70	0	0.230798	0.230798	0.323341	0.239079	0.129441	0.053	0.018648
70	0	0.233272	0.233272	0.317716	0.241787	0.129178	0.054056	0.018306
70	3	0.229581	0.229581	0.316291	0.241166	0.129706	0.055948	0.020842
70	3	0.233823	0.233823	0.320231	0.238989	0.127526	0.053972	0.019162
70	3	0.232772	0.232772	0.318497	0.240776	0.127836	0.054766	0.019314
70	6	0.227983	0.227983	0.320263	0.23958	0.130734	0.054088	0.020356
70	6	0.22903	0.22903	0.321943	0.239005	0.128201	0.055632	0.019986
70	6	0.231147	0.231147	0.320415	0.239398	0.127032	0.054644	0.020119
70	15	0.22601	0.22601	0.314339	0.237003	0.127526	0.05909	0.024919
70	15	0.223677	0.223677	0.315273	0.239648	0.130288	0.05745	0.023749
70	63	0.216165	0.216165	0.299344	0.227386	0.129926	0.06335	0.032139
70	63	0.207767	0.207767	0.291192	0.224422	0.128228	0.064385	0.035227
71	3	0.00115452	0.001155	0.022538	0.214567	0.272826	0.147169	0.055016
71	15	0.00508705	0.005087	0.226672	0.295256	0.202376	0.119064	0.050458
71	15	0.00333602	0.003336	0.177291	0.287902	0.211177	0.104982	0.061603
71	63	0.0026856	0.002686	0.250539	0.291379	0.201563	0.124581	0.064747
72	0	0.286403	0.286403	0.356303	0.218245	0.110817	0.023582	0.00465
72	0	0.372992	0.372992	0.344826	0.179056	0.07455	0.023489	0.005087
72	3	0.278421	0.278421	0.357579	0.22862	0.098789	0.034901	0.00169
72	3	0.370597	0.370597	0.333998	0.188343	0.078865	0.021461	0.006736
72	3	0.372973	0.372973	0.338361	0.183726	0.077871	0.021665	0.005404
72	6	0.215091	0.215091	0.346753	0.255703	0.120948	0.051384	0.01012
72	6	0.365185	0.365185	0.346564	0.181705	0.071168	0.028689	0.006691
72	6	0.36989	0.36989	0.336032	0.184488	0.072064	0.028527	0.009001
72	15	0.360523	0.360523	0.335159	0.187308	0.081284	0.026711	0.009016
72	15	0.366189	0.366189	0.33622	0.188254	0.077192	0.024027	0.008118
72	63	0.361624	0.361624	0.314317	0.195208	0.08453	0.032083	0.012238
72	63	0.336621	0.336621	0.333651	0.192138	0.090232	0.035171	0.012187
73	0	0.535099	0.535099	0.315948	0.116694	0.027492	0.004766	0
73	0	0.524247	0.524247	0.327977	0.114445	0.028228	0.005102	0
73	3	0.515087	0.515087	0.324472	0.126096	0.03081	0.003535	0
73	3	0.514987	0.514987	0.320727	0.125929	0.030976	0.007381	0
73	3	0.522869	0.522869	0.324995	0.116649	0.030039	0.005448	0
73	6	0.522623	0.522623	0.325045	0.113272	0.034273	0.004787	0
73	6	0.510814	0.510814	0.327824	0.11955	0.035553	0.006259	0
73	6	0.512574	0.512574	0.324186	0.124681	0.03117	0.007389	0
73	15	0.499443	0.499443	0.332069	0.124886	0.034957	0.008645	0
73	15	0.506272	0.506272	0.328788	0.121292	0.035028	0.00862	0
73	63	0.486846	0.486846	0.329033	0.13105	0.042097	0.010974	0
73	63	0.485254	0.485254	0.335884	0.12824	0.038371	0.012252	0
74	0	0.353865	0.353865	0.355737	0.202669	0.063859	0.023631	0.000238
74	0	0.321128	0.321128	0.3856	0.212128	0.072124	0.009019	0
74	3	0.364879	0.364879	0.343167	0.216499	0.065953	0.009502	0
74	6	0.325305	0.325305	0.344299	0.215093	0.080042	0.031966	0.003295
74	15	0.269815	0.269815	0.412285	0.190981	0.118553	0.008366	0
74	63	0.138153	0.138153	0.463154	0.11046	0.189425	0.023597	0.072557
75	0	0.547523	0.547523	0.302034	0.124416	0.026028	0	0
75	0	0.512231	0.512231	0.350657	0.120514	0.016599	0	0
75	3	0.513873	0.513873	0.339307	0.123909	0.022911	0	0
75	3	0.558439	0.558439	0.319807	0.106166	0.015589	0	0
75	3	0.497353	0.497353	0.340794	0.121575	0.035449	0.00483	0
75	6	0.502622	0.502622	0.345355	0.123602	0.028384	3.6e-05	0
75	6	0.513979	0.513979	0.335952	0.129832	0.020237	0	0
75	6	0.523612	0.523612	0.316741	0.122054	0.033442	0.00415	0
75	15	0.508199	0.508199	0.320466	0.14777	0.023564	0	0
75	15	0.51444	0.51444	0.31741	0.124173	0.03896	0.005017	0
75	63	0.486883	0.486883	0.327676	0.129303	0.045162	0.010976	0
75	63	0.462776	0.462776	0.335065	0.139565	0.04955	0.013044	0
76	3	0.338776	0.338776	0.324644	0.198033	0.104847	0.025348	0.008352
76	3	0.324914	0.324914	0.355651	0.203883	0.087118	0.028434	0
76	3	0.379209	0.379209	0.399097	0.164736	0.057363	-0.000406	0
76	6	0.305573	0.305573	0.383289	0.162823	0.104415	0.021095	0.022805
76	6	0.341673	0.341673	0.343563	0.19426	0.096985	0.018086	0.005433
76	6	0.319255	0.319255	0.310797	0.214098	0.111387	0.029674	0.014788
76	15	0.323155	0.323155	0.334307	0.221089	0.086503	0.026641	0.008305
76	15	0.275564	0.275564	0.32005	0.239528	0.107466	0.041764	0.015627
76	63	0.416364	0.416364	0.305745	0.224188	0.045929	0.007774	0
76	63	0.302202	0.302202	0.337213	0.216813	0.104676	0.016941	0.017296
77	0	0.519493	0.519493	0.329715	0.11392	0.030714	0.006159	0
77	0	0.519528	0.519528	0.325319	0.117899	0.030472	0.006782	0
77	3	0.512565	0.512565	0.329858	0.117165	0.033695	0.006718	0
77	3	0.512278	0.512278	0.329937	0.120167	0.031564	0.006054	0
77	3	0.516029	0.516029	0.328634	0.118506	0.031036	0.005796	0
77	6	0.506566	0.506566	0.330198	0.121427	0.034205	0.007604	0
77	6	0.506708	0.506708	0.330792	0.121959	0.033026	0.007515	0
77	6	0.510138	0.510138	0.328794	0.122447	0.031928	0.006692	0
77	15	0.495421	0.495421	0.328814	0.129871	0.03691	0.008984	0
77	15	0.496817	0.496817	0.330568	0.127761	0.036058	0.008796	0
77	63	0.474231	0.474231	0.33182	0.137332	0.043692	0.012924	0
77	63	0.469249	0.469249	0.329729	0.139254	0.047878	0.01389	0
78	0	0.523819	0.523819	0.323315	0.115831	0.030725	0.006309	0
78	0	0.520744	0.520744	0.328375	0.114162	0.030411	0.006309	0
78	3	0.520006	0.520006	0.326082	0.116542	0.030936	0.006434	0
78	3	0.520298	0.520298	0.325997	0.116093	0.030565	0.007048	0
78	3	0.518471	0.518471	0.327162	0.116772	0.031124	0.006472	0
78	6	0.52538	0.52538	0.322041	0.116036	0.029869	0.006673	0
78	6	0.521677	0.521677	0.322756	0.117588	0.031163	0.006815	0
78	6	0.517784	0.517784	0.328028	0.116061	0.031375	0.006752	0
78	15	0.513901	0.513901	0.325357	0.119494	0.033826	0.007422	0
78	15	0.514375	0.514375	0.327156	0.118181	0.032059	0.008229	0
78	63	0.500267	0.500267	0.324381	0.126769	0.038471	0.010111	0
78	63	0.494277	0.494277	0.320873	0.131896	0.041465	0.01149	0
79	0	0.504634	0.504634	0.320872	0.118149	0.034199	0.022146	0
79	0	0.499205	0.499205	0.308106	0.132242	0.037883	0.022564	0
79	3	0.483981	0.483981	0.298549	0.127881	0.037451	0.036066	0.016071
79	3	0.496357	0.496357	0.313442	0.132322	0.03884	0.019039	0
79	3	0.502717	0.502717	0.305837	0.129447	0.039368	0.022631	0
79	6	0.485616	0.485616	0.312306	0.123686	0.034158	0.030303	0.013932
79	6	0.487408	0.487408	0.312487	0.13805	0.038973	0.023082	0
79	6	0.490832	0.490832	0.30673	0.128471	0.035513	0.025553	0.012899
79	15	0.470933	0.470933	0.300334	0.140497	0.045477	0.029231	0.013527
79	15	0.483049	0.483049	0.314343	0.140154	0.043078	0.019375	0
79	63	0.462313	0.462313	0.294875	0.144237	0.04907	0.034817	0.014686
79	63	0.421729	0.421729	0.287308	0.169773	0.065923	0.038728	0.01654
80	0	0.417597	0.417597	0.354083	0.159371	0.054627	0.014323	0
80	0	0.425397	0.425397	0.34447	0.159485	0.055335	0.015313	0
80	3	0.422347	0.422347	0.346533	0.159198	0.0562	0.015721	0
80	3	0.415473	0.415473	0.350143	0.162203	0.056852	0.015328	0
80	3	0.42519	0.42519	0.34225	0.161039	0.056335	0.015186	0
80	6	0.414151	0.414151	0.350882	0.161428	0.056781	0.016757	0
80	6	0.4221	0.4221	0.342277	0.163686	0.055997	0.01594	0
80	6	0.417194	0.417194	0.346313	0.161962	0.058887	0.015644	0
80	15	0.404399	0.404399	0.338607	0.165445	0.062897	0.021234	0.007418
80	15	0.410614	0.410614	0.339537	0.166312	0.063124	0.020413	0
80	63	0.385917	0.385917	0.326763	0.166771	0.074895	0.032152	0.013503
80	63	0.377879	0.377879	0.321839	0.172575	0.076497	0.034099	0.01711
81	0	0.382952	0.382952	0.330572	0.222172	0.05668	0.007624	0
81	0	0.35113	0.35113	0.338708	0.215298	0.088531	0.006333	0
81	3	0.341522	0.341522	0.35667	0.218109	0.07519	0.008509	0
81	3	0.346027	0.346027	0.345791	0.22673	0.070771	0.010682	0
81	3	0.350913	0.350913	0.428345	0.165863	0.054879	0	0
81	6	0.3429	0.3429	0.370849	0.208448	0.065712	0.012091	0
81	6	0.345811	0.345811	0.357741	0.211304	0.083769	0.001375	0
81	15	0.339997	0.339997	0.410853	0.193327	0.043914	0.011909	0
81	15	0.349838	0.349838	0.329515	0.227801	0.080778	0.012067	0
81	63	0.322416	0.322416	0.368501	0.213944	0.078856	0.016283	0
81	63	0.301312	0.301312	0.345195	0.214393	0.098144	0.032108	0.008848
82	0	0.0747586	0.074759	0.259069	0.282573	0.221252	0.104697	0.048878
82	3	0.00905568	0.009056	0.012655	0.215349	0.282994	0.196486	0.100218
82	6	0.0543537	0.054354	0.245352	0.294196	0.220662	0.124138	0.048276
82	15	0.245696	0.245696	0.315889	0.212873	0.138824	0.065304	0.016688
83	0	0.452058	0.452058	0.358765	0.159864	0.022619	0.006693	0
83	3	0.545205	0.545205	0.321005	0.13379	0	0	0
83	6	0.443549	0.443549	0.347316	0.166153	0.042981	0	0
83	63	0.398533	0.398533	0.352708	0.213463	0.031371	0.003925	0
84	0	0.468349	0.468349	0.33432	0.141153	0.047745	0.008433	0
84	0	0.476058	0.476058	0.338306	0.135483	0.040575	0.009578	0
84	3	0.473984	0.473984	0.333094	0.141347	0.041599	0.009976	0
84	3	0.47672	0.47672	0.327396	0.145918	0.040911	0.009055	0
84	3	0.476185	0.476185	0.33336	0.137866	0.042496	0.010093	0
84	6	0.470307	0.470307	0.336972	0.138448	0.044134	0.010139	0
84	6	0.475226	0.475226	0.33004	0.1433	0.041707	0.009727	0
84	6	0.476685	0.476685	0.33969	0.132202	0.042033	0.009389	0
84	15	0.467	0.467	0.330556	0.14273	0.046172	0.013543	0
84	15	0.470894	0.470894	0.327061	0.140403	0.052616	0.009025	0
84	63	0.452363	0.452363	0.333057	0.146035	0.053328	0.015216	0
84	63	0.447521	0.447521	0.328831	0.152902	0.054168	0.016578	0
85	3	0.322874	0.322874	0.335212	0.21432	0.090867	0.02864	0.008087
85	6	0.322909	0.322909	0.35306	0.188779	0.089019	0.037988	0.008245
85	15	0.287193	0.287193	0.360271	0.211513	0.093332	0.040437	0.007255
85	63	0.277034	0.277034	0.320725	0.223338	0.10586	0.044591	0.018437
86	0	0.442605	0.442605	0.341815	0.153485	0.049517	0.012578	0
86	0	0.446612	0.446612	0.338815	0.150842	0.050614	0.013117	0
86	3	0.438778	0.438778	0.341066	0.154918	0.051436	0.013802	0
86	3	0.439118	0.439118	0.34204	0.155378	0.050858	0.012607	0
86	3	0.447364	0.447364	0.339703	0.151947	0.048351	0.012634	0
86	6	0.443264	0.443264	0.343458	0.150624	0.049921	0.012733	0
86	6	0.442742	0.442742	0.342447	0.151188	0.050499	0.013123	0
86	6	0.438605	0.438605	0.346546	0.15039	0.05114	0.013319	0
86	15	0.439758	0.439758	0.338825	0.150834	0.055512	0.01507	0
86	15	0.437994	0.437994	0.336274	0.155118	0.053703	0.01691	0
86	63	0.424416	0.424416	0.336716	0.15945	0.058447	0.020971	0
86	63	0.409127	0.409127	0.334406	0.162875	0.062763	0.023152	0.007676
87	0	0.404731	0.404731	0.339792	0.198139	0.051292	0.006046	0
87	6	0.345945	0.345945	0.399703	0.180185	0.067291	0.006876	0
87	6	0.388711	0.388711	0.349517	0.193737	0.054838	0.013197	0
87	6	0.276482	0.276482	0.276924	0.140691	0.051643	0.014262	0.080529
87	15	0.165426	0.165426	0.162344	0.102448	0.046479	0.011368	0.163979
87	63	0.319993	0.319993	0.318677	0.194561	0.088025	0.045207	0.021429
88	0	0.00141712	0.001417	0.303746	0.350284	0.213854	0.090695	0.030613
88	0	0.0012304	0.00123	0.30937	0.34558	0.208357	0.094307	0.032189
88	3	0.00114553	0.001146	0.303771	0.349373	0.213966	0.091467	0.030968
88	3	0.00122848	0.001228	0.303574	0.344043	0.216153	0.093689	0.032063
88	3	0.00123402	0.001234	0.303981	0.344831	0.214571	0.094486	0.032026
88	6	0.00130211	0.001302	0.29955	0.34984	0.214653	0.092764	0.031923
88	6	0.00117625	0.001176	0.304035	0.342416	0.215071	0.095164	0.032702
88	6	0.00116443	0.001164	0.306069	0.340614	0.214893	0.095262	0.032536
88	15	0.00126366	0.001264	0.301864	0.341517	0.211126	0.09664	0.035834
88	15	0.0011849	0.001185	0.299707	0.342923	0.212433	0.095855	0.036061
88	63	0.00119145	0.001191	0.295635	0.340023	0.210192	0.096652	0.040581
88	63	0.00134915	0.001349	0.284476	0.332233	0.208822	0.099076	0.044667
89	0	0.227119	0.227119	0.33665	0.243388	0.12523	0.048362	0.017544
89	3	0.21966	0.21966	0.332651	0.244522	0.125197	0.055461	0.019379
89	6	0.223376	0.223376	0.331543	0.245057	0.130397	0.045939	0.01721
89	6	0.224984	0.224984	0.329061	0.245497	0.123993	0.051562	0.019105
89	6	0.242203	0.242203	0.306515	0.255344	0.12898	0.048273	0.016972
89	15	0.202055	0.202055	0.314921	0.270505	0.12344	0.056875	0.025743
89	15	0.20917	0.20917	0.340694	0.244473	0.120373	0.056109	0.023154
89	63	0.213936	0.213936	0.304873	0.237399	0.134371	0.059735	0.024709
89	63	0.1968	0.1968	0.302776	0.235503	0.131044	0.062352	0.036157
90	0	0.536113	0.536113	0.262661	0.109891	0.053231	0.037438	0.000667
90	0	0.383975	0.383975	0.17817	0.053665	0.234832	0.127245	0.022176
90	3	0.538169	0.538169	0.211543	0.07306	0.090454	0.070193	0.016582
90	3	0.552905	0.552905	0.262438	0.073386	0.058343	0.0523	0.000628
90	3	0.390147	0.390147	0.188893	0.062604	0.212311	0.135402	0.010643
90	6	0.513746	0.513746	0.217037	0.054768	0.135924	0.071286	0.007239
90	15	0.412999	0.412999	0.183523	0.064771	0.216053	0.109962	0.012692
90	15	0.526261	0.526261	0.258581	0.107283	0.069155	0.034985	0.003736
90	63	0.317849	0.317849	0.170138	0.048093	0.245921	0.184854	0.030391
90	63	0.495409	0.495409	0.315414	0.063378	0.063819	0.057168	0.004813
91	0	0.010674	0.010674	0.007205	0.198614	0.2862	0.236851	0.144134
91	0	0.146901	0.146901	0.226232	0.184902	0.110218	0.101864	0.098284
91	3	0.00865237	0.008652	0.13722	0.265463	0.227867	0.199839	0.104074
91	3	0.00575785	0.005758	0.019993	0.182223	0.299085	0.248001	0.139045
91	6	0.145729	0.145729	0.232747	0.186793	0.112781	0.09602	0.09571
91	63	0.131292	0.131292	0.193805	0.166228	0.120696	0.100185	0.099057
91	63	0.0116103	0.01161	0.133125	0.231883	0.219178	0.162793	0.111371
92	3	0.283035	0.283035	0.364954	0.24302	0.057029	0.038022	0.013939
92	6	0.329798	0.329798	0.349147	0.248364	0.063939	0.008752	0
92	15	0.211023	0.211023	0.260597	0.172238	0.077836	0.031059	0.0921
92	63	0.265711	0.265711	0.302404	0.107862	0.086531	0.018916	0.084787
93	0	0.501262	0.501262	0.347181	0.113016	0.031262	0.007279	0
93	3	0.497203	0.497203	0.340193	0.12541	0.032705	0.00449	0
93	3	0.51158	0.51158	0.345356	0.118409	0.024655	0	0
93	3	0.504417	0.504417	0.340527	0.117425	0.034017	0.003614	0
93	6	0.496586	0.496586	0.350082	0.120817	0.03042	0.002095	0
93	6	0.51859	0.51859	0.322878	0.126768	0.029234	0.002529	0
93	15	0.498007	0.498007	0.330121	0.125862	0.042843	0.003166	0
93	15	0.482708	0.482708	0.340119	0.130281	0.039352	0.007539	0
93	63	0.475109	0.475109	0.339201	0.131186	0.044217	0.010288	0
93	63	0.468475	0.468475	0.346232	0.131345	0.043678	0.010269	0
94	0	0.596682	0.596682	0.299415	0.086899	0.017004	0	0
94	3	0.59571	0.59571	0.296479	0.087849	0.019962	0	0
94	3	0.5969	0.5969	0.298494	0.085889	0.018718	0	0
94	3	0.59862	0.59862	0.297951	0.085196	0.018234	0	0
94	6	0.599995	0.599995	0.294839	0.086749	0.018417	0	0
94	6	0.596357	0.596357	0.298259	0.085792	0.019592	0	0
94	6	0.593587	0.593587	0.299075	0.087966	0.019373	0	0
94	15	0.59108	0.59108	0.295558	0.092342	0.02102	0	0
94	15	0.591919	0.591919	0.29835	0.089411	0.020321	0	0
94	63	0.570884	0.570884	0.305314	0.097394	0.026408	0	0
94	63	0.562055	0.562055	0.299455	0.103285	0.028295	0.006911	0
95	0	0.409535	0.409535	0.35759	0.195104	0.033271	0.004499	0
95	3	0.416576	0.416576	0.354307	0.162441	0.051867	0.014808	0
95	15	0.373592	0.373592	0.300802	0.15032	0.047766	0.050564	0.050715
95	15	0.444451	0.444451	0.326251	0.18864	0.02622	0.014437	0
95	63	0.369398	0.369398	0.381973	0.171013	0.067311	0.010305	0
95	63	0.357807	0.357807	0.359866	0.177125	0.078855	0.022308	0.004039
96	0	0.50379	0.50379	0.304902	0.137052	0.042171	0.012084	0
96	0	0.492743	0.492743	0.316202	0.13253	0.046216	0.012309	0
96	3	0.485242	0.485242	0.300065	0.152675	0.048955	0.013062	0
96	3	0.495407	0.495407	0.300544	0.143271	0.046504	0.014274	0
96	6	0.490445	0.490445	0.297596	0.146931	0.050911	0.014118	0
96	6	0.496634	0.496634	0.293402	0.143723	0.051075	0.015166	0
96	6	0.463623	0.463623	0.29395	0.163363	0.059056	0.020008	0
96	15	0.471669	0.471669	0.306891	0.14641	0.059793	0.015237	0
96	15	0.472499	0.472499	0.308835	0.151774	0.053189	0.013704	0
96	63	0.442053	0.442053	0.314293	0.168393	0.060563	0.014698	0
96	63	0.443033	0.443033	0.31708	0.153157	0.066196	0.020534	0
97	0	0.00127148	0.001271	0.299978	0.351533	0.211343	0.093805	0.032582
97	0	0.0017562	0.001756	0.298514	0.350414	0.211757	0.097749	0.031593
97	3	0.00161669	0.001617	0.293467	0.348679	0.216738	0.095108	0.035043
97	3	0.0013376	0.001338	0.302004	0.340918	0.21537	0.095598	0.034216
97	3	0.00132854	0.001329	0.304142	0.344219	0.212765	0.095089	0.032725
97	6	0.000886453	0.000886	0.301705	0.345049	0.214213	0.093221	0.033733
97	6	0.00130324	0.001303	0.297101	0.339856	0.21821	0.098289	0.033142
97	6	0.00143568	0.001436	0.296637	0.341358	0.215806	0.097389	0.03503
97	15	0.00146994	0.00147	0.288419	0.325666	0.215301	0.10302	0.041333
97	15	0.00126074	0.001261	0.282815	0.333135	0.207326	0.105177	0.044202
97	63	0.00188703	0.001887	0.253606	0.302278	0.206475	0.116519	0.062243
97	63	0.00199665	0.001997	0.243307	0.295536	0.202772	0.121804	0.068563
98	0	0.253554	0.253554	0.34089	0.225536	0.11838	0.046655	0.014985
98	3	0.259289	0.259289	0.33323	0.224586	0.114111	0.047497	0.016976
98	6	0.238492	0.238492	0.314688	0.234645	0.11204	0.059677	0.016098
98	63	0.197898	0.197898	0.25252	0.210596	0.121332	0.087152	0.056475
99	3	0.322126	0.322126	0.369319	0.210997	0.080416	0.017142	0
99	15	0.32625	0.32625	0.330687	0.233311	0.109751	0	0
99	15	0.371133	0.371133	0.32805	0.211704	0.08842	0.000692	0
99	63	0.244581	0.244581	0.368517	0.284894	0.104343	-0.002335	0
99	63	0.309396	0.309396	0.336178	0.182085	0.101092	0.06036	0.010888
100	3	0.228162	0.228162	0.294246	0.307762	0.138231	0.026795	0.004805
100	3	0.20368	0.20368	0.351474	0.257301	0.155407	0.032138	0
100	6	0.206395	0.206395	0.282414	0.258177	0.138963	0.030369	0.018197
100	15	0.233715	0.233715	0.332505	0.248063	0.139685	0.036012	0.01002
100	63	0.182845	0.182845	0.336643	0.277202	0.165162	0.038149	0
101	0	0.407071	0.407071	0.357241	0.165407	0.054767	0.015515	0
101	0	0.411566	0.411566	0.349701	0.166835	0.056901	0.014996	0
101	3	0.404333	0.404333	0.358748	0.159955	0.059994	0.016971	0
101	3	0.411593	0.411593	0.346641	0.166243	0.060505	0.015019	0
101	3	0.407204	0.407204	0.350591	0.16754	0.058192	0.016472	0
101	6	0.406502	0.406502	0.351862	0.169351	0.055563	0.016722	0
101	6	0.408707	0.408707	0.351839	0.164489	0.059413	0.015551	0
101	6	0.408651	0.408651	0.351971	0.166416	0.055977	0.016985	0
101	15	0.403708	0.403708	0.345336	0.171973	0.060589	0.018394	0
101	15	0.400682	0.400682	0.355115	0.168926	0.057164	0.018113	0
101	63	0.39412	0.39412	0.337308	0.175732	0.063875	0.021776	0.00719
101	63	0.381162	0.381162	0.338375	0.171226	0.071093	0.027196	0.010948
102	0	0.597831	0.597831	0.299922	0.083003	0.019244	0	0
102	0	0.598744	0.598744	0.297019	0.082625	0.021612	0	0
102	3	0.593126	0.593126	0.300395	0.084645	0.021834	0	0
102	3	0.590898	0.590898	0.303295	0.086856	0.018951	0	0
102	3	0.595447	0.595447	0.29866	0.085819	0.020074	0	0
102	6	0.591512	0.591512	0.296923	0.089399	0.022166	0	0
102	6	0.592579	0.592579	0.298611	0.086984	0.021826	0	0
102	6	0.593183	0.593183	0.294692	0.090724	0.021401	0	0
102	15	0.588291	0.588291	0.298449	0.091402	0.021858	0	0
102	15	0.587319	0.587319	0.300037	0.088983	0.023661	0	0
102	63	0.570858	0.570858	0.293173	0.09819	0.032777	0.005002	0
102	63	0.555697	0.555697	0.303973	0.101185	0.031939	0.007206	0
103	0	0.310164	0.310164	0.357005	0.210773	0.085866	0.029083	0.007109
103	0	0.306337	0.306337	0.359954	0.204513	0.090608	0.030234	0.008355
103	3	0.306862	0.306862	0.353604	0.21059	0.092953	0.027095	0.008897
103	3	0.306827	0.306827	0.357444	0.210552	0.090673	0.028361	0.006143
103	3	0.306408	0.306408	0.360768	0.210562	0.08727	0.029406	0.005586
103	6	0.307295	0.307295	0.359942	0.208837	0.086573	0.030101	0.007253
103	6	0.30647	0.30647	0.359961	0.209238	0.088768	0.028111	0.007452
103	6	0.309691	0.309691	0.349843	0.208791	0.093838	0.031509	0.006328
103	15	0.302425	0.302425	0.348636	0.209679	0.09627	0.030481	0.01251
103	63	0.289445	0.289445	0.328878	0.214844	0.100703	0.03999	0.0181
103	63	0.280347	0.280347	0.334576	0.204132	0.10477	0.046604	0.019134
104	0	0.443036	0.443036	0.347497	0.150088	0.046499	0.01288	0
104	0	0.439957	0.439957	0.347151	0.150432	0.049581	0.012879	0
104	3	0.433453	0.433453	0.34835	0.156629	0.048095	0.013473	0
104	3	0.437738	0.437738	0.344958	0.155376	0.049929	0.011998	0
104	3	0.439763	0.439763	0.343253	0.155301	0.049564	0.012119	0
104	6	0.436334	0.436334	0.344974	0.154801	0.050655	0.013237	0
104	6	0.427813	0.427813	0.349891	0.158457	0.050873	0.012966	0
104	6	0.434198	0.434198	0.345267	0.156434	0.051385	0.012716	0
104	15	0.419911	0.419911	0.343125	0.162315	0.057162	0.017487	0
104	15	0.423112	0.423112	0.344519	0.158415	0.057521	0.016433	0
104	63	0.391284	0.391284	0.332672	0.168861	0.067476	0.029361	0.010346
104	63	0.38524	0.38524	0.325114	0.171128	0.077357	0.030207	0.010955
105	0	0.492459	0.492459	0.357745	0.149796	0	0	0
105	0	0.449362	0.449362	0.355732	0.157769	0.037137	0	0
105	3	0.523832	0.523832	0.32298	0.153188	0	0	0
105	3	0.417376	0.417376	0.337303	0.16616	0.061999	0.017162	0
105	6	0.590585	0.590585	0.319213	0.058461	0.031741	0	0
105	6	0.424755	0.424755	0.33084	0.164339	0.061086	0.018978	0
105	6	0.418604	0.418604	0.332669	0.167219	0.062875	0.018634	0
105	15	0.412402	0.412402	0.332389	0.169104	0.065609	0.020495	0
105	63	0.39942	0.39942	0.334478	0.175783	0.073883	0.016435	0
105	63	0.324893	0.324893	0.32698	0.203643	0.101313	0.030144	0.013027
106	0	0.180874	0.180874	0.303473	0.258094	0.164181	0.072269	0.016357
106	0	0.18615	0.18615	0.295314	0.276218	0.153279	0.062092	0.020003
106	3	0.190981	0.190981	0.340355	0.261571	0.120755	0.072473	0.013865
106	6	0.198178	0.198178	0.287237	0.289451	0.152609	0.058903	0.013623
106	15	0.192472	0.192472	0.342828	0.238057	0.138431	0.061164	0.021573
106	63	0.166527	0.166527	0.290661	0.248402	0.148941	0.08187	0.050224
107	0	0.0133098	0.01331	0.304482	0.352654	0.198597	0.09512	0.028554
107	3	0.00181913	0.001819	0.301823	0.343173	0.213911	0.095177	0.033417
107	3	0.00171678	0.001717	0.303329	0.346926	0.211907	0.092989	0.033083
107	6	0.0337956	0.033796	0.339078	0.318544	0.183838	0.101107	0.02313
107	6	0.00175414	0.001754	0.302901	0.340913	0.211629	0.096087	0.035063
107	63	0.00184302	0.001843	0.252568	0.304353	0.203501	0.114905	0.06164
108	0	0.256425	0.256425	0.289585	0.254504	0.112486	0.041831	0.035498
108	0	0.212483	0.212483	0.313368	0.223651	0.133336	0.050449	0.054696
108	3	0.220825	0.220825	0.298231	0.222287	0.140664	0.054731	0.056633
108	3	0.230544	0.230544	0.274268	0.211506	0.113286	0.054113	0.065354
108	6	0.256957	0.256957	0.296279	0.221481	0.125183	0.051825	0.026544
108	6	0.210788	0.210788	0.304225	0.225769	0.145453	0.056722	0.029933
108	15	0.20222	0.20222	0.315226	0.236574	0.113653	0.065245	0.059491
108	15	0.207794	0.207794	0.282121	0.212002	0.13352	0.067272	0.090441
108	63	0.216244	0.216244	0.300649	0.224231	0.135749	0.055389	0.041306
108	63	0.193191	0.193191	0.267825	0.211798	0.128808	0.074646	0.04269
109	0	0.0290187	0.029019	0.322809	0.313705	0.203489	0.0887	0.03081
109	0	0.0106012	0.010601	0.308723	0.352504	0.193571	0.090807	0.033373
109	3	0.0131097	0.01311	0.3229	0.319864	0.203068	0.09617	0.03429
109	3	0.00131674	0.001317	0.303602	0.357511	0.206638	0.091004	0.031162
109	3	0.00149803	0.001498	0.303512	0.356991	0.206324	0.091251	0.032094
109	6	0.0015052	0.001505	0.310797	0.340195	0.213964	0.093442	0.030744
109	6	0.00141915	0.001419	0.302438	0.357149	0.205304	0.09259	0.032053
109	6	0.0145946	0.014595	0.306838	0.351583	0.191705	0.091101	0.034496
109	15	0.00148373	0.001484	0.301927	0.347722	0.211136	0.094668	0.031771
109	63	0.00842567	0.008426	0.306807	0.322649	0.207527	0.101277	0.037785
109	63	0.0121752	0.012175	0.298775	0.310963	0.207019	0.100427	0.042153
110	0	0.00145015	0.00145	0.312404	0.341342	0.213684	0.093169	0.029079
110	0	0.0106012	0.010601	0.308723	0.352504	0.193571	0.090807	0.033373
110	3	0.0131097	0.01311	0.3229	0.319864	0.203068	0.09617	0.03429
110	3	0.00131674	0.001317	0.303602	0.357511	0.206638	0.091004	0.031162
110	3	0.00149803	0.001498	0.303512	0.356991	0.206324	0.091251	0.032094
110	6	0.0015052	0.001505	0.310797	0.340195	0.213964	0.093442	0.030744
110	6	0.00141915	0.001419	0.302438	0.357149	0.205304	0.09259	0.032053
110	6	0.00112367	0.001124	0.302454	0.35577	0.207911	0.091613	0.032501
110	15	0.00141522	0.001415	0.299435	0.350525	0.208873	0.093862	0.034713
110	15	0.00148373	0.001484	0.301927	0.347722	0.211136	0.094668	0.031771
110	63	0.00136139	0.001361	0.298886	0.332749	0.215091	0.100158	0.03641
110	63	0.00145191	0.001452	0.289461	0.328442	0.213915	0.102007	0.039278
111	0	0.417597	0.417597	0.354083	0.159371	0.054627	0.014323	0
111	0	0.425397	0.425397	0.34447	0.159485	0.055335	0.015313	0
111	3	0.422347	0.422347	0.346533	0.159198	0.0562	0.015721	0
111	3	0.42519	0.42519	0.34225	0.161039	0.056335	0.015186	0
111	6	0.414151	0.414151	0.350882	0.161428	0.056781	0.016757	0
111	6	0.4221	0.4221	0.342277	0.163686	0.055997	0.01594	0
111	6	0.417194	0.417194	0.346313	0.161962	0.058887	0.015644	0
111	15	0.404399	0.404399	0.338607	0.165445	0.062897	0.021234	0.007418
111	15	0.410614	0.410614	0.339537	0.166312	0.063124	0.020413	0
111	63	0.385917	0.385917	0.326763	0.166771	0.074895	0.032152	0.013503
111	63	0.377879	0.377879	0.321839	0.172575	0.076497	0.034099	0.01711
112	0	0.424707	0.424707	0.349626	0.159822	0.051236	0.014609	0
112	0	0.418892	0.418892	0.35481	0.160223	0.05222	0.013855	0
112	3	0.422544	0.422544	0.352137	0.157973	0.053705	0.013641	0
112	3	0.421147	0.421147	0.352456	0.159497	0.052517	0.014383	0
112	3	0.420907	0.420907	0.349519	0.161676	0.055195	0.012704	0
112	6	0.421899	0.421899	0.35041	0.159336	0.054242	0.014112	0
112	6	0.419914	0.419914	0.349245	0.161081	0.055333	0.014426	0
112	6	0.423102	0.423102	0.348082	0.160922	0.053363	0.014531	0
112	15	0.417985	0.417985	0.345343	0.163326	0.057535	0.015811	0
112	15	0.417223	0.417223	0.345345	0.163014	0.057128	0.017289	0
112	63	0.409667	0.409667	0.34328	0.163962	0.063297	0.019795	0
112	63	0.39766	0.39766	0.340426	0.163915	0.065948	0.023442	0.008608
113	0	0.260561	0.260561	0.363792	0.212935	0.111973	0.039337	0.011402
113	0	0.279682	0.279682	0.336957	0.211216	0.112164	0.045549	0.014432
113	3	0.255583	0.255583	0.342485	0.230101	0.118021	0.043402	0.010409
113	3	0.26671	0.26671	0.336575	0.228353	0.115809	0.038616	0.013938
113	3	0.26884	0.26884	0.339763	0.242037	0.099022	0.036827	0.013511
113	6	0.00268748	0.002687	0.282357	0.325529	0.227311	0.104109	0.04327
113	6	0.267399	0.267399	0.343433	0.242349	0.092751	0.03965	0.014418
113	6	0.280488	0.280488	0.339023	0.220674	0.108191	0.04153	0.010095
113	15	0.249015	0.249015	0.343932	0.237318	0.105834	0.047618	0.016284
113	15	0.264216	0.264216	0.330697	0.23664	0.108609	0.046638	0.013199
113	63	0.252738	0.252738	0.32261	0.230826	0.112945	0.047467	0.024294
114	0	0.0606899	0.06069	0.091492	0.070038	0.04112	0.162832	0.23177
114	0	0.146901	0.146901	0.226232	0.184902	0.110218	0.101864	0.098284
114	3	0.0565935	0.056594	0.091978	0.083133	0.035935	0.161346	0.235329
114	3	0.136416	0.136416	0.205362	0.178515	0.095684	0.106177	0.117019
114	3	0.0815625	0.081562	0.127557	0.10037	0.056846	0.143932	0.192442
114	6	0.0535302	0.05353	0.087612	0.078228	0.041061	0.162646	0.221614
114	6	0.121052	0.121052	0.196571	0.176739	0.096719	0.113842	0.119325
114	6	0.0305494	0.030549	0.045783	0.040696	0.02467	0.184759	0.25675
114	15	0.101066	0.101066	0.156972	0.139544	0.07845	0.118703	0.14031
114	15	0.132912	0.132912	0.205426	0.170941	0.105829	0.09765	0.09753
114	63	0.122492	0.122492	0.187539	0.164484	0.12101	0.106749	0.100456
115	0	0.220874	0.220874	0.308813	0.20749	0.149725	0.05453	0.035409
115	0	0.218202	0.218202	0.316412	0.243744	0.12299	0.070526	0.017962
115	3	0.183608	0.183608	0.297408	0.259338	0.125561	0.060322	0.018828
115	3	0.22446	0.22446	0.324428	0.229792	0.134411	0.058339	0.021628
115	3	0.177025	0.177025	0.277801	0.240016	0.111265	0.098573	0.042293
115	6	0.201315	0.201315	0.312105	0.235638	0.153375	0.070169	0.026266
115	6	0.187243	0.187243	0.290796	0.262814	0.101956	0.068653	0.05391
115	15	0.172397	0.172397	0.340746	0.216876	0.155678	0.049878	0.050886
115	15	0.20559	0.20559	0.313639	0.250827	0.144897	0.070666	0.014382
115	63	0.184118	0.184118	0.287527	0.209692	0.14372	0.077416	0.061272
115	63	0.203383	0.203383	0.303545	0.221913	0.131259	0.071807	0.03769
116	0	0.275365	0.275365	0.310986	0.225077	0.136297	0.032045	0.02023
116	0	0.257601	0.257601	0.280034	0.218498	0.117064	0.053578	0.034602
116	3	0.29325	0.29325	0.300591	0.214568	0.12084	0.055386	0.015365
116	3	0.267547	0.267547	0.31199	0.209342	0.122837	0.063577	0.018304
116	6	0.282615	0.282615	0.303892	0.224899	0.136321	0.030181	0.019805
116	6	0.263801	0.263801	0.335868	0.212621	0.137386	0.037287	0.013037
117	0	0.489686	0.489686	0.341803	0.135483	0.030189	0.002839	0
117	0	0.501186	0.501186	0.344699	0.132114	0.022002	0	0
117	3	0.478976	0.478976	0.352364	0.149128	0.019531	0	0
117	3	0.470784	0.470784	0.340085	0.14488	0.036169	0.008082	0
117	3	0.479857	0.479857	0.318349	0.140894	0.052375	0.008526	0
117	6	0.45949	0.45949	0.347695	0.140112	0.047383	0.00532	0
117	6	0.448824	0.448824	0.356856	0.161589	0.032731	0	0
117	15	0.39342	0.39342	0.299091	0.185696	0.076863	0.035873	0.009056
117	63	0.230053	0.230053	0.285541	0.231356	0.143106	0.078037	0.024285
118	3	0.562994	0.562994	0.299074	0.11404	0.023892	0	0
118	6	0.574872	0.574872	0.303777	0.107733	0.013619	0	0
118	6	0.533039	0.533039	0.342633	0.098552	0.025776	0	0
118	15	0.50924	0.50924	0.335857	0.12563	0.027696	0.001577	0
119	0	0.265392	0.265392	0.300122	0.206806	0.114825	0.056226	0.03106
119	3	0.269238	0.269238	0.306337	0.226389	0.122388	0.05491	0.01644
119	3	0.267722	0.267722	0.299998	0.22361	0.124419	0.053872	0.025409
119	3	0.264246	0.264246	0.29496	0.22912	0.121492	0.060583	0.023781
119	6	0.249917	0.249917	0.305517	0.221162	0.129371	0.061271	0.02492
119	6	0.274657	0.274657	0.277732	0.221139	0.131882	0.059435	0.026647
119	6	0.253041	0.253041	0.296332	0.221568	0.122591	0.065723	0.030545
119	15	0.212166	0.212166	0.265957	0.218639	0.149379	0.085586	0.042484
119	15	0.209218	0.209218	0.258572	0.215053	0.152551	0.087291	0.045542
119	63	0.131699	0.131699	0.192585	0.207833	0.175066	0.130021	0.083877
120	0	0.424022	0.424022	0.378244	0.143186	0.036982	0.017566	0
120	0	0.403054	0.403054	0.329471	0.08727	0.088567	0.022233	0.061076
120	3	0.422348	0.422348	0.353835	0.149993	0.059477	0.014348	0
120	3	0.422402	0.422402	0.348075	0.124725	0.040952	0.047947	0.015897
120	3	0.413825	0.413825	0.297069	0.138921	0.046641	0.061897	0.025936
120	6	0.41271	0.41271	0.365519	0.146971	0.042909	0.027174	0.004717
120	6	0.468089	0.468089	0.378033	0.133695	0.020183	0	0
120	6	0.404778	0.404778	0.316289	0.134141	0.051031	0.052858	0.033205
120	15	0.409253	0.409253	0.347212	0.131025	0.069678	0.030217	0.012615
120	15	0.389942	0.389942	0.33045	0.154916	0.062141	0.023072	0.02606
120	63	0.367096	0.367096	0.303791	0.154361	0.059156	0.05186	0.050029
120	63	0.320847	0.320847	0.341504	0.141174	0.104768	0.02199	0.032542
121	0	0.183475	0.183475	0.260636	0.257107	0.158071	0.061502	0.073715
121	0	0.203956	0.203956	0.302793	0.242483	0.132765	0.039431	0.078455
121	3	0.196968	0.196968	0.275823	0.281865	0.131943	0.040449	0.071734
121	3	0.220598	0.220598	0.287581	0.273367	0.115344	0.033326	0.067861
121	6	0.184179	0.184179	0.295584	0.272963	0.119206	0.058169	0.060242
121	6	0.206258	0.206258	0.303062	0.247204	0.157135	0.041352	0.043116
121	6	0.197304	0.197304	0.262912	0.295545	0.134226	0.045144	0.054948
121	15	0.205794	0.205794	0.289631	0.244995	0.136754	0.068181	0.054683
121	15	0.167524	0.167524	0.277057	0.256883	0.139595	0.055841	0.088299
121	63	0.207349	0.207349	0.331484	0.22602	0.122777	0.032035	0.068868
121	63	0.195282	0.195282	0.276044	0.285188	0.138985	0.065198	0.036676
122	0	0.502988	0.502988	0.375694	0.112923	0.008395	0	0
122	0	0.601652	0.601652	0.346157	0.030781	0.021409	0	0
122	6	0.451641	0.451641	0.412188	0.136171	0	0	0
122	6	0.529925	0.529925	0.361244	0.065353	0.043478	0	0
122	63	0.402547	0.402547	0.365782	0.214317	0.017354	0	0
123	0	0.441483	0.441483	0.345844	0.151952	0.049142	0.011579	0
123	0	0.440319	0.440319	0.345316	0.153071	0.049239	0.012055	0
123	3	0.44314	0.44314	0.344392	0.151396	0.048632	0.012441	0
123	3	0.444376	0.444376	0.340668	0.155462	0.047844	0.01165	0
123	3	0.445462	0.445462	0.343119	0.149991	0.048205	0.013223	0
123	6	0.437251	0.437251	0.346499	0.153475	0.049813	0.012962	0
123	6	0.442009	0.442009	0.339084	0.156951	0.049504	0.012452	0
123	6	0.440061	0.440061	0.345679	0.15094	0.049734	0.013586	0
123	15	0.43019	0.43019	0.346653	0.154787	0.05204	0.016329	0
123	15	0.439383	0.439383	0.338226	0.154761	0.051613	0.016017	0
123	63	0.412531	0.412531	0.331443	0.158464	0.06486	0.02415	0.008552
123	63	0.409723	0.409723	0.329589	0.161789	0.065553	0.023051	0.010296
124	0	0.450141	0.450141	0.352236	0.160161	0.034951	0.002511	0
124	0	0.467537	0.467537	0.345675	0.136908	0.044609	0.005271	0
124	6	0.321866	0.321866	0.307287	0.211048	0.093399	0.050817	0.015583
124	15	0.185017	0.185017	0.269346	0.308993	0.159123	0.064786	0.012735
124	63	0.113505	0.113505	0.244221	0.258492	0.194547	0.120796	0.05128
125	0	0.3841	0.3841	0.361953	0.18559	0.063792	0.004566	0
125	0	0.333052	0.333052	0.360107	0.224323	0.058495	0.024023	0
125	3	0.340459	0.340459	0.316296	0.182027	0.090818	0.0704	0
125	3	0.294733	0.294733	0.309687	0.21793	0.126287	0.043329	0.008034
125	6	0.262089	0.262089	0.363774	0.230544	0.102375	0.035439	0.005779
125	6	0.213766	0.213766	0.334516	0.197687	0.163536	0.07245	0.018044
126	3	0.390198	0.390198	0.386794	0.141413	0.053367	0.0213	0.006929
126	3	0.420457	0.420457	0.347517	0.180097	0.046898	0.005031	0
126	6	0.38492	0.38492	0.345176	0.186845	0.075392	0.007667	0
126	63	0.0992533	0.099253	0.197128	0.275227	0.195971	0.132982	0.047276
126	63	0.130484	0.130484	0.286582	0.244427	0.203068	0.029445	0.037243
127	0	0.35061	0.35061	0.309534	0.18859	0.103762	0.048213	-0.000709
127	3	0.322092	0.322092	0.299758	0.204417	0.11109	0.041472	0.019094
127	3	0.317503	0.317503	0.299075	0.20758	0.108462	0.053	0.01438
127	63	0.0805023	0.080502	0.215277	0.221966	0.206707	0.143174	0.085189
128	0	0.359294	0.359294	0.341336	0.222807	0.052335	0.024228	0
128	0	0.348107	0.348107	0.338906	0.235375	0.077612	0	0
128	3	0.293021	0.293021	0.351312	0.215715	0.128409	0.011543	0
128	3	0.324966	0.324966	0.298909	0.224841	0.1149	0.029327	0.007057
128	3	0.309153	0.309153	0.322754	0.195506	0.118154	0.04401	0.010423
128	6	0.265393	0.265393	0.310914	0.20651	0.135498	0.053894	0.027792
128	6	0.215394	0.215394	0.308223	0.265456	0.130599	0.066612	0.013715
128	15	0.0915394	0.091539	0.184462	0.246793	0.237726	0.133871	0.0691
129	0	0.31138	0.31138	0.325379	0.210699	0.093046	0.039667	0.01971
129	0	0.321978	0.321978	0.317323	0.208343	0.104333	0.035318	0.012705
129	3	0.275937	0.275937	0.33286	0.20575	0.127259	0.043823	0.014372
129	3	0.288118	0.288118	0.311375	0.213786	0.113224	0.048289	0.021488
129	3	0.287626	0.287626	0.314709	0.223674	0.109742	0.04143	0.021131
129	6	0.276453	0.276453	0.289251	0.199612	0.133068	0.062584	0.035465
129	6	0.232393	0.232393	0.2831	0.236405	0.133195	0.072044	0.036685
129	15	0.127298	0.127298	0.222353	0.230416	0.181252	0.117879	0.070702
129	63	0.164169	0.164169	0.256937	0.242266	0.181858	0.098299	0.04621
130	0	0.446963	0.446963	0.358577	0.117001	0.044115	0.033703	-0.000359
130	3	0.385063	0.385063	0.340824	0.18808	0.059552	0.021359	0.005123
130	3	0.376732	0.376732	0.34989	0.181029	0.074117	0.018232	0
130	15	0.143449	0.143449	0.247194	0.258724	0.181573	0.058445	0.033337
131	0	0.159204	0.159204	0.254009	0.259078	0.164501	0.094078	0.051787
131	0	0.163222	0.163222	0.275212	0.262607	0.151327	0.088527	0.045523
131	3	0.126514	0.126514	0.22575	0.202838	0.194656	0.11655	0.078311
131	3	0.141655	0.141655	0.224339	0.248315	0.174236	0.092155	0.059841
131	3	0.154873	0.154873	0.232837	0.227339	0.180666	0.107177	0.059931
131	6	0.113066	0.113066	0.203207	0.202748	0.171319	0.114295	0.086275
132	0	0.529306	0.529306	0.385163	0.078106	0.007424	0	0
132	3	0.437382	0.437382	0.399835	0.134667	0.02812	-3e-06	0
132	3	0.497728	0.497728	0.319708	0.150099	0.03008	0.002385	0
132	3	0.497979	0.497979	0.322855	0.136902	0.036472	0.005793	0
132	6	0.442174	0.442174	0.320717	0.16667	0.063609	0.00683	0
132	6	0.447053	0.447053	0.335558	0.162387	0.050782	0.00422	0
132	6	0.424711	0.424711	0.313104	0.193854	0.063688	0.004644	0
132	15	0.233814	0.233814	0.342963	0.271364	0.115457	0.031873	0.004529
132	15	0.219214	0.219214	0.309468	0.276479	0.164419	0.018352	0.012069
132	63	0.17554	0.17554	0.286227	0.291094	0.182407	0.054859	0.009872
132	63	0.178741	0.178741	0.264395	0.301395	0.158678	0.083818	0.012973
133	0	0.436689	0.436689	0.317396	0.121044	0.050226	0.033791	0.026984
133	0	0.436965	0.436965	0.312194	0.129908	0.042454	0.035428	0.02728
133	3	0.385513	0.385513	0.304626	0.154155	0.06882	0.035436	0.043574
133	3	0.34172	0.34172	0.315177	0.146286	0.075533	0.051778	0.048875
133	3	0.392596	0.392596	0.337357	0.167551	0.062515	0.026256	0.013725
133	6	0.333084	0.333084	0.300509	0.183226	0.084174	0.058992	0.032898
133	6	0.27352	0.27352	0.300769	0.193228	0.087788	0.068543	0.050067
133	6	0.318883	0.318883	0.293511	0.167844	0.100828	0.064464	0.040112
133	15	0.153121	0.153121	0.230445	0.238078	0.14369	0.121906	0.083137
133	63	0.0728707	0.072871	0.212498	0.228179	0.217563	0.138982	0.092449
133	63	0.0740489	0.074049	0.175115	0.263857	0.223784	0.148488	0.07911
134	3	0.477357	0.477357	0.30566	0.143678	0.057233	0.016072	0
134	6	0.470426	0.470426	0.309336	0.150097	0.054669	0.015472	0
134	6	0.333566	0.333566	0.310795	0.206673	0.09434	0.044098	0.010528
134	63	0.229196	0.229196	0.291779	0.176969	0.082977	0.033959	0.095441
135	3	0.304581	0.304581	0.343744	0.202397	0.098824	0.0407	0.009754
135	6	0.314858	0.314858	0.327449	0.215343	0.095169	0.034096	0.013084
135	6	0.314604	0.314604	0.330466	0.210267	0.095833	0.037019	0.011811
135	15	0.296597	0.296597	0.342133	0.220757	0.086919	0.049728	0.003866
136	0	0.296255	0.296255	0.355333	0.193456	0.113016	0.030585	0.011355
136	3	0.308721	0.308721	0.345422	0.211068	0.090834	0.032266	0.011689
136	6	0.300585	0.300585	0.348401	0.201757	0.10166	0.038772	0.008825
136	6	0.304072	0.304072	0.344496	0.199414	0.108593	0.035265	0.00816
136	6	0.312131	0.312131	0.334891	0.208619	0.096766	0.035735	0.011859
136	15	0.278959	0.278959	0.328176	0.196047	0.129801	0.060314	0.006702
136	15	0.300499	0.300499	0.306354	0.219242	0.12863	0.035407	0.009868
137	0	0.483645	0.483645	0.179711	0.214298	0.101176	0.021171	0
137	6	0.413745	0.413745	0.187744	0.306662	0.071676	0.020173	0
137	6	0.419877	0.419877	0.257025	0.206239	0.054446	0.055084	0.007328
137	6	0.520264	0.520264	0.281518	0.109356	0.073414	0.015447	0
137	15	0.491408	0.491408	0.241972	0.198291	0.051305	0.017024	0
137	15	0.530714	0.530714	0.233085	0.16016	0.039806	0.036235	0
138	0	0.275193	0.275193	0.34899	0.21909	0.104385	0.039919	0.012423
138	3	0.229983	0.229983	0.264427	0.233249	0.153843	0.065819	0.026182
138	3	0.247908	0.247908	0.348394	0.222473	0.106688	0.04623	0.023061
138	6	0.249156	0.249156	0.306315	0.223611	0.172825	0.036252	0.01184
138	6	0.272486	0.272486	0.334092	0.228353	0.124662	0.029525	0.010882
138	6	0.268428	0.268428	0.310839	0.253798	0.11712	0.037644	0.012173
138	15	0.254803	0.254803	0.335523	0.250113	0.112419	0.034307	0.012836
138	15	0.258047	0.258047	0.315364	0.250341	0.12563	0.038488	0.01213
138	63	0.23505	0.23505	0.31585	0.252324	0.095444	0.040168	0.052695
138	63	0.222716	0.222716	0.32971	0.236203	0.085796	0.058564	0.041311
139	0	0.229059	0.229059	0.338779	0.254227	0.115127	0.048513	0.014295
139	0	0.235733	0.235733	0.33736	0.233751	0.134375	0.057459	0.001323
139	3	0.228602	0.228602	0.328183	0.258809	0.125917	0.050342	0.008148
139	6	0.225292	0.225292	0.336003	0.235775	0.11713	0.058141	0.020266
139	6	0.208218	0.208218	0.363565	0.242535	0.126702	0.048361	0.01062
139	6	0.236075	0.236075	0.326542	0.243805	0.141648	0.046498	0.005431
139	15	0.202967	0.202967	0.346214	0.263084	0.133801	0.041191	0.012742
139	15	0.228844	0.228844	0.317774	0.24545	0.135275	0.05767	0.014987
139	63	0.170147	0.170147	0.383882	0.308207	0.108132	0.022142	0.007489
139	63	0.242115	0.242115	0.327942	0.294332	0.111117	0.024495	0
140	0	0.457596	0.457596	0.359152	0.139923	0.04333	0	0
140	0	0.463252	0.463252	0.310314	0.194519	0.031915	0	0
140	3	0.419988	0.419988	0.387688	0.074197	0.080905	0.037222	0
140	3	0.341431	0.341431	0.421254	0.147477	0.089838	0	0
140	3	0.421824	0.421824	0.394287	0.136193	0.022804	0.024891	0
140	6	0.342133	0.342133	0.331586	0.200187	0.126094	0	0
140	6	0.361375	0.361375	0.337901	0.188552	0.097684	0.014488	0
140	6	0.413419	0.413419	0.424295	0.098031	0.052532	0.011722	0
140	15	1	1	0	0	0	0	0
140	15	0.165867	0.165867	0.287628	0.293736	0.143744	0.109025	0
140	63	0.0909112	0.090911	0.299739	0.297866	0.184393	0.091076	0.036015
141	0	0.36686	0.36686	0.338213	0.193853	0.055075	0.045071	0.000927
141	3	0.312089	0.312089	0.34078	0.198919	0.074912	0.069345	0.003954
141	3	0.328872	0.328872	0.330086	0.197422	0.086043	0.052012	0.005565
141	3	0.315592	0.315592	0.34458	0.187946	0.088077	0.060524	0.003282
141	6	0.301578	0.301578	0.310306	0.205639	0.09437	0.073844	0.014263
141	6	0.304612	0.304612	0.29509	0.191623	0.101214	0.079045	0.017285
141	6	0.327481	0.327481	0.309339	0.207505	0.079879	0.073382	0.002414
141	15	0.171859	0.171859	0.214683	0.214185	0.136267	0.212465	0.037552
142	0	0.273387	0.273387	0.399858	0.206062	0.111523	0.009169	0
142	3	0.254202	0.254202	0.452077	0.20535	0.072084	0.016286	0
142	3	0.294186	0.294186	0.272817	0.26757	0.093591	0.044246	0.02736
142	6	0.247613	0.247613	0.392369	0.21984	0.096451	0.043727	0
142	6	0.245658	0.245658	0.364783	0.251645	0.103022	0.027219	0.007673
143	0	0.352845	0.352845	0.33699	0.196619	0.076712	0.034693	0.002141
143	0	0.337822	0.337822	0.333199	0.198382	0.093632	0.030313	0.006652
143	3	0.271923	0.271923	0.309752	0.22824	0.11148	0.054276	0.022704
143	3	0.283099	0.283099	0.294798	0.249501	0.112729	0.049532	0.010341
143	3	0.290382	0.290382	0.314249	0.211712	0.111692	0.058499	0.013466
143	6	0.254541	0.254541	0.288979	0.208924	0.12454	0.069438	0.040212
143	6	0.238575	0.238575	0.288528	0.198084	0.15018	0.078022	0.033975
143	6	0.268926	0.268926	0.308533	0.202767	0.124149	0.068747	0.020189
144	3	0.420492	0.420492	0.364274	0.156772	0.046697	0.011765	0
144	3	0.41114	0.41114	0.34164	0.17543	0.063235	0.008555	0
144	6	0.416335	0.416335	0.348678	0.16235	0.064025	0.008612	0
144	6	0.413749	0.413749	0.332392	0.159643	0.067301	0.02418	0.002735
144	6	0.393621	0.393621	0.328344	0.172526	0.07897	0.021235	0.005304
144	63	0.296446	0.296446	0.295737	0.195856	0.117799	0.064295	0.019664
144	63	0.282011	0.282011	0.284585	0.208251	0.128917	0.060859	0.02517
145	3	0.369859	0.369859	0.304838	0.206907	0.104837	0.01356	0
145	3	0.322022	0.322022	0.322755	0.226557	0.085154	0.042602	0.000911
145	3	0.358731	0.358731	0.312091	0.20033	0.124165	0.004684	0
145	6	0.411761	0.411761	0.267543	0.177865	0.126531	0.016299	0
145	15	0.120036	0.120036	0.260113	0.247349	0.187099	0.123632	0.051523
146	3	0.539589	0.539589	0.31762	0.122135	0.020657	0	0
146	3	0.631633	0.631633	0.372439	-0.004072	0	0	0
146	6	0.349106	0.349106	0.330912	0.114667	0.071449	0.021183	0.076414
146	6	0.606677	0.606677	0.333172	0.054877	0.005274	0	0
146	15	0.269946	0.269946	0.359764	0.219239	0.084579	0.026086	0.031196
146	63	0.332426	0.332426	0.307366	0.223292	0.074546	0.029	0.031877
147	3	0.518343	0.518343	0.377702	0.104365	-0.00041	0	0
147	3	0.536062	0.536062	0.343563	0.112367	0.008008	0	0
147	6	0.514621	0.514621	0.309039	0.176058	0.000283	0	0
147	6	0.513852	0.513852	0.360708	0.10367	0.02177	0	0
147	6	0.493949	0.493949	0.35066	0.146296	0.009095	0	0
147	63	0.394786	0.394786	0.319357	0.246601	0.026655	0.0126	0
148	3	0.412424	0.412424	0.334547	0.187632	0.056605	0.008792	0
148	3	0.39217	0.39217	0.379121	0.176197	0.039094	0.013419	0
148	3	0.429866	0.429866	0.355337	0.163076	0.04596	0.005761	0
148	6	0.37317	0.37317	0.319078	0.211498	0.083735	0.012518	0
148	6	0.345761	0.345761	0.310601	0.212889	0.113729	0.01702	0
148	6	0.366507	0.366507	0.347103	0.191883	0.069516	0.021654	0.003338
148	15	0.227207	0.227207	0.309976	0.251612	0.144779	0.049152	0.017216
148	15	0.209896	0.209896	0.289474	0.275935	0.149662	0.052166	0.01769
148	63	0.182884	0.182884	0.319196	0.269872	0.141162	0.076231	0.010656
148	63	0.209796	0.209796	0.31631	0.249623	0.161135	0.056648	0.006487
149	0	0.399031	0.399031	0.357897	0.167724	0.068006	0.007342	0
149	3	0.249752	0.249752	0.315753	0.226899	0.125188	0.043614	0.038793
149	3	0.270861	0.270861	0.278509	0.226711	0.156188	0.061555	0.006175
149	3	0.309775	0.309775	0.321846	0.200289	0.108516	0.047817	0.011755
149	6	0.157373	0.157373	0.20053	0.1975	0.128321	0.082495	0.023851
149	6	0.251191	0.251191	0.255198	0.22944	0.147387	0.080015	0.028537
150	3	0.456811	0.456811	0.391705	0.14398	0.007504	0	0
150	3	0.516528	0.516528	0.353284	0.122459	0.007728	0	0
150	3	0.519276	0.519276	0.331361	0.114535	0.034828	0	0
150	6	0.478772	0.478772	0.347216	0.136714	0.03287	0.004428	0
150	6	0.429303	0.429303	0.364251	0.167285	0.039161	0	0
150	6	0.509107	0.509107	0.305489	0.156614	0.02879	0	0
150	15	0.322734	0.322734	0.35972	0.21463	0.083953	0.018023	0.00094
150	15	0.304357	0.304357	0.363887	0.228953	0.07799	0.024812	0
151	0	0.28927	0.28927	0.346799	0.233304	0.092316	0.037716	0.000596
151	3	0.253085	0.253085	0.320808	0.240862	0.107102	0.056814	0.021329
151	3	0.263882	0.263882	0.305878	0.247909	0.114728	0.057777	0.009826
151	3	0.267633	0.267633	0.338222	0.238858	0.094711	0.051393	0.009183
151	6	0.2029	0.2029	0.311731	0.234496	0.121436	0.064287	0.032631
151	6	0.256835	0.256835	0.307377	0.239004	0.101301	0.055758	0.0342
152	0	0.462932	0.462932	0.295479	0.167487	0.05639	0.017711	0
152	3	0.38944	0.38944	0.314737	0.203538	0.062062	0.030434	-0.00021
152	3	0.417955	0.417955	0.302896	0.162042	0.073749	0.025145	0.018213
152	6	0.429705	0.429705	0.271493	0.232951	0.044619	0.021232	0
152	6	0.384153	0.384153	0.332005	0.165441	0.07544	0.037822	0.005138
152	15	0.213164	0.213164	0.238107	0.240336	0.152376	0.056718	0.014891
152	15	0.266762	0.266762	0.278029	0.206088	0.166528	0.071954	0.010639
153	0	0.419292	0.419292	0.394751	0.11608	0.069876	0	0
153	3	0.379373	0.379373	0.349206	0.210534	0.060887	0	0
153	3	0.408095	0.408095	0.323182	0.225049	0.043674	0	0
153	6	0.288336	0.288336	0.290724	0.292458	0.120938	0.007545	0
154	0	0.374677	0.374677	0.303926	0.149379	0.077016	0.030072	0.059496
154	3	0.342475	0.342475	0.459875	0.107227	0.069122	0.021301	0
154	3	0.356612	0.356612	0.364203	0.20616	0.056629	0.016396	0
154	15	0.197448	0.197448	0.273945	0.174557	0.150493	0.046517	0.043565
155	0	0.323386	0.323386	0.349141	0.196597	0.094332	0.034239	0.002306
155	0	0.284906	0.284906	0.32914	0.227816	0.11655	0.039688	0.001899
155	3	0.240598	0.240598	0.299549	0.245431	0.118611	0.070893	0.019504
155	3	0.287279	0.287279	0.280296	0.221199	0.151337	0.049146	0.010743
155	3	0.258766	0.258766	0.300267	0.264986	0.119922	0.047545	0.008515
155	6	0.242479	0.242479	0.296401	0.190649	0.148307	0.083261	0.026024
155	6	0.215658	0.215658	0.292303	0.235438	0.124727	0.076632	0.036053
156	0	0.516865	0.516865	0.34174	0.106405	0.034995	-5e-06	0
156	3	0.488913	0.488913	0.363681	0.134714	0.012692	0	0
156	6	0.436172	0.436172	0.383568	0.122483	0.055343	0.002434	0
156	15	0.35013	0.35013	0.348293	0.200454	0.081221	0.019901	0
156	15	0.268978	0.268978	0.316884	0.266584	0.124715	0.019707	0.003131
157	3	0.56571	0.56571	0.359788	0.059576	0.014926	0	0
157	3	0.538973	0.538973	0.336672	0.104437	0.019918	0	0
157	3	0.518497	0.518497	0.325403	0.13792	0.018179	0	0
157	6	0.519535	0.519535	0.337702	0.130581	0.012182	0	0
157	6	0.502198	0.502198	0.364087	0.114448	0.019267	0	0
157	6	0.548177	0.548177	0.286586	0.140534	0.024702	0	0
157	15	0.337105	0.337105	0.373104	0.157023	0.122039	0.010729	0
157	15	0.304716	0.304716	0.316105	0.237209	0.119913	0.017714	0.004343
158	0	0.444004	0.444004	0.331534	0.163287	0.061176	0	0
158	0	0.429321	0.429321	0.362422	0.146313	0.054389	0.007554	0
158	3	0.365027	0.365027	0.349155	0.190689	0.077536	0.017594	0
158	3	0.383304	0.383304	0.35125	0.17504	0.073577	0.01683	0
158	3	0.386232	0.386232	0.346347	0.176435	0.065181	0.022203	0.003601
158	6	0.345532	0.345532	0.298539	0.204074	0.095132	0.042607	0.014116
158	6	0.348877	0.348877	0.328613	0.204205	0.084932	0.024264	0.009109
158	15	0.170046	0.170046	0.254061	0.231443	0.157136	0.118742	0.043561
159	3	0.286815	0.286815	0.436833	0.211555	0.056198	0.008599	0
159	3	0.420948	0.420948	0.384451	0.156212	0.034965	0.003425	0
159	3	0.37425	0.37425	0.399298	0.181231	0.037981	0.007239	0
159	6	0.271154	0.271154	0.437497	0.211776	0.072688	0.006885	0
159	15	0.38725	0.38725	0.389668	0.173221	0.049861	0	0
159	15	0.257684	0.257684	0.421622	0.219817	0.091164	0.009713	0
159	63	0.144528	0.144528	0.446643	0.283888	0.107902	0.017038	0
159	63	0.142101	0.142101	0.482264	0.261636	0.100529	0.01347	0
160	0	0.42746	0.42746	0.328994	0.156821	0.061924	0.0248	0
160	3	0.455103	0.455103	0.320974	0.156825	0.053514	0.013585	0
160	3	0.491108	0.491108	0.270393	0.160173	0.049674	0.028652	0
160	3	0.436507	0.436507	0.338121	0.167476	0.047287	0.010609	0
160	6	0.474785	0.474785	0.355192	0.147423	0.0226	0	0
160	6	0.48937	0.48937	0.293921	0.174816	0.029382	0.012512	0
160	6	0.471904	0.471904	0.337276	0.172618	0.018201	0	0
160	15	0.385433	0.385433	0.322275	0.187107	0.063771	0.033267	0.008147
160	15	0.326757	0.326757	0.309353	0.206578	0.105906	0.039104	0.012302
160	63	0.37083	0.37083	0.262708	0.223788	0.096003	0.033837	0.012834
161	0	0.296812	0.296812	0.35727	0.214997	0.111559	0.018428	0.000934
161	0	0.32947	0.32947	0.366131	0.192688	0.1027	0.009011	0
161	3	0.321441	0.321441	0.354056	0.220218	0.075247	0.02599	0.003048
161	3	0.337867	0.337867	0.380455	0.189447	0.083354	0.008878	0
161	3	0.312936	0.312936	0.324592	0.24051	0.085705	0.016931	0.019325
161	6	0.30909	0.30909	0.374146	0.224073	0.087912	0.004779	0
161	6	0.259798	0.259798	0.373528	0.247859	0.091592	0.02657	0.000653
161	6	0.299639	0.299639	0.330046	0.22119	0.106642	0.027359	0.015125
161	15	0.282213	0.282213	0.350378	0.194318	0.106604	0.057872	0.008616
161	15	0.314994	0.314994	0.294393	0.221152	0.113209	0.040507	0.015746
161	63	0.264594	0.264594	0.268802	0.232879	0.103491	0.054033	0.047519
161	63	0.24168	0.24168	0.314642	0.205315	0.130549	0.066022	0.031918
162	3	0.482365	0.482365	0.302433	0.167588	0.045724	0.00189	0
162	3	0.373671	0.373671	0.35321	0.178449	0.08031	0.01436	0
162	6	0.443459	0.443459	0.295718	0.191858	0.055828	0.013138	0
162	6	0.380338	0.380338	0.294097	0.159079	0.026663	0.020435	0.039528
162	15	0.334937	0.334937	0.31896	0.233261	0.061806	0.044575	0.006461
162	63	0.39853	0.39853	0.351042	0.184905	0.064724	0.000799	0
162	63	0.391659	0.391659	0.318808	0.183357	0.087997	0.018179	0
163	3	0.217378	0.217378	0.164162	0.220081	0.172164	0.093804	0.072874
163	6	0.339787	0.339787	0.281104	0.379109	0	0	0
163	6	0.457525	0.457525	0.339027	0.1544	0.044958	0.004089	0
163	15	0.0410165	0.041017	0.043268	0.435791	0.290615	0.137579	0.043844
163	15	0.244583	0.244583	0.159091	0.192658	0.152104	0.076196	0.086172
163	63	0.325192	0.325192	0.193299	0.466852	0.014658	0	0
164	3	0.424975	0.424975	0.333522	0.178871	0.055324	0.007308	0
164	3	0.416879	0.416879	0.348494	0.163828	0.057578	0.013221	0
164	6	0.395658	0.395658	0.350092	0.188686	0.055196	0.010368	0
164	6	0.425912	0.425912	0.326544	0.171518	0.063168	0.012858	0
164	6	0.399538	0.399538	0.331728	0.184062	0.069293	0.015379	0
164	15	0.318571	0.318571	0.274594	0.146587	0.06502	0.01736	0.077407
164	15	0.350557	0.350557	0.303685	0.199857	0.063027	0.031892	0.019769
165	0	0.549132	0.549132	0.310429	0.11392	0.02652	0	0
165	3	0.546239	0.546239	0.298893	0.119782	0.031854	0.003233	0
165	3	0.533725	0.533725	0.315264	0.134418	0.016594	0	0
165	6	0.539044	0.539044	0.29717	0.1519	0.011886	0	0
165	15	0.492643	0.492643	0.334257	0.131365	0.03516	0.006576	0
165	15	0.493603	0.493603	0.299948	0.15396	0.044678	0.00781	0
165	63	0.479594	0.479594	0.308427	0.145054	0.061791	0.005134	0
165	63	0.454483	0.454483	0.321087	0.162328	0.041908	0.020194	0
166	3	0.607061	0.607061	0.280387	0.096749	0.015802	0	0
166	3	0.584597	0.584597	0.38673	0.028672	0	0	0
166	6	0.224322	0.224322	0.216941	0.444268	0.121894	-0.007426	0
166	6	0.498485	0.498485	0.405248	0.086027	0.010239	0	0
166	15	0.432815	0.432815	0.424508	0.101991	0.040687	0	0
166	15	0.400475	0.400475	0.385712	0.125769	0.088043	0	0
166	63	0.314736	0.314736	0.308983	0.287785	0.077735	0.01076	0
166	63	0.293696	0.293696	0.323216	0.239334	0.103172	0.035059	0.005523
167	0	0.313806	0.313806	0.256028	0.095223	0.16185	0.110763	0.051181
167	6	0.322737	0.322737	0.247749	0.127037	0.150122	0.102361	0.040042
167	15	0.247732	0.247732	0.221911	0.09677	0.19586	0.146235	0.071255
167	63	0.252508	0.252508	0.214023	0.115182	0.181506	0.13773	0.071633
168	0	0.451247	0.451247	0.342636	0.142725	0.045421	0.017971	0
168	0	0.442638	0.442638	0.345878	0.144674	0.040937	0.023057	0.002817
168	3	0.439806	0.439806	0.338675	0.149171	0.048875	0.022125	0.001348
168	3	0.445265	0.445265	0.336417	0.14016	0.048018	0.028223	0.001917
168	3	0.443696	0.443696	0.338687	0.147623	0.043846	0.024755	0.001393
168	6	0.428408	0.428408	0.339647	0.152685	0.048356	0.028167	0.002737
168	6	0.431953	0.431953	0.33574	0.142334	0.048919	0.037972	0.003082
168	6	0.427934	0.427934	0.339575	0.147808	0.044927	0.037475	0.00228
168	15	0.405768	0.405768	0.328667	0.159538	0.053428	0.046862	0.005736
168	15	0.411942	0.411942	0.322478	0.141272	0.055138	0.064328	0.004843
168	63	0.376122	0.376122	0.3115	0.171432	0.075457	0.047963	0.017526
169	0	0.209439	0.209439	0.311559	0.246146	0.140256	0.062526	0.022513
169	3	0.207633	0.207633	0.310152	0.246875	0.140957	0.062883	0.023776
169	6	0.207578	0.207578	0.30968	0.246505	0.141844	0.063188	0.023141
169	63	0.193585	0.193585	0.289879	0.236964	0.140557	0.071825	0.035761
170	0	0.416651	0.416651	0.355392	0.160434	0.05315	0.014373	0
170	0	0.407269	0.407269	0.360597	0.164901	0.05372	0.013514	0
170	3	0.413045	0.413045	0.346441	0.167067	0.057517	0.01593	0
170	3	0.416564	0.416564	0.339615	0.173695	0.055456	0.01467	0
170	3	0.414031	0.414031	0.348867	0.168663	0.052935	0.015504	0
170	6	0.413263	0.413263	0.345255	0.166302	0.059206	0.015974	0
170	6	0.413614	0.413614	0.351432	0.165507	0.055641	0.013805	0
170	6	0.410351	0.410351	0.350571	0.1649	0.056927	0.017251	0
170	15	0.40599	0.40599	0.349914	0.167886	0.058538	0.017671	0
170	15	0.404015	0.404015	0.347251	0.165152	0.058398	0.020272	0.004912
170	63	0.39322	0.39322	0.338768	0.171174	0.065057	0.023826	0.007954
170	63	0.380426	0.380426	0.331978	0.174416	0.072208	0.028478	0.012494
171	0	0.419331	0.419331	0.34902	0.162971	0.053725	0.014952	0
171	0	0.419732	0.419732	0.347569	0.162325	0.055485	0.014889	0
171	3	0.416607	0.416607	0.349478	0.162365	0.055853	0.015697	0
171	3	0.418398	0.418398	0.348809	0.161942	0.055457	0.015394	0
171	3	0.266142	0.266142	0.334509	0.271251	0.113461	0.014636	0
171	6	0.0429162	0.042916	0.422348	0.34476	0.150661	0.037782	0.001534
171	6	0.416148	0.416148	0.348878	0.163158	0.056746	0.01507	0
171	6	0.419406	0.419406	0.346344	0.163575	0.055467	0.015208	0
171	15	0.407322	0.407322	0.349416	0.164415	0.060573	0.018274	0
171	15	0.409365	0.409365	0.348559	0.164926	0.058051	0.019099	0
171	63	0.393184	0.393184	0.337413	0.166662	0.067014	0.026042	0.009684
171	63	0.386888	0.386888	0.329891	0.170098	0.071339	0.029464	0.01232
172	0	0.515923	0.515923	0.327618	0.119336	0.030518	0.006605	0
172	0	0.517838	0.517838	0.326586	0.117582	0.031583	0.006411	0
172	3	0.5128	0.5128	0.328541	0.120112	0.031847	0.0067	0
172	3	0.513152	0.513152	0.327292	0.121135	0.03188	0.006542	0
172	3	0.515864	0.515864	0.325961	0.120534	0.031232	0.006409	0
172	6	0.512844	0.512844	0.327882	0.12035	0.032141	0.006783	0
172	6	0.510722	0.510722	0.3273	0.122259	0.032747	0.006972	0
172	6	0.51202	0.51202	0.327344	0.121304	0.032232	0.0071	0
172	15	0.500931	0.500931	0.328585	0.125656	0.035796	0.009031	0
172	15	0.506035	0.506035	0.326879	0.123662	0.034928	0.008496	0
172	63	0.48338	0.48338	0.324949	0.134405	0.043867	0.013399	0
172	63	0.475708	0.475708	0.325089	0.137278	0.047294	0.014632	0
173	3	0.226958	0.226958	0.317085	0.245847	0.131578	0.053146	0.019303
173	15	0.218222	0.218222	0.298191	0.240232	0.129583	0.074516	0.029558
173	63	0.170186	0.170186	0.219703	0.189035	0.114827	0.101986	0.076241
173	63	0.212109	0.212109	0.302049	0.228714	0.125104	0.064489	0.034623
174	0	0.37038	0.37038	0.343353	0.189953	0.078963	0.017351	0
174	0	0.352598	0.352598	0.343649	0.192421	0.082591	0.025506	0.003236
174	3	0.390644	0.390644	0.324126	0.190093	0.087211	0.007926	0
174	3	0.357137	0.357137	0.337791	0.1909	0.080739	0.027579	0.005853
174	3	0.359069	0.359069	0.333248	0.19796	0.08088	0.025497	0.003347
174	6	0.384044	0.384044	0.351341	0.194184	0.057831	0.012599	0
174	6	0.349541	0.349541	0.338809	0.193496	0.085875	0.027888	0.004391
174	6	0.353912	0.353912	0.334027	0.194853	0.081018	0.030523	0.005666
174	15	0.335972	0.335972	0.338431	0.191884	0.09002	0.034895	0.008798
174	15	0.3445	0.3445	0.319855	0.199888	0.094397	0.033287	0.008072
174	63	0.32348	0.32348	0.31795	0.204195	0.094722	0.04374	0.015913
174	63	0.318201	0.318201	0.317282	0.189352	0.103512	0.041975	0.023668
175	0	0.456733	0.456733	0.340251	0.146352	0.045298	0.011367	0
175	0	0.458371	0.458371	0.337257	0.147234	0.045475	0.011663	0
175	3	0.453595	0.453595	0.33881	0.147824	0.047268	0.012503	0
175	3	0.45697	0.45697	0.337891	0.146211	0.046836	0.012092	0
175	3	0.46154	0.46154	0.337756	0.143059	0.045777	0.011869	0
175	6	0.453917	0.453917	0.34073	0.145439	0.047459	0.012454	0
175	6	0.456414	0.456414	0.33629	0.147078	0.047773	0.012446	0
175	6	0.454839	0.454839	0.337389	0.147108	0.047755	0.012908	0
175	15	0.442962	0.442962	0.332774	0.154386	0.053306	0.016571	0
175	15	0.444546	0.444546	0.334686	0.150937	0.053258	0.016573	0
175	63	0.415667	0.415667	0.323326	0.159687	0.065718	0.025327	0.010275
175	63	0.406533	0.406533	0.321964	0.161908	0.069546	0.028722	0.011328
176	0	0.456733	0.456733	0.340251	0.146352	0.045298	0.011367	0
176	0	0.458371	0.458371	0.337257	0.147234	0.045475	0.011663	0
176	3	0.453595	0.453595	0.33881	0.147824	0.047268	0.012503	0
176	3	0.45697	0.45697	0.337891	0.146211	0.046836	0.012092	0
176	3	0.46154	0.46154	0.337756	0.143059	0.045777	0.011869	0
176	6	0.453917	0.453917	0.34073	0.145439	0.047459	0.012454	0
176	6	0.456414	0.456414	0.33629	0.147078	0.047773	0.012446	0
176	6	0.454839	0.454839	0.337389	0.147108	0.047755	0.012908	0
176	15	0.442962	0.442962	0.332774	0.154386	0.053306	0.016571	0
176	15	0.444546	0.444546	0.334686	0.150937	0.053258	0.016573	0
176	63	0.415667	0.415667	0.323326	0.159687	0.065718	0.025327	0.010275
176	63	0.406533	0.406533	0.321964	0.161908	0.069546	0.028722	0.011328
177	0	0.355784	0.355784	0.349678	0.186212	0.080253	0.026089	0.001983
177	3	0.361738	0.361738	0.325302	0.195317	0.083866	0.027807	0.005971
177	6	0.362493	0.362493	0.333755	0.189123	0.085529	0.026435	0.002666
177	15	0.341572	0.341572	0.327302	0.194748	0.086547	0.040018	0.009812
177	63	0.33169	0.33169	0.335167	0.195146	0.084449	0.038019	0.01553
177	63	0.326924	0.326924	0.332432	0.20416	0.088735	0.031557	0.016193
178	0	0.21013	0.21013	0.310197	0.239232	0.150507	0.061504	0.022457
178	0	0.0468373	0.046837	0.232049	0.308509	0.244181	0.104391	0.051353
178	3	0.210518	0.210518	0.310566	0.24435	0.133327	0.070216	0.025009
178	3	0.21115	0.21115	0.302216	0.255227	0.137672	0.057473	0.028491
178	3	0.210247	0.210247	0.308297	0.242988	0.141308	0.065214	0.025225
178	6	0.202499	0.202499	0.2999	0.252899	0.141162	0.068546	0.024947
178	6	0.206686	0.206686	0.30944	0.246051	0.141007	0.065347	0.023417
178	6	0.212215	0.212215	0.301999	0.251612	0.137099	0.063674	0.024243
178	15	0.204963	0.204963	0.299565	0.240652	0.145532	0.065965	0.031017
178	15	0.199873	0.199873	0.296307	0.249126	0.141104	0.069614	0.030971
178	63	0.192589	0.192589	0.2822	0.241618	0.143715	0.072127	0.037707
178	63	0.179601	0.179601	0.283154	0.239951	0.139672	0.070163	0.041147
179	0	0.374008	0.374008	0.324834	0.16113	0.066416	0.061237	0.012376
179	0	0.348203	0.348203	0.335596	0.169519	0.071912	0.064724	0.010045
179	3	0.365988	0.365988	0.307517	0.153717	0.068915	0.100495	0.003368
179	3	0.357257	0.357257	0.312362	0.176376	0.07286	0.072854	0.008291
179	3	0.352104	0.352104	0.311824	0.172325	0.066052	0.084205	0.01349
179	6	0.362869	0.362869	0.310438	0.170278	0.071105	0.077672	0.007638
179	6	0.359525	0.359525	0.30361	0.164058	0.072632	0.088316	0.011859
179	6	0.357224	0.357224	0.309731	0.171836	0.075954	0.076134	0.00912
179	15	0.34404	0.34404	0.311085	0.167951	0.075023	0.092807	0.009093
179	15	0.328493	0.328493	0.3024	0.160673	0.074109	0.060899	0.017611
179	63	0.304578	0.304578	0.269216	0.160582	0.077613	0.104785	0.015696
180	0	0.3779	0.3779	0.297591	0.18885	0.022118	0.113541	0
180	3	0.413555	0.413555	0.37001	0.173676	0.041991	0.000769	0
180	6	0.362265	0.362265	0.332634	0.273495	0.032877	-0.001271	0
180	6	0.416598	0.416598	0.297172	0.198112	0.045247	0.027481	0.01539
180	15	0.386044	0.386044	0.309363	0.163291	0.034884	0.091042	0.015375
180	15	0.347455	0.347455	0.30232	0.262441	0.033635	0.054149	0
180	63	0.21369	0.21369	0.300197	0.249674	0.122845	0.100631	0.012964
181	3	0.434969	0.434969	0.33804	0.161175	0.051322	0.014494	0
181	3	0.43127	0.43127	0.342676	0.160717	0.051842	0.013495	0
181	3	0.431051	0.431051	0.348409	0.157234	0.050599	0.012708	0
181	6	0.431617	0.431617	0.344528	0.159216	0.049335	0.015305	0
181	6	0.433691	0.433691	0.344553	0.157295	0.050656	0.013805	0
181	6	0.428558	0.428558	0.349801	0.156358	0.050758	0.014524	0
181	15	0.421805	0.421805	0.344381	0.161466	0.055035	0.017312	0
181	15	0.421718	0.421718	0.343168	0.163728	0.054679	0.016707	0
181	63	0.408784	0.408784	0.332809	0.157926	0.063871	0.024599	0.012012
181	63	0.397295	0.397295	0.327277	0.165012	0.068732	0.028654	0.01303
182	0	0.352749	0.352749	0.351781	0.192868	0.072417	0.024425	0.005761
182	0	0.34361	0.34361	0.355633	0.191506	0.080244	0.024483	0.004523
182	3	0.349007	0.349007	0.348906	0.19828	0.072842	0.025313	0.005652
182	3	0.346059	0.346059	0.349494	0.197269	0.077809	0.024198	0.00517
182	3	0.344654	0.344654	0.352197	0.192055	0.080438	0.026146	0.00451
182	6	0.345223	0.345223	0.34771	0.198647	0.075396	0.026033	0.006992
182	6	0.341588	0.341588	0.354392	0.193299	0.080879	0.024609	0.005234
182	6	0.337208	0.337208	0.357305	0.196709	0.076717	0.026528	0.005532
182	15	0.334998	0.334998	0.340693	0.198928	0.085629	0.028555	0.011198
182	15	0.338421	0.338421	0.344272	0.192669	0.086589	0.027633	0.010415
182	63	0.321402	0.321402	0.333715	0.198626	0.091263	0.039357	0.015637
182	63	0.312493	0.312493	0.327889	0.196205	0.091888	0.042612	0.019975
183	0	0.549762	0.549762	0.318394	0.106229	0.025614	0	0
183	0	0.545607	0.545607	0.322193	0.106014	0.026186	0	0
183	3	0.548562	0.548562	0.318067	0.107523	0.025848	0	0
183	3	0.544245	0.544245	0.322866	0.106684	0.026206	0	0
183	3	0.546098	0.546098	0.319501	0.108927	0.025474	0	0
183	6	0.547328	0.547328	0.318308	0.107076	0.027288	0	0
183	6	0.541073	0.541073	0.323365	0.108587	0.026976	0	0
183	6	0.543107	0.543107	0.320198	0.109638	0.027057	0	0
183	15	0.531126	0.531126	0.31955	0.11239	0.030217	0.006716	0
183	15	0.538058	0.538058	0.31493	0.110173	0.030014	0.006825	0
183	63	0.514822	0.514822	0.316333	0.12079	0.036938	0.011117	0
183	63	0.504973	0.504973	0.316982	0.125452	0.039866	0.012727	0
184	0	0.407011	0.407011	0.339968	0.163766	0.059747	0.021906	0.007601
184	0	0.31403	0.31403	0.263821	0.124683	0.122749	0.101191	0.05008
184	3	0.397044	0.397044	0.333591	0.161053	0.064503	0.030745	0.013065
184	3	0.191734	0.191734	0.161541	0.07734	0.228629	0.196784	0.097306
184	3	0.186891	0.186891	0.157807	0.074645	0.23529	0.201109	0.097948
184	6	0.406656	0.406656	0.346164	0.168662	0.060921	0.017596	0
184	6	0.19938	0.19938	0.169456	0.08183	0.219359	0.188836	0.094904
184	6	0.299669	0.299669	0.258492	0.123739	0.125898	0.109639	0.055264
184	15	0.344295	0.344295	0.294091	0.148101	0.096757	0.067649	0.034799
184	63	0.175982	0.175982	0.155345	0.085666	0.228715	0.185029	0.095511
184	63	0.292318	0.292318	0.26313	0.144177	0.122672	0.092256	0.049837
185	0	0.437388	0.437388	0.328348	0.161676	0.056041	0.016546	0
185	0	0.434916	0.434916	0.331484	0.159661	0.056941	0.016998	0
185	3	0.423748	0.423748	0.343124	0.164085	0.054137	0.014906	0
185	3	0.427663	0.427663	0.339362	0.161207	0.055996	0.015773	0
185	3	0.435023	0.435023	0.335394	0.156425	0.056794	0.016364	0
185	6	0.430102	0.430102	0.341831	0.152228	0.059688	0.016151	0
185	6	0.428698	0.428698	0.333786	0.162142	0.05813	0.017244	0
185	6	0.415393	0.415393	0.344642	0.162396	0.058153	0.019416	0
185	15	0.421392	0.421392	0.333251	0.165586	0.062015	0.017756	0
185	15	0.413305	0.413305	0.335274	0.168172	0.063596	0.019654	0
185	63	0.387318	0.387318	0.336803	0.174825	0.070778	0.023524	0.006752
185	63	0.380748	0.380748	0.332293	0.176248	0.077024	0.025441	0.008245
186	0	0.498876	0.498876	0.324622	0.132489	0.036123	0.00789	0
186	0	0.490144	0.490144	0.33234	0.130288	0.04005	0.007177	0
186	3	0.484715	0.484715	0.334274	0.133833	0.038624	0.008553	0
186	3	0.480954	0.480954	0.337989	0.133599	0.041814	0.005644	0
186	3	0.49951	0.49951	0.322961	0.136006	0.041455	6.8e-05	0
186	6	0.477971	0.477971	0.339492	0.134643	0.039312	0.008582	0
186	6	0.493003	0.493003	0.319552	0.13435	0.044348	0.008747	0
186	6	0.494627	0.494627	0.332085	0.123106	0.041707	0.008476	0
186	15	0.472728	0.472728	0.331578	0.137306	0.046522	0.011866	0
186	15	0.485817	0.485817	0.317089	0.141596	0.043444	0.012053	0
186	63	0.453379	0.453379	0.327411	0.143882	0.056009	0.019319	0
186	63	0.443621	0.443621	0.30605	0.142748	0.062793	0.023202	0.021586
187	0	0.414303	0.414303	0.345064	0.165774	0.05854	0.016318	0
187	0	0.409383	0.409383	0.343045	0.169071	0.064017	0.014484	0
187	3	0.41497	0.41497	0.339773	0.167727	0.060029	0.017501	0
187	3	0.410936	0.410936	0.345706	0.163369	0.06267	0.017319	0
187	3	0.411994	0.411994	0.343413	0.164198	0.063725	0.01667	0
187	6	0.411609	0.411609	0.34407	0.16393	0.062198	0.018193	0
187	6	0.403066	0.403066	0.342012	0.165269	0.072622	0.017031	0
187	6	0.409003	0.409003	0.340152	0.167355	0.065989	0.017501	0
187	15	0.402779	0.402779	0.334459	0.166397	0.067119	0.02157	0.007676
187	15	0.402248	0.402248	0.341081	0.163305	0.065336	0.020495	0.007535
187	63	0.381705	0.381705	0.329289	0.166729	0.07888	0.029293	0.014103
187	63	0.371734	0.371734	0.319836	0.165098	0.081395	0.034411	0.019063
188	0	0.011738	0.011738	0.222704	0.319114	0.244471	0.117247	0.061151
188	0	0.546145	0.546145	0.249629	0.145846	0.05874	-0.00036	0
188	3	0.108298	0.108298	0.23776	0.227614	0.199911	0.076655	0.138011
188	3	0.210923	0.210923	0.361763	0.248492	0.045349	0.0389	0.030329
188	3	0.0316133	0.031613	0.213664	0.31812	0.232336	0.1102	0.06292
188	6	0.0207638	0.020764	0.248993	0.321054	0.222865	0.127075	0.051552
188	6	0.293029	0.293029	0.218276	0.270954	0.059418	0.047539	0.110908
188	6	0.101123	0.101123	0.276989	0.269662	0.13389	0.081769	0.054615
188	15	0.0181643	0.018164	0.233823	0.297543	0.251285	0.117807	0.068238
188	15	0.0279349	0.027935	0.213142	0.333144	0.233838	0.119417	0.037075
188	63	0.370462	0.370462	0.297871	0.17083	0.085678	0.034847	0.035268
188	63	0.0137676	0.013768	0.226559	0.321472	0.218356	0.125311	0.059573
189	0	0.354955	0.354955	0.33951	0.188398	0.081838	0.028259	0.007041
189	3	0.351811	0.351811	0.338747	0.193539	0.079966	0.027386	0.008551
189	6	0.361005	0.361005	0.33365	0.189723	0.079399	0.027318	0.008905
189	15	0.345512	0.345512	0.334131	0.196551	0.082749	0.03109	0.009967
189	63	0.326336	0.326336	0.319038	0.193	0.096304	0.039996	0.018458
190	0	0.415569	0.415569	0.34887	0.169476	0.057617	0.008468	0
190	0	0.412039	0.412039	0.364658	0.168458	0.050499	0.004346	0
190	3	0.40974	0.40974	0.337048	0.181759	0.061281	0.010173	0
190	3	0.418383	0.418383	0.353634	0.163334	0.056637	0.008012	0
190	3	0.408804	0.408804	0.364196	0.169417	0.048017	0.009566	0
190	6	0.39097	0.39097	0.35853	0.171054	0.066742	0.012704	0
190	6	0.406297	0.406297	0.361112	0.167123	0.055472	0.009997	0
190	6	0.424242	0.424242	0.333909	0.162169	0.064535	0.015145	0
190	15	0.374678	0.374678	0.364283	0.175252	0.067368	0.018419	0
190	15	0.403949	0.403949	0.339582	0.166625	0.071276	0.018568	0
190	63	0.374454	0.374454	0.327345	0.1701	0.071115	0.044605	0.012381
190	63	0.35196	0.35196	0.321545	0.186656	0.092767	0.03792	0.009152
191	0	0.248182	0.248182	0.243542	0.13035	0.057543	0.162791	0.109721
191	3	0.316542	0.316542	0.289766	0.166787	0.081568	0.084496	0.052456
191	3	0.306416	0.306416	0.273069	0.185438	0.070864	0.093766	0.061331
191	6	0.28202	0.28202	0.269385	0.165024	0.066683	0.131633	0.074526
191	6	0.313768	0.313768	0.291293	0.180692	0.080072	0.070195	0.054938
191	15	0.218715	0.218715	0.234629	0.140516	0.062911	0.174795	0.124742
191	15	0.284373	0.284373	0.282736	0.170341	0.092638	0.095997	0.056059
191	63	0.308019	0.308019	0.29532	0.177523	0.092166	0.076468	0.045594
191	63	0.312048	0.312048	0.302086	0.192326	0.097749	0.062755	0.03085
192	0	0.326794	0.326794	0.329713	0.180615	0.08408	0.042076	0.031216
192	3	0.33874	0.33874	0.334218	0.192288	0.08251	0.038888	0.013357
192	3	0.341661	0.341661	0.334974	0.192042	0.08478	0.030697	0.015845
192	6	0.414381	0.414381	0.37357	0.165263	0.039828	0.006959	0
192	6	0.343666	0.343666	0.322631	0.204102	0.078493	0.034653	0.016455
192	6	0.338063	0.338063	0.334451	0.185831	0.086313	0.034615	0.018376
192	15	0.326738	0.326738	0.311596	0.196272	0.098735	0.039286	0.021325
192	15	0.325202	0.325202	0.328492	0.191191	0.083781	0.036644	0.029176
192	63	0.318333	0.318333	0.305702	0.178106	0.086227	0.056139	0.046875
192	63	0.297463	0.297463	0.319854	0.18502	0.091763	0.053732	0.041799
193	0	0.389698	0.389698	0.350743	0.188387	0.062142	0.00903	0
193	0	0.394606	0.394606	0.361714	0.173432	0.058979	0.011269	0
193	3	0.392802	0.392802	0.353837	0.175822	0.060202	0.017337	0
193	3	0.394443	0.394443	0.349932	0.186605	0.060108	0.008912	0
193	3	0.395431	0.395431	0.351599	0.172354	0.0649	0.015716	0
193	6	0.395992	0.395992	0.348019	0.174193	0.063118	0.018677	0
193	6	0.409338	0.409338	0.336489	0.174419	0.064398	0.015357	0
193	6	0.394578	0.394578	0.349025	0.172383	0.059812	0.020337	0.003866
193	15	0.376707	0.376707	0.354819	0.178173	0.06267	0.02337	0.004261
193	15	0.380635	0.380635	0.346117	0.182426	0.068182	0.019271	0.00337
193	63	0.348235	0.348235	0.328005	0.178386	0.079358	0.036387	0.017889
193	63	0.357886	0.357886	0.319822	0.175481	0.083111	0.036625	0.018899
194	0	0.388545	0.388545	0.417811	0.190074	0.003571	0	0
194	0	0.43435	0.43435	0.368343	0.166434	0.028927	0.001947	0
194	3	0.269304	0.269304	0.231735	0.095599	0.100187	0.114772	0.113544
194	3	0.196871	0.196871	0.150595	0.045883	0.198085	0.201388	0.096248
194	15	0.396099	0.396099	0.401582	0.163953	0.042096	-0.003729	0
195	3	0.0594188	0.059419	0.285478	0.320873	0.200085	0.093173	0.031045
195	3	0.0301355	0.030136	0.288604	0.318792	0.21638	0.099253	0.03634
195	6	0.466828	0.466828	0.284182	0.162455	0.071516	0.01502	0
195	6	0.0672589	0.067259	0.290935	0.309707	0.196376	0.091924	0.034031
195	15	0.0730771	0.073077	0.29037	0.298538	0.196321	0.093755	0.035212
196	0	0.163992	0.163992	0.27834	0.261874	0.172179	0.080268	0.03281
196	0	0.216702	0.216702	0.294557	0.236054	0.156729	0.061864	0.023479
196	3	0.189767	0.189767	0.292884	0.249069	0.153674	0.074303	0.029588
196	3	0.211214	0.211214	0.305648	0.244131	0.140719	0.062851	0.026696
196	3	0.212271	0.212271	0.297116	0.241236	0.151114	0.06481	0.024462
196	6	0.181552	0.181552	0.289707	0.250159	0.159455	0.07705	0.030631
196	6	0.213675	0.213675	0.304963	0.240629	0.147057	0.061332	0.023057
196	6	0.204263	0.204263	0.290874	0.237061	0.173096	0.059039	0.022716
196	15	0.196701	0.196701	0.290948	0.24836	0.150061	0.07055	0.030701
196	15	0.212138	0.212138	0.296921	0.238095	0.145913	0.06825	0.026367
196	63	0.19478	0.19478	0.2613	0.209407	0.201753	0.065195	0.03314
196	63	0.191911	0.191911	0.283336	0.222343	0.155056	0.070058	0.039089
197	3	0.374807	0.374807	0.345366	0.17415	0.068264	0.025521	0.011892
197	15	0.253352	0.253352	0.297164	0.13536	0.050444	0.108471	0.081684
197	15	0.244317	0.244317	0.224123	0.107755	0.049204	0.13216	0.137944
197	63	0.192224	0.192224	0.223934	0.108758	0.051517	0.147947	0.148694
198	0	0.229813	0.229813	0.326809	0.237804	0.127437	0.053018	0.019018
198	0	0.228437	0.228437	0.317998	0.245298	0.12991	0.052232	0.019642
198	3	0.229537	0.229537	0.32279	0.239119	0.125386	0.054626	0.021798
198	3	0.234748	0.234748	0.32048	0.238897	0.125717	0.053923	0.019784
198	3	0.228207	0.228207	0.319279	0.240999	0.133854	0.053067	0.017868
198	6	0.228817	0.228817	0.317917	0.237292	0.1311	0.055218	0.021823
198	6	0.232205	0.232205	0.317729	0.238211	0.12927	0.054246	0.020926
198	6	0.232202	0.232202	0.318453	0.241628	0.123223	0.055129	0.021805
198	15	0.228382	0.228382	0.309109	0.237606	0.126101	0.05944	0.026989
198	15	0.223357	0.223357	0.313868	0.237461	0.128494	0.059376	0.025175
198	63	0.212317	0.212317	0.295869	0.228782	0.131308	0.06498	0.036731
198	63	0.211363	0.211363	0.284673	0.226114	0.127452	0.064851	0.038871
199	0	0.34567	0.34567	0.345463	0.195179	0.080737	0.025704	0.007248
199	0	0.337382	0.337382	0.346624	0.204401	0.079089	0.026212	0.006294
199	3	0.341252	0.341252	0.351309	0.194724	0.079559	0.025256	0.007899
199	3	0.339417	0.339417	0.347483	0.199624	0.080793	0.025281	0.007402
199	3	0.340068	0.340068	0.350193	0.196202	0.081163	0.025452	0.006922
199	6	0.335601	0.335601	0.344824	0.197351	0.085763	0.028939	0.007521
199	6	0.336247	0.336247	0.344161	0.199792	0.084568	0.027142	0.008091
199	6	0.344055	0.344055	0.344621	0.194188	0.080778	0.027834	0.008525
199	15	0.333361	0.333361	0.342215	0.193561	0.083227	0.03402	0.013616
199	15	0.331859	0.331859	0.341014	0.194527	0.088222	0.03173	0.012648
199	63	0.30797	0.30797	0.319917	0.196875	0.098101	0.042018	0.022911
199	63	0.302442	0.302442	0.311364	0.195822	0.095661	0.05056	0.028958
200	0	0.137694	0.137694	0.235665	0.240887	0.179208	0.133122	0.040205
200	6	0.132847	0.132847	0.25104	0.246898	0.166015	0.122074	0.056608
200	6	0.168087	0.168087	0.285771	0.24846	0.150169	0.1031	0.035643
200	63	0.148999	0.148999	0.255228	0.235027	0.179344	0.09981	0.039356
201	0	0.439766	0.439766	0.332958	0.1538	0.056485	0.016991	0
201	0	0.433348	0.433348	0.330852	0.160752	0.056305	0.018743	0
201	3	0.432789	0.432789	0.337531	0.158068	0.055145	0.016467	0
201	3	0.439171	0.439171	0.324224	0.163135	0.056826	0.016645	0
201	3	0.434186	0.434186	0.325502	0.164552	0.057893	0.017868	0
201	6	0.431929	0.431929	0.335567	0.158633	0.057559	0.016312	0
201	6	0.430339	0.430339	0.329256	0.160919	0.061707	0.017779	0
201	6	0.428851	0.428851	0.32256	0.167305	0.063015	0.018268	0
201	15	0.421926	0.421926	0.318996	0.163708	0.064563	0.023982	0.006825
201	15	0.411635	0.411635	0.327843	0.164927	0.065383	0.022617	0.007595
201	63	0.402222	0.402222	0.325237	0.169062	0.065982	0.029619	0.007878
201	63	0.407749	0.407749	0.319145	0.167516	0.068435	0.027626	0.009529
202	0	0.378617	0.378617	0.333506	0.17826	0.070886	0.022532	0.016198
202	0	0.381972	0.381972	0.320103	0.173167	0.064993	0.021941	0.037668
202	3	0.383574	0.383574	0.327017	0.171462	0.072487	0.024698	0.019826
202	3	0.385403	0.385403	0.332321	0.179961	0.071292	0.023399	0.007624
202	3	0.381934	0.381934	0.332503	0.178176	0.073509	0.025012	0.008867
202	6	0.376179	0.376179	0.325853	0.175156	0.072749	0.023149	0.026634
202	6	0.388438	0.388438	0.328167	0.176344	0.073349	0.023246	0.010456
202	6	0.391487	0.391487	0.325434	0.178699	0.073877	0.023046	0.007458
202	15	0.385765	0.385765	0.325014	0.180936	0.074637	0.024674	0.008974
202	15	0.37841	0.37841	0.325274	0.173945	0.075219	0.025769	0.019343
202	63	0.350862	0.350862	0.316831	0.172252	0.074029	0.028398	0.057322
202	63	0.348576	0.348576	0.281103	0.172583	0.076109	0.030893	0.087563
203	0	0.554437	0.554437	0.316033	0.10418	0.02535	0	0
203	0	0.565742	0.565742	0.310839	0.102334	0.021086	0	0
203	3	0.557723	0.557723	0.312987	0.103981	0.025309	0	0
203	3	0.553396	0.553396	0.311113	0.110427	0.025065	0	0
203	6	0.555027	0.555027	0.306203	0.108083	0.028192	0.002495	0
203	6	0.558806	0.558806	0.309133	0.107393	0.024667	0	0
203	15	0.542503	0.542503	0.301318	0.119924	0.031893	0.004362	0
203	15	0.543367	0.543367	0.301628	0.117743	0.02916	0.008103	0
203	63	0.515693	0.515693	0.307806	0.126979	0.038576	0.010945	0
203	63	0.489273	0.489273	0.326769	0.128376	0.04236	0.013222	0
204	0	0.403874	0.403874	0.350838	0.159756	0.055149	0.020672	0.009712
204	0	0.243848	0.243848	0.19918	0.098736	0.164518	0.167743	0.089808
204	3	0.385701	0.385701	0.328009	0.148032	0.065669	0.038354	0.022568
204	3	0.107128	0.107128	0.086866	0.044741	0.274778	0.285776	0.133225
204	3	0.121229	0.121229	0.101747	0.050079	0.261234	0.275023	0.129393
204	6	0.414302	0.414302	0.350606	0.165353	0.054684	0.015055	0
204	6	0.100606	0.100606	0.085076	0.042985	0.266383	0.285025	0.151676
204	6	0.249111	0.249111	0.216492	0.098566	0.151507	0.165751	0.086654
204	15	0.301935	0.301935	0.250124	0.127404	0.11883	0.108838	0.062031
204	63	0.100359	0.100359	0.091086	0.046984	0.285987	0.234228	0.137109
204	63	0.278419	0.278419	0.245032	0.136126	0.123677	0.10585	0.062672
205	0	0.360397	0.360397	0.264851	0.117471	0.149866	0.08754	0.019363
205	0	0.432585	0.432585	0.313307	0.154405	0.073301	0.022067	0.004335
205	3	0.425726	0.425726	0.325832	0.141091	0.077373	0.024181	0.005798
205	6	0.418326	0.418326	0.317274	0.140581	0.084591	0.033748	0.00548
205	6	0.394399	0.394399	0.314206	0.147036	0.099314	0.036985	0.00806
205	63	0.371575	0.371575	0.323428	0.170966	0.092777	0.031669	0.009584
206	0	0.198239	0.198239	0.321486	0.260495	0.138787	0.056677	0.018164
206	0	0.188757	0.188757	0.324957	0.265081	0.135604	0.055743	0.021814
206	3	0.190084	0.190084	0.327911	0.259055	0.138702	0.059609	0.021558
206	3	0.191453	0.191453	0.330344	0.249954	0.145138	0.058403	0.020629
206	3	0.203929	0.203929	0.333644	0.241418	0.142874	0.05383	0.018394
206	6	0.18106	0.18106	0.321722	0.269987	0.139782	0.059952	0.020841
206	6	0.201752	0.201752	0.328554	0.25679	0.138169	0.052669	0.018014
206	6	0.213175	0.213175	0.325153	0.249009	0.142494	0.056289	0.013882
206	15	0.198036	0.198036	0.314501	0.254021	0.142625	0.058214	0.023221
206	15	0.186994	0.186994	0.320197	0.256674	0.146138	0.058257	0.022728
206	63	0.188114	0.188114	0.315161	0.254821	0.13142	0.070474	0.027502
206	63	0.173755	0.173755	0.305885	0.248155	0.143925	0.068934	0.033558
207	0	0.250762	0.250762	0.341383	0.230416	0.11695	0.039608	0.017872
207	0	0.260007	0.260007	0.345782	0.230519	0.110302	0.040821	0.012569
207	3	0.247766	0.247766	0.336045	0.229653	0.11451	0.044568	0.024948
207	3	0.265967	0.265967	0.327839	0.221118	0.116227	0.045965	0.019248
207	3	0.240852	0.240852	0.330905	0.235933	0.129601	0.04735	0.015359
207	6	0.232555	0.232555	0.333589	0.225821	0.115069	0.055861	0.034102
207	6	0.255701	0.255701	0.331831	0.236127	0.105582	0.048458	0.01739
207	6	0.245743	0.245743	0.314947	0.236111	0.126355	0.048796	0.023211
207	15	0.232431	0.232431	0.31463	0.225773	0.124073	0.063532	0.031476
207	15	0.244403	0.244403	0.302574	0.215279	0.123633	0.056331	0.032003
207	63	0.212678	0.212678	0.273059	0.213599	0.125721	0.083035	0.044668
207	63	0.206367	0.206367	0.267972	0.21952	0.116682	0.077251	0.04954
208	0	0.35516	0.35516	0.341413	0.194731	0.072967	0.031577	0.004151
208	0	0.348368	0.348368	0.353947	0.184474	0.079075	0.026028	0.008108
208	3	0.35355	0.35355	0.339554	0.202765	0.075691	0.025537	0.002903
208	3	0.348473	0.348473	0.348815	0.196436	0.074415	0.025905	0.005956
208	3	0.33915	0.33915	0.334675	0.209682	0.080289	0.029306	0.006898
208	6	0.337032	0.337032	0.353696	0.19704	0.077475	0.028228	0.006529
208	6	0.342815	0.342815	0.353836	0.19137	0.082989	0.021357	0.007632
208	6	0.345592	0.345592	0.353536	0.193836	0.071948	0.029817	0.005271
208	15	0.342239	0.342239	0.342724	0.192135	0.082568	0.030088	0.010246
208	15	0.331062	0.331062	0.339556	0.201922	0.086957	0.030271	0.010232
208	63	0.331766	0.331766	0.314805	0.192985	0.090666	0.041698	0.017378
208	63	0.31843	0.31843	0.320347	0.192652	0.08884	0.044584	0.021879
209	0	0.493749	0.493749	0.331342	0.129831	0.036753	0.008326	0
209	0	0.489419	0.489419	0.334264	0.12996	0.037413	0.008944	0
209	3	0.488234	0.488234	0.334046	0.130644	0.038272	0.008804	0
209	3	0.487588	0.487588	0.332466	0.132216	0.038873	0.008857	0
209	3	0.488401	0.488401	0.336227	0.12968	0.037508	0.008184	0
209	6	0.490162	0.490162	0.330507	0.132023	0.038559	0.008748	0
209	6	0.484578	0.484578	0.336673	0.132329	0.037776	0.008644	0
209	6	0.488751	0.488751	0.331034	0.132472	0.038525	0.009218	0
209	15	0.48531	0.48531	0.33052	0.132522	0.040912	0.010736	0
209	15	0.483506	0.483506	0.331391	0.133259	0.040458	0.011385	0
209	63	0.470102	0.470102	0.325791	0.140203	0.047795	0.01611	0
209	63	0.459935	0.459935	0.32741	0.142662	0.05198	0.018013	0
210	0	0.257018	0.257018	0.338156	0.225575	0.112461	0.042255	0.019353
210	0	0.24242	0.24242	0.339028	0.254357	0.114845	0.043584	0.005767
210	3	0.251747	0.251747	0.33902	0.221394	0.12583	0.040316	0.01791
210	3	0.258607	0.258607	0.328071	0.23143	0.116781	0.040187	0.019573
210	6	0.259473	0.259473	0.32931	0.231599	0.116433	0.043404	0.017667
210	6	0.251228	0.251228	0.329116	0.227774	0.119703	0.0507	0.016668
210	6	0.250584	0.250584	0.328848	0.236351	0.113822	0.046594	0.018435
210	15	0.255281	0.255281	0.321924	0.229856	0.111279	0.052157	0.019537
210	15	0.247094	0.247094	0.323539	0.232235	0.11848	0.048504	0.021992
210	63	0.225886	0.225886	0.297699	0.211175	0.119872	0.061904	0.040972
211	0	0.230849	0.230849	0.340892	0.250388	0.117023	0.04626	0.014587
211	0	0.231315	0.231315	0.347739	0.244688	0.117318	0.044776	0.014165
211	3	0.233287	0.233287	0.336643	0.251467	0.116383	0.045895	0.016325
211	3	0.231336	0.231336	0.344765	0.245052	0.118024	0.046241	0.014582
211	3	0.23078	0.23078	0.34351	0.247016	0.117806	0.046123	0.014766
211	6	0.231497	0.231497	0.342501	0.247799	0.119607	0.044003	0.014593
211	6	0.22979	0.22979	0.342471	0.248453	0.117848	0.046196	0.015242
211	6	0.232865	0.232865	0.338886	0.247931	0.117901	0.047252	0.015165
211	15	0.226107	0.226107	0.338216	0.247873	0.116283	0.048374	0.01712
211	15	0.226741	0.226741	0.343233	0.245003	0.121632	0.046697	0.016694
211	63	0.223848	0.223848	0.331084	0.239553	0.122886	0.052802	0.020956
211	63	0.222542	0.222542	0.326728	0.240127	0.123718	0.052202	0.023429
212	0	0.357565	0.357565	0.342401	0.191529	0.076694	0.025469	0.006343
212	3	0.351288	0.351288	0.34504	0.195725	0.07678	0.023946	0.007221
212	6	0.351219	0.351219	0.348463	0.188677	0.073973	0.029112	0.008555
212	63	0.322241	0.322241	0.32714	0.198491	0.085093	0.042008	0.017531
212	63	0.308861	0.308861	0.325514	0.187336	0.103012	0.04666	0.02099
213	0	0.375254	0.375254	0.33421	0.214496	0.071081	0.004959	0
213	0	0.38936	0.38936	0.315276	0.220089	0.075275	0	0
213	3	0.358513	0.358513	0.290309	0.183121	0.131198	0.025974	0.010886
213	3	0.342772	0.342772	0.304684	0.221547	0.103142	0.027855	0
213	3	0.355743	0.355743	0.275112	0.24594	0.090374	0.027523	0.005308
213	6	0.358908	0.358908	0.293137	0.212434	0.102631	0.018068	0.014823
213	6	0.378962	0.378962	0.298793	0.184684	0.124368	0.013193	0
213	6	0.404601	0.404601	0.277401	0.246801	0.061129	0.010067	0
213	15	0.375069	0.375069	0.272311	0.245941	0.081752	0.022129	0.002798
213	15	0.357411	0.357411	0.328252	0.210532	0.061864	0.025478	0.016463
213	63	0.342281	0.342281	0.23102	0.262378	0.13202	0.023417	0.008884
213	63	0.352827	0.352827	0.25096	0.231698	0.13173	0.031335	0.00145
214	0	0.391512	0.391512	0.333929	0.18499	0.0741	0.015468	0
214	0	0.279042	0.279042	0.271054	0.132169	0.051245	0.019708	0.084469
214	3	0.355283	0.355283	0.358904	0.20382	0.067841	0.014151	0
214	3	0.188791	0.188791	0.200555	0.1014	0.034614	0.011815	0.180933
214	3	0.390795	0.390795	0.310944	0.201412	0.088243	0.008605	0
214	6	0.286083	0.286083	0.330196	0.135177	0.055536	0.016706	0.060162
214	6	0.304651	0.304651	0.297709	0.159675	0.082127	0.023947	0.053605
214	15	0.241555	0.241555	0.205759	0.123294	0.055783	0.012567	0.14292
214	15	0.148767	0.148767	0.126667	0.064584	0.031423	0.013358	0.222752
214	63	0.26224	0.26224	0.25542	0.133128	0.060055	0.035029	0.103165
214	63	0.243838	0.243838	0.239046	0.132633	0.07065	0.047215	0.104877
215	0	0.583293	0.583293	0.29586	0.100078	0.020769	0	0
215	6	0.571197	0.571197	0.303601	0.096721	0.028481	0	0
215	15	0.557568	0.557568	0.303143	0.112029	0.02726	0	0
215	63	0.533326	0.533326	0.303041	0.118707	0.038002	0.006925	0
216	0	0.310786	0.310786	0.31032	0.161305	0.120715	0.063828	0.025294
216	3	0.296967	0.296967	0.303969	0.169934	0.119832	0.070618	0.028947
216	3	0.337455	0.337455	0.344437	0.177723	0.086211	0.040623	0.01355
216	6	0.324842	0.324842	0.341257	0.164722	0.090907	0.053986	0.017754
216	6	0.341251	0.341251	0.337535	0.197259	0.085277	0.0301	0.008578
216	15	0.323126	0.323126	0.347344	0.197546	0.086392	0.033466	0.012125
216	15	0.25742	0.25742	0.261244	0.172753	0.151731	0.106864	0.03733
216	63	0.323518	0.323518	0.331591	0.17535	0.082108	0.052993	0.025276
217	0	0.124458	0.124458	0.222106	0.241542	0.211326	0.121449	0.054412
217	3	0.109642	0.109642	0.221044	0.206266	0.188379	0.12729	0.076255
217	6	0.0965748	0.096575	0.190879	0.216772	0.191692	0.129904	0.079089
217	6	0.109012	0.109012	0.170334	0.241521	0.174096	0.123992	0.083078
217	6	0.0891303	0.08913	0.199529	0.233855	0.176605	0.128657	0.076232
217	15	0.0823414	0.082341	0.174399	0.210937	0.172054	0.111523	0.096355
217	63	0.0655412	0.065541	0.151198	0.154092	0.14292	0.113608	0.109983
218	0	0.339874	0.339874	0.362421	0.254493	0.034521	0.008691	0
218	3	0.354708	0.354708	0.336074	0.197125	0.074828	0.035297	0.001969
218	3	0.354318	0.354318	0.347294	0.200841	0.079892	0.017655	0
218	6	0.382207	0.382207	0.31512	0.203871	0.074048	0.024753	0
218	15	0.336147	0.336147	0.370937	0.184599	0.074524	0.030907	0.002885
218	15	0.343791	0.343791	0.358771	0.168142	0.100992	0.024771	0.003532
218	63	0.32699	0.32699	0.307603	0.191745	0.109718	0.038544	0.021961
218	63	0.324284	0.324284	0.315484	0.179118	0.103327	0.052477	0.018323
219	0	0.251079	0.251079	0.318222	0.240079	0.114065	0.051864	0.019281
219	0	0.256334	0.256334	0.323097	0.2273	0.122368	0.051048	0.01657
219	3	0.252311	0.252311	0.316197	0.229097	0.125326	0.052492	0.018765
219	3	0.253307	0.253307	0.318628	0.231073	0.12436	0.051253	0.017169
219	3	0.253392	0.253392	0.321473	0.229015	0.120922	0.052596	0.017438
219	6	0.255067	0.255067	0.314887	0.231689	0.122582	0.052594	0.01735
219	6	0.253366	0.253366	0.314747	0.231031	0.123915	0.05304	0.017678
219	6	0.258175	0.258175	0.321298	0.225851	0.118607	0.052399	0.017975
219	15	0.24977	0.24977	0.312997	0.231833	0.121728	0.054939	0.021523
219	15	0.248796	0.248796	0.317704	0.222362	0.127988	0.054988	0.020987
219	63	0.224261	0.224261	0.289757	0.272592	0.110741	0.056236	0.034217
219	63	0.219342	0.219342	0.280422	0.220727	0.126783	0.078432	0.037664
220	0	0.210209	0.210209	0.306427	0.251491	0.13991	0.061688	0.023056
220	0	0.206328	0.206328	0.30651	0.257183	0.138011	0.06308	0.021601
220	3	0.207515	0.207515	0.310548	0.245584	0.1438	0.059998	0.025051
220	3	0.209099	0.209099	0.309147	0.243737	0.142171	0.064231	0.023883
220	3	0.207825	0.207825	0.306993	0.250692	0.139565	0.062995	0.024655
220	6	0.207369	0.207369	0.306122	0.241476	0.146795	0.065345	0.024268
220	6	0.203204	0.203204	0.310843	0.24815	0.141201	0.06368	0.024739
220	6	0.205182	0.205182	0.308369	0.250713	0.139284	0.063597	0.024638
220	15	0.203365	0.203365	0.301916	0.246611	0.142015	0.067713	0.027068
220	15	0.206501	0.206501	0.302568	0.249116	0.142019	0.065344	0.024346
220	63	0.193776	0.193776	0.29508	0.239741	0.1428	0.070554	0.032292
220	63	0.190912	0.190912	0.286691	0.237172	0.144245	0.072511	0.038436
221	0	0.223027	0.223027	0.336129	0.245931	0.120594	0.045036	0.021429
221	0	0.240314	0.240314	0.313952	0.242483	0.129786	0.049187	0.018846
221	3	0.225638	0.225638	0.327627	0.232981	0.132091	0.053918	0.023479
221	3	0.215523	0.215523	0.324465	0.24281	0.140914	0.050926	0.020611
221	3	0.225454	0.225454	0.31773	0.238216	0.132876	0.056932	0.024474
221	6	0.228952	0.228952	0.318568	0.244308	0.123736	0.052313	0.020628
[truncated: 822 more rows]
