# Supplementary material for: Heterogeneity of proteome dynamics between connective tissue phases of adult tendon
Source: eLife. 2020 May 12;9:e55262. doi: 10.7554/eLife.55262 (PMC7217697; doi:10.7554/eLife.55262)
Supplement: Figure 7—source data 2. — hl tab contains protein half-life information organized by peptide sequence and hl-data tab contains isotopomer relative abundance at each time point. [file elife-55262-fig7-data2.xlsx]

## Sheet: hl
ID	Uniprot	Peptide	DP	z	mi	SS	a	pss	kp	N	k	dk	R2
0	P02466	GLVGEP(15.9949)GPAGSK	8	2	0	0.018421	0.538793	0.0558	0.7913	26	0.00063	0.000488	-0.303391
1	P02466	TGEIGASGPP(15.9949)GFAGEK	11	2	0	0.014667	0.427899	0.0558	0.7913	36	0.001141	0.000535	0.381208
2	P02466	SGHP(15.9949)GPVGPAGVR	6	2	0	0.038466	0.501737	0.0558	0.7913	30	0.00134	0.001726	-0.176127
3	P02466	VGAP(15.9949)GPAGAR	8	2	0	0.029292	0.609022	0.0558	0.7913	27	0.000104	0.000685	-1.14662
4	P02466	GPNGDAGRP(15.9949)GEP(15.9949)GLM(15.9949)GPR	5	3	0	0.033607	0.347583	0.0558	0.7913	43	0.000378	0.001956	-0.005199
5	P02466	GPP(15.9949)GAVGSP(15.9949)GVNGAP(15.9949)GEAGR	11	2	0	0.037581	0.36627	0.0558	0.7913	50	0.000623	0.001908	0.02371
6	P02466	GIP(15.9949)GPVGAAGATGPR	10	2	0	0.010815	0.47774	0.0558	0.7913	35	0.001561	0.00033	0.744601
7	P02466	GEAGNIGFP(15.9949)GP(15.9949)K	4	2	0	0.102666	0.495978	0.0558	0.7913	25	0.015759	0.013857	-0.149238
8	P02466	SGHPGPVGPAGVR	8	3	0	0.0328	0.513836	0.0558	0.7913	30	0.001874	0.005404	-0.076065
9	P02466	GPSGAP(15.9949)GPDGNKGEAGAVGAP(15.9949)GSAGASGPGGLP(15.9949)GER	5	3	0	0.010444	0.181705	0.0558	0.7913	91	0.000546	0.000765	-0.211775
10	P02466	TGPP(15.9949)GPSGITGPP(15.9949)GPP(15.9949)GAAGK	6	2	0	0.023287	0.341476	0.0558	0.7913	45	0.000455	0.00085	-0.742203
11	P02466	GEAGAAGPSGPAGPR	7	2	0	0.019987	0.508961	0.0558	0.7913	44	0.004132	0.003452	0.287033
12	P02466	HGNRGEPGPAGSVGPVGAVGPR	4	3	0	0.027072	0.326872	0.0558	0.7913	53	0.006238	0.007548	0.275362
13	P02466	GLP(15.9949)GEFGLP(15.9949)GP(15.9949)AGPR	7	2	0	0.027596	0.406839	0.0558	0.7913	34	0.000455	0.000838	-1.01975
14	P02466	GELGPVGNP(15.9949)GPAGPAGPR	7	2	0	0.022355	0.39847	0.0558	0.7913	44	0.000539	0.000835	-0.281866
15	P02466	GSP(15.9949)GEP(15.9949)GSAGPAGP(15.9949)PGLR	6	2	0	0.024289	0.393248	0.0558	0.7913	47	0.000912	0.000879	0.143822
16	P02466	GETGLRGEIGNP(15.9949)GR	7	3	0	0.015608	0.457791	0.0558	0.7913	31	0.000508	0.000561	-0.168701
17	P02466	HGNRGEP(15.9949)GPAGSVGPVGAVGPR	5	4	0	0.011298	0.319176	0.0558	0.7913	53	0.002881	0.003058	0.307398
18	P02466	GAP(15.9949)GAIGAP(15.9949)GPAGASGDR	9	2	0	0.033592	0.426647	0.0558	0.7913	49	0.001553	0.001552	0.230426
19	P02466	GPAGPSGPIGK	11	2	0	0.007122	0.589503	0.0558	0.7913	24	0.001645	0.000259	0.868298
20	P02466	GATGLP(15.9949)GVAGAP(15.9949)GLP(15.9949)GPR	9	2	0	0.023919	0.387404	0.0558	0.7913	40	0.000401	0.000799	-0.580859
21	P02466	GP(15.9949)PGAVGSP(15.9949)GVNGAP(15.9949)GEAGR	7	3	0	0.028778	0.36627	0.0558	0.7913	50	0.003384	0.001805	0.401795
22	P02466	GDGGPP(15.9949)GMTGFP(15.9949)GAAGR	4	2	0	0.01872	0.398936	0.0558	0.7913	37	0.000531	0.000805	-0.030565
23	P02466	GPSGAPGP(15.9949)DGNKGEAGAVGAP(15.9949)GSAGASGPGGLP(15.9949)GER	6	3	0	0.028692	0.181705	0.0558	0.7913	91	0.000256	0.001957	-0.975667
24	P02466	GAP(15.9949)GAIGAPGP(15.9949)AGASGDRGEAGAAGPSGPAGPR	6	3	0	0.012553	0.217665	0.0558	0.7913	93	0.001172	0.000825	0.203367
25	P02466	GEP(15.9949)GPAGSVGPVGAVGPR	8	2	0	0.013636	0.408879	0.0558	0.7913	42	0.00163	0.000479	0.527284
26	P02466	GENGIVGPTGPVGAAGPSGPNGPP(15.9949)GPAGSR	5	3	0	0.063439	0.234957	0.0558	0.7913	69	0.002759	0.005446	-0.44479
27	P02466	GSP(15.9949)GEP(15.9949)GSAGPAGPP(15.9949)GLR	10	2	0	0.024674	0.393248	0.0558	0.7913	47	0.000783	0.000748	-0.273508
28	P02466	SGHP(15.9949)GPVGPAGVR	5	3	0	0.014681	0.501737	0.0558	0.7913	30	0.001111	0.000676	0.46206
29	P02466	GATGLP(15.9949)GVAGAP(15.9949)GLPGP(15.9949)R	7	2	0	0.022725	0.387404	0.0558	0.7913	40	0.000485	0.000847	-0.237382
30	P02466	GAP(15.9949)GAIGAP(15.9949)GPAGASGDRGEAGAAGPSGPAGPR	5	3	0	0.005264	0.217665	0.0558	0.7913	93	0.00134	0.000395	0.73668
31	P02466	GPAGPSGPIGKDGR	4	3	0	0.043677	0.499014	0.0558	0.7913	32	0.001202	0.00843	-0.064386
32	P02466	GEPGPAGSVGPVGAVGPR	7	2	0	0.015048	0.418739	0.0558	0.7913	42	0.001263	0.000547	0.393838
33	P02466	GDGGPP(15.9949)GM(15.9949)TGFP(15.9949)GAAGR	7	2	0	0.029805	0.389543	0.0558	0.7913	37	0.000577	0.001087	-0.366941
34	P02466	GLP(15.9949)GSP(15.9949)GNVGPAGK	10	2	0	0.016751	0.485779	0.0558	0.7913	28	0.001065	0.000482	0.283607
35	P02466	GYP(15.9949)GNIGPTGAAGAP(15.9949)GPHGSVGPAGK	10	3	0	0.02464	0.26834	0.0558	0.7913	58	0.00163	0.001502	0.007378
36	P02466	GEAGNIGFP(15.9949)GPK	10	2	0	0.012628	0.507938	0.0558	0.7913	25	0.001134	0.000388	0.501763
37	P02466	HGNRGEP(15.9949)GPAGSVGPVGAVGPR	5	3	0	0.014007	0.319176	0.0558	0.7913	53	0.002942	0.00366	0.289642
38	P02466	EGPVGLP(15.9949)GIDGR	9	2	0	0.034404	0.51049	0.0558	0.7913	25	0.001462	0.001633	-0.000334
39	P02466	P(15.9949)GPIGPAGPR	5	2	0	0.052195	0.576255	0.0558	0.7913	25	0.001279	0.002191	-0.365277
40	P02466	GAPGP(15.9949)DGNNGAQGPP(15.9949)GPQGVQGGK	7	3	0	0.015649	0.302337	0.0558	0.7913	58	0.000882	0.000687	-0.036966
41	P02466	GLP(15.9949)GEFGLP(15.9949)GPAGPR	11	2	0	0.024049	0.416649	0.0558	0.7913	34	0.000623	0.000895	-0.231736
42	P02466	GEAGLP(15.9949)GLSGPVGPP(15.9949)GNP(15.9949)GANGLTGAK	4	2	0	0.059293	0.251664	0.0558	0.7913	57	0.015332	0.024129	-0.449111
43	P13941	GEAGAP(15.9949)GVP(15.9949)GGKGDSGAP(15.9949)GER	5	3	0	0.019676	0.34967	0.0558	0.7913	53	0.000226	0.00089	-0.334951
44	P13941	NGDRGETGPAGPSGAP(15.9949)GPAGAR	4	2	0	0.058967	0.344934	0.0558	0.7913	58	0.001721	0.011309	-0.639406
45	P13941	GERGEAGSP(15.9949)GIP(15.9949)GPK	4	3	0	0.04341	0.440449	0.0558	0.7913	38	0.000684	0.002006	-0.050585
46	P13941	GSP(15.9949)GGP(15.9949)GAAGFP(15.9949)GGR	11	2	0	0.026629	0.465695	0.0558	0.7913	37	0.001385	0.000713	0.117452
47	P13941	GGP(15.9949)GGPGLP(15.9949)GPAGK	8	2	0	0.050079	0.506421	0.0558	0.7913	30	0.003461	0.002527	0.137751
48	P13941	GPAGPNGAP(15.9949)GEKGPAGER	6	3	0	0.309983	0.403962	0.0558	0.7913	48	511.3	1.1704e+07	-1.5593
49	P13941	GVAGEP(15.9949)GRDGTP(15.9949)GGP(15.9949)GIR	8	3	0	0.026066	0.379531	0.0558	0.7913	41	0.001141	0.001078	-0.065857
50	P13941	GEAGAP(15.9949)GVPGGKGDSGAP(15.9949)GER	5	3	0	0.029739	0.358102	0.0558	0.7913	53	0.000272	0.001118	-0.793235
51	P13941	GEDGKDGSP(15.9949)GEP(15.9949)GANGVPGNP(15.9949)GER	8	3	0	0.022801	0.281529	0.0558	0.7913	57	0.004987	0.001835	0.250748
52	P13941	DGPP(15.9949)GPAGNSGSP(15.9949)GNP(15.9949)GVAGPK	5	2	0	0.017387	0.330857	0.0558	0.7913	50	0.001546	0.000828	0.425598
53	P13941	GPP(15.9949)GPQGLPGQP(15.9949)GTAGEP(15.9949)GR	5	2	0	0.036699	0.336937	0.0558	0.7913	50	2.7e-05	0.001723	-0.52817
54	P13941	GPP(15.9949)GAQGPP(15.9949)GSP(15.9949)GPLGIAGLTGAR	5	2	0	0.016999	0.287245	0.0558	0.7913	56	0.000417	0.000819	-0.390951
55	P13941	GGP(15.9949)GGP(15.9949)GLP(15.9949)GPAGK	10	2	0	0.029063	0.494497	0.0558	0.7913	30	0.000943	0.000798	-0.190703
56	P13941	GDSGAP(15.9949)GERGPP(15.9949)GTAGTP(15.9949)GLR	7	3	0	0.032109	0.332092	0.0558	0.7913	49	0.001691	0.001301	-0.096391
57	P13941	GLAGPP(15.9949)GMP(15.9949)GPR	5	2	0	0.039896	0.488878	0.0558	0.7913	28	0.002164	0.002082	-0.098898
58	P13941	GLAGPP(15.9949)GMPGP(15.9949)R	4	2	0	0.019698	0.488878	0.0558	0.7913	28	0.001874	0.001096	0.547325
59	P13941	GETGPAGPSGAP(15.9949)GPAGAR	7	2	0	0.010968	0.431101	0.0558	0.7913	49	0.002209	0.000452	0.794689
60	P13941	NGDRGETGPAGPSGAP(15.9949)GPAGAR	9	3	0	0.058101	0.344934	0.0558	0.7913	58	0.003461	0.003657	0.008412
61	P13941	GEAGSP(15.9949)GIP(15.9949)GPK	8	2	0	0.02327	0.526106	0.0558	0.7913	28	0.000996	0.00069	0.186147
62	P13941	GPP(15.9949)GPAGANGAP(15.9949)GQR	6	2	0	0.056221	0.467118	0.0558	0.7913	42	0.001508	0.002557	-0.045214
63	P13941	GRP(15.9949)GLP(15.9949)GAAGAR	4	2	0	0.020406	0.52604	0.0558	0.7913	33	0.000615	0.000724	0.150319
64	P13941	GEM(15.9949)GPAGIP(15.9949)GAP(15.9949)GLLGAR	4	2	0	0.018716	0.3592	0.0558	0.7913	43	0.001492	0.000967	0.477241
65	P13941	DGSSGHP(15.9949)GPIGPP(15.9949)GPR	4	3	0	0.02097	0.418308	0.0558	0.7913	38	0.002118	0.004143	0.140496
66	P13941	GLAGPP(15.9949)GM(15.9949)PGP(15.9949)R	8	2	0	0.023066	0.477366	0.0558	0.7913	28	0.000943	0.000963	0.189723
67	P13941	GPP(15.9949)GTAGTP(15.9949)GLR	6	2	0	0.016623	0.523508	0.0558	0.7913	24	0.001256	0.000647	0.562929
68	P13941	DGSSGHPGPIGPPGP(15.9949)R	6	3	0	0.01872	0.428395	0.0558	0.7913	38	0.003117	0.000744	0.738921
69	P13941	GEP(15.9949)GGAGADGVPGKDGPR	6	3	0	0.026809	0.413529	0.0558	0.7913	42	0.001614	0.001068	0.253865
70	P13941	DGSSGHP(15.9949)GPIGPPGP(15.9949)R	7	3	0	0.023866	0.418308	0.0558	0.7913	38	0.002164	0.000916	0.40529
71	P01946	M(15.9949)FAAFPTTK	8	2	0	0.031427	0.511147	0.0558	0.7913	13	0.021069	0.006196	0.913393
72	P01946	IGGHGGEYGEEALQR	4	3	0	0.015337	0.421384	0.0558	0.7913	38	0.021741	0.003607	0.921164
73	P48679	ITESEEVVSR	5	2	0	0.01228	0.540539	0.0558	0.7913	23	0.044812	0.008297	0.993432
74	P48679	SGAQASSTPLSPTR	7	2	0	0.031258	0.483465	0.0558	0.7913	34	0.034741	0.009511	0.929633
75	P12346	EGVCPEGSIDSAPVK	5	2	0	0.055824	0.426255	0.0558	0.7913	33	0.485547	0.211099	0.810945
76	P12346	DGGGDVAFVK	6	2	0	0.021405	0.582378	0.0558	0.7913	16	0.468945	0.099672	0.985642
77	P12346	VSTVLTAQK	5	2	0	0.019379	0.59026	0.0558	0.7913	13	0.320996	0.05212	0.979226
78	P02454	GAAGLP(15.9949)GP(15.9949)KGDRGDAGPK	5	3	0	0.050867	0.391042	0.0558	0.7913	41	0.024121	0.015637	0.20462
79	P02454	VGPP(15.9949)GPSGNAGPP(15.9949)GPP(15.9949)GPVGK	6	3	0	0.023943	0.333576	0.0558	0.7913	45	0.000333	0.000923	-0.840371
80	P02454	GFSGLQGPP(15.9949)GSPGSP(15.9949)GEQGPSGASGPAGPR	5	3	0	0.027423	0.220881	0.0558	0.7913	76	0.003033	0.002432	-0.76502
81	P02454	GSPGADGPAGSP(15.9949)GTP(15.9949)GPQGIAGQR	7	3	0	0.012808	0.306823	0.0558	0.7913	61	0.001263	0.000676	0.362384
82	P02454	GANGAP(15.9949)GIAGAP(15.9949)GFP(15.9949)GAR	10	2	0	0.117585	0.390279	0.0558	0.7913	47	0.001569	0.005379	-0.378405
83	P02454	GSPGADGPAGSP(15.9949)GTPGPQGIAGQR	7	2	0	0.01657	0.314222	0.0558	0.7913	61	0.001157	0.000832	0.193464
84	P02454	GVQGPP(15.9949)GPAGPR	10	2	0	0.010752	0.529554	0.0558	0.7913	31	0.001439	0.000315	0.739991
85	P02454	DGEAGAQGAPGPAGPAGER	7	2	0	0.009823	0.410757	0.0558	0.7913	57	0.00237	0.000504	0.781916
86	P02454	GEPGP(15.9949)AGVQGPP(15.9949)GPAGEEGKR	7	3	0	0.016933	0.326576	0.0558	0.7913	56	0.000539	0.000581	-0.556024
87	P02454	GPSGPQGPSGAP(15.9949)GPK	8	2	0	0.009263	0.477215	0.0558	0.7913	37	0.001576	0.000306	0.829524
88	P02454	GAAGPP(15.9949)GATGFP(15.9949)GAAGR	11	2	0	0.014485	0.431286	0.0558	0.7913	44	0.001302	0.000441	0.486771
89	P02454	GPP(15.9949)GPM(15.9949)GPPGLAGPP(15.9949)GESGR	5	2	0	0.021183	0.327659	0.0558	0.7913	48	0.000516	0.000875	-0.415993
90	P02454	GVVGLP(15.9949)GQR	5	2	0	0.016196	0.595697	0.0558	0.7913	18	0.001035	0.000632	0.525341
91	P02454	GSPGADGP(15.9949)AGSP(15.9949)GTP(15.9949)GPQGIAGQR	10	3	0	0.091967	0.299598	0.0558	0.7913	61	0.001141	0.005729	-0.018564
92	P02454	GFP(15.9949)GADGVAGPK	10	2	0	0.064562	0.528262	0.0558	0.7913	25	0.000851	0.002689	-0.050552
93	P02454	DGEAGAQGAP(15.9949)GPAGPAGER	9	2	0	0.009263	0.401085	0.0558	0.7913	57	0.002095	0.000438	0.762982
94	P02454	GSP(15.9949)GEAGRP(15.9949)GEAGLP(15.9949)GAK	5	2	0	0.030585	0.386577	0.0558	0.7913	47	0.000394	0.001085	-0.64775
95	P02454	GFSGLQGPP(15.9949)GSP(15.9949)GSPGEQGPSGASGPAGPR	4	3	0	0.026838	0.220881	0.0558	0.7913	76	0.002408	0.002491	-0.471322
96	P02454	NGDRGETGPAGPAGPIGPAGAR	11	3	0	0.037954	0.342538	0.0558	0.7913	57	0.004529	0.00257	0.423963
97	P02454	GEPGPSGLP(15.9949)GPP(15.9949)GER	7	2	0	0.017472	0.437205	0.0558	0.7913	38	0.000287	0.00055	-0.387709
98	P02454	GETGPAGPAGPIGPAGAR	7	2	0	0.011033	0.428106	0.0558	0.7913	47	0.001813	0.000517	0.704648
99	P02454	GSPGADGP(15.9949)AGSP(15.9949)GTPGPQGIAGQR	9	3	0	0.016206	0.306823	0.0558	0.7913	61	0.001309	0.000754	0.338945
100	P02454	GFP(15.9949)GLP(15.9949)GPSGEP(15.9949)GKQGPSGASGER	4	3	0	0.022954	0.270565	0.0558	0.7913	58	0.025586	0.010344	0.825348
101	P02454	GDTGPAGPKGEP(15.9949)GSP(15.9949)GENGAP(15.9949)GQMGPR	4	3	0	0.020221	0.234272	0.0558	0.7913	66	0.001508	0.001894	0.203343
102	P02454	GVP(15.9949)GPPGAVGPAGK	6	2	0	0.022198	0.501706	0.0558	0.7913	30	0.002705	0.000879	0.646073
103	P02454	GDRGETGPAGPP(15.9949)GAPGAPGAP(15.9949)GPVGPAGK	5	3	0	0.014488	0.243301	0.0558	0.7913	72	0.00166	0.004805	0.080339
104	P02454	VGPP(15.9949)GPSGNAGPP(15.9949)GPP(15.9949)GPVGK	6	2	0	0.017354	0.333576	0.0558	0.7913	45	0.000401	0.000656	-0.59332
105	P02454	GEP(15.9949)GPSGLP(15.9949)GPP(15.9949)GER	10	2	0	0.025262	0.42691	0.0558	0.7913	38	0.000851	0.000723	-0.230752
106	P02454	GSPGADGPAGSP(15.9949)GTP(15.9949)GPQGIAGQR	6	2	0	0.01857	0.306823	0.0558	0.7913	61	0.001279	0.000988	0.219574
107	P02454	GFSGLQGP(15.9949)PGSP(15.9949)GSP(15.9949)GEQGPSGASGPAGPR	8	3	0	0.021948	0.21568	0.0558	0.7913	76	0.000638	0.00138	-0.461415
108	P02454	DGLNGLP(15.9949)GPIGP(15.9949)P(15.9949)GPR	7	2	0	0.073812	0.393152	0.0558	0.7913	33	0.001691	0.003737	-0.50528
109	P02454	GVP(15.9949)GPP(15.9949)GAVGPAGK	10	2	0	0.019247	0.489893	0.0558	0.7913	30	0.000996	0.000536	0.16364
110	P02454	GANGAP(15.9949)GIAGAP(15.9949)GFP(15.9949)GAR	6	3	0	0.144028	0.390279	0.0558	0.7913	47	0.002148	0.029311	-0.209892
111	P02454	GSPGADGPAGSP(15.9949)GTPGPQGIAGQR	7	3	0	0.008198	0.314222	0.0558	0.7913	61	0.002454	0.000387	0.831011
112	P02454	GEPGPAGVQGPP(15.9949)GPAGEEGKR	6	3	0	0.012876	0.334452	0.0558	0.7913	56	0.002553	0.000754	0.72901
113	P02454	DGLNGLP(15.9949)GPIGPP(15.9949)GP(15.9949)R	9	2	0	0.049257	0.393152	0.0558	0.7913	33	0.001706	0.002762	-0.051871
114	P02454	GLTGSP(15.9949)GSPGPDGK	9	2	0	0.017486	0.501278	0.0558	0.7913	27	0.001477	0.000595	0.311383
115	P02454	GNDGAVGAAGPP(15.9949)GPTGPTGPP(15.9949)GFP(15.9949)GAAGAK	6	3	0	0.014837	0.227582	0.0558	0.7913	68	0.000104	0.000741	-1.33676
116	P02454	GLTGSP(15.9949)GSP(15.9949)GPDGK	7	2	0	0.020637	0.489475	0.0558	0.7913	27	0.000859	0.000679	0.170429
117	P02454	GDRGETGPAGPP(15.9949)GAP(15.9949)GAPGAP(15.9949)GPVGPAGK	5	3	0	0.019307	0.237572	0.0558	0.7913	72	0.003186	0.006506	-0.301774
118	P02454	GPPGP(15.9949)M(15.9949)GPPGLAGPP(15.9949)GESGR	5	3	0	0.036601	0.327659	0.0558	0.7913	48	0.001477	0.001931	0.035427
119	P02454	GFSGLQGPP(15.9949)GSP(15.9949)GSP(15.9949)GEQGPSGASGPAGPR	5	3	0	0.008469	0.21568	0.0558	0.7913	76	0.000783	0.000532	0.236544
120	P02454	VGP(15.9949)PGPSGNAGPP(15.9949)GPP(15.9949)GPVGK	6	3	0	0.016727	0.333576	0.0558	0.7913	45	0.00031	0.000615	-0.78597
121	P02454	DGEAGAQGAP(15.9949)GPAGPAGER	8	3	0	0.01778	0.401085	0.0558	0.7913	57	0.000569	0.000714	0.107016
122	P02454	GEP(15.9949)GPAGVQGPP(15.9949)GPAGEEGK	5	2	0	0.011811	0.354986	0.0558	0.7913	52	0.001813	0.002123	0.149326
123	P02454	GSP(15.9949)GEAGRP(15.9949)GEAGLP(15.9949)GAK	8	3	0	0.024681	0.386577	0.0558	0.7913	47	0.000806	0.000775	-0.165343
124	P02454	GSP(15.9949)GADGPAGSP(15.9949)GTPGPQGIAGQR	8	2	0	0.009941	0.306823	0.0558	0.7913	61	0.001035	0.000485	0.349615
125	P02454	GETGPAGRP(15.9949)GEVGPP(15.9949)GPP(15.9949)GPAGEK	8	3	0	0.016749	0.278295	0.0558	0.7913	59	2.7e-05	0.000666	-1.55319
126	P02454	GFSGLDGAK	7	2	0	0.009097	0.620705	0.0558	0.7913	16	0.0015	0.000395	0.793993
127	P02454	GDRGETGPAGPP(15.9949)GAP(15.9949)GAP(15.9949)GAPGPVGPAGK	4	3	0	0.010702	0.237572	0.0558	0.7913	72	0.004453	0.000919	0.886944
128	P02454	GFSGLQGP(15.9949)PGSP(15.9949)GSP(15.9949)GEQGPSGASGPAGPR	4	2	0	0.016705	0.21568	0.0558	0.7913	76	0.001141	0.001198	0.138207
129	P02454	GQAGVM(15.9949)GFP(15.9949)GPK	10	2	0	0.025035	0.473529	0.0558	0.7913	24	0.000363	0.000734	-0.951175
130	P70623	LGVEFDEITPDDR	6	2	0	0.014497	0.432921	0.0558	0.7913	24	0.130811	0.019021	0.984488
131	P09650	ATCGGFLVTR	6	2	0	0.027498	0.53988	0.0558	0.7913	15	0.010022	0.008108	0.33527
132	P05539	GAQGPP(15.9949)GATGFP(15.9949)GAAGR	9	2	0	0.016342	0.419306	0.0558	0.7913	44	0.001187	0.000506	0.413764
133	P31000	FADLSEAANR	8	2	0	0.015662	0.548457	0.0558	0.7913	27	0.076062	0.008011	0.973875
134	P31000	QDVDNASLAR	9	2	0	0.028891	0.563543	0.0558	0.7913	25	0.084058	0.016608	0.956249
135	P31000	EEAESTLQSFR	4	2	0	0.021622	0.49425	0.0558	0.7913	30	0.113843	0.02039	0.981587
136	contaminant_KERATIN22	GGSGGGGSISGGGYGSGGGSGGR	6	2	0	0.060444	0.407856	0.0558	0.7913	49	0.004086	0.003483	-0.049628
137	contaminant_KERATIN22	STSSFSCLSR	7	2	0	0.05234	0.540706	0.0558	0.7913	19	0.00369	0.002937	-0.326534
138	Q07936	AEDGSVIDYELIDQDAR	4	2	0	0.010854	0.353274	0.0558	0.7913	39	0.05592	0.00592	0.983309
139	Q07936	QDIAFAYQR	4	2	0	0.202848	0.527227	0.0558	0.7913	23	0.037305	0.132714	-0.575219
140	Q07936	TNQELQEINR	7	2	0	0.021228	0.515283	0.0558	0.7913	25	0.063062	0.010247	0.955354
141	P02091	VNPDDVGGEALGR	11	2	0	0.021757	0.497279	0.0558	0.7913	28	0.03111	0.006198	0.976354
142	P62804	DNIQGITKPAIR	5	3	0	0.027178	0.477417	0.0558	0.7913	24	0.031079	0.00965	0.86236
143	P02770	TNCELYEK	9	2	0	0.027648	0.554086	0.0558	0.7913	13	0.244824	0.068185	0.948508
144	P02770	CCSGSLVER	7	2	0	0.008583	0.561176	0.0558	0.7913	19	0.20686	0.014531	0.99587
145	P02770	LGEYGFQNAVLVR	6	2	0	0.006614	0.426408	0.0558	0.7913	24	0.230908	0.015005	0.997318
146	P02770	AADKDNCFATEGPNLVAR	6	3	0	0.441591	0.339725	0.0558	0.7913	39	0.023389	0.146454	-0.070911
147	P02770	YMCENQATISSK	5	2	0	0.013533	0.437526	0.0558	0.7913	24	0.253857	0.035232	0.990073
148	P02770	YM(15.9949)CENQATISSK	8	2	0	0.024081	0.427224	0.0558	0.7913	24	0.218213	0.044806	0.973694
149	P02770	LRDNYGELADCCAK	4	3	0	0.067691	0.392767	0.0558	0.7913	29	0.133496	0.120846	0.684066
150	P02770	DNYGELADCCAK	10	2	0	0.022735	0.458998	0.0558	0.7913	24	0.220898	0.043608	0.977487
151	P02770	LVQEVTDFAK	8	2	0	0.011264	0.517018	0.0558	0.7913	17	0.223096	0.023794	0.992063
152	P02770	CCTLPEAQR	5	2	0	0.01118	0.534924	0.0558	0.7913	22	0.222119	0.021097	0.994606
153	P02770	FPNAEFAEITK	5	2	0	0.017348	0.475611	0.0558	0.7913	23	0.189404	0.039041	0.986465
154	P02770	YNEVLTQCCTESDK	7	2	0	0.016443	0.38333	0.0558	0.7913	24	0.244824	0.043537	0.981751
155	P02770	TCVADENAENCDK	7	2	0	0.03067	0.446358	0.0558	0.7913	28	0.299023	0.087695	0.966113
156	P02770	APQVSTPTLVEAAR	11	2	0	0.015632	0.448512	0.0558	0.7913	33	0.2104	0.024062	0.98762
157	contaminant_KERATIN03	GSLGGGFSSGGFSGGSFSR	6	2	0	0.007025	0.386714	0.0558	0.7913	37	8.1e-05	0.000371	0.013666
158	contaminant_KERATIN03	SLLEGEGSSGGGGR	9	2	0	0.042443	0.518537	0.0558	0.7913	33	0.000195	0.00156	-0.185461
159	contaminant_KERATIN02	QGVDADINGLR	7	2	0	0.045219	0.537179	0.0558	0.7913	23	0.002484	0.002227	0.341375

## Sheet: hl-data
ID	t	A0	m0	m1	m2	m3	m4	m5	notFoundBySE
0	0	0.564777	0.564777	0.308229	0.100588	0.026406	0	0
0	0	0.562598	0.562598	0.309916	0.102261	0.025225	0	0
0	3	0.554414	0.554414	0.318649	0.102107	0.02483	0	0
0	6	0.560648	0.560648	0.308818	0.102909	0.027624	0	0
0	6	0.552368	0.552368	0.314894	0.106515	0.026223	0	0
0	15	0.540531	0.540531	0.314781	0.105929	0.03038	0.008378	0
0	15	0.541129	0.541129	0.308728	0.114319	0.03066	0.005164	0
0	63	0.516156	0.516156	0.304374	0.124413	0.043391	0.011665	0
1	0	0.429846	0.429846	0.330598	0.159009	0.063377	0.017169	0
1	0	0.442684	0.442684	0.33823	0.1564	0.050244	0.012442	0
1	3	0.426894	0.426894	0.377448	0.156391	0.031635	0.007632	0
1	3	0.458434	0.458434	0.346617	0.155097	0.034719	0.005132	0
1	3	0.438555	0.438555	0.3468	0.150915	0.051181	0.012548	0
1	6	0.442464	0.442464	0.340768	0.153269	0.050204	0.013295	0
1	6	0.444084	0.444084	0.341993	0.149234	0.051625	0.013064	0
1	15	0.430187	0.430187	0.340927	0.150115	0.057646	0.021125	0
1	15	0.428817	0.428817	0.334829	0.155985	0.059087	0.021282	0
1	63	0.401376	0.401376	0.32036	0.167161	0.070958	0.027983	0.012161
1	63	0.394567	0.394567	0.324094	0.170046	0.0739	0.029218	0.008176
2	0	0.418973	0.418973	0.255668	0.182399	0.091784	0.040284	0.010892
2	0	0.518391	0.518391	0.331543	0.116418	0.031053	0.002596	0
2	3	0.511248	0.511248	0.328161	0.122241	0.031738	0.006611	0
2	15	0.483311	0.483311	0.311119	0.151667	0.047335	0.006568	0
2	15	0.488537	0.488537	0.330465	0.132193	0.039624	0.009182	0
2	63	0.47231	0.47231	0.32211	0.126129	0.02471	0.03152	0.02322
3	0	0.640931	0.640931	0.279659	0.06661	0.0128	0	0
3	0	0.64154	0.64154	0.27165	0.074653	0.012157	0	0
3	3	0.641055	0.641055	0.278892	0.074343	0.00571	0	0
3	6	0.637	0.637	0.283852	0.073436	0.005712	0	0
3	6	0.653494	0.653494	0.261256	0.073917	0.011333	0	0
3	15	0.615864	0.615864	0.281749	0.083931	0.018457	0	0
3	63	0.600224	0.600224	0.293317	0.090883	0.015576	0	0
3	63	0.602757	0.602757	0.289069	0.093154	0.01502	0	0
4	3	0.383786	0.383786	0.329698	0.174849	0.07556	0.028834	0.007273
4	6	0.374505	0.374505	0.321932	0.192836	0.074227	0.032162	0.004338
4	15	0.298171	0.298171	0.336078	0.210166	0.108694	0.036089	0.010802
4	15	0.357298	0.357298	0.32529	0.191535	0.079806	0.033087	0.012984
4	63	0.344769	0.344769	0.318465	0.199883	0.085166	0.037569	0.014149
5	0	0.393638	0.393638	0.345344	0.178632	0.064341	0.018044	0
5	0	0.391421	0.391421	0.347607	0.180087	0.06258	0.018304	0
5	3	0.265711	0.265711	0.378903	0.224686	0.106749	0.023951	0
5	3	0.342908	0.342908	0.3541	0.199644	0.080838	0.019731	0.002778
5	3	0.392141	0.392141	0.345741	0.172202	0.06534	0.019846	0.00473
5	6	0.392305	0.392305	0.342112	0.178537	0.062865	0.01971	0.004472
5	6	0.384675	0.384675	0.340734	0.179224	0.067808	0.020957	0.006602
5	15	0.37189	0.37189	0.329119	0.182055	0.075406	0.031113	0.010418
5	15	0.373376	0.373376	0.33129	0.181392	0.074378	0.027715	0.011849
5	63	0.340533	0.340533	0.317451	0.187336	0.085538	0.042235	0.018792
5	63	0.360603	0.360603	0.305112	0.189671	0.086398	0.040702	0.017513
6	0	0.491196	0.491196	0.334576	0.130006	0.036104	0.008118	0
6	0	0.490165	0.490165	0.341802	0.127104	0.034098	0.00683	0
6	3	0.493096	0.493096	0.334053	0.129477	0.038334	0.005039	0
6	3	0.49023	0.49023	0.331958	0.132229	0.03693	0.008653	0
6	6	0.482334	0.482334	0.335231	0.13361	0.039659	0.009166	0
6	6	0.484327	0.484327	0.330369	0.134195	0.041415	0.009695	0
6	15	0.474535	0.474535	0.329496	0.140082	0.043782	0.012105	0
6	15	0.468502	0.468502	0.332801	0.137956	0.046533	0.014208	0
6	63	0.433291	0.433291	0.322128	0.152908	0.061139	0.022393	0.008141
6	63	0.441124	0.441124	0.32972	0.148952	0.059186	0.021019	0
7	0	0.517336	0.517336	0.312728	0.124718	0.038269	0.00695	0
7	15	0.30004	0.30004	0.203426	0.286527	0.148043	0.0525	0.009464
7	15	0.337413	0.337413	0.231662	0.262857	0.119788	0.041182	0.007098
7	63	0.35862	0.35862	0.273652	0.213443	0.117242	0.033295	0.00375
8	0	0.531519	0.531519	0.326824	0.118507	0.02315	0	0
8	0	0.53269	0.53269	0.339429	0.109248	0.018633	0	0
8	3	0.593021	0.593021	0.272683	0.134296	0	0	0
8	3	0.522699	0.522699	0.327975	0.124794	0.024532	0	0
8	3	0.508186	0.508186	0.336641	0.116427	0.030935	0.007813	0
8	6	0.512837	0.512837	0.335431	0.117587	0.0334	0.000745	0
8	15	0.500238	0.500238	0.340042	0.129583	0.027752	0.002385	0
8	15	0.489915	0.489915	0.337093	0.124479	0.039596	0.008916	0
9	0	0.196483	0.196483	0.305971	0.256762	0.144694	0.06613	0.023373
9	3	0.192706	0.192706	0.295379	0.252944	0.151694	0.069483	0.028134
9	15	0.189066	0.189066	0.278615	0.246035	0.147751	0.076183	0.035294
9	15	0.182157	0.182157	0.288671	0.246947	0.147596	0.070769	0.035465
9	63	0.172484	0.172484	0.258912	0.228922	0.135784	0.081267	0.048832
10	0	0.364372	0.364372	0.35148	0.186983	0.071154	0.02066	0.00535
10	0	0.378467	0.378467	0.347296	0.181248	0.071075	0.020949	0.000965
10	3	0.362928	0.362928	0.347455	0.189086	0.074778	0.020404	0.005349
10	15	0.352912	0.352912	0.341484	0.190807	0.078181	0.027543	0.009073
10	15	0.350344	0.350344	0.345764	0.188987	0.078796	0.027057	0.009052
10	63	0.326132	0.326132	0.325983	0.192066	0.092779	0.03874	0.017661
11	0	0.482697	0.482697	0.309938	0.116041	0.055393	0.029994	0.005938
11	0	0.505463	0.505463	0.321332	0.116372	0.036982	0.019852	0
11	3	0.53753	0.53753	0.248236	0.089646	0.072075	0.036044	0.016469
11	3	0.521196	0.521196	0.306644	0.128834	0.030987	0.012339	0
11	6	0.48949	0.48949	0.339444	0.111312	0.035597	0.024156	0
11	15	0.48961	0.48961	0.310531	0.124129	0.044525	0.025641	0.005563
11	15	0.469016	0.469016	0.316064	0.118703	0.051219	0.02787	0.017129
12	0	0.333438	0.333438	0.35356	0.207383	0.081254	0.022041	0.002324
12	3	0.365905	0.365905	0.386303	0.191639	0.031917	0.02099	0.003246
12	6	0.301156	0.301156	0.327112	0.283144	0.075488	0.013101	0
12	15	0.298136	0.298136	0.330167	0.211018	0.091275	0.027891	0.04011
13	0	0.437242	0.437242	0.348247	0.155031	0.048312	0.011169	0
13	0	0.43106	0.43106	0.357349	0.152272	0.051512	0.007806	0
13	3	0.445647	0.445647	0.350573	0.153149	0.047095	0.003535	0
13	3	0.436451	0.436451	0.345225	0.153229	0.050919	0.014177	0
13	15	0.424933	0.424933	0.339653	0.158321	0.059359	0.017734	0
13	15	0.415269	0.415269	0.345366	0.160014	0.060826	0.018525	0
13	63	0.387256	0.387256	0.323862	0.176829	0.075114	0.029581	0.007359
14	0	0.435369	0.435369	0.338709	0.182608	0.039435	0.00388	0
14	0	0.405369	0.405369	0.354258	0.165371	0.057026	0.017976	0
14	3	0.403894	0.403894	0.358606	0.166927	0.057671	0.012903	0
14	6	0.43439	0.43439	0.338825	0.181335	0.04517	0.000279	0
14	15	0.405941	0.405941	0.341985	0.175266	0.058823	0.017985	0
14	15	0.401096	0.401096	0.338568	0.16306	0.065361	0.020721	0.011193
14	63	0.379187	0.379187	0.330773	0.176688	0.075919	0.030408	0.007025
15	0	0.423557	0.423557	0.344179	0.162446	0.054855	0.014962	0
15	3	0.425974	0.425974	0.344286	0.164549	0.056489	0.008702	0
15	6	0.419559	0.419559	0.344188	0.16289	0.057194	0.016169	0
15	15	0.397871	0.397871	0.33699	0.166202	0.066096	0.023825	0.009015
15	63	0.371709	0.371709	0.318865	0.174187	0.080554	0.037166	0.017518
15	63	0.367825	0.367825	0.324903	0.174883	0.080114	0.037329	0.014946
16	0	0.466624	0.466624	0.341681	0.140118	0.041447	0.01013	0
16	0	0.468901	0.468901	0.341537	0.136859	0.039725	0.012977	0
16	3	0.471128	0.471128	0.338829	0.140048	0.044221	0.005773	0
16	3	0.469573	0.469573	0.343418	0.131473	0.04454	0.010996	0
16	6	0.486267	0.486267	0.33091	0.133213	0.041079	0.008532	0
16	15	0.448084	0.448084	0.331665	0.161856	0.050795	0.007601	0
16	63	0.444122	0.444122	0.334927	0.150899	0.055588	0.014463	0
17	0	0.324854	0.324854	0.35708	0.19742	0.086386	0.027601	0.00666
17	3	0.306384	0.306384	0.366221	0.205867	0.07765	0.030943	0.012935
17	6	0.33269	0.33269	0.343326	0.224818	0.068427	0.019831	0.010907
17	15	0.307125	0.307125	0.33558	0.200597	0.097596	0.033111	0.019968
17	15	0.301125	0.301125	0.336641	0.206747	0.099416	0.039316	0.016754
18	0	0.449577	0.449577	0.344854	0.150615	0.045373	0.00958	0
18	0	0.443748	0.443748	0.357928	0.146484	0.04403	0.00781	0
18	3	0.43535	0.43535	0.355536	0.143882	0.05317	0.012062	0
18	6	0.442742	0.442742	0.352659	0.146297	0.051225	0.007077	0
18	6	0.457	0.457	0.331888	0.151398	0.043789	0.015926	0
18	15	0.341056	0.341056	0.252876	0.116154	0.041735	0.017154	0.117818
18	15	0.437165	0.437165	0.331095	0.152303	0.057599	0.021839	0
18	63	0.381693	0.381693	0.303217	0.154128	0.074091	0.033681	0.049656
18	63	0.405918	0.405918	0.313045	0.172401	0.076587	0.024918	0.00713
19	0	0.598973	0.598973	0.296177	0.086132	0.018717	0	0
19	0	0.592234	0.592234	0.303	0.086038	0.018728	0	0
19	3	0.591929	0.591929	0.2996	0.093386	0.015085	0	0
19	3	0.606717	0.606717	0.297147	0.08506	0.011076	0	0
19	3	0.587284	0.587284	0.302745	0.089461	0.020511	0	0
19	6	0.591742	0.591742	0.298907	0.089323	0.020029	0	0
19	6	0.585162	0.585162	0.303823	0.088187	0.022829	0	0
19	15	0.580022	0.580022	0.301111	0.096394	0.022473	0	0
19	15	0.579682	0.579682	0.298978	0.096673	0.024667	0	0
19	63	0.547223	0.547223	0.303554	0.109609	0.031903	0.007711	0
19	63	0.544594	0.544594	0.308011	0.108799	0.032062	0.006535	0
20	0	0.41865	0.41865	0.345135	0.165312	0.055763	0.01514	0
20	3	0.421067	0.421067	0.348742	0.16189	0.055879	0.012422	0
20	3	0.411696	0.411696	0.35116	0.164123	0.05767	0.015351	0
20	6	0.416089	0.416089	0.346665	0.164783	0.056536	0.015926	0
20	6	0.411067	0.411067	0.347512	0.163889	0.061269	0.016263	0
20	15	0.398894	0.398894	0.339506	0.170486	0.063837	0.020777	0.0065
20	15	0.392171	0.392171	0.340497	0.169585	0.066888	0.023079	0.00778
20	63	0.366576	0.366576	0.327984	0.177531	0.080337	0.033814	0.013758
20	63	0.379213	0.379213	0.326954	0.173596	0.077414	0.032387	0.010436
21	0	0.394222	0.394222	0.330856	0.130192	0.089138	0.037367	0.018224
21	0	0.38442	0.38442	0.30721	0.201228	0.052209	0.020238	0.032207
21	3	0.303791	0.303791	0.322813	0.255416	0.051708	0.023721	0.042551
21	6	0.371601	0.371601	0.351194	0.198014	0.06194	0.01725	0
21	15	0.342978	0.342978	0.316075	0.146708	0.112756	0.054523	0.020959
21	15	0.360776	0.360776	0.335154	0.174422	0.084855	0.035661	0.009132
21	63	0.300914	0.300914	0.30223	0.179223	0.112074	0.076585	0.019577
22	0	0.426607	0.426607	0.331156	0.164011	0.060822	0.017404	0
22	15	0.411547	0.411547	0.331911	0.165373	0.064807	0.025487	0.000874
22	15	0.401646	0.401646	0.324813	0.170288	0.070365	0.02468	0.008208
22	63	0.382625	0.382625	0.312547	0.180068	0.077719	0.032512	0.014529
23	0	0.223709	0.223709	0.303787	0.240611	0.139866	0.066716	0.021725
23	0	0.220436	0.220436	0.284388	0.252301	0.149424	0.067131	0.02632
23	6	0.204676	0.204676	0.305735	0.246684	0.136532	0.070735	0.024306
23	15	0.197466	0.197466	0.289106	0.239451	0.143318	0.073599	0.033853
23	15	0.182157	0.182157	0.288671	0.246947	0.147596	0.070769	0.035465
23	63	0.172484	0.172484	0.258912	0.228922	0.135784	0.081267	0.048832
24	0	0.23628	0.23628	0.320926	0.239284	0.130236	0.05348	0.017828
24	6	0.230932	0.230932	0.317942	0.235207	0.131494	0.057711	0.019512
24	6	0.229936	0.229936	0.320878	0.23989	0.125567	0.054615	0.021957
24	15	0.218561	0.218561	0.302596	0.237013	0.134475	0.062354	0.030307
24	15	0.211903	0.211903	0.297577	0.227752	0.129853	0.059725	0.028238
24	63	0.1989	0.1989	0.269602	0.212786	0.128185	0.070863	0.040727
25	0	0.422351	0.422351	0.358329	0.153798	0.052774	0.012748	0
25	0	0.424125	0.424125	0.348065	0.15603	0.057176	0.014604	0
25	3	0.416514	0.416514	0.349766	0.163673	0.054918	0.015129	0
25	6	0.427624	0.427624	0.338597	0.164437	0.054012	0.01533	0
25	6	0.422491	0.422491	0.341918	0.162094	0.057269	0.016228	0
25	15	0.398975	0.398975	0.34149	0.171442	0.061691	0.021196	0.005206
25	15	0.404254	0.404254	0.33465	0.166829	0.063947	0.022217	0.008104
25	63	0.368283	0.368283	0.326631	0.176613	0.078179	0.035845	0.01445
26	0	0.131765	0.131765	0.27315	0.280257	0.188691	0.079947	0.024148
26	3	0.259675	0.259675	0.321023	0.236307	0.107441	0.047126	0.016622
26	15	0.158847	0.158847	0.28659	0.284601	0.150861	0.079749	0.028656
26	15	0.232585	0.232585	0.314615	0.239697	0.126932	0.05767	0.022544
26	63	0.213147	0.213147	0.313765	0.249833	0.128263	0.056956	0.026088
27	0	0.423557	0.423557	0.344179	0.162446	0.054855	0.014962	0
27	0	0.422005	0.422005	0.346327	0.16207	0.055435	0.014163	0
27	3	0.425974	0.425974	0.344286	0.164549	0.056489	0.008702	0
27	3	0.420072	0.420072	0.347181	0.160929	0.05616	0.015657	0
27	6	0.419559	0.419559	0.344188	0.16289	0.057194	0.016169	0
27	6	0.420588	0.420588	0.341859	0.161717	0.057636	0.0182	0
27	15	0.398817	0.398817	0.338641	0.167765	0.064531	0.022784	0.007462
27	15	0.397871	0.397871	0.33699	0.166202	0.066096	0.023825	0.009015
27	63	0.371709	0.371709	0.318865	0.174187	0.080554	0.037166	0.017518
27	63	0.367825	0.367825	0.324903	0.174883	0.080114	0.037329	0.014946
28	0	0.521748	0.521748	0.327655	0.117793	0.027949	0.004855	0
28	3	0.514526	0.514526	0.330159	0.120294	0.030854	0.004167	0
28	15	0.493223	0.493223	0.337598	0.125994	0.03626	0.006924	0
28	15	0.479409	0.479409	0.334693	0.133907	0.039762	0.01223	0
28	63	0.478021	0.478021	0.31951	0.141242	0.04426	0.016967	0
29	0	0.41865	0.41865	0.345135	0.165312	0.055763	0.01514	0
29	3	0.421067	0.421067	0.348742	0.16189	0.055879	0.012422	0
29	6	0.411067	0.411067	0.347512	0.163889	0.061269	0.016263	0
29	15	0.398894	0.398894	0.339506	0.170486	0.063837	0.020777	0.0065
29	15	0.392171	0.392171	0.340497	0.169585	0.066888	0.023079	0.00778
29	63	0.366576	0.366576	0.327984	0.177531	0.080337	0.033814	0.013758
29	63	0.379213	0.379213	0.326954	0.173596	0.077414	0.032387	0.010436
30	0	0.220776	0.220776	0.337077	0.236093	0.130579	0.055927	0.018002
30	3	0.225303	0.225303	0.318824	0.241606	0.127948	0.057778	0.021435
30	15	0.218561	0.218561	0.302596	0.237013	0.134475	0.062354	0.030307
30	15	0.211903	0.211903	0.297577	0.227752	0.129853	0.059725	0.028238
30	63	0.1989	0.1989	0.269602	0.212786	0.128185	0.070863	0.040727
31	0	0.569916	0.569916	0.291856	0.137189	0.001039	0	0
31	3	0.482123	0.482123	0.33155	0.145241	0.036088	0.004997	0
31	15	0.508091	0.508091	0.356136	0.12006	0.015713	0	0
31	15	0.478269	0.478269	0.33525	0.131793	0.045652	0.009036	0
32	0	0.444253	0.444253	0.341976	0.157063	0.0374	0.019308	0
32	0	0.437581	0.437581	0.363937	0.14087	0.050509	0.007103	0
32	3	0.433374	0.433374	0.341837	0.163872	0.053025	0.007892	0
32	6	0.425336	0.425336	0.353814	0.155524	0.052693	0.012633	0
32	15	0.414259	0.414259	0.339382	0.157507	0.069187	0.019665	0
32	15	0.408331	0.408331	0.338638	0.161854	0.065014	0.020425	0.005739
32	63	0.388578	0.388578	0.321664	0.175052	0.07436	0.031075	0.009271
33	0	0.426469	0.426469	0.332444	0.162861	0.060782	0.017444	0
33	0	0.423224	0.423224	0.331221	0.165523	0.061137	0.018894	0
33	3	0.437231	0.437231	0.351073	0.153828	0.049737	0.00813	0
33	15	0.403633	0.403633	0.330478	0.170438	0.066742	0.021896	0.006813
33	15	0.40046	0.40046	0.322144	0.17224	0.071993	0.025311	0.007852
33	63	0.37259	0.37259	0.314639	0.18044	0.08385	0.034688	0.013793
33	63	0.373457	0.373457	0.315105	0.178874	0.084522	0.034418	0.013624
34	0	0.507598	0.507598	0.328912	0.122121	0.033884	0.007485	0
34	0	0.507942	0.507942	0.32866	0.123211	0.033491	0.006697	0
34	3	0.497722	0.497722	0.319676	0.120961	0.044597	0.017044	0
34	3	0.503524	0.503524	0.329528	0.125662	0.033496	0.00779	0
34	6	0.504579	0.504579	0.327622	0.125408	0.034586	0.007806	0
34	6	0.502479	0.502479	0.329665	0.124374	0.035836	0.007646	0
34	15	0.490362	0.490362	0.328765	0.131238	0.04016	0.009476	0
34	15	0.489486	0.489486	0.325151	0.133208	0.040799	0.011356	0
34	63	0.457826	0.457826	0.323624	0.146416	0.053532	0.018602	0
34	63	0.454332	0.454332	0.328139	0.147199	0.053221	0.017109	0
35	0	0.281541	0.281541	0.341077	0.222307	0.108479	0.036834	0.009763
35	0	0.307733	0.307733	0.334165	0.222218	0.11972	0.016164	0
35	3	0.326633	0.326633	0.298976	0.235682	0.116744	0.021965	0
35	3	0.278557	0.278557	0.333632	0.225739	0.112827	0.040238	0.009007
35	3	0.270383	0.270383	0.348764	0.222379	0.10446	0.041719	0.012296
35	6	0.272504	0.272504	0.345589	0.224945	0.109914	0.038406	0.008642
35	6	0.266912	0.266912	0.348394	0.221671	0.114391	0.037751	0.010881
35	15	0.263738	0.263738	0.336083	0.222703	0.11218	0.049478	0.015819
35	15	0.257198	0.257198	0.326609	0.222859	0.114746	0.047712	0.022109
35	63	0.240368	0.240368	0.310074	0.223399	0.123354	0.058962	0.029971
36	0	0.521054	0.521054	0.321768	0.116739	0.033651	0.006788	0
36	0	0.524816	0.524816	0.32322	0.116931	0.029049	0.005985	0
36	3	0.52757	0.52757	0.323052	0.11969	0.02676	0.002927	0
36	3	0.519652	0.519652	0.324535	0.119161	0.030292	0.006361	0
36	6	0.52101	0.52101	0.324803	0.116407	0.031127	0.006653	0
36	6	0.51628	0.51628	0.328379	0.116556	0.031431	0.007354	0
36	15	0.506626	0.506626	0.324108	0.123995	0.03617	0.009101	0
36	15	0.50434	0.50434	0.326766	0.1228	0.036718	0.009376	0
36	63	0.477741	0.477741	0.324646	0.136171	0.047017	0.014425	0
36	63	0.480125	0.480125	0.321677	0.136681	0.046958	0.014558	0
37	0	0.320833	0.320833	0.353897	0.207016	0.084604	0.027072	0.006579
37	3	0.318425	0.318425	0.369274	0.198674	0.087839	0.025805	-1.6e-05
37	6	0.341071	0.341071	0.359404	0.204263	0.073417	0.019321	0.002523
37	15	0.303126	0.303126	0.338977	0.200056	0.096382	0.055314	0.006145
37	15	0.299189	0.299189	0.338901	0.20777	0.094705	0.045446	0.013988
38	0	0.422577	0.422577	0.260058	0.09017	0.026249	0.025863	0.098414
38	0	0.521999	0.521999	0.326981	0.114474	0.030612	0.005934	0
38	3	0.526097	0.526097	0.324003	0.113032	0.026651	0.010217	0
38	3	0.522912	0.522912	0.322748	0.11476	0.031831	0.007749	0
38	6	0.515718	0.515718	0.322395	0.118394	0.032177	0.011317	0
38	15	0.471686	0.471686	0.300507	0.113009	0.034446	0.036119	0.030685
38	15	0.508713	0.508713	0.32005	0.119503	0.039631	0.012103	0
38	63	0.472899	0.472899	0.321601	0.138322	0.050455	0.016723	0
38	63	0.48487	0.48487	0.316181	0.140548	0.046883	0.011519	0
39	0	0.473758	0.473758	0.225048	0.066913	0.145797	0.068404	0.02008
39	3	0.591793	0.591793	0.296357	0.089115	0.022735	0	0
39	15	0.558041	0.558041	0.286548	0.087774	0.046967	0.020671	0
39	15	0.568992	0.568992	0.29284	0.094809	0.032792	0.010567	0
39	63	0.544505	0.544505	0.306359	0.105427	0.035932	0.007776	0
40	0	0.327265	0.327265	0.344554	0.207364	0.085883	0.028924	0.006011
40	0	0.325217	0.325217	0.33876	0.213293	0.085472	0.030978	0.006279
40	3	0.310249	0.310249	0.34922	0.206668	0.094003	0.031669	0.008191
40	6	0.303179	0.303179	0.377244	0.197588	0.088251	0.028287	0.005449
40	15	0.311085	0.311085	0.34841	0.206978	0.087378	0.035993	0.010156
40	15	0.306419	0.306419	0.330021	0.208149	0.091979	0.035737	0.01791
40	63	0.281175	0.281175	0.318494	0.204336	0.105723	0.050959	0.026195
41	0	0.437558	0.437558	0.345149	0.155373	0.049157	0.012763	0
41	0	0.425461	0.425461	0.352502	0.15614	0.050925	0.014972	0
41	3	0.473836	0.473836	0.344491	0.1427	0.03164	0.007332	0
41	3	0.438291	0.438291	0.345257	0.154364	0.050602	0.011485	0
41	3	0.433297	0.433297	0.350577	0.154279	0.048653	0.013194	0
41	6	0.443319	0.443319	0.339821	0.154747	0.051502	0.010611	0
41	6	0.426346	0.426346	0.353582	0.155525	0.051397	0.013151	0
41	15	0.419297	0.419297	0.341384	0.162513	0.05717	0.019635	0
41	15	0.416512	0.416512	0.343526	0.160658	0.059853	0.019452	0
41	63	0.389071	0.389071	0.329571	0.171654	0.071766	0.027643	0.010294
41	63	0.407924	0.407924	0.335139	0.167224	0.065043	0.020503	0.004167
42	0	0.154763	0.154763	0.310775	0.280292	0.160648	0.067794	0.022829
42	3	0.271519	0.271519	0.343382	0.229828	0.103081	0.039311	0.012878
42	15	0.212663	0.212663	0.31851	0.264344	0.13096	0.055142	0.017306
42	15	0.188159	0.188159	0.312678	0.261223	0.143033	0.065325	0.02346
43	0	0.381089	0.381089	0.343961	0.179877	0.07181	0.021475	0.001787
43	3	0.371518	0.371518	0.341497	0.182181	0.074326	0.023419	0.007059
43	15	0.342333	0.342333	0.334793	0.188079	0.08385	0.038957	0.011988
43	15	0.354607	0.354607	0.326995	0.181697	0.085605	0.035511	0.015585
43	63	0.344213	0.344213	0.31003	0.189668	0.083122	0.038922	0.023291
44	0	0.43845	0.43845	0.399976	0.147429	0.014144	0	0
44	0	0.385708	0.385708	0.392698	0.153482	0.066997	0.001115	0
44	3	0.348287	0.348287	0.358737	0.199589	0.074917	0.018469	0
44	15	0.335933	0.335933	0.330827	0.192298	0.096409	0.036349	0.008184
45	0	0.510421	0.510421	0.3658	0.112577	0.011202	0	0
45	15	0.418101	0.418101	0.348498	0.155706	0.06049	0.017205	0
45	15	0.456972	0.456972	0.32217	0.15452	0.05588	0.010457	0
45	63	0.423812	0.423812	0.332376	0.156792	0.059255	0.021594	0.006171
46	0	0.49596	0.49596	0.331446	0.126742	0.037361	0.008491	0
46	0	0.502613	0.502613	0.330245	0.123967	0.03475	0.008425	0
46	3	0.495728	0.495728	0.326518	0.129716	0.040275	0.007762	0
46	3	0.494874	0.494874	0.324707	0.135537	0.037081	0.007801	0
46	3	0.493716	0.493716	0.331838	0.128523	0.037407	0.008515	0
46	6	0.491407	0.491407	0.327487	0.131303	0.040202	0.009601	0
46	6	0.487198	0.487198	0.33014	0.131809	0.039511	0.011342	0
46	15	0.474079	0.474079	0.325833	0.138626	0.047023	0.014439	0
46	15	0.46989	0.46989	0.323434	0.139984	0.049906	0.016787	0
46	63	0.429944	0.429944	0.319875	0.151847	0.064933	0.025189	0.008212
46	63	0.417937	0.417937	0.315294	0.156182	0.070887	0.029384	0.010316
47	0	0.385491	0.385491	0.226531	0.079053	0.019695	0.148699	0.088887
47	0	0.529626	0.529626	0.322814	0.113147	0.030346	0.004067	0
47	3	0.528108	0.528108	0.323029	0.110094	0.030772	0.007998	0
47	6	0.521826	0.521826	0.319628	0.110047	0.030426	0.018073	0
47	15	0.461927	0.461927	0.292091	0.111338	0.035256	0.052295	0.032998
47	15	0.468915	0.468915	0.292862	0.11701	0.036867	0.044995	0.026996
47	63	0.44225	0.44225	0.289814	0.127966	0.046577	0.050713	0.028654
47	63	0.417402	0.417402	0.270994	0.119254	0.040565	0.072206	0.052718
48	0	0.0623159	0.062316	0.405485	0.327169	0.151807	0.045258	0.007964
48	0	0.478295	0.478295	0.422803	0.088338	0.010564	0	0
48	3	0.00376935	0.003769	0.418192	0.339857	0.162894	0.057619	0.017668
48	15	0.373737	0.373737	0.326064	0.180914	0.077203	0.033891	0.008191
48	15	0.376073	0.376073	0.340075	0.175508	0.070658	0.026873	0.010812
48	63	0.362398	0.362398	0.322256	0.176871	0.082386	0.042543	0.013546
49	0	0.37708	0.37708	0.319334	0.235345	0.05583	0.01241	0
49	3	0.427515	0.427515	0.35171	0.158655	0.050741	0.011379	0
49	3	0.416048	0.416048	0.324582	0.176258	0.069557	0.013555	0
49	3	0.403388	0.403388	0.343547	0.174894	0.060054	0.018118	0
49	6	0.390056	0.390056	0.350419	0.171895	0.063904	0.020594	0.003131
49	15	0.3827	0.3827	0.334146	0.175626	0.072699	0.025831	0.008998
49	15	0.378964	0.378964	0.333084	0.178226	0.072115	0.027357	0.010255
49	63	0.346919	0.346919	0.314839	0.1835	0.089969	0.040827	0.017364
50	0	0.399195	0.399195	0.360746	0.182508	0.042287	0.015264	0
50	3	0.369437	0.369437	0.3313	0.20037	0.083692	0.015201	0
50	6	0.396242	0.396242	0.377621	0.175657	0.0381	0.01238	0
50	15	0.369865	0.369865	0.338618	0.198188	0.071091	0.020613	0.001624
50	63	0.34527	0.34527	0.346868	0.18254	0.085509	0.028831	0.010982
51	0	0.249381	0.249381	0.330462	0.235484	0.121517	0.049907	0.01325
51	0	0.281627	0.281627	0.341951	0.212631	0.103705	0.043535	0.016552
51	3	0.272912	0.272912	0.334147	0.215936	0.102484	0.048798	0.02023
51	6	0.274934	0.274934	0.322199	0.233364	0.117113	0.038142	0.014248
51	6	0.272268	0.272268	0.335004	0.219627	0.108155	0.042722	0.019628
51	15	0.21427	0.21427	0.313149	0.242635	0.129352	0.059294	0.031615
51	15	0.27248	0.27248	0.316173	0.20878	0.119918	0.050245	0.02389
51	63	0.220669	0.220669	0.288896	0.226104	0.129422	0.070109	0.039374
52	0	0.353839	0.353839	0.352015	0.189567	0.075566	0.023188	0.005825
52	0	0.356559	0.356559	0.349672	0.192287	0.069067	0.026522	0.005892
52	15	0.327616	0.327616	0.334468	0.204268	0.085491	0.034944	0.013214
52	15	0.326238	0.326238	0.328225	0.197081	0.091865	0.035585	0.01857
52	63	0.300734	0.300734	0.306149	0.200125	0.106542	0.050861	0.024172
53	0	0.377785	0.377785	0.369337	0.195075	0.047141	0.010662	0
53	0	0.393128	0.393128	0.35328	0.181954	0.060716	0.010922	0
53	15	0.353789	0.353789	0.351178	0.184123	0.07968	0.025546	0.005683
53	15	0.320294	0.320294	0.373186	0.199481	0.093235	0.013804	0
53	63	0.336185	0.336185	0.310226	0.220567	0.091585	0.030155	0.011283
54	0	0.314203	0.314203	0.362885	0.217554	0.084204	0.020076	0.001078
54	3	0.303875	0.303875	0.347264	0.215625	0.091041	0.033023	0.009172
54	15	0.296123	0.296123	0.342088	0.210541	0.102954	0.037627	0.010666
54	15	0.289527	0.289527	0.334516	0.21734	0.105236	0.039701	0.013681
54	63	0.276109	0.276109	0.325684	0.210223	0.121544	0.051483	0.014957
55	0	0.533103	0.533103	0.315531	0.115041	0.030325	0.006001	0
55	0	0.531162	0.531162	0.317599	0.115122	0.030271	0.005845	0
55	3	0.526959	0.526959	0.317037	0.114755	0.035606	0.005642	0
55	3	0.530042	0.530042	0.318651	0.114198	0.031348	0.005762	0
55	6	0.524592	0.524592	0.321982	0.116055	0.030817	0.006555	0
55	6	0.51826	0.51826	0.322769	0.118221	0.033646	0.007104	0
55	15	0.505748	0.505748	0.322374	0.12108	0.04025	0.010548	0
55	15	0.501617	0.501617	0.32008	0.128659	0.038776	0.010867	0
55	63	0.470752	0.470752	0.315176	0.141187	0.054304	0.018581	0
55	63	0.45705	0.45705	0.323293	0.142914	0.05723	0.019513	0
56	0	0.375186	0.375186	0.351084	0.189817	0.073042	0.01087	0
56	0	0.36272	0.36272	0.356388	0.185218	0.068661	0.023359	0.003655
56	3	0.360743	0.360743	0.3438	0.194787	0.071927	0.022636	0.006107
56	6	0.376474	0.376474	0.341231	0.188995	0.070165	0.020157	0.002977
56	15	0.335151	0.335151	0.337472	0.201598	0.087206	0.030356	0.008217
56	15	0.331657	0.331657	0.330842	0.198038	0.08973	0.036516	0.013218
56	63	0.290706	0.290706	0.307965	0.200965	0.111893	0.050842	0.024217
57	0	0.508926	0.508926	0.317317	0.126441	0.039357	0.007959	0
57	6	0.412689	0.412689	0.321942	0.170063	0.078127	0.017178	0
57	15	0.454898	0.454898	0.330137	0.149859	0.052541	0.012565	0
57	15	0.492528	0.492528	0.314592	0.13484	0.045092	0.012947	0
57	63	0.448269	0.448269	0.31826	0.15403	0.05954	0.019901	0
58	0	0.508926	0.508926	0.317317	0.126441	0.039357	0.007959	0
58	15	0.454898	0.454898	0.330137	0.149859	0.052541	0.012565	0
58	15	0.492528	0.492528	0.314592	0.13484	0.045092	0.012947	0
58	63	0.448269	0.448269	0.31826	0.15403	0.05954	0.019901	0
59	0	0.446172	0.446172	0.334166	0.154812	0.048879	0.01597	0
59	0	0.442176	0.442176	0.333741	0.14241	0.066917	0.014755	0
59	3	0.441802	0.441802	0.343366	0.155945	0.046979	0.011908	0
59	6	0.434771	0.434771	0.355604	0.135147	0.064303	0.010175	0
59	15	0.407189	0.407189	0.335474	0.160322	0.066251	0.022566	0.008197
59	15	0.421233	0.421233	0.308946	0.159851	0.066649	0.029998	0.013323
59	63	0.379569	0.379569	0.315888	0.165744	0.087223	0.037943	0.013633
60	0	0.358058	0.358058	0.344277	0.193835	0.076832	0.02054	0.006458
60	0	0.350002	0.350002	0.348416	0.195484	0.077014	0.022682	0.006402
60	3	0.386121	0.386121	0.331536	0.20931	0.055353	0.017679	0
60	3	0.348843	0.348843	0.345685	0.19062	0.080069	0.027209	0.007573
60	6	0.331155	0.331155	0.364739	0.183706	0.088764	0.024801	0.006836
60	6	0.182302	0.182302	0.107446	0.710253	0	0	0
60	15	0.330755	0.330755	0.332895	0.194362	0.089414	0.036134	0.016439
60	15	0.322118	0.322118	0.324659	0.195769	0.090496	0.040399	0.017983
60	63	0.296524	0.296524	0.312567	0.194557	0.100838	0.050908	0.029706
61	0	0.561074	0.561074	0.315376	0.098996	0.024554	0	0
61	0	0.561201	0.561201	0.307758	0.109104	0.021937	0	0
61	3	0.55269	0.55269	0.315162	0.101359	0.028035	0.002755	0
61	6	0.542696	0.542696	0.316725	0.107605	0.0282	0.004774	0
61	15	0.528273	0.528273	0.312192	0.115894	0.038555	0.005085	0
61	15	0.531657	0.531657	0.316863	0.115783	0.02956	0.006137	0
61	63	0.498522	0.498522	0.312817	0.128354	0.050153	0.010154	0
61	63	0.495755	0.495755	0.301596	0.138664	0.051685	0.0123	0
62	0	0.483497	0.483497	0.335351	0.132225	0.039773	0.009154	0
62	3	0.345369	0.345369	0.352328	0.179147	0.067679	0.041806	0.013672
62	3	0.496732	0.496732	0.332798	0.127564	0.037093	0.005813	0
62	15	0.467552	0.467552	0.328986	0.14081	0.046119	0.016532	0
62	15	0.462556	0.462556	0.322843	0.142956	0.053009	0.018636	0
62	63	0.429016	0.429016	0.310641	0.155563	0.065822	0.025688	0.01327
63	3	0.550295	0.550295	0.313782	0.103908	0.02775	0.004265	0
63	15	0.545965	0.545965	0.316711	0.11483	0.022494	0	0
63	15	0.525308	0.525308	0.311969	0.117551	0.036042	0.00913	0
63	63	0.501988	0.501988	0.316751	0.130373	0.042504	0.008384	0
64	0	0.390073	0.390073	0.341847	0.17408	0.069482	0.021191	0.003329
64	15	0.361021	0.361021	0.328104	0.187942	0.087083	0.029847	0.006003
64	15	0.35555	0.35555	0.329526	0.181136	0.086976	0.034542	0.01227
64	63	0.326903	0.326903	0.313699	0.185727	0.097387	0.047085	0.020722
65	0	0.452851	0.452851	0.352807	0.152008	0.038514	0.00382	0
65	6	0.423944	0.423944	0.366794	0.159816	0.047934	0.001511	0
65	15	0.408719	0.408719	0.339033	0.169292	0.063047	0.01991	0
65	15	0.401924	0.401924	0.342319	0.16187	0.064688	0.022364	0.006834
66	0	0.523294	0.523294	0.304666	0.120943	0.042235	0.008862	0
66	0	0.501871	0.501871	0.296522	0.119924	0.075561	0.006122	0
66	3	0.491093	0.491093	0.291482	0.111476	0.102501	0.003449	0
66	3	0.484253	0.484253	0.285476	0.113022	0.109683	0.007566	0
66	15	0.487713	0.487713	0.296081	0.132931	0.072154	0.011122	0
66	15	0.450167	0.450167	0.287155	0.124298	0.12534	0.01304	0
66	63	0.45313	0.45313	0.311371	0.148642	0.066909	0.019948	0
66	63	0.458914	0.458914	0.314931	0.147321	0.061511	0.017323	0
67	0	0.553686	0.553686	0.312064	0.106958	0.027292	0	0
67	0	0.543858	0.543858	0.316621	0.106026	0.027331	0.006163	0
67	15	0.523855	0.523855	0.320049	0.115795	0.032312	0.007989	0
67	15	0.517404	0.517404	0.316957	0.12336	0.032997	0.009281	0
67	63	0.494243	0.494243	0.317188	0.132113	0.04379	0.012665	0
67	63	0.49213	0.49213	0.316786	0.130477	0.047543	0.013065	0
68	0	0.456301	0.456301	0.343707	0.149099	0.026967	0.023926	0
68	0	0.455727	0.455727	0.331842	0.146125	0.062554	0.003751	0
68	3	0.437397	0.437397	0.346873	0.158461	0.049038	0.008231	0
68	15	0.420469	0.420469	0.338271	0.164526	0.058663	0.018071	0
68	15	0.413439	0.413439	0.345887	0.156156	0.055686	0.025004	0.003828
68	63	0.357975	0.357975	0.261508	0.136178	0.081026	0.162727	0.000586
69	0	0.452147	0.452147	0.338106	0.154867	0.04633	0.008551	0
69	3	0.435695	0.435695	0.344727	0.159775	0.046312	0.013491	0
69	6	0.448622	0.448622	0.320105	0.170267	0.052397	0.008609	0
69	15	0.410238	0.410238	0.337864	0.170776	0.063128	0.017994	0
69	15	0.399664	0.399664	0.339496	0.166659	0.066881	0.022281	0.005019
69	63	0.373006	0.373006	0.320383	0.172105	0.079851	0.03983	0.014825
70	0	0.452851	0.452851	0.352807	0.152008	0.038514	0.00382	0
70	0	0.447284	0.447284	0.34526	0.149721	0.047669	0.010067	0
70	3	0.441921	0.441921	0.339024	0.153018	0.051001	0.015036	0
70	6	0.440508	0.440508	0.3307	0.169472	0.047561	0.011759	0
70	15	0.408719	0.408719	0.339033	0.169292	0.063047	0.01991	0
70	15	0.401924	0.401924	0.342319	0.16187	0.064688	0.022364	0.006834
70	63	0.368657	0.368657	0.333946	0.170719	0.083032	0.033543	0.010103
71	0	0.54029	0.54029	0.304275	0.112826	0.031873	0.010736	0
71	0	0.533997	0.533997	0.308976	0.113579	0.030087	0.013361	0
71	3	0.538375	0.538375	0.306962	0.115722	0.032682	0.006259	0
71	3	0.524731	0.524731	0.307328	0.121295	0.030845	0.015801	0
71	15	0.483033	0.483033	0.331992	0.129469	0.033277	0.02223	0
71	15	0.468548	0.468548	0.329712	0.138747	0.04774	0.015253	0
71	63	0.293923	0.293923	0.35329	0.210822	0.09904	0.035318	0.007607
71	63	0.288546	0.288546	0.341161	0.207503	0.081482	0.038204	0.03027
72	0	0.429782	0.429782	0.344284	0.159389	0.051818	0.014727	0
72	3	0.417462	0.417462	0.352832	0.159421	0.056552	0.013734	0
72	3	0.422262	0.422262	0.325629	0.170614	0.057056	0.022298	0.002141
72	15	0.314396	0.314396	0.307518	0.188361	0.112621	0.057156	0.016161
73	0	0.524371	0.524371	0.306743	0.127286	0.034589	0.007012	0
73	3	0.498948	0.498948	0.303093	0.140107	0.046598	0.011253	0
73	6	0.468347	0.468347	0.314472	0.142071	0.058551	0.016559	0
73	6	0.466955	0.466955	0.311864	0.167036	0.048535	0.00561	0
73	63	0.155031	0.155031	0.207934	0.203243	0.131495	0.051308	0.016205
74	0	0.478848	0.478848	0.327585	0.148476	0.03718	0.007911	0
74	0	0.479684	0.479684	0.344741	0.130936	0.037337	0.007301	0
74	3	0.458905	0.458905	0.326766	0.151304	0.047245	0.015779	0
74	6	0.41693	0.41693	0.320825	0.167508	0.06763	0.021047	0.006059
74	15	0.314736	0.314736	0.313097	0.199754	0.117995	0.045003	0.009416
74	15	0.275795	0.275795	0.290722	0.216001	0.126207	0.067475	0.01485
74	63	0.176564	0.176564	0.258233	0.24902	0.174614	0.096243	0.032587
75	0	0.364375	0.364375	0.262192	0.143392	0.091766	0.033934	0.052847
75	0	0.340198	0.340198	0.297099	0.13739	0.127537	0.06473	0.025261
75	3	0.190115	0.190115	0.275129	0.235864	0.166015	0.091561	0.035935
75	6	0.124899	0.124899	0.257475	0.245857	0.197925	0.115733	0.05421
75	6	0.0760889	0.076089	0.175225	0.248106	0.245791	0.144576	0.090281
76	0	0.582104	0.582104	0.320461	0.079686	0.017748	0	0
76	0	0.601124	0.601124	0.298092	0.080345	0.020438	0	0
76	3	0.37844	0.37844	0.363701	0.176514	0.06595	0.015394	0
76	15	0.259805	0.259805	0.351218	0.252021	0.117437	0.01784	0.001679
76	15	0.198137	0.198137	0.355665	0.27903	0.127545	0.035874	0.003749
76	63	0.230203	0.230203	0.346282	0.253705	0.121017	0.041637	0.007157
77	0	0.616804	0.616804	0.28936	0.082295	0.011541	0	0
77	3	0.450551	0.450551	0.348858	0.148799	0.048035	0.003757	0
77	6	0.343208	0.343208	0.351069	0.216589	0.080644	0.00849	0
77	15	0.305649	0.305649	0.372586	0.238	0.077181	0.006584	0
77	63	0.296748	0.296748	0.363359	0.225141	0.091827	0.022925	0
78	0	0.405438	0.405438	0.353966	0.174649	0.051961	0.013986	0
78	0	0.330464	0.330464	0.294436	0.144261	0.101159	0.077319	0.037832
78	6	0.308244	0.308244	0.265337	0.13417	0.102887	0.078177	0.103186
78	15	0.345358	0.345358	0.285836	0.152116	0.072132	0.063414	0.072911
78	15	0.248507	0.248507	0.204787	0.114377	0.154142	0.151819	0.096861
79	0	0.357844	0.357844	0.350244	0.189132	0.073744	0.023237	0.005798
79	0	0.374143	0.374143	0.339592	0.17908	0.083761	0.022265	0.00116
79	3	0.349798	0.349798	0.356208	0.192475	0.074058	0.021122	0.006339
79	15	0.346287	0.346287	0.341846	0.192	0.080408	0.030099	0.00936
79	15	0.342885	0.342885	0.341629	0.190394	0.083163	0.031139	0.01079
79	63	0.32067	0.32067	0.326267	0.193785	0.091458	0.040622	0.019085
80	0	0.17911	0.17911	0.250297	0.194641	0.102104	0.044323	0.017443
80	3	0.231441	0.231441	0.321024	0.237409	0.13019	0.052367	0.021771
80	15	0.183263	0.183263	0.257581	0.206406	0.115225	0.058484	0.029912
80	15	0.197192	0.197192	0.27652	0.21423	0.118736	0.062193	0.031348
80	63	0.193953	0.193953	0.275956	0.219472	0.137112	0.07692	0.043538
81	0	0.320986	0.320986	0.344101	0.206795	0.087174	0.030851	0.010092
81	0	0.328723	0.328723	0.339849	0.203792	0.088429	0.030474	0.008733
81	3	0.321801	0.321801	0.342452	0.204621	0.092864	0.030216	0.008046
81	6	0.298813	0.298813	0.332457	0.226344	0.101435	0.029098	0.011854
81	15	0.304534	0.304534	0.338649	0.202426	0.097645	0.040978	0.015767
81	15	0.299135	0.299135	0.336324	0.203317	0.093893	0.040267	0.018407
81	63	0.283905	0.283905	0.321367	0.199447	0.096689	0.054539	0.029629
82	0	0.207819	0.207819	0.375231	0.258486	0.112693	0.037451	0.008319
82	0	0.160447	0.160447	0.349703	0.26679	0.133037	0.042802	0.023782
82	3	0.199467	0.199467	0.368442	0.264049	0.119745	0.040558	0.007739
82	3	0.416518	0.416518	0.346634	0.163418	0.057788	0.015643	0
82	6	0.409462	0.409462	0.354109	0.160746	0.059812	0.015871	0
82	6	0.402285	0.402285	0.350175	0.16918	0.060764	0.017596	0
82	15	0.396872	0.396872	0.338754	0.168921	0.065261	0.022719	0.007474
82	15	0.39606	0.39606	0.336866	0.166575	0.068113	0.023922	0.008464
82	63	0.370483	0.370483	0.32243	0.175713	0.078454	0.036029	0.016891
82	63	0.337858	0.337858	0.332885	0.188816	0.087129	0.038431	0.014881
83	0	0.323897	0.323897	0.345479	0.210558	0.087192	0.028827	0.004046
83	0	0.327725	0.327725	0.346692	0.201941	0.096455	0.027187	0
83	3	0.328531	0.328531	0.336791	0.208067	0.087989	0.030825	0.007798
83	6	0.345283	0.345283	0.345438	0.219366	0.089914	0	0
83	15	0.309318	0.309318	0.328429	0.207308	0.100765	0.038497	0.015684
83	15	0.302281	0.302281	0.325999	0.217823	0.094536	0.036367	0.016709
83	63	0.290869	0.290869	0.313092	0.20371	0.108118	0.043268	0.02798
84	0	0.543968	0.543968	0.32249	0.107435	0.026107	0	0
84	0	0.54305	0.54305	0.323576	0.108068	0.025306	0	0
84	3	0.545258	0.545258	0.314667	0.108681	0.027396	0.003998	0
84	3	0.542561	0.542561	0.321158	0.109185	0.027096	0	0
84	6	0.535227	0.535227	0.321292	0.109864	0.028244	0.005372	0
84	6	0.533809	0.533809	0.319498	0.111224	0.028954	0.006514	0
84	15	0.520622	0.520622	0.321993	0.117107	0.032432	0.007846	0
84	15	0.521384	0.521384	0.317391	0.118352	0.033865	0.009008	0
84	63	0.48857	0.48857	0.319916	0.131543	0.045506	0.014465	0
84	63	0.492096	0.492096	0.317393	0.130121	0.04543	0.01496	0
85	0	0.409465	0.409465	0.347623	0.168	0.058341	0.016571	0
85	0	0.412613	0.412613	0.350381	0.16395	0.055146	0.01791	0
85	3	0.402412	0.402412	0.350909	0.165495	0.063143	0.018041	0
85	6	0.422994	0.422994	0.338602	0.163243	0.058224	0.016936	0
85	15	0.38925	0.38925	0.321753	0.174187	0.082332	0.026932	0.005546
85	15	0.384978	0.384978	0.325549	0.163384	0.08221	0.028959	0.01492
85	63	0.360291	0.360291	0.295124	0.174095	0.094289	0.044556	0.020477
86	0	0.344047	0.344047	0.353584	0.197014	0.075916	0.023999	0.00544
86	0	0.348995	0.348995	0.351338	0.189798	0.081862	0.022656	0.005351
86	3	0.34536	0.34536	0.345805	0.192253	0.081914	0.027331	0.007337
86	6	0.344625	0.344625	0.337215	0.204219	0.080081	0.025648	0.008213
86	15	0.333643	0.333643	0.337265	0.198269	0.085351	0.032875	0.012597
86	15	0.331371	0.331371	0.339357	0.193689	0.086382	0.034902	0.0143
86	63	0.309773	0.309773	0.319569	0.19375	0.09755	0.045437	0.021481
87	0	0.486529	0.486529	0.335835	0.13168	0.037731	0.008226	0
87	0	0.487731	0.487731	0.335089	0.13095	0.037235	0.008995	0
87	3	0.490787	0.490787	0.329921	0.130748	0.0397	0.008844	0
87	3	0.487308	0.487308	0.334009	0.132541	0.03691	0.009232	0
87	15	0.467722	0.467722	0.330171	0.14149	0.046783	0.013834	0
87	15	0.470967	0.470967	0.327907	0.139976	0.046171	0.014979	0
87	63	0.433253	0.433253	0.323367	0.152368	0.057712	0.024316	0.008985
87	63	0.440827	0.440827	0.318573	0.149085	0.061186	0.022848	0.007482
88	0	0.443345	0.443345	0.335561	0.143647	0.045707	0.029226	0.002514
88	0	0.446413	0.446413	0.338251	0.145439	0.044389	0.022989	0.002519
88	3	0.450816	0.450816	0.336446	0.154139	0.04668	0.011919	0
88	3	0.447994	0.447994	0.339852	0.146427	0.048222	0.017505	0
88	3	0.451184	0.451184	0.337778	0.148678	0.047442	0.014918	0
88	6	0.444979	0.444979	0.340985	0.150224	0.049031	0.014781	0
88	6	0.443876	0.443876	0.33781	0.152583	0.050561	0.01517	0
88	15	0.424444	0.424444	0.328008	0.153236	0.055932	0.032327	0.006053
88	15	0.424641	0.424641	0.33242	0.154607	0.056862	0.024156	0.007314
88	63	0.397059	0.397059	0.319743	0.163319	0.071769	0.03422	0.01389
88	63	0.397787	0.397787	0.321085	0.161169	0.072815	0.034009	0.013136
89	0	0.357669	0.357669	0.336805	0.196362	0.083975	0.020637	0.004552
89	3	0.34552	0.34552	0.341107	0.201194	0.076919	0.025288	0.009973
89	15	0.336771	0.336771	0.333812	0.195106	0.087591	0.034675	0.012045
89	15	0.344594	0.344594	0.326687	0.191886	0.088087	0.034496	0.01425
89	63	0.310012	0.310012	0.306844	0.201973	0.100905	0.047452	0.019159
90	0	0.618413	0.618413	0.288258	0.078309	0.01502	0	0
90	0	0.618552	0.618552	0.286923	0.079719	0.014806	0	0
90	15	0.592736	0.592736	0.298238	0.088235	0.02079	0	0
90	63	0.570105	0.570105	0.302449	0.100877	0.026569	0	0
90	63	0.573003	0.573003	0.299981	0.100555	0.026461	0	0
91	0	0.321367	0.321367	0.344845	0.20486	0.086626	0.03367	0.008631
91	0	0.316151	0.316151	0.350058	0.205787	0.0877	0.032447	0.007857
91	3	0.342689	0.342689	0.344008	0.196819	0.08186	0.034624	0
91	3	0.317711	0.317711	0.348031	0.213276	0.089253	0.028859	0.00287
91	3	0.0307725	0.030772	0.191649	0.212321	0.131306	0.062808	0.019078
91	6	0.319486	0.319486	0.343694	0.207111	0.092567	0.029068	0.008074
91	6	0.320529	0.320529	0.337116	0.205211	0.091421	0.032582	0.013141
91	15	0.307959	0.307959	0.335489	0.209174	0.094173	0.038842	0.014363
91	15	0.305072	0.305072	0.331092	0.202242	0.098034	0.03885	0.017285
91	63	0.278585	0.278585	0.314165	0.201688	0.10517	0.054766	0.030733
92	0	0.546022	0.546022	0.319507	0.10845	0.026021	0	0
92	0	0.54983	0.54983	0.316221	0.107314	0.026635	0	0
92	3	0.539717	0.539717	0.316709	0.109317	0.028434	0.005822	0
92	3	0.543869	0.543869	0.320926	0.108467	0.026738	0	0
92	6	0.53671	0.53671	0.319528	0.109953	0.02795	0.005859	0
92	6	0.533427	0.533427	0.320226	0.111373	0.02874	0.006234	0
92	15	0.520354	0.520354	0.321582	0.118068	0.032359	0.007636	0
92	15	0.7107	0.7107	0.260091	0.02921	0	0	0
92	63	0.486471	0.486471	0.320322	0.133179	0.046068	0.013959	0
92	63	0.482047	0.482047	0.317601	0.136396	0.048428	0.015528	0
93	0	0.415145	0.415145	0.342875	0.159343	0.068217	0.01442	0
93	0	0.411153	0.411153	0.347641	0.167694	0.057898	0.015614	0
93	3	0.394442	0.394442	0.310823	0.174234	0.120501	0	0
93	3	0.403722	0.403722	0.349331	0.168643	0.060296	0.018008	0
93	6	0.405656	0.405656	0.339794	0.171048	0.064816	0.018686	0
93	6	0.402944	0.402944	0.345995	0.168166	0.063376	0.019518	0
93	15	0.390868	0.390868	0.3352	0.168973	0.071008	0.023805	0.010145
93	15	0.374754	0.374754	0.31763	0.158328	0.108631	0.024679	0.015979
93	63	0.35564	0.35564	0.30979	0.173927	0.085999	0.040197	0.022582
94	0	0.434396	0.434396	0.351396	0.162751	0.046008	0.005449	0
94	0	0.417421	0.417421	0.34753	0.162202	0.057157	0.01569	0
94	15	0.403088	0.403088	0.345738	0.168296	0.064217	0.018661	0
94	15	0.395184	0.395184	0.337652	0.164236	0.069998	0.024016	0.008916
94	63	0.371007	0.371007	0.320384	0.176132	0.080349	0.036113	0.016015
95	0	0.17911	0.17911	0.250297	0.194641	0.102104	0.044323	0.017443
95	3	0.231441	0.231441	0.321024	0.237409	0.13019	0.052367	0.021771
95	15	0.197192	0.197192	0.27652	0.21423	0.118736	0.062193	0.031348
95	63	0.193953	0.193953	0.275956	0.219472	0.137112	0.07692	0.043538
96	0	0.299861	0.299861	0.348995	0.215231	0.09203	0.0356	0.008283
96	0	0.350055	0.350055	0.352076	0.190297	0.076134	0.023243	0.008193
96	3	0.405015	0.405015	0.355008	0.188066	0.040475	0.011437	0
96	3	0.330491	0.330491	0.351057	0.20024	0.081534	0.030457	0.006221
96	3	0.342618	0.342618	0.350213	0.197288	0.075182	0.027623	0.007075
96	6	0.354846	0.354846	0.354928	0.194538	0.071119	0.024524	4.7e-05
96	6	0.342933	0.342933	0.354576	0.197278	0.082941	0.020256	0.002017
96	15	0.282607	0.282607	0.330919	0.224594	0.108236	0.044927	0.008716
96	15	0.336168	0.336168	0.327036	0.201235	0.088356	0.033615	0.01359
96	63	0.315665	0.315665	0.341927	0.18338	0.106511	0.042352	0.010165
96	63	0.207576	0.207576	0.399888	0.284301	0.07574	0.03348	-0.000985
97	0	0.461852	0.461852	0.338233	0.146856	0.044588	0.008471	0
97	0	0.463137	0.463137	0.338591	0.14553	0.042937	0.009805	0
97	6	0.452991	0.452991	0.338191	0.146681	0.04903	0.013108	0
97	15	0.44765	0.44765	0.333411	0.154667	0.051187	0.013085	0
97	15	0.445969	0.445969	0.334073	0.151525	0.050711	0.017722	0
97	63	0.429396	0.429396	0.324076	0.156225	0.060353	0.022586	0.007365
97	63	0.424793	0.424793	0.325494	0.154717	0.062067	0.02614	0.006789
98	0	0.433662	0.433662	0.330515	0.148342	0.050258	0.023181	0.014042
98	0	0.431385	0.431385	0.356819	0.150433	0.049359	0.012004	0
98	3	0.427559	0.427559	0.350538	0.15525	0.053546	0.013106	0
98	6	0.448624	0.448624	0.344145	0.146829	0.049335	0.011067	0
98	15	0.41172	0.41172	0.340215	0.168991	0.059863	0.019211	0
98	15	0.410494	0.410494	0.329974	0.16119	0.058873	0.025283	0.014186
98	63	0.386312	0.386312	0.322911	0.165366	0.078048	0.032047	0.015317
99	0	0.320986	0.320986	0.344101	0.206795	0.087174	0.030851	0.010092
99	0	0.328723	0.328723	0.339849	0.203792	0.088429	0.030474	0.008733
99	3	0.325137	0.325137	0.334548	0.213501	0.086825	0.030956	0.009033
99	6	0.334942	0.334942	0.334471	0.20397	0.081969	0.042065	0.002582
99	6	0.314167	0.314167	0.344725	0.203664	0.090658	0.035709	0.011077
99	15	0.304534	0.304534	0.338649	0.202426	0.097645	0.040978	0.015767
99	15	0.299135	0.299135	0.336324	0.203317	0.093893	0.040267	0.018407
99	63	0.283905	0.283905	0.321367	0.199447	0.096689	0.054539	0.029629
99	63	0.278229	0.278229	0.297794	0.223868	0.113618	0.056931	0.022001
100	0	0.269214	0.269214	0.321835	0.220151	0.100867	0.036759	0.023197
100	3	0.285546	0.285546	0.303745	0.21203	0.092339	0.032508	0.028131
100	15	0.169041	0.169041	0.209482	0.153439	0.077584	0.031304	0.102334
100	15	0.203102	0.203102	0.232244	0.155666	0.082155	0.034142	0.082019
101	0	0.254321	0.254321	0.305273	0.238983	0.129063	0.066368	0.005993
101	15	0.20215	0.20215	0.325909	0.236002	0.130329	0.076186	0.019379
101	15	0.237346	0.237346	0.308698	0.234996	0.113221	0.060107	0.024659
101	63	0.218435	0.218435	0.299924	0.26011	0.103999	0.065956	0.041147
102	0	0.518651	0.518651	0.330216	0.121169	0.028272	0.001691	0
102	0	0.536721	0.536721	0.324294	0.112396	0.026589	0	0
102	3	0.528851	0.528851	0.318439	0.116306	0.030923	0.005481	0
102	15	0.4903	0.4903	0.316788	0.141923	0.04321	0.007778	0
102	15	0.478771	0.478771	0.324867	0.137294	0.049264	0.009804	0
102	63	0.437538	0.437538	0.324584	0.152973	0.070147	0.014758	0
103	0	0.236117	0.236117	0.299118	0.306562	0.093876	0.020251	0.040277
103	3	0.247615	0.247615	0.335379	0.233109	0.116353	0.047141	0.018967
103	6	0.267417	0.267417	0.300271	0.239537	0.142725	0.037688	0.012363
103	15	0.23085	0.23085	0.321499	0.254106	0.116214	0.045587	0.025001
103	15	0.232975	0.232975	0.318514	0.237073	0.127927	0.054615	0.024805
104	0	0.359297	0.359297	0.352337	0.189136	0.071035	0.022478	0.005717
104	3	0.350659	0.350659	0.352664	0.189579	0.075858	0.024726	0.006514
104	6	0.349093	0.349093	0.350345	0.188046	0.079293	0.026991	0.006232
104	15	0.343495	0.343495	0.343141	0.194193	0.081043	0.028573	0.009554
104	15	0.341434	0.341434	0.340983	0.196385	0.081022	0.029724	0.010452
104	63	0.318817	0.318817	0.321713	0.198438	0.093345	0.042246	0.01804
105	0	0.45689	0.45689	0.338441	0.147225	0.045802	0.011642	0
105	0	0.463437	0.463437	0.33642	0.144214	0.044345	0.011583	0
105	3	0.452225	0.452225	0.334284	0.151674	0.049024	0.012793	0
105	3	0.456348	0.456348	0.338019	0.147685	0.04555	0.012398	0
105	6	0.451991	0.451991	0.338119	0.148278	0.04864	0.012972	0
105	6	0.450637	0.450637	0.337678	0.148388	0.049181	0.014116	0
105	15	0.438766	0.438766	0.333445	0.154873	0.055071	0.017844	0
105	15	0.435949	0.435949	0.330691	0.155705	0.05824	0.019415	0
105	63	0.401351	0.401351	0.319406	0.165179	0.07166	0.029729	0.012675
105	63	0.399359	0.399359	0.319593	0.167184	0.071329	0.030666	0.011869
106	0	0.314142	0.314142	0.342198	0.199638	0.102833	0.0318	0.009388
106	0	0.325429	0.325429	0.328268	0.223165	0.081917	0.035628	0.005593
106	3	0.341196	0.341196	0.344358	0.177793	0.091458	0.036057	0.009138
106	15	0.294472	0.294472	0.324239	0.19984	0.118069	0.042132	0.018104
106	15	0.306617	0.306617	0.339324	0.191107	0.10662	0.041721	0.014611
106	63	0.282939	0.282939	0.319349	0.194425	0.138636	0.038516	0.020002
107	0	0.223677	0.223677	0.318918	0.243091	0.130807	0.056329	0.019884
107	0	0.266085	0.266085	0.31989	0.237453	0.122244	0.040352	0.013976
107	3	0.224708	0.224708	0.327613	0.243149	0.134409	0.056573	0.013548
107	3	0.233116	0.233116	0.316178	0.241728	0.127813	0.053748	0.020386
107	6	0.227902	0.227902	0.319242	0.240583	0.125007	0.057049	0.024385
107	15	0.221764	0.221764	0.306184	0.234914	0.134638	0.063176	0.026442
107	15	0.223019	0.223019	0.303461	0.23384	0.133265	0.063052	0.029602
107	63	0.200824	0.200824	0.281736	0.223306	0.132105	0.070572	0.041302
108	0	0.343841	0.343841	0.357739	0.195459	0.074985	0.02215	0.005826
108	0	0.424899	0.424899	0.345511	0.161671	0.054923	0.012996	0
108	3	0.338046	0.338046	0.354451	0.194132	0.07465	0.02233	0.016391
108	3	0.245453	0.245453	0.371672	0.234951	0.101964	0.03808	0.007881
108	15	0.321594	0.321594	0.350923	0.204182	0.086065	0.028033	0.009202
108	15	0.40861	0.40861	0.343376	0.165839	0.062922	0.019253	0
108	63	0.377724	0.377724	0.3289	0.177883	0.075006	0.027881	0.012606
109	0	0.517512	0.517512	0.325036	0.11965	0.031462	0.006341	0
109	0	0.513157	0.513157	0.327901	0.120089	0.03211	0.006743	0
109	3	0.512734	0.512734	0.327596	0.120332	0.032481	0.006858	0
109	3	0.510313	0.510313	0.328892	0.121582	0.032637	0.006576	0
109	6	0.50795	0.50795	0.32976	0.12179	0.033664	0.006835	0
109	6	0.507774	0.507774	0.32665	0.123128	0.034004	0.008444	0
109	15	0.495756	0.495756	0.325383	0.12993	0.038805	0.010125	0
109	15	0.489731	0.489731	0.326349	0.132073	0.040615	0.011232	0
109	63	0.460475	0.460475	0.324582	0.143582	0.053184	0.018177	0
109	63	0.461501	0.461501	0.324715	0.143033	0.052289	0.018461	0
110	0	0.375484	0.375484	0.383461	0.173928	0.066892	0.000235	0
110	0	0.0833775	0.083377	0.335862	0.376772	0.174495	0.031681	-0.002188
110	6	0.461841	0.461841	0.307655	0.162485	0.068018	0	0
110	6	0.344505	0.344505	0.330694	0.211825	0.097552	0.015425	0
110	15	0.342993	0.342993	0.377136	0.205363	0.067323	0.007185	0
110	15	0.402319	0.402319	0.352314	0.174908	0.050932	0.019528	0
111	0	0.325259	0.325259	0.342655	0.206063	0.090247	0.027696	0.008081
111	0	0.326985	0.326985	0.353404	0.198977	0.086098	0.027465	0.007071
111	3	0.32046	0.32046	0.337241	0.21005	0.089934	0.032298	0.010016
111	6	0.31684	0.31684	0.338206	0.202426	0.103908	0.027369	0.011251
111	15	0.301978	0.301978	0.338002	0.206335	0.095407	0.041494	0.016784
111	15	0.305427	0.305427	0.331904	0.198428	0.094353	0.039745	0.019606
111	63	0.269691	0.269691	0.312771	0.210937	0.099825	0.052576	0.026832
112	0	0.343072	0.343072	0.384103	0.173117	0.066102	0.030606	0.003
112	3	0.330495	0.330495	0.346562	0.191511	0.102335	0.023992	0.005105
112	6	0.32749	0.32749	0.372414	0.210597	0.076918	0.012581	0
112	15	0.34305	0.34305	0.365739	0.19053	0.08477	0.015911	0
112	15	0.338708	0.338708	0.337124	0.194865	0.079891	0.037586	0.011826
112	63	0.278075	0.278075	0.301926	0.161845	0.066864	0.03595	0.015462
113	0	0.343841	0.343841	0.357739	0.195459	0.074985	0.02215	0.005826
113	0	0.424899	0.424899	0.345511	0.161671	0.054923	0.012996	0
113	3	0.421178	0.421178	0.349176	0.161219	0.053686	0.01474	0
113	6	0.293192	0.293192	0.374032	0.252704	0.062532	0.017541	0
113	6	0.418019	0.418019	0.345397	0.164483	0.055574	0.016527	0
113	15	0.321594	0.321594	0.350923	0.204182	0.086065	0.028033	0.009202
113	15	0.40861	0.40861	0.343376	0.165839	0.062922	0.019253	0
113	63	0.377724	0.377724	0.3289	0.177883	0.075006	0.027881	0.012606
113	63	0.356658	0.356658	0.336795	0.186287	0.076858	0.02846	0.014942
114	0	0.528489	0.528489	0.316612	0.116697	0.031887	0.006315	0
114	0	0.513153	0.513153	0.329657	0.116215	0.03243	0.008545	0
114	3	0.530311	0.530311	0.323675	0.122938	0.023076	0	0
114	3	0.521623	0.521623	0.322356	0.123593	0.03005	0.002377	0
114	3	0.509453	0.509453	0.324644	0.122651	0.036045	0.007207	0
114	6	0.505759	0.505759	0.31761	0.128018	0.039019	0.009594	0
114	15	0.495932	0.495932	0.32113	0.132335	0.041639	0.008965	0
114	15	0.488904	0.488904	0.321798	0.132784	0.042985	0.013529	0
114	63	0.464093	0.464093	0.31739	0.147841	0.052107	0.01857	0
115	0	0.244024	0.244024	0.327359	0.236896	0.124506	0.05091	0.016305
115	3	0.244804	0.244804	0.323335	0.234491	0.114983	0.075389	0.006998
115	3	0.246008	0.246008	0.324238	0.23617	0.121921	0.049264	0.017175
115	15	0.238074	0.238074	0.309842	0.234035	0.125112	0.057157	0.024938
115	15	0.233659	0.233659	0.312957	0.233155	0.125606	0.057442	0.02617
115	63	0.220518	0.220518	0.292978	0.219463	0.130368	0.065133	0.037339
116	0	0.517829	0.517829	0.321443	0.120793	0.032417	0.007518	0
116	0	0.517736	0.517736	0.321599	0.119837	0.033686	0.007142	0
116	3	0.515979	0.515979	0.323016	0.120332	0.034632	0.006041	0
116	15	0.495912	0.495912	0.325251	0.130409	0.038535	0.009893	0
116	15	0.493085	0.493085	0.323998	0.130089	0.041069	0.011758	0
116	63	0.465243	0.465243	0.321071	0.143272	0.05342	0.016994	0
116	63	0.468105	0.468105	0.319054	0.143912	0.0518	0.01713	0
117	0	0.202911	0.202911	0.40422	0.183715	0.083641	0.121102	0.004411
117	3	0.250606	0.250606	0.33318	0.233877	0.122356	0.045416	0.014565
117	6	0.225757	0.225757	0.359981	0.208355	0.115713	0.07835	0.011844
117	15	0.229	0.229	0.333274	0.223356	0.111801	0.070481	0.022207
117	15	0.225343	0.225343	0.340677	0.215458	0.112174	0.071272	0.023734
118	0	0.35774	0.35774	0.339472	0.205102	0.080055	0.01763	0
118	6	0.390741	0.390741	0.344448	0.202019	0.058703	0.004088	0
118	15	0.325674	0.325674	0.332059	0.191344	0.087166	0.034744	0.017937
118	15	0.32886	0.32886	0.332959	0.19352	0.090529	0.033119	0.017837
118	63	0.291602	0.291602	0.303542	0.183765	0.087223	0.06313	0.049226
119	0	0.223677	0.223677	0.318918	0.243091	0.130807	0.056329	0.019884
119	3	0.221031	0.221031	0.310852	0.231406	0.135945	0.070837	0.029929
119	15	0.221764	0.221764	0.306184	0.234914	0.134638	0.063176	0.026442
119	15	0.223019	0.223019	0.303461	0.23384	0.133265	0.063052	0.029602
119	63	0.200824	0.200824	0.281736	0.223306	0.132105	0.070572	0.041302
120	0	0.357844	0.357844	0.350244	0.189132	0.073744	0.023237	0.005798
120	3	0.346689	0.346689	0.358702	0.188113	0.083515	0.019974	0.003007
120	3	0.349798	0.349798	0.356208	0.192475	0.074058	0.021122	0.006339
120	15	0.346287	0.346287	0.341846	0.192	0.080408	0.030099	0.00936
120	15	0.342885	0.342885	0.341629	0.190394	0.083163	0.031139	0.01079
120	63	0.32067	0.32067	0.326267	0.193785	0.091458	0.040622	0.019085
121	0	0.420897	0.420897	0.352297	0.162563	0.05123	0.013013	0
121	0	0.409122	0.409122	0.349921	0.167372	0.057976	0.015608	0
121	3	0.42801	0.42801	0.329577	0.16347	0.068374	0.010569	0
121	6	0.407725	0.407725	0.342921	0.161438	0.066171	0.020494	0.00125
121	15	0.384407	0.384407	0.344847	0.173532	0.071761	0.021102	0.004351
121	15	0.418846	0.418846	0.332986	0.15052	0.063296	0.026109	0.008243
121	63	0.373229	0.373229	0.337008	0.181924	0.077722	0.025606	0.004511
121	63	0.398196	0.398196	0.326832	0.195539	0.072063	0.00737	0
122	0	0.370698	0.370698	0.346482	0.184051	0.060347	0.024055	0.014368
122	0	0.366193	0.366193	0.343536	0.182815	0.072837	0.026291	0.008328
122	3	0.364034	0.364034	0.350435	0.182491	0.074142	0.025276	0.003622
122	15	0.351397	0.351397	0.332507	0.189471	0.079459	0.031272	0.015893
122	15	0.339341	0.339341	0.333034	0.184578	0.09204	0.03699	0.014017
123	0	0.41506	0.41506	0.34957	0.161795	0.058463	0.015112	0
123	3	0.417195	0.417195	0.347896	0.175329	0.051197	0.008383	0
123	3	0.416706	0.416706	0.34231	0.166625	0.057496	0.016863	0
123	6	0.409194	0.409194	0.346712	0.165636	0.061244	0.017214	0
123	6	0.409901	0.409901	0.341908	0.168114	0.061332	0.018746	0
123	15	0.398162	0.398162	0.334833	0.168862	0.066295	0.023444	0.008403
123	63	0.361162	0.361162	0.315325	0.176263	0.082128	0.038065	0.01829
123	63	0.365808	0.365808	0.319016	0.184407	0.078508	0.03891	0.013351
124	0	0.314142	0.314142	0.342198	0.199638	0.102833	0.0318	0.009388
124	0	0.312521	0.312521	0.352005	0.210974	0.085791	0.030803	0.007907
124	3	0.317185	0.317185	0.350473	0.199366	0.095608	0.028774	0.008594
124	6	0.321838	0.321838	0.372417	0.219925	0.076253	0.009567	0
124	6	0.31595	0.31595	0.36618	0.193886	0.08987	0.029292	0.004822
124	15	0.294472	0.294472	0.324239	0.19984	0.118069	0.042132	0.018104
124	15	0.306617	0.306617	0.339324	0.191107	0.10662	0.041721	0.014611
124	63	0.285996	0.285996	0.31251	0.189876	0.11026	0.054494	0.031393
125	0	0.306799	0.306799	0.344287	0.214252	0.098045	0.031997	0.004619
125	0	0.289843	0.289843	0.349173	0.215246	0.09331	0.042713	0.009714
125	3	0.294556	0.294556	0.344303	0.215971	0.098314	0.036417	0.01044
125	6	0.295633	0.295633	0.341351	0.217446	0.098543	0.035399	0.011627
125	6	0.294654	0.294654	0.341289	0.219896	0.094769	0.038274	0.011118
125	15	0.28753	0.28753	0.327376	0.212734	0.10476	0.043232	0.017275
125	15	0.284606	0.284606	0.328304	0.214912	0.102116	0.043756	0.018159
125	63	0.270514	0.270514	0.318066	0.201588	0.110168	0.055561	0.029395
126	3	0.632049	0.632049	0.283516	0.07082	0.013616	0	0
126	3	0.637596	0.637596	0.275806	0.075097	0.011501	0	0
126	6	0.618178	0.618178	0.285912	0.080187	0.015723	0	0
126	15	0.615572	0.615572	0.285988	0.080607	0.017833	0	0
126	15	0.614058	0.614058	0.283733	0.084784	0.017425	0	0
126	63	0.585059	0.585059	0.295995	0.094892	0.024054	0	0
126	63	0.587957	0.587957	0.295916	0.092345	0.023783	0	0
127	0	0.254722	0.254722	0.345738	0.234487	0.109821	0.052468	0.002764
127	15	0.229	0.229	0.333274	0.223356	0.111801	0.070481	0.022207
127	15	0.225343	0.225343	0.340677	0.215458	0.112174	0.071272	0.023734
127	63	0.178315	0.178315	0.365111	0.203102	0.111855	0.109081	0.021611
128	0	0.22411	0.22411	0.343629	0.258186	0.131668	0.037318	0.005089
128	6	0.23805	0.23805	0.321739	0.284959	0.110964	0.030059	0.014229
128	15	0.22528	0.22528	0.306589	0.238151	0.127641	0.060654	0.031183
128	63	0.195446	0.195446	0.304476	0.241556	0.135234	0.059598	0.042615
129	0	0.506884	0.506884	0.312832	0.128965	0.040086	0.011233	0
129	0	0.502447	0.502447	0.315224	0.131057	0.039954	0.011317	0
129	3	0.505221	0.505221	0.316636	0.128234	0.040916	0.008993	0
129	3	0.504561	0.504561	0.315004	0.129858	0.039205	0.011372	0
129	6	0.495626	0.495626	0.319396	0.132366	0.041549	0.011063	0
129	6	0.495903	0.495903	0.320553	0.130219	0.041697	0.011628	0
129	15	0.488227	0.488227	0.318807	0.137035	0.043526	0.012404	0
129	15	0.488322	0.488322	0.3149	0.138059	0.045274	0.013445	0
129	63	0.45787	0.45787	0.319098	0.150228	0.054416	0.018388	0
129	63	0.459919	0.459919	0.319432	0.147612	0.054949	0.018087	0
130	0	0.427817	0.427817	0.306608	0.153006	0.068257	0.031645	0.012667
130	0	0.425865	0.425865	0.33833	0.157782	0.059252	0.018771	0
130	3	0.333676	0.333676	0.325663	0.20149	0.093147	0.034074	0.011949
130	6	0.271287	0.271287	0.286072	0.220046	0.135032	0.059204	0.023088
130	15	0.183525	0.183525	0.25955	0.25363	0.173814	0.091078	0.027806
130	15	0.158445	0.158445	0.238971	0.262509	0.173639	0.109061	0.019538
131	0	0.520383	0.520383	0.281588	0.126253	0.047455	0.024321	0
131	3	0.54042	0.54042	0.313914	0.114826	0.029467	0.001372	0
131	6	0.547076	0.547076	0.301766	0.119341	0.027814	0.004002	0
131	6	0.54035	0.54035	0.309875	0.116561	0.02985	0.003365	0
131	15	0.455962	0.455962	0.340673	0.151203	0.033566	0.018595	0
131	15	0.526408	0.526408	0.320739	0.12847	0.024383	0	0
132	0	0.441143	0.441143	0.344279	0.152668	0.049704	0.012206	0
132	0	0.4399	0.4399	0.340139	0.155398	0.053648	0.010916	0
132	3	0.442473	0.442473	0.346244	0.148238	0.051573	0.011473	0
132	6	0.435137	0.435137	0.346254	0.155398	0.049488	0.013722	0
132	6	0.428828	0.428828	0.348822	0.15664	0.051949	0.013762	0
132	15	0.422673	0.422673	0.337312	0.16263	0.05664	0.020744	0
132	15	0.419243	0.419243	0.341261	0.157379	0.061197	0.020921	0
132	63	0.38869	0.38869	0.32248	0.171032	0.07114	0.033487	0.013171
132	63	0.387248	0.387248	0.33002	0.164847	0.078293	0.0328	0.006792
133	0	0.554694	0.554694	0.266207	0.131038	0.030773	0.017288	0
133	0	0.554538	0.554538	0.315001	0.106121	0.02434	0	0
133	3	0.478833	0.478833	0.332205	0.150994	0.0259	0.012068	0
133	3	0.510578	0.510578	0.324789	0.134193	0.025865	0.004575	0
133	3	0.478904	0.478904	0.32632	0.133289	0.048043	0.013443	0
133	6	0.41919	0.41919	0.325076	0.172062	0.069606	0.014066	0
133	6	0.382496	0.382496	0.306973	0.190593	0.080748	0.027021	0.012169
133	15	0.267593	0.267593	0.316877	0.23187	0.121288	0.050119	0.012254
134	0	0.50101	0.50101	0.292773	0.084085	0.12128	0.000852	0
134	0	0.559524	0.559524	0.315503	0.105774	0.0192	0	0
134	3	0.49241	0.49241	0.365481	0.094456	0.047653	0	0
134	3	0.50874	0.50874	0.317043	0.11804	0.050621	0.005557	0
134	6	0.421918	0.421918	0.317664	0.167758	0.071995	0.020664	0
134	6	0.407426	0.407426	0.292597	0.181372	0.083042	0.028338	0.007224
134	15	0.288802	0.288802	0.321795	0.223143	0.112139	0.044808	0.009313
134	15	0.232629	0.232629	0.300258	0.240584	0.160515	0.044304	0.021776
134	63	0.163867	0.163867	0.303928	0.270506	0.175382	0.06005	0.02449
135	0	0.490496	0.490496	0.31344	0.127693	0.05373	0.014642	0
135	3	0.415192	0.415192	0.326923	0.158806	0.068898	0.023035	0.007147
135	6	0.306888	0.306888	0.285135	0.18527	0.126345	0.069798	0.019241
135	63	0.123398	0.123398	0.195289	0.262695	0.223865	0.107293	0.036951
136	3	0.349743	0.349743	0.282779	0.203333	0.09867	0.043813	0.020408
136	3	0.421241	0.421241	0.350562	0.155148	0.060727	0.012322	0
136	6	0.421951	0.421951	0.327879	0.169592	0.061944	0.018633	0
136	15	0.271535	0.271535	0.251416	0.21524	0.147485	0.077481	0.031255
136	63	0.315786	0.315786	0.307766	0.189296	0.110605	0.041659	0.025065
136	63	0.358926	0.358926	0.3038	0.175493	0.0909	0.046492	0.01926
137	3	0.51347	0.51347	0.325278	0.127122	0.030149	0.00398	0
137	3	0.479638	0.479638	0.343652	0.134027	0.035265	0.007418	0
137	6	0.439167	0.439167	0.341222	0.168638	0.049791	0.001182	0
137	6	0.514041	0.514041	0.321864	0.126194	0.035602	0.002298	0
137	15	0.577527	0.577527	0.329658	0.065641	0.027173	0	0
137	63	0.469813	0.469813	0.318413	0.153772	0.04829	0.009711	0
137	63	0.465095	0.465095	0.331802	0.153269	0.04753	0.002304	0
138	0	0.349076	0.349076	0.362461	0.197614	0.074688	0.016162	0
138	3	0.297201	0.297201	0.297585	0.193071	0.087198	0.036682	0.036222
138	15	0.184878	0.184878	0.256706	0.210432	0.163074	0.106086	0.053726
138	15	0.179871	0.179871	0.234662	0.202793	0.155759	0.11546	0.074018
139	0	0.175922	0.175922	0.098591	0.048197	0.013225	0.109932	0.31233
139	0	0.528414	0.528414	0.330186	0.117249	0.024151	0	0
139	3	0.492929	0.492929	0.323241	0.130399	0.038676	0.014755	0
139	6	0.462656	0.462656	0.314077	0.138201	0.043374	0.027153	0.014539
140	0	0.538791	0.538791	0.339842	0.100249	0.021119	0	0
140	0	0.499325	0.499325	0.286409	0.108924	0.033373	0.033685	0.027484
140	3	0.438068	0.438068	0.289628	0.12652	0.039317	0.049565	0.042679
140	6	0.423578	0.423578	0.310543	0.1441	0.054502	0.032309	0.02292
140	6	0.42025	0.42025	0.317488	0.139525	0.054558	0.034462	0.02219
140	15	0.297532	0.297532	0.274805	0.170731	0.071008	0.038477	0.098595
140	15	0.260736	0.260736	0.230168	0.165453	0.087756	0.035479	0.090251
141	0	0.492397	0.492397	0.324236	0.121877	0.045196	0.016294	0
141	0	0.504235	0.504235	0.327206	0.124299	0.03539	0.00887	0
141	3	0.495834	0.495834	0.346558	0.120803	0.030106	0.006699	0
141	3	0.488633	0.488633	0.330676	0.133311	0.038929	0.008451	0
141	3	0.476974	0.476974	0.329187	0.127451	0.050096	0.016291	0
141	6	0.455072	0.455072	0.325547	0.145222	0.054868	0.019291	0
141	6	0.437383	0.437383	0.311378	0.14285	0.064758	0.031257	0.012374
141	15	0.378418	0.378418	0.316647	0.170077	0.083194	0.038758	0.012907
141	15	0.380185	0.380185	0.316641	0.161735	0.085345	0.04116	0.014934
141	63	0.11896	0.11896	0.248718	0.276286	0.191703	0.101876	0.044154
141	63	0.128468	0.128468	0.255338	0.27234	0.194161	0.097949	0.040354
142	0	0.439352	0.439352	0.28606	0.12788	0.083659	0.036423	0.025415
142	0	0.506671	0.506671	0.330942	0.125077	0.03731	0	0
142	3	0.47673	0.47673	0.334941	0.13803	0.042137	0.008162	0
142	15	0.340151	0.340151	0.265079	0.126095	0.102468	0.070203	0.08734
142	15	0.356283	0.356283	0.244578	0.112418	0.118551	0.080401	0.079262
143	0	0.564668	0.564668	0.303962	0.104452	0.026918	0	0
143	3	0.448632	0.448632	0.337325	0.146679	0.05631	0.011054	0
143	3	0.457709	0.457709	0.318387	0.158962	0.045529	0.019413	0
143	6	0.38178	0.38178	0.334073	0.189956	0.075502	0.018689	0
143	6	0.340506	0.340506	0.344787	0.204116	0.079961	0.025217	0.005413
143	15	0.212716	0.212716	0.266845	0.162182	0.077434	0.025249	0.255574
143	15	0.242589	0.242589	0.341544	0.213666	0.103017	0.022414	0.076771
143	63	0.247185	0.247185	0.34515	0.242712	0.109032	0.040339	0.015583
143	63	0.253604	0.253604	0.349245	0.241618	0.111312	0.03868	0.005541
144	0	0.567487	0.567487	0.270081	0.123241	0.036846	0.002345	0
144	0	0.562216	0.562216	0.287322	0.115719	0.030299	0.004444	0
144	3	0.425411	0.425411	0.340631	0.175767	0.044445	0.013747	0
144	3	0.448178	0.448178	0.312583	0.164683	0.056607	0.017949	0
144	6	0.328847	0.328847	0.349682	0.201382	0.079945	0.031762	0.008383
144	6	0.314746	0.314746	0.309719	0.218636	0.107687	0.035537	0.013676
144	15	0.20568	0.20568	0.338806	0.252182	0.13562	0.0575	0.010212
145	0	0.427323	0.427323	0.351526	0.157089	0.0508	0.013262	0
145	3	0.304567	0.304567	0.335709	0.217244	0.09959	0.034098	0.008792
145	6	0.206064	0.206064	0.285557	0.245355	0.153977	0.07299	0.026718
145	15	0.133068	0.133068	0.26393	0.270441	0.187397	0.096328	0.035522
145	15	0.113449	0.113449	0.245766	0.265124	0.201866	0.106967	0.041982
145	63	0.108456	0.108456	0.24168	0.270477	0.201698	0.112118	0.044487
146	0	0.332654	0.332654	0.332751	0.200998	0.089477	0.032896	0.011223
146	0	1	1	0	0	0	0	0
146	3	0.214014	0.214014	0.274988	0.221248	0.152799	0.090766	0.037615
146	6	0.996813	0.996813	0.003187	0	0	0	0
146	15	0.153833	0.153833	0.152581	0.18801	0.187535	0.136613	0.086668
146	15	0.0597247	0.059725	0.126141	0.192034	0.206789	0.180431	0.122667
147	0	0.441234	0.441234	0.311249	0.1652	0.066478	0.015839	0
147	3	0.283563	0.283563	0.402905	0.189288	0.078191	0.025476	0.020595
147	6	0.220788	0.220788	0.279823	0.250477	0.140488	0.08478	0.021763
147	15	0.117203	0.117203	0.249325	0.255667	0.195724	0.110136	0.052549
147	63	0.113225	0.113225	0.245601	0.27098	0.192058	0.106962	0.047677
148	0	0.451612	0.451612	0.315097	0.158636	0.060853	0.013802	0
148	0	0.478657	0.478657	0.361862	0.13843	0.021052	0	0
148	3	0.301766	0.301766	0.337199	0.183877	0.084798	0.046866	0.020945
148	6	0.231986	0.231986	0.295479	0.236229	0.137785	0.062366	0.026489
148	6	0.212137	0.212137	0.267956	0.23972	0.156633	0.075559	0.035216
148	15	0.105036	0.105036	0.22847	0.253171	0.192351	0.11043	0.053097
148	63	0.114084	0.114084	0.244716	0.265724	0.189292	0.109619	0.049009
148	63	0.1178	0.1178	0.243658	0.258401	0.183722	0.105003	0.046514
149	0	0.375589	0.375589	0.329869	0.180821	0.087499	0.023123	0.003098
149	3	0.247804	0.247804	0.308268	0.203143	0.135855	0.06993	0.034999
149	15	0.210699	0.210699	0.174049	0.218511	0.216572	0.111009	0.052778
149	15	0.082941	0.082941	0.182147	0.233481	0.250588	0.15136	0.078746
150	0	0.45098	0.45098	0.314792	0.156373	0.062057	0.015798	0
150	0	0.504355	0.504355	0.276563	0.167294	0.042057	0.009732	0
150	3	0.337416	0.337416	0.312501	0.243069	0.089064	0.01795	0
150	3	0.342348	0.342348	0.331476	0.20722	0.096427	0.019208	0.00332
150	6	0.250669	0.250669	0.270491	0.228825	0.130469	0.072449	0.032111
150	6	0.210207	0.210207	0.26582	0.232898	0.153807	0.083307	0.036816
150	15	0.12608	0.12608	0.242693	0.265531	0.19354	0.107982	0.047362
150	15	0.101641	0.101641	0.227256	0.247551	0.209516	0.125335	0.058418
150	63	0.0988919	0.098892	0.229652	0.265264	0.207839	0.117517	0.052072
150	63	0.096322	0.096322	0.231852	0.259821	0.210436	0.119964	0.05392
151	0	0.520913	0.520913	0.320861	0.124236	0.029226	0.004764	0
151	3	0.391011	0.391011	0.339938	0.184105	0.061951	0.021506	0.001489
151	3	0.416333	0.416333	0.345626	0.162293	0.058222	0.017526	0
151	6	0.300965	0.300965	0.33368	0.217659	0.100192	0.037143	0.010361
151	15	0.223742	0.223742	0.324771	0.263261	0.127644	0.049371	0.011212
151	15	0.193154	0.193154	0.314603	0.267595	0.152424	0.057376	0.014848
151	63	0.186891	0.186891	0.318391	0.268997	0.147395	0.056207	0.017151
151	63	0.193464	0.193464	0.321655	0.265803	0.144858	0.059268	0.014952
152	0	0.519058	0.519058	0.301415	0.134808	0.036375	0.008344	0
152	3	0.395241	0.395241	0.325894	0.177887	0.068411	0.025939	0.006627
152	6	0.278211	0.278211	0.294664	0.236497	0.131743	0.047501	0.011384
152	15	0.16739	0.16739	0.319002	0.287089	0.153477	0.058326	0.014716
152	63	0.166875	0.166875	0.28831	0.268032	0.176866	0.073048	0.022913
153	0	0.480683	0.480683	0.337741	0.13369	0.039675	0.008211	0
153	3	0.347098	0.347098	0.344737	0.189879	0.081234	0.027204	0.009849
153	15	0.175739	0.175739	0.300861	0.262804	0.157266	0.066138	0.027842
153	15	0.147619	0.147619	0.280704	0.273259	0.178287	0.079527	0.031857
153	63	0.14629	0.14629	0.283253	0.270479	0.179696	0.07916	0.032109
154	0	0.396647	0.396647	0.323415	0.192194	0.071462	0.016282	0
154	0	0.367117	0.367117	0.328307	0.191358	0.082543	0.02947	0.001205
154	3	0.255875	0.255875	0.311348	0.226273	0.120334	0.056057	0.021325
154	6	0.207234	0.207234	0.268032	0.249838	0.150997	0.086376	0.034752
154	6	0.167727	0.167727	0.233533	0.226778	0.187781	0.106785	0.049031
154	15	0.103054	0.103054	0.225169	0.245838	0.214955	0.13943	0.063325
154	63	0.084198	0.084198	0.207142	0.242642	0.21918	0.138273	0.069861
155	0	0.439222	0.439222	0.310383	0.170595	0.064261	0.015538	0
155	0	0.492798	0.492798	0.325621	0.144458	0.0351	0.002022	0
155	3	0.245694	0.245694	0.319025	0.244832	0.107387	0.06366	0.019402
155	3	0.318918	0.318918	0.315248	0.214412	0.094945	0.04986	0.006616
155	6	0.168103	0.168103	0.246408	0.249925	0.168907	0.093467	0.048952
155	15	0.0688032	0.068803	0.187351	0.255032	0.232944	0.137443	0.083144
155	63	0.0823418	0.082342	0.212577	0.251037	0.21238	0.130546	0.073116
156	0	0.456013	0.456013	0.345372	0.146616	0.042616	0.009383	0
156	0	0.453821	0.453821	0.346848	0.144305	0.045096	0.00993	0
156	3	0.282654	0.282654	0.366352	0.202685	0.116272	0.032361	-0.000324
156	3	0.320218	0.320218	0.306899	0.218048	0.102231	0.043057	0.009547
156	3	0.298119	0.298119	0.323077	0.213798	0.106858	0.042167	0.01598
156	6	0.21542	0.21542	0.288833	0.242569	0.142785	0.07089	0.02986
156	6	0.184094	0.184094	0.271087	0.241024	0.155689	0.087798	0.0424
156	15	0.110108	0.110108	0.238039	0.267468	0.198053	0.115588	0.049738
156	15	0.0856944	0.085694	0.202844	0.254684	0.219162	0.138165	0.061421
156	63	0.0839248	0.083925	0.203172	0.263239	0.211439	0.136934	0.066963
156	63	0.0818383	0.081838	0.215737	0.269256	0.216239	0.128269	0.063577
157	0	0.386128	0.386128	0.34931	0.178368	0.063782	0.019933	0.00248
157	3	0.39844	0.39844	0.349264	0.171175	0.064071	0.01705	0
157	6	0.389941	0.389941	0.349841	0.181296	0.061311	0.017611	0
157	15	0.380859	0.380859	0.346871	0.171857	0.057408	0.041474	0.001531
157	15	0.378501	0.378501	0.347378	0.187265	0.072104	0.014753	0
157	63	0.387247	0.387247	0.348736	0.183812	0.065952	0.014252	0
158	0	0.403323	0.403323	0.249244	0.090939	0.196313	0.042524	0.017658
158	0	0.521173	0.521173	0.324129	0.117383	0.030627	0.006689	0
158	3	0.520799	0.520799	0.342876	0.115709	0.020616	0	0
158	3	0.5206	0.5206	0.318894	0.11935	0.033987	0.007169	0
158	6	0.51592	0.51592	0.323896	0.117481	0.033494	0.009209	0
158	6	0.521831	0.521831	0.319111	0.118895	0.033085	0.007078	0
158	15	0.485275	0.485275	0.289038	0.107586	0.097393	0.020708	0
158	63	0.512007	0.512007	0.308906	0.12423	0.043301	0.011557	0
158	63	0.521696	0.521696	0.318071	0.117757	0.032459	0.010018	0
159	0	0.526487	0.526487	0.29039	0.122722	0.050479	0.009921	0
159	3	0.620641	0.620641	0.27764	0.091003	0.010716	0	0
159	3	0.539973	0.539973	0.328768	0.105388	0.025872	0	0
159	6	0.547444	0.547444	0.319147	0.107209	0.026201	0	0
159	6	0.541701	0.541701	0.317389	0.107116	0.028102	0.005691	0
159	63	0.525013	0.525013	0.304892	0.102779	0.053759	0.013556	0
159	63	0.430492	0.430492	0.250622	0.163412	0.099011	0.041719	0.014744
