# Supplementary material for: Heterogeneity of proteome dynamics between connective tissue phases of adult tendon
Source: eLife. 2020 May 12;9:e55262. doi: 10.7554/eLife.55262 (PMC7217697; doi:10.7554/eLife.55262)
Supplement: Figure 8—source data 1. [file elife-55262-fig8-data1.xlsx]

## Sheet: _BGN - IQAIELEDLLR
Days	FM	FM	FM
0	0.483092	0.490196	0.505051
3	0.452489	0.460829	0.465116
6	0.456621	0.458716	0.45045
15	0.373134	0.348432
63	0.32967	0.267677

## Sheet: _BGN - VVQC(+57.02)SDLG
Days	IFM	IFM	IFM	FM	FM	FM
0	0.543478			0.574713	0.537634	0.526316
3	0.49505			0.568182	0.578035	0.561798
6	0.515464	0.5
15	0.426009
63	0.219178			0.531915

## Sheet: _Nonlin fit of BGN - IQAIELEDLL
	FM
One phase decay
Best-fit values
Y0	0.4759
Plateau	0.1419
K	0.01441
Half Life	48.11
Tau	69.41
Span	0.334
95% CI (profile likelihood)
Y0	0.4521 to 0.5004
K	0.009311 to 0.02121
Half Life	32.68 to 74.44
Tau	47.15 to 107.4
Goodness of Fit
Degrees of Freedom	11
R squared	0.8468
Sum of Squares	0.009625
Sy.x	0.02958
Constraints
Plateau	Plateau = 0.141913
K	K > 0
Number of points
# of X values	15
# Y values analyzed	13

## Sheet: _Nonlin fit of BGN - VV
	IFM	FM
One phase decay
Best-fit values
Y0	0.5526	0.5581
Plateau	0.1939	0.1939
K	0.03184	0.001094
Half Life	21.77	633.8
Tau	31.4	914.4
Span	0.3587	0.3641
Std. Error
Y0	0.01544	0.009009
K	0.005566	0.001097
95% CI (profile likelihood)
Y0	0.5128 to 0.5958	0.5349 to 0.5812
K	0.02024 to 0.04877	??? to 0.004110
Half Life	14.21 to 34.24	168.7 to ???
Tau	20.50 to 49.40	243.3 to ???
Goodness of Fit
Degrees of Freedom	4	5
R squared	0.9712	0.1736
Sum of Squares	0.002056	0.002306
Sy.x	0.02267	0.02148
Constraints
Plateau	Plateau = 0.193929	Plateau = 0.193929
K	K > 0	K > 0
Number of points
# of X values	15	15
# Y values analyzed	6	7

## Sheet: _DCN - LHDNEITK
	IFM	IFM	IFM	FM	FM	FM
0	0.719424	0.591716		0.628931	0.628931	0.613497
3	0.595238			0.598802	0.578035	0.609756
6	0.628931	0.531915		0.552486	0.529101	0.568182
15	0.45045			0.452489	0.403226
63	0.240385			0.378788

## Sheet: _DCN - NSGIENGALQGM(+15.99)K
Days	IFM	IFM	IFM	FM	FM	FM
0	0.478469			0.507614	0.478469
3	0.45045			0.471698	0.478469
6	0.377358	0.393701		0.434783	0.458716	0.438596
15	0.258152			0.408163
63	0.141994	0.228947		0.14978

## Sheet: _DCN - M(+15.99)IVIELGG
	IFM	IFM	IFM	FM	FM	FM
0	0.465753			0.487805	0.483092	0.46729
3	0.469484	0.420168		0.460829	0.456621	0.456621
6	0.414938			0.438596	0.421941	0.421941
15	0.328859	0.324138		0.331126	0.306748
63	0.1469			0.229851

## Sheet: _DCN - STIQLGNY
Days	IFM	IFM	IFM	FM	FM	FM
0	0.628931	0.636943		0.617284	0.609756	0.598802
3	0.588235	0.578035		0.591716	0.591716	0.578035
6	0.558659	0.558659		0.574713	0.561798	0.561798
15	0.458716	0.440529		0.502513	0.452489
63	0.333333	0.35		0.344203	0.350181

## Sheet: _Nonlin fit of DCN - LHDNEITK
	IFM	FM
One phase decay
Best-fit values
Y0	0.6619	0.6206
Plateau	0.2443	0.2443
K	0.04556	0.03425
Half Life	15.21	20.24
Tau	21.95	29.2
Span	0.4176	0.3763
95% CI (profile likelihood)
Y0	0.5831 to 0.7471	0.5798 to 0.6650
K	0.01950 to 0.08917	0.01698 to 0.05856
Half Life	7.773 to 35.55	11.84 to 40.82
Tau	11.21 to 51.29	17.08 to 58.89
Goodness of Fit
Degrees of Freedom	5	10
R squared	0.8985	0.8235
Sum of Squares	0.01458	0.01484
Sy.x	0.054	0.03853
Constraints
Plateau	Plateau = 0.244282603	Plateau = 0.244282603
K	K > 0	K > 0
Number of points
# of X values	15	15
# Y values analyzed	7	12

## Sheet: _Nonlin fit of DCN - NSGIENGALQ
	IFM	FM
One phase decay
Best-fit values
Y0	0.4506	0.5023
Plateau	0.08671	0.08671
K	0.027	0.02454
Half Life	25.67	28.24
Tau	37.04	40.75
Span	0.3639	0.4156
95% CI (profile likelihood)
Y0	0.3715 to 0.5657	0.4807 to 0.5248
K	0.01082 to 0.08495	0.01867 to 0.03192
Half Life	8.160 to 64.05	21.71 to 37.13
Tau	11.77 to 92.41	31.33 to 53.57
Goodness of Fit
Degrees of Freedom	5	7
R squared	0.8623	0.97
Sum of Squares	0.01288	0.002761
Sy.x	0.05076	0.01986
Constraints
Plateau	Plateau = 0.086714638	Plateau = 0.086714638
K	K > 0	K > 0
Number of points
# of X values	15	15
# Y values analyzed	7	9

[truncated: 13 more sheets: _Nonlin fit of DCN - M(, _Nonlin fit of DCN - ST, _K values - DCN, DCN K values normality test, _Paired t test of K values - DC, _FMOD - LDGNEIKR, _FMOD - YLPFVPSR, _Nonlin fit of FMOD - L, _Nonlin fit of FMOD - Y, Col3a1 - GDAGPPGPQGLQ, Col3a1 - GLAGPPGMPGPR, Nonlin fit of Col3a1 - GDAGPPGP, Nonlin fit of Col3a1 - GLAGPPGM]
