# Supplementary material for: Heterogeneity of proteome dynamics between connective tissue phases of adult tendon
Source: eLife. 2020 May 12;9:e55262. doi: 10.7554/eLife.55262 (PMC7217697; doi:10.7554/eLife.55262)
Supplement: Source data 1. — ProTurn output for whole tendon. hl tab contains protein half-life information organized by peptide sequence and hl-data tab contains isotopomer relative abundance at each time point [file elife-55262-data1.xlsx]

## Sheet: hl
ID	Uniprot	Peptide	DP	z	mi	SS	a	pss	kp	N	k	dk	R2
0	P05371	ASGIIDTLFQDR	10	2	0	0.023943	0.473379	0.0558	0.7913	23	0.501172	0.189222	0.977452
1	P02564	ILNPAAIPEGQFIDSR	7	2	0	0.018918	0.369006	0.0558	0.7913	37	0.021558	0.005768	0.76695
2	P02466	GSPGEPGSAGPAGPP(15.9949)GLR	23	2	0	0.011384	0.412443	0.0558	0.7913	47	0.000161	0.000229	-0.293791
3	P02466	GQPGIAGALGEP(15.9949)GPLGIAGPP(15.9949)GAR	20	2	0	0.227017	0.287736	0.0558	0.7913	60	0.147656	0.345737	0.230746
4	P02466	GENGIVGPTGPVGAAGPSGPNGPP(15.9949)GPAGSR	23	3	0	0.007463	0.234957	0.0558	0.7913	69	0.000134	0.000275	-0.238838
5	P02466	GRVGAP(15.9949)GPAGAR	17	2	0	0.037737	0.544718	0.0558	0.7913	33	0.000211	0.000687	-0.414376
6	P02466	GETGNKGEP(15.9949)GSAGAQGPP(15.9949)GPSGEEGKR	23	4	0	0.012821	0.249779	0.0558	0.7913	68	0.000478	0.000473	0.054196
7	P02466	GP(15.9949)KGENGIVGPTGPVGAAGPSGPNGPP(15.9949)GPAGSR	4	4	0	0.006213	0.194409	0.0558	0.7913	75	0.002057	0.000721	0.763153
8	P02466	GP(15.9949)SGPQGIR	14	2	0	0.016595	0.607572	0.0558	0.7913	22	0.000623	0.000914	-0.452844
9	P02466	GAP(15.9949)GAIGAP(15.9949)GPAGASGDRGEAGAAGP(15.9949)SGPAGPR	11	4	0	0.04417	0.21254	0.0558	0.7913	93	0.000302	0.001814	-0.507511
10	P02466	GETGNKGEPGSAGAQGPP(15.9949)GPSGEEGKR	23	3	0	0.019514	0.255803	0.0558	0.7913	68	0.000363	0.000764	-0.326402
11	P02466	GVSAGPGPMGLMGPR	22	2	0	0.017035	0.427325	0.0558	0.7913	32	0.00166	0.00054	0.246
12	P02466	GEAGAVGAP(15.9949)GSAGASGPGGLP(15.9949)GER	23	3	0	0.017006	0.327436	0.0558	0.7913	64	0.000272	0.00046	-0.179702
13	P02466	GDGGPP(15.9949)GMTGFP(15.9949)GAAGR	23	2	0	0.020181	0.398936	0.0558	0.7913	37	0.000134	0.000385	-0.96955
14	P02466	RGSP(15.9949)GEPGSAGP(15.9949)AGPP(15.9949)GLR	20	3	0	0.021779	0.361776	0.0558	0.7913	50	0.000592	0.000528	0.021485
15	P02466	GPNGDAGRP(15.9949)GEPGLMGPR	23	3	0	0.01465	0.364549	0.0558	0.7913	43	0.000356	0.000351	-0.08581
16	P02466	GEVGPAGPNGFAGP(15.9949)AGSAGQP(15.9949)GAK	23	2	0	0.105859	0.303763	0.0558	0.7913	61	0.000287	0.003552	-0.145871
17	P02466	GEPGAP(15.9949)GENGTP(15.9949)GQAGAR	22	2	0	0.122421	0.401356	0.0558	0.7913	50	0.000928	0.00367	-0.015984
18	P02466	TGEIGASGP(15.9949)P(15.9949)GFAGEK	22	2	0	0.015881	0.417823	0.0558	0.7913	36	0.002873	0.000488	0.854286
19	P02466	GYP(15.9949)GNIGPTGAAGAP(15.9949)GPHGSVGPAGK	23	3	0	0.015306	0.26834	0.0558	0.7913	58	0.000867	0.000522	0.252687
20	P02466	GIP(15.9949)GPVGAAGATGPR	23	2	0	0.012883	0.47774	0.0558	0.7913	35	0.000577	0.000236	0.371689
21	P02466	DGNPGSDGPP(15.9949)GR	10	2	0	0.089338	0.540938	0.0558	0.7913	28	0.001294	0.002057	-0.080362
22	P02466	AGVM(15.9949)GP(15.9949)P(15.9949)GNR	14	2	0	0.040375	0.530533	0.0558	0.7913	22	0.001996	0.000935	0.063987
23	P02466	HGNRGEP(15.9949)GPAGSVGPVGAVGPR	23	4	0	0.011116	0.319176	0.0558	0.7913	53	0.002347	0.000425	0.844095
24	P02466	AGVM(15.9949)GPP(15.9949)GNR	23	2	0	0.039597	0.543327	0.0558	0.7913	22	5e-05	0.000754	-0.923207
25	P02466	GEP(15.9949)GAP(15.9949)GENGTP(15.9949)GQAGAR	22	2	0	0.02793	0.391905	0.0558	0.7913	50	0.000424	0.000586	-0.303114
26	P02466	NSIAYLDEETGR	13	2	0	0.099975	0.475235	0.0558	0.7913	26	0.00282	0.003621	-0.120974
27	P02466	GP(15.9949)AGP(15.9949)SGPIGK	16	2	0	0.068858	0.562068	0.0558	0.7913	24	0.00755	0.003001	0.513735
28	P02466	AGVMGP(15.9949)P(15.9949)GNR	10	2	0	0.036851	0.543327	0.0558	0.7913	22	0.000211	0.0008	-0.456391
29	P02466	GHNGLQGLP(15.9949)GLAGLHGDQGAP(15.9949)GPVGPAGPR	23	4	0	0.092352	0.202633	0.0558	0.7913	69	0.005292	0.007741	-0.183299
30	P02466	GSDGSVGPVGPAGPIGSAGPP(15.9949)GFP(15.9949)GAP(15.9949)GPK	19	2	0	0.01449	0.218532	0.0558	0.7913	66	0.000897	0.000773	0.196793
31	P02466	GEPGSAGAQGPP(15.9949)GPSGEEGKR	23	3	0	0.009669	0.347919	0.0558	0.7913	58	0.000256	0.000236	-0.005311
32	P02466	HGNRGEPGPAGSVGPVGAVGPR	23	4	0	0.01514	0.326872	0.0558	0.7913	53	0.001233	0.000566	0.46093
33	P02466	EMATQLAFMR	19	2	0	0.208495	0.470787	0.0558	0.7913	23	16383.3	4.98494e+08	-3.70317
34	P02466	GAPGP(15.9949)DGNNGAQGPP(15.9949)GPQGVQGGK	18	2	0	0.115394	0.302337	0.0558	0.7913	58	0.002393	0.005132	-0.072411
35	P02466	GPPGAVGSP(15.9949)GVNGAP(15.9949)GEAGR	23	2	0	0.034803	0.375102	0.0558	0.7913	50	0.000623	0.00093	-0.04633
36	P02466	GEAGAAGPSGP(15.9949)AGPR	21	2	0	0.015882	0.496977	0.0558	0.7913	44	0.001027	0.000341	0.605482
37	P02466	GLP(15.9949)GEFGLPGP(15.9949)AGPR	15	2	0	0.033102	0.416649	0.0558	0.7913	34	0.000111	0.00077	-0.536006
38	P02466	GP(15.9949)KGENGIVGPTGPVGAAGPSGPNGPP(15.9949)GPAGSR	23	3	0	0.081434	0.194409	0.0558	0.7913	75	0.001111	0.004607	-0.19565
39	P02466	GEP(15.9949)GPAGSVGPVGAVGPR	18	3	0	0.012125	0.408879	0.0558	0.7913	42	0.001309	0.000361	0.735686
40	P02466	GAP(15.9949)GAIGAP(15.9949)GPAGASGDRGEAGAAGPSGPAGPR	23	4	0	0.010057	0.217665	0.0558	0.7913	93	0.000188	0.000357	-0.429979
41	P02466	GPP(15.9949)GAVGSP(15.9949)GVNGAP(15.9949)GEAGR	23	2	0	0.023104	0.36627	0.0558	0.7913	50	2e-05	0.000443	-1.39411
42	P02466	GEAGAVGAP(15.9949)GSAGASGPGGLP(15.9949)GER	23	2	0	0.022068	0.327436	0.0558	0.7913	64	0.000157	0.000544	-0.552198
43	P02466	GEAGAAGP(15.9949)SGP(15.9949)AGPR	15	2	0	0.069718	0.485275	0.0558	0.7913	44	0.000317	0.001389	-0.307017
44	P02466	GPNGDAGRP(15.9949)GEPGLMGPR	18	2	0	0.04661	0.364549	0.0558	0.7913	43	0.003262	0.001601	-1.43246
45	P02466	GSPGEP(15.9949)GSAGP(15.9949)AGPP(15.9949)GLR	21	2	0	0.024155	0.393248	0.0558	0.7913	47	0.000401	0.000421	-0.670017
46	P02466	GPSGEPGTTGPP(15.9949)GTAGPQGLLGAP(15.9949)GILGLP(15.9949)GSR	23	2	0	0.010667	0.180509	0.0558	0.7913	69	0.0005	0.000618	0.106108
47	P02466	GEIGNPGR	12	2	0	0.080378	0.652761	0.0558	0.7913	19	0.009595	0.00684	-1.23367
48	P02466	GYP(15.9949)GNIGPTGAAGAP(15.9949)GPHGSVGPAGK	23	2	0	0.008729	0.26834	0.0558	0.7913	58	0.001096	0.000336	0.640612
49	P02466	GELGPVGNP(15.9949)GPAGP(15.9949)AGPR	23	2	0	0.025631	0.389087	0.0558	0.7913	44	0.000912	0.000575	0.135759
50	P02466	GAP(15.9949)GAIGAP(15.9949)GPAGASGDR	23	2	0	0.01813	0.426647	0.0558	0.7913	49	0.000294	0.000317	-0.341771
51	P02466	HGNRGEP(15.9949)GPAGSVGPVGAVGPR	23	3	0	0.012694	0.319176	0.0558	0.7913	53	0.001958	0.000515	0.729564
52	P02466	GENGIVGPTGPVGAAGPSGPNGP(15.9949)P(15.9949)GPAGSR	22	3	0	0.048132	0.229424	0.0558	0.7913	69	0.003094	0.002936	0.236432
53	P02466	SGHP(15.9949)GPVGPAGVR	23	3	0	0.010747	0.501737	0.0558	0.7913	30	0.001328	0.000278	0.789595
54	P02466	GEP(15.9949)GSAGAQGPP(15.9949)GPSGEEGKR	23	3	0	0.017313	0.339727	0.0558	0.7913	58	0.000577	0.000486	0.138479
55	P02466	GETGNKGEP(15.9949)GSAGAQGPP(15.9949)GPSGEEGK	23	3	0	0.015219	0.271509	0.0558	0.7913	65	0.00031	0.000508	-0.131645
56	P02466	GHNGLQGLP(15.9949)GLAGLHGDQGAP(15.9949)GPVGPAGPR	22	3	0	0.301821	0.202633	0.0558	0.7913	69	0.000256	0.015131	-0.140231
57	P02466	GENGIVGP(15.9949)TGPVGAAGPSGPNGPP(15.9949)GPAGSR	9	3	0	0.092896	0.229424	0.0558	0.7913	69	0.005872	0.007986	0.151643
58	P02466	GEPGSAGAQGP(15.9949)PGPSGEEGK	17	2	0	0.030642	0.378186	0.0558	0.7913	54	0.004414	0.001217	0.791281
59	P02466	HGNRGEPGPAGSVGPVGAVGPR	23	3	0	0.009936	0.326872	0.0558	0.7913	53	0.001023	0.000367	0.540211
60	P02466	GSTGPAGVRGPNGDAGRP(15.9949)GEP(15.9949)GLMGPR	4	3	0	0.576515	0.232914	0.0558	0.7913	63	0.219922	1.62901	-0.775376
61	P02466	EGPVGLPGIDGRPGP(15.9949)IGP(15.9949)AGPR	12	3	0	0.014917	0.294874	0.0558	0.7913	50	0.000516	0.000377	-0.019673
62	P02466	AGEDGHP(15.9949)GKP(15.9949)GRP(15.9949)GER	18	3	0	0.019092	0.387523	0.0558	0.7913	42	0.000722	0.000429	0.214996
63	P02466	GETGNKGEP(15.9949)GSAGAQGPP(15.9949)GPSGEEGKR	17	2	0	0.012008	0.249779	0.0558	0.7913	68	0.000455	0.000533	0.158382
64	P02466	GEP(15.9949)GPAGSVGPVGAVGPR	23	2	0	0.050765	0.408879	0.0558	0.7913	42	0.001401	0.001536	0.151512
65	P02466	EGPVGLP(15.9949)GIDGR	23	2	0	0.014067	0.51049	0.0558	0.7913	25	0.000558	0.000273	0.254873
66	P02466	GDGGPPGMTGFP(15.9949)GAAGR	23	2	0	0.128766	0.408557	0.0558	0.7913	37	0.000287	0.003674	-0.073853
67	P02466	GETGNKGEPGSAGAQGPP(15.9949)GPSGEEGK	23	3	0	0.014462	0.278056	0.0558	0.7913	65	0.000203	0.000481	-0.173326
68	P02466	GAP(15.9949)GAIGAP(15.9949)GPAGASGDRGEAGAAGPSGPAGPR	21	3	0	0.008013	0.217665	0.0558	0.7913	93	0.000356	0.000273	-0.001859
69	P02466	GQPGIAGALGEPGP(15.9949)LGIAGPP(15.9949)GAR	8	2	0	0.182285	0.287736	0.0558	0.7913	60	0.241406	0.521872	0.461439
70	P02466	GQPGIAGALGEPGPLGIAGP(15.9949)P(15.9949)GAR	12	3	0	0.123569	0.287736	0.0558	0.7913	60	8191.3	1.34881e+08	-130514
71	P02466	GP(15.9949)KGENGIVGPTGPVGAAGPSGPNGP(15.9949)P(15.9949)GPAGSR	11	4	0	0.367025	0.189831	0.0558	0.7913	75	0.003979	0.029323	-0.077393
72	P02466	GPNGDAGRP(15.9949)GEP(15.9949)GLMGPR	23	3	0	0.016502	0.355965	0.0558	0.7913	43	0.00034	0.000359	-0.317758
73	P02466	GEP(15.9949)GSAGAQGP(15.9949)P(15.9949)GPSGEEGKR	19	3	0	0.035551	0.331727	0.0558	0.7913	58	0.003011	0.001338	0.567238
74	P02466	SGHPGPVGPAGVR	23	3	0	0.010343	0.513836	0.0558	0.7913	30	0.001336	0.000288	0.735652
75	P02466	HGNRGEP(15.9949)GPAGSVGPVGAVGPR	14	2	0	0.030868	0.319176	0.0558	0.7913	53	0.000752	0.001	0.08289
76	P02466	FTYTVLVDGCSK	20	2	0	0.069737	0.445891	0.0558	0.7913	12	0.105664	0.098719	-1.00469
77	P02466	SGHP(15.9949)GPVGPAGVR	23	2	0	0.010825	0.501737	0.0558	0.7913	30	0.001324	0.000274	0.78923
78	P02466	GSP(15.9949)GEP(15.9949)GSAGPAGP(15.9949)PGLR	6	2	0	0.142317	0.393248	0.0558	0.7913	47	0.001721	0.004892	-0.206005
79	P02466	GEP(15.9949)GSAGAQGPP(15.9949)GPSGEEGKR	23	2	0	0.025469	0.339727	0.0558	0.7913	58	5.8e-05	0.000573	-0.900493
80	P02466	GATGLP(15.9949)GVAGAP(15.9949)GLP(15.9949)GPR	19	3	0	0.02546	0.387404	0.0558	0.7913	40	0.000485	0.000477	-0.569177
81	P02466	GEAGNIGFP(15.9949)GPK	23	2	0	0.011162	0.507938	0.0558	0.7913	25	0.000378	0.00021	0.146785
82	P02466	GEAGAAGPSGPAGPR	22	2	0	0.005563	0.508961	0.0558	0.7913	44	0.001008	0.000135	0.898896
83	P02466	GSP(15.9949)GEP(15.9949)GSAGPAGPP(15.9949)GLR	23	2	0	0.023055	0.393248	0.0558	0.7913	47	0.000371	0.000436	-0.431483
84	P02466	GAPGP(15.9949)DGNNGAQGP(15.9949)P(15.9949)GPQGVQGGK	22	3	0	0.095897	0.295218	0.0558	0.7913	58	0.001019	0.003866	0.016704
85	P02466	DGNP(15.9949)GSDGPP(15.9949)GRDGQP(15.9949)GHK	5	4	0	0.018441	0.347115	0.0558	0.7913	44	0.001462	0.0006	0.574965
86	P02466	PGPIGPAGPR	14	2	0	0.013947	0.590151	0.0558	0.7913	25	0.00015	0.000395	-0.392383
87	P02466	GP(15.9949)NGDAGRPGEP(15.9949)GLMGPR	9	2	0	0.098148	0.355965	0.0558	0.7913	43	0.004575	0.005064	0.319525
88	P02466	AGEDGHP(15.9949)GKPGRP(15.9949)GER	11	3	0	0.011781	0.396868	0.0558	0.7913	42	0.000935	0.000376	0.62323
89	P02466	TGEIGASGP(15.9949)PGFAGEK	7	2	0	0.198483	0.427899	0.0558	0.7913	36	0.89375	2.03968	-0.399137
90	P02466	GP(15.9949)AGPSGPIGK	23	2	0	0.028917	0.575622	0.0558	0.7913	24	0.000226	0.000503	-0.577178
91	P02466	HGNRGEPGPAGSVGPVGAVGPR	12	2	0	0.024804	0.326872	0.0558	0.7913	53	0.000432	0.00071	-0.116619
92	P02466	GELGPVGNP(15.9949)GPAGPAGPR	20	3	0	0.017276	0.39847	0.0558	0.7913	44	0.000569	0.000435	0.221489
93	P02466	GLP(15.9949)GEFGLP(15.9949)GP(15.9949)AGPR	21	3	0	0.043477	0.406839	0.0558	0.7913	34	0.001096	0.001064	-0.026391
94	P02466	GHP(15.9949)GLAGAR	13	2	0	0.017462	0.615006	0.0558	0.7913	24	0.000836	0.000859	-0.308534
95	P02466	DGNP(15.9949)GSDGPP(15.9949)GR	22	2	0	0.041123	0.5282	0.0558	0.7913	28	0.00047	0.000792	-0.326703
96	P02466	TGEIGASGPP(15.9949)GFAGEK	23	2	0	0.011514	0.427899	0.0558	0.7913	36	0.000325	0.000225	0.013185
97	P02466	GQPGIAGALGEPGPLGIAGPP(15.9949)GAR	23	3	0	0.109557	0.294675	0.0558	0.7913	60	8191.3	1.16974e+08	-19507.4
98	P02466	GAP(15.9949)GAIGAP(15.9949)GPAGASGDRGEAGAAGPSGPAGPR	17	2	0	0.013648	0.217665	0.0558	0.7913	93	0.000577	0.000616	0.037338
99	P02466	GEAGLP(15.9949)GLSGPVGP(15.9949)PGNP(15.9949)GANGLTGAK	5	2	0	0.114597	0.251664	0.0558	0.7913	57	0.068799	0.102268	-0.279831
100	P02466	GPSGDPGKP(15.9949)GEK	10	2	0	0.050864	0.528391	0.0558	0.7913	26	0.008679	0.010237	-0.070944
101	P02466	GEPGPAGSVGPVGAVGPR	23	3	0	0.008807	0.418739	0.0558	0.7913	42	0.000317	0.000208	0.248889
102	P02466	AGVMGPP(15.9949)GNR	23	2	0	0.106707	0.556429	0.0558	0.7913	22	0.001828	0.003301	0.070437
103	P02466	GP(15.9949)KGENGIVGPTGPVGAAGPSGPNGP(15.9949)P(15.9949)GPAGSR	17	3	0	0.065337	0.189831	0.0558	0.7913	75	1.90938	2.32711	-2.16515
104	P02466	GPNGDAGRP(15.9949)GEP(15.9949)GLMGPR	23	2	0	0.064914	0.355965	0.0558	0.7913	43	0.002911	0.002659	0.253941
105	P02466	SGHPGPVGPAGVR	20	2	0	0.016821	0.513836	0.0558	0.7913	30	0.001729	0.000494	0.682902
106	P02466	GLP(15.9949)GEFGLP(15.9949)GPAGPR	23	3	0	0.021564	0.416649	0.0558	0.7913	34	5e-06	0.000438	-1.04557
107	P02466	GEAGNIGFP(15.9949)GP(15.9949)K	17	2	0	0.009384	0.495978	0.0558	0.7913	25	0.00142	0.000281	0.807363
108	P02466	EGPVGLP(15.9949)GIDGRPGP(15.9949)IGP(15.9949)AGPR	8	3	0	0.01594	0.287931	0.0558	0.7913	50	0.000203	0.000617	0.017893
109	P02466	GQPGIAGALGEP(15.9949)GPLGIAGPP(15.9949)GAR	21	3	0	0.111851	0.287736	0.0558	0.7913	60	8191.3	1.22832e+08	-3723.54
110	P02466	GETGNKGEP(15.9949)GSAGAQGP(15.9949)P(15.9949)GPSGEEGKR	13	4	0	0.024672	0.243898	0.0558	0.7913	68	0.002942	0.001259	0.64399
111	P02466	GIPGP(15.9949)VGAAGATGPR	9	2	0	0.116489	0.47774	0.0558	0.7913	35	0.011548	0.013878	-0.008411
112	P02466	DGNP(15.9949)GSDGPP(15.9949)GRDGQP(15.9949)GHK	4	3	0	0.03287	0.347115	0.0558	0.7913	44	0.000386	0.001165	-0.074565
113	P02466	GLVGEP(15.9949)GPAGSK	23	2	0	0.014161	0.538793	0.0558	0.7913	26	0.000302	0.000236	-0.138342
114	P02466	EGPVGLP(15.9949)GIDGRPGPIGPAGPR	11	3	0	0.013068	0.301985	0.0558	0.7913	50	0.000493	0.000378	0.124904
115	P02466	GRVGAP(15.9949)GPAGAR	6	3	0	0.028583	0.544718	0.0558	0.7913	33	0.000592	0.000611	0.251597
116	P02466	GLP(15.9949)GSP(15.9949)GNVGPAGK	23	2	0	0.147896	0.485779	0.0558	0.7913	28	0.000165	0.003735	-0.154377
117	P02466	AGEDGHP(15.9949)GKPGRP(15.9949)GER	19	2	0	0.01426	0.396868	0.0558	0.7913	42	0.001111	0.000384	0.508331
118	P02466	GELGPVGNP(15.9949)GPAGPAGPR	23	2	0	0.010667	0.39847	0.0558	0.7913	44	0.000592	0.000223	0.427007
119	P02466	P(15.9949)GPIGPAGPR	23	2	0	0.0396	0.576255	0.0558	0.7913	25	0.000226	0.000852	-0.169371
120	P02466	GETGNKGEPGSAGAQGPP(15.9949)GPSGEEGKR	23	4	0	0.00906	0.255803	0.0558	0.7913	68	0.000172	0.000291	-0.286201
121	P02466	EGPVGLP(15.9949)GIDGRPGPIGP(15.9949)AGPR	13	2	0	0.019083	0.294874	0.0558	0.7913	50	0.000363	0.000579	-0.197842
122	P02466	GLP(15.9949)GEFGLP(15.9949)GP(15.9949)AGPR	23	2	0	0.024499	0.406839	0.0558	0.7913	34	0.000584	0.000497	-0.201749
123	P02466	RGSP(15.9949)GEP(15.9949)GSAGPAGPP(15.9949)GLR	7	3	0	0.027255	0.361776	0.0558	0.7913	50	0.000394	0.000551	-0.750678
124	P02466	GDGGP(15.9949)P(15.9949)GMTGFP(15.9949)GAAGR	17	2	0	0.02797	0.389543	0.0558	0.7913	37	1.2e-05	0.000489	-2.02469
125	P02466	GYP(15.9949)GNIGPTGAAGAP(15.9949)GPHGSVGPAGK	23	4	0	0.023154	0.26834	0.0558	0.7913	58	0.000432	0.000814	-0.146096
126	P02466	RGSP(15.9949)GEPGSAGPAGPP(15.9949)GLR	22	2	0	0.037739	0.3705	0.0558	0.7913	50	0.00092	0.00118	0.120474
127	P02466	GIP(15.9949)GPVGAAGATGPR	23	3	0	0.015076	0.47774	0.0558	0.7913	35	0.00047	0.00028	0.153695
128	P02466	GQPGIAGALGEP(15.9949)GPLGIAGP(15.9949)PGAR	7	2	0	0.233027	0.287736	0.0558	0.7913	60	0.304883	0.809853	0.210398
129	P02466	GQPGIAGALGEPGPLGIAGP(15.9949)PGAR	17	2	0	0.127958	0.294675	0.0558	0.7913	60	4095.3	3.3845e+07	-658955
130	P02466	GQPGIAGALGEPGPLGIAGPP(15.9949)GAR	22	2	0	0.112196	0.294675	0.0558	0.7913	60	8191.3	1.19896e+08	-421626
131	P02466	GSP(15.9949)GEPGSAGP(15.9949)AGPP(15.9949)GLR	22	2	0	0.023591	0.393248	0.0558	0.7913	47	0.000363	0.00043	-0.549486
132	P02466	RGSPGEPGSAGPAGPP(15.9949)GLR	18	3	0	0.027935	0.379435	0.0558	0.7913	50	0.002019	0.00097	0.185768
133	P02466	GEPGPAGSVGPVGAVGPR	23	2	0	0.004952	0.418739	0.0558	0.7913	42	0.000554	0.00012	0.753764
134	P02466	GEVGPAGPNGFAGP(15.9949)AGSAGQP(15.9949)GAKGEK	22	3	0	0.074826	0.256179	0.0558	0.7913	67	0.002484	0.003938	0.09861
135	P02466	GAP(15.9949)GPDGNNGAQGPP(15.9949)GPQGVQGGK	12	2	0	0.117701	0.302337	0.0558	0.7913	58	0.003308	0.005941	0.049753
136	P02466	GP(15.9949)KGENGIVGPTGPVGAAGP(15.9949)SGPNGPP(15.9949)GPAGSR	10	3	0	0.055858	0.189831	0.0558	0.7913	75	0.003094	0.004096	-0.573199
137	P02466	GLP(15.9949)GEFGLP(15.9949)GPAGPR	23	2	0	0.020132	0.416649	0.0558	0.7913	34	0.000272	0.000387	-0.560806
138	P02466	GLVGEP(15.9949)GPAGSKGETGNK	21	3	0	0.021189	0.39614	0.0558	0.7913	36	0.000203	0.00056	-0.175064
139	P02466	GPSGEP(15.9949)GTTGPPGTAGPQGLLGAP(15.9949)GILGLP(15.9949)GSR	8	3	0	0.028388	0.180509	0.0558	0.7913	69	0.000745	0.001829	0.097527
140	P02466	GP(15.9949)KGENGIVGPTGPVGAAGPSGPNGP(15.9949)PGPAGSR	20	4	0	0.041023	0.194409	0.0558	0.7913	75	0.002637	0.002838	0.211306
141	P13941	GRP(15.9949)GLP(15.9949)GAAGAR	19	2	0	0.032606	0.52604	0.0558	0.7913	33	0.001721	0.000863	0.483483
142	P13941	NGETGPQGPP(15.9949)GP(15.9949)TGAPGDK	14	2	0	0.031989	0.371045	0.0558	0.7913	42	0.001706	0.001133	0.413997
143	P13941	GEGGPP(15.9949)GAAGPP(15.9949)GGSGPAGPP(15.9949)GPQGVK	19	2	0	0.036771	0.27121	0.0558	0.7913	67	0.000745	0.00128	-0.147408
144	P13941	GPVGPHGPPGK	23	3	0	0.021011	0.561204	0.0558	0.7913	23	0.002393	0.000673	0.69537
145	P13941	GPP(15.9949)GAQGPP(15.9949)GSPGPLGIAGLTGAR	19	3	0	0.01315	0.294172	0.0558	0.7913	56	0.001828	0.000475	0.650578
146	P13941	DGPP(15.9949)GPAGNSGSP(15.9949)GNP(15.9949)GVAGPK	23	2	0	0.02388	0.330857	0.0558	0.7913	50	0.000996	0.000669	0.175767
147	P13941	NGDRGETGPAGPSGAP(15.9949)GPAGAR	19	2	0	0.102268	0.344934	0.0558	0.7913	58	0.000104	0.002556	-0.584509
148	P13941	GPVGPHGP(15.9949)PGK	5	3	0	0.014678	0.54799	0.0558	0.7913	23	0.002377	0.001225	0.635013
149	P13941	GSP(15.9949)GPQGIK	10	2	0	0.02248	0.612044	0.0558	0.7913	19	0.000241	0.001273	-1.06617
150	P13941	GVAGEP(15.9949)GRDGTP(15.9949)GGP(15.9949)GIR	11	2	0	0.035499	0.379531	0.0558	0.7913	41	0.001431	0.000969	0.334196
151	P13941	GGP(15.9949)GGP(15.9949)GLP(15.9949)GPAGK	23	2	0	0.032569	0.494497	0.0558	0.7913	30	0.00105	0.000604	0.119748
152	P13941	GPP(15.9949)GTAGTP(15.9949)GLR	18	2	0	0.024737	0.523508	0.0558	0.7913	24	0.001523	0.000481	0.468132
153	P13941	GEMGPAGIP(15.9949)GAP(15.9949)GLLGAR	11	2	0	0.030509	0.367862	0.0558	0.7913	43	0.001492	0.00083	0.282286
154	P13941	GEGGAP(15.9949)GLP(15.9949)GIAGPR	16	2	0	0.034129	0.460261	0.0558	0.7913	37	0.001309	0.000687	0.10944
155	P13941	GEDGKDGSP(15.9949)GEP(15.9949)GANGVPGNP(15.9949)GER	20	3	0	0.015997	0.281529	0.0558	0.7913	57	0.000943	0.000673	0.143798
156	P13941	GPVGPHGP(15.9949)P(15.9949)GK	12	3	0	0.038705	0.535086	0.0558	0.7913	23	0.003995	0.001333	0.61806
157	P13941	GPVGPHGPPGK	23	2	0	0.027978	0.561204	0.0558	0.7913	23	0.000455	0.000473	-0.36509
158	P13941	DGSSGHP(15.9949)GPIGPP(15.9949)GPR	7	3	0	0.019966	0.418308	0.0558	0.7913	38	0.002545	0.001162	0.067754
159	P13941	GPP(15.9949)GAQGPP(15.9949)GSPGPLGIAGLTGAR	23	2	0	0.016259	0.294172	0.0558	0.7913	56	0.001927	0.000603	0.642515
160	P13941	GSP(15.9949)GP(15.9949)QGIKGESGKP(15.9949)GASGHNGER	23	4	0	0.019122	0.274965	0.0558	0.7913	58	0.002652	0.000845	0.663285
161	P13941	GSP(15.9949)GGP(15.9949)GAAGFP(15.9949)GGR	23	2	0	0.028641	0.465695	0.0558	0.7913	37	0.001324	0.000538	0.360575
162	P13941	GP(15.9949)P(15.9949)GPAGANGAP(15.9949)GQR	23	2	0	0.052171	0.456119	0.0558	0.7913	42	0.003537	0.001628	0.529927
163	P13941	GP(15.9949)PGAQGPP(15.9949)GSP(15.9949)GPLGIAGLTGAR	22	3	0	0.017736	0.287245	0.0558	0.7913	56	0.001736	0.000562	0.5666
164	P13941	GPVGPHGPP(15.9949)GK	17	3	0	0.017489	0.54799	0.0558	0.7913	23	0.00256	0.000457	0.830313
165	P13941	GPVGPHGP(15.9949)P(15.9949)GK	19	2	0	0.039479	0.535086	0.0558	0.7913	23	0.003293	0.001186	0.62919
166	P13941	DGP(15.9949)PGPAGNSGSP(15.9949)GNP(15.9949)GVAGPK	13	3	0	0.021413	0.330857	0.0558	0.7913	50	0.00089	0.000615	0.195519
167	P13941	DGSSGHP(15.9949)GPIGPPGP(15.9949)R	13	3	0	0.014573	0.418308	0.0558	0.7913	38	0.002538	0.000507	0.851256
168	P13941	GEAGAP(15.9949)GVP(15.9949)GGKGDSGAP(15.9949)GER	23	3	0	0.026415	0.34967	0.0558	0.7913	53	0.001469	0.000722	0.368458
169	P13941	GPP(15.9949)GAQGPP(15.9949)GSP(15.9949)GPLGIAGLTGAR	23	2	0	0.020301	0.287245	0.0558	0.7913	56	0.001508	0.000605	0.410685
170	P13941	GLAGPP(15.9949)GM(15.9949)P(15.9949)GPR	19	2	0	0.063227	0.477366	0.0558	0.7913	28	0.000348	0.001037	-1.40956
171	P13941	DGSSGHP(15.9949)GPIGP(15.9949)PGPR	12	2	0	0.044433	0.418308	0.0558	0.7913	38	0.004025	0.001654	0.623443
172	P13941	GEM(15.9949)GPAGIP(15.9949)GAP(15.9949)GLLGAR	23	2	0	0.033793	0.3592	0.0558	0.7913	43	0.00105	0.000818	-0.017015
173	P13941	DGSSGHP(15.9949)GPIGPP(15.9949)GPR	8	2	0	0.044829	0.418308	0.0558	0.7913	38	0.00372	0.001254	0.648812
174	P13941	GEAGSP(15.9949)GIP(15.9949)GPK	23	2	0	0.026177	0.526106	0.0558	0.7913	28	0.001225	0.000494	0.389852
175	P13941	GEVGPAGSP(15.9949)GSNGSP(15.9949)GQR	18	3	0	0.04209	0.40582	0.0558	0.7913	46	0.002042	0.001197	0.278825
176	P13941	GPAGPNGAP(15.9949)GEK	23	2	0	0.024653	0.548828	0.0558	0.7913	30	0.000905	0.000482	0.313557
177	P13941	GEAGAP(15.9949)GVPGGK	23	2	0	0.029179	0.56451	0.0558	0.7913	29	0.000966	0.000542	0.255277
178	P13941	GSP(15.9949)GPQGIKGESGKP(15.9949)GASGHNGER	7	4	0	0.028883	0.281596	0.0558	0.7913	58	0.001942	0.001345	0.396522
179	P13941	GSP(15.9949)GP(15.9949)QGIKGESGKP(15.9949)GASGHNGER	8	3	0	0.013571	0.274965	0.0558	0.7913	58	0.002286	0.000701	0.747447
180	P13941	GENGSP(15.9949)GAPGAP(15.9949)GHPGPP(15.9949)GPVGPSGK	7	3	0	0.048479	0.267245	0.0558	0.7913	62	0.003674	0.003634	0.188502
181	P13941	NGETGPQGPP(15.9949)GPTGAP(15.9949)GDK	5	2	0	0.218807	0.371045	0.0558	0.7913	42	0.000989	0.021982	-0.313464
182	P13941	GEKGEP(15.9949)GGAGADGVPGK	13	3	0	0.044231	0.438059	0.0558	0.7913	39	0.000523	0.000959	-0.187546
183	P13941	GLAGP(15.9949)P(15.9949)GMP(15.9949)GPR	21	2	0	0.087101	0.477366	0.0558	0.7913	28	0.000546	0.001729	-0.756062
184	P13941	GEAGAP(15.9949)GVP(15.9949)GGK	23	2	0	0.036138	0.551217	0.0558	0.7913	29	0.001164	0.00065	0.199054
185	P13941	GPP(15.9949)GPAGANGAP(15.9949)GQR	23	2	0	0.02631	0.467118	0.0558	0.7913	42	0.001302	0.000519	0.431756
186	P13941	GEP(15.9949)GGAGADGVP(15.9949)GK	20	2	0	0.035484	0.507196	0.0558	0.7913	32	0.001088	0.000679	0.097264
187	P13941	GEAGAP(15.9949)GVPGGKGDSGAP(15.9949)GER	4	3	0	0.048675	0.358102	0.0558	0.7913	53	0.001294	0.026376	-0.443099
188	P13941	GPVGPHGPP(15.9949)GK	23	2	0	0.015383	0.54799	0.0558	0.7913	23	0.002309	0.000441	0.827241
189	P13941	GPAGPIGPP(15.9949)GPAGQP(15.9949)GDK	23	2	0	0.035402	0.391951	0.0558	0.7913	43	0.000462	0.000847	-0.249151
190	P13941	GEAGAP(15.9949)GVP(15.9949)GGKGDSGAP(15.9949)GER	7	2	0	0.057588	0.34967	0.0558	0.7913	53	0.00015	0.001926	-0.017992
191	P13941	GENGLP(15.9949)GDNGAP(15.9949)GPMGPR	23	2	0	0.095872	0.365734	0.0558	0.7913	41	0.001416	0.003448	-0.009296
192	P13941	GEVGPAGSP(15.9949)GSNGSP(15.9949)GQR	23	2	0	0.016557	0.40582	0.0558	0.7913	46	0.001767	0.000425	0.722588
193	P13941	GGP(15.9949)GGPGLP(15.9949)GPAGK	23	2	0	0.0381	0.506421	0.0558	0.7913	30	0.003468	0.001339	0.577958
194	P13941	GETGPAGPSGAP(15.9949)GPAGAR	23	2	0	0.018898	0.431101	0.0558	0.7913	49	0.002255	0.000527	0.76732
195	P13941	P(15.9949)GPP(15.9949)GPSGPR	14	2	0	0.069099	0.56759	0.0558	0.7913	25	0.028455	0.010533	-0.094621
196	P13941	GPAGIP(15.9949)GFP(15.9949)GM(15.9949)K	15	2	0	0.052183	0.460068	0.0558	0.7913	23	0.007092	0.002507	-0.174708
197	P13941	GPAGPNGAP(15.9949)GEKGPAGER	21	3	0	0.234836	0.403962	0.0558	0.7913	48	0.000348	0.006612	-0.020061
198	P13941	GRP(15.9949)GLP(15.9949)GAAGAR	23	3	0	0.036076	0.52604	0.0558	0.7913	33	0.001698	0.000944	0.410529
199	P13941	DGSSGHP(15.9949)GPIGP(15.9949)PGP(15.9949)R	18	3	0	0.072599	0.408458	0.0558	0.7913	38	0.002301	0.001919	0.052431
200	P13941	DGSSGHPGPIGPPGP(15.9949)R	23	3	0	0.021943	0.428395	0.0558	0.7913	38	0.00192	0.000644	0.628258
201	P13941	GPAGPNGAP(15.9949)GEKGP(15.9949)AGER	20	3	0	0.239802	0.39445	0.0558	0.7913	48	16383.3	6.86939e+08	-1.97438
202	P13941	GEGGPP(15.9949)GAAGPP(15.9949)GGSGPAGPP(15.9949)GPQGVK	19	3	0	0.016577	0.27121	0.0558	0.7913	67	0.001347	0.000609	0.498461
203	P13941	GPP(15.9949)GPQGLPGQP(15.9949)GTAGEP(15.9949)GR	22	2	0	0.045533	0.336937	0.0558	0.7913	50	0.000287	0.001089	-0.700567
204	P13941	NGDRGETGPAGPSGAP(15.9949)GPAGAR	23	3	0	0.012249	0.344934	0.0558	0.7913	58	0.002713	0.000445	0.870559
205	P13941	GVAGEP(15.9949)GRDGTP(15.9949)GGP(15.9949)GIR	11	3	0	0.020369	0.379531	0.0558	0.7913	41	0.001477	0.000726	0.508146
206	P13941	GEP(15.9949)GGAGADGVPGK	23	2	0	0.018556	0.519427	0.0558	0.7913	32	0.001504	0.000407	0.675858
207	P13941	GEMGPAGIP(15.9949)GAP(15.9949)GLLGAR	16	3	0	0.010869	0.367862	0.0558	0.7913	43	0.00269	0.000426	0.87127
208	P13941	GERGEAGSP(15.9949)GIP(15.9949)GPK	20	3	0	0.04375	0.440449	0.0558	0.7913	38	0.000523	0.001034	-0.126991
209	P13941	GEKGEP(15.9949)GGAGADGVP(15.9949)GK	18	3	0	0.038851	0.427744	0.0558	0.7913	39	0.002057	0.001097	0.466228
210	P13941	GLAGPP(15.9949)GMP(15.9949)GPR	23	2	0	0.017644	0.488878	0.0558	0.7913	28	0.001141	0.000359	0.53259
211	P13941	GEDGKDGSP(15.9949)GEP(15.9949)GANGVPGNPGER	7	3	0	0.055746	0.288318	0.0558	0.7913	57	0.010083	0.007569	-4.39157
212	P13941	GEPGGAGADGVP(15.9949)GK	5	2	0	0.334706	0.519427	0.0558	0.7913	32	0.354688	0.842698	-8.19632
213	P04466	NICYVITHGDAK	11	3	0	0.105411	0.451953	0.0558	0.7913	18	0.002408	0.004513	0.06095
214	P04466	NICYVITHGDAK	6	2	0	0.09525	0.451953	0.0558	0.7913	18	0.005902	0.006083	-0.62414
215	P04466	GADPEDVITGAFK	8	2	0	0.043631	0.475728	0.0558	0.7913	25	0.006818	0.002261	0.453468
216	P01946	MFAAFPTTK	6	2	0	0.069242	0.523473	0.0558	0.7913	13	0.005444	0.008684	-0.092409
217	P01946	M(15.9949)FAAFPTTK	9	2	0	0.065197	0.511147	0.0558	0.7913	13	0.000745	0.007445	-0.356738
218	P48679	ITESEEVVSR	15	2	0	0.033157	0.540539	0.0558	0.7913	23	0.041699	0.010095	0.951781
219	P48679	EAALSTALSEK	11	2	0	0.191658	0.543819	0.0558	0.7913	27	0.008832	0.012993	0.202749
220	P48679	IRIDSLSAQLSQLQK	5	3	0	0.032525	0.388561	0.0558	0.7913	33	0.0146	0.02244	0.13948
221	P48679	TALINATGEEVAMR	14	2	0	0.043978	0.429891	0.0558	0.7913	31	0.008862	0.004722	0.330542
222	P48679	LKDLEALLNSK	9	3	0	0.029119	0.495307	0.0558	0.7913	18	0.024609	0.006772	0.9312
223	P48679	SGAQASSTPLSPTR	10	2	0	0.167833	0.483465	0.0558	0.7913	34	0.106152	0.109943	-1.48845
224	P48679	TLEGELHDLR	9	3	0	0.05725	0.521556	0.0558	0.7913	20	0.016064	0.012966	0.161023
225	P48679	NSNLVGAAHEELQQSR	12	3	0	0.030809	0.390108	0.0558	0.7913	43	0.028271	0.008975	0.651019
226	P48679	LKDLEALLNSK	8	2	0	0.062212	0.495307	0.0558	0.7913	18	0.034131	0.016725	0.760784
227	P48679	LRDLEDSLAR	17	3	0	0.098778	0.525427	0.0558	0.7913	23	0.018933	0.013709	0.551511
228	P48679	QLQDEMLR	8	2	0	0.103454	0.549332	0.0558	0.7913	19	0.044873	0.029617	0.751209
229	P48679	NIYSEELR	10	2	0	0.060632	0.5662	0.0558	0.7913	18	0.026624	0.009872	0.788881
230	P48679	LEAALGEAK	11	2	0	0.156656	0.60568	0.0558	0.7913	24	0.010571	0.015165	0.080755
231	P48679	LRDLEDSLAR	7	2	0	0.086274	0.525427	0.0558	0.7913	23	0.156934	0.138597	0.853593
232	P48679	IDSLSAQLSQLQK	13	2	0	0.029067	0.454083	0.0558	0.7913	29	0.037061	0.008189	0.96063
233	P02454	DGLNGLP(15.9949)GPIGP(15.9949)P(15.9949)GPR	13	3	0	0.054575	0.393152	0.0558	0.7913	33	4.3e-05	0.001731	-0.016487
234	P02454	GFP(15.9949)GADGVAGPKGPAGER	12	3	0	0.050483	0.388824	0.0558	0.7913	43	5.8e-05	0.00135	-0.253419
235	P02454	GPSGPQGP(15.9949)SGAP(15.9949)GP(15.9949)K	23	2	0	0.024522	0.455006	0.0558	0.7913	37	0.000951	0.000569	0.292207
236	P02454	QGPSGASGER	16	2	0	0.10689	0.614066	0.0558	0.7913	29	0.001843	0.002636	0.0921
237	P02454	GEPGPPGP(15.9949)AGFAGPP(15.9949)GADGQP(15.9949)GAK	17	3	0	0.016896	0.284816	0.0558	0.7913	61	0.000325	0.000466	-0.269399
238	P02454	GANGAP(15.9949)GIAGAP(15.9949)GFP(15.9949)GAR	23	2	0	0.024466	0.390279	0.0558	0.7913	47	1.2e-05	0.000447	-1.40708
239	P02454	GVP(15.9949)GPP(15.9949)GAVGPAGK	23	2	0	0.020592	0.489893	0.0558	0.7913	30	0.000279	0.00035	-0.494335
240	P02454	GEP(15.9949)GSP(15.9949)GENGAP(15.9949)GQMGPR	23	2	0	0.050294	0.360234	0.0558	0.7913	48	0.000485	0.001617	0.018867
241	P02454	GPP(15.9949)GPMGPPGLAGPPGESGR	14	2	0	0.012324	0.343652	0.0558	0.7913	48	0.00121	0.000408	0.697536
242	P02454	GEPGPSGLP(15.9949)GP(15.9949)P(15.9949)GER	22	2	0	0.025316	0.42691	0.0558	0.7913	38	0.00031	0.000438	-0.717806
243	P02454	GEP(15.9949)GPSGLP(15.9949)GPP(15.9949)GER	21	2	0	0.02593	0.42691	0.0558	0.7913	38	0.000294	0.000429	-0.903751
244	P02454	SGEYWIDPNQGCNLDAIK	7	2	0	0.075573	0.307197	0.0558	0.7913	34	0.358594	0.296591	-0.012237
245	P02454	GPSGPQGPSGAP(15.9949)GP(15.9949)KGNSGEPGAP(15.9949)GNKGDTGAK	19	4	0	0.013903	0.194375	0.0558	0.7913	76	0.000127	0.000672	-0.209688
246	P02454	GEP(15.9949)GPAGVQGPP(15.9949)GPAGEEGK	23	2	0	0.011993	0.354986	0.0558	0.7913	52	0.000691	0.000295	0.407705
247	P02454	GDAGP(15.9949)PGPAGPAGPPGPIGNVGAP(15.9949)GPK	4	3	0	0.020205	0.263434	0.0558	0.7913	64	0.002637	0.000971	0.748342
248	P02454	EDLDCPNPQKR	7	2	0	0.05685	0.473642	0.0558	0.7913	25	0.005902	0.002967	0.126467
249	P02454	GAAGLP(15.9949)GPK	23	2	0	0.017265	0.631034	0.0558	0.7913	21	0.000169	0.000266	-0.631814
250	P02454	GETGPAGPAGPIGPAGAR	20	2	0	0.006301	0.428106	0.0558	0.7913	47	0.000905	0.000176	0.823467
251	P02454	GEPGDTGVKGDAGPP(15.9949)GPAGPAGPP(15.9949)GPIGNVGAP(15.9949)GPK	21	4	0	0.014503	0.162847	0.0558	0.7913	80	0.000195	0.000718	-0.52283
252	P02454	NGDRGETGPAGPAGPIGPAGAR	23	2	0	0.007104	0.342538	0.0558	0.7913	57	0.001149	0.00024	0.795617
253	P02454	GVQGPP(15.9949)GPAGPR	23	2	0	0.038416	0.529554	0.0558	0.7913	31	0.000531	0.000826	-0.052032
254	P02454	GAAGLP(15.9949)GP(15.9949)KGDR	23	3	0	0.026452	0.521592	0.0558	0.7913	28	0.000516	0.000487	-0.141197
255	P02454	GAAGLP(15.9949)GP(15.9949)KGDRGDAGPK	21	3	0	0.014605	0.391042	0.0558	0.7913	41	0.000554	0.000327	0.218902
256	P02454	GLP(15.9949)GTAGLP(15.9949)GM(15.9949)KGHR	23	3	0	0.025797	0.396192	0.0558	0.7913	29	0.000287	0.000559	-0.716802
257	P02454	GP(15.9949)SGPQGPSGAP(15.9949)GPK	23	2	0	0.016906	0.465978	0.0558	0.7913	37	0.000592	0.000302	0.200516
258	P02454	GLTGPIGPP(15.9949)GPAGAP(15.9949)GDKGETGPSGPAGPTGAR	23	3	0	0.009928	0.195374	0.0558	0.7913	74	2.7e-05	0.000353	-1.19908
259	P02454	DGEAGAQGAP(15.9949)GPAGPAGER	23	2	0	0.009296	0.401085	0.0558	0.7913	57	0.000687	0.000191	0.60196
260	P02454	GLTGSP(15.9949)GSPGP(15.9949)DGK	12	2	0	0.072257	0.489475	0.0558	0.7913	27	0.002332	0.002164	-1.01533
261	P02454	P(15.9949)GEQGVPGDLGAP(15.9949)GPSGAR	20	2	0	0.03162	0.371453	0.0558	0.7913	48	0.001752	0.001065	0.401521
262	P02454	GETGPAGP(15.9949)PGAP(15.9949)GAPGAP(15.9949)GPVGPAGK	8	3	0	0.006433	0.280652	0.0558	0.7913	65	0.001008	0.000265	0.787165
263	P02454	SAGVSVPGPMGP(15.9949)SGPR	15	2	0	0.011017	0.42023	0.0558	0.7913	36	0.000966	0.000339	0.59929
264	P02454	DGLNGLP(15.9949)GPIGP(15.9949)PGP(15.9949)R	22	3	0	0.199266	0.393152	0.0558	0.7913	33	0.013867	0.021605	-0.490814
265	P02454	GFP(15.9949)GADGVAGP(15.9949)KGPAGER	23	3	0	0.018748	0.379668	0.0558	0.7913	43	0.00105	0.000484	0.400578
266	P02454	GPPGPMGPPGLAGPPGESGR	9	3	0	0.030516	0.351939	0.0558	0.7913	48	0.002103	0.001225	0.347726
267	P02454	GNSGEPGAP(15.9949)GNKGDTGAK	18	3	0	0.013339	0.41614	0.0558	0.7913	39	0.000478	0.000263	0.085865
268	P02454	GQAGVMGFP(15.9949)GP(15.9949)KGTAGEPGK	22	3	0	0.015622	0.323835	0.0558	0.7913	41	0.000638	0.000479	0.1756
269	P02454	GPPGPM(15.9949)GPP(15.9949)GLAGPPGESGR	8	3	0	0.015684	0.33556	0.0558	0.7913	48	0.000157	0.00041	-0.411733
270	P02454	DGLNGLPGPIGP(15.9949)P(15.9949)GPR	19	2	0	0.030763	0.402632	0.0558	0.7913	33	0.002209	0.001081	0.41833
271	P02454	QGPSGASGERGPP(15.9949)GPMGPP(15.9949)GLAGPP(15.9949)GESGR	16	3	0	0.018329	0.201684	0.0558	0.7913	78	0.00018	0.000777	-0.443106
272	P02454	GDRGETGPAGPP(15.9949)GAPGAPGAP(15.9949)GPVGPAGK	20	3	0	0.017208	0.243301	0.0558	0.7913	72	0.001134	0.00069	0.303056
273	P02454	GDRGDAGP(15.9949)KGADGSP(15.9949)GKDGVR	17	4	0	0.041736	0.33601	0.0558	0.7913	46	0.002026	0.001613	-0.186946
274	P02454	TGPP(15.9949)GPAGQDGRPGPAGPP(15.9949)GAR	20	3	0	0.019952	0.320977	0.0558	0.7913	57	0.001393	0.000672	0.482059
275	P02454	GVP(15.9949)GPPGAVGPAGK	23	2	0	0.022597	0.501706	0.0558	0.7913	30	0.001935	0.000595	0.658592
276	P02454	GFP(15.9949)GADGVAGPK	23	2	0	0.022442	0.528262	0.0558	0.7913	25	0.000119	0.000436	-0.583972
277	P02454	GLTGPIGPP(15.9949)GPAGAPGDKGETGPSGPAGPTGAR	15	4	0	0.013623	0.200085	0.0558	0.7913	74	0.000272	0.000742	0.042279
278	P02454	TGPP(15.9949)GPAGQDGR	23	2	0	0.016552	0.537543	0.0558	0.7913	29	0.000249	0.000265	-0.342524
279	P02454	GFSGLQGPP(15.9949)GSP(15.9949)GSPGEQGPSGASGPAGPR	23	3	0	0.011137	0.220881	0.0558	0.7913	76	0.000516	0.000391	-0.002956
280	P02454	GEPGP(15.9949)AGVQGPP(15.9949)GPAGEEGKR	23	3	0	0.012209	0.326576	0.0558	0.7913	56	0.000905	0.000301	0.494074
281	P02454	GPSGPQGPSGAP(15.9949)GP(15.9949)KGNSGEPGAP(15.9949)GNKGDTGAK	8	3	0	0.017713	0.194375	0.0558	0.7913	76	0.001126	0.00112	0.199274
282	P02454	NGDDGEAGKPGRP(15.9949)GER	14	3	0	0.146994	0.418691	0.0558	0.7913	40	3.925	10.7281	-0.364525
283	P02454	GRP(15.9949)GPP(15.9949)GSAGAR	23	3	0	0.022975	0.530625	0.0558	0.7913	33	0.000172	0.00034	-0.812637
284	P02454	SAGVSVPGPMGPSGPR	23	2	0	0.010738	0.430364	0.0558	0.7913	36	0.001138	0.000325	0.555685
285	P02454	GSP(15.9949)GPAGP(15.9949)KGSP(15.9949)GEAGR	20	3	0	0.036255	0.416601	0.0558	0.7913	44	0.000386	0.001019	0.034935
286	P02454	GAAGLP(15.9949)GP(15.9949)KGDR	23	2	0	0.023413	0.521592	0.0558	0.7913	28	0.000493	0.000401	-0.14616
287	P02454	GPSGP(15.9949)QGPSGAP(15.9949)GPK	7	2	0	0.09293	0.465978	0.0558	0.7913	37	0.001035	0.002308	-0.177722
288	P02454	GAAGLP(15.9949)GP(15.9949)KGDRGDAGPK	19	2	0	0.025849	0.391042	0.0558	0.7913	41	0.000302	0.000558	-0.485193
289	P02454	GLP(15.9949)GTAGLP(15.9949)GM(15.9949)KGHR	22	2	0	0.031871	0.396192	0.0558	0.7913	29	8.1e-05	0.000751	-0.819142
290	P02454	GSPGADGPAGSP(15.9949)GTPGPQGIAGQR	23	3	0	0.013083	0.314222	0.0558	0.7913	61	0.001035	0.00042	0.509444
291	P02454	DGEAGAQGAP(15.9949)GPAGP(15.9949)AGER	18	2	0	0.047283	0.39164	0.0558	0.7913	57	4.3e-05	0.001223	-0.154126
292	P02454	GLTGPIGPP(15.9949)GPAGAP(15.9949)GDKGETGPSGPAGPTGAR	23	2	0	0.01389	0.195374	0.0558	0.7913	74	0.000821	0.000766	0.189978
293	P02454	EGSP(15.9949)GAEGSP(15.9949)GR	8	2	0	0.037723	0.536037	0.0558	0.7913	34	2e-05	0.000599	-1.21272
294	P02454	GDTGAKGEP(15.9949)GP(15.9949)AGVQGPP(15.9949)GPAGEEGKR	21	4	0	0.015826	0.241156	0.0558	0.7913	66	0.001279	0.000645	0.349968
295	P02454	GLTGPIGPP(15.9949)GPAGAP(15.9949)GDKGETGP(15.9949)SGPAGPTGAR	7	4	0	0.012692	0.190774	0.0558	0.7913	74	0.002271	0.000834	-0.972417
296	P02454	GPPGPMGPPGLAGPP(15.9949)GESGR	18	3	0	0.026916	0.343652	0.0558	0.7913	48	0.002362	0.001082	0.537719
297	P02454	GFP(15.9949)GADGVAGP(15.9949)KGPAGER	23	2	0	0.031266	0.379668	0.0558	0.7913	43	0.001035	0.00093	0.179732
298	P02454	GPPGPMGPPGLAGPPGESGR	23	2	0	0.037206	0.351939	0.0558	0.7913	48	0.001118	0.001074	0.07516
299	P02454	GNSGEPGAP(15.9949)GNKGDTGAK	21	2	0	0.012125	0.41614	0.0558	0.7913	39	0.000367	0.000242	0.097268
300	P02454	NGDRGETGPAGP(15.9949)AGPIGPAGAR	23	3	0	0.010916	0.334472	0.0558	0.7913	57	0.000951	0.000318	0.584457
301	P02454	GPSGPQGPSGAP(15.9949)GPK	23	2	0	0.01608	0.477215	0.0558	0.7913	37	6.6e-05	0.000358	-0.189443
302	P02454	GPPGP(15.9949)MGPPGLAGPP(15.9949)GESGR	21	3	0	0.015101	0.33556	0.0558	0.7913	48	0.000104	0.000351	-0.726747
303	P02454	GDAGP(15.9949)KGADGSP(15.9949)GKDGVR	22	4	0	0.022212	0.396941	0.0558	0.7913	39	0.001149	0.000557	0.380011
304	P02454	NGDDGEAGKP(15.9949)GRP(15.9949)GER	13	3	0	0.016992	0.408832	0.0558	0.7913	40	0.00015	0.000294	-1.24693
305	P02454	GPP(15.9949)GPMGPP(15.9949)GLAGP(15.9949)PGESGR	14	2	0	0.072832	0.327659	0.0558	0.7913	48	0.000562	0.002471	-0.075636
306	P02454	GDTGPAGP(15.9949)KGEPGSP(15.9949)GENGAP(15.9949)GQMGPR	23	3	0	0.013135	0.234272	0.0558	0.7913	66	0.000111	0.000401	-0.899928
307	P02454	GETGPAGP(15.9949)AGPIGPAGAR	23	2	0	0.017714	0.418025	0.0558	0.7913	47	0.000592	0.000384	0.18608
308	P02454	GPP(15.9949)GPP(15.9949)GKNGDDGEAGKPGRP(15.9949)GER	15	3	0	0.244323	0.265991	0.0558	0.7913	58	3.55	19.1642	-1.12824
309	P02454	GEP(15.9949)GPAGVQGPP(15.9949)GPAGEEGKR	10	3	0	0.013132	0.326576	0.0558	0.7913	56	0.000798	0.000314	0.425365
310	P02454	GPSGPQGP(15.9949)SGAP(15.9949)GPK	23	2	0	0.017662	0.465978	0.0558	0.7913	37	0.00039	0.000324	-0.075291
311	P02454	GP(15.9949)SGPQGP(15.9949)SGAP(15.9949)GPK	23	2	0	0.029527	0.455006	0.0558	0.7913	37	0.000943	0.000582	0.130677
312	P02454	GPP(15.9949)GPMGPP(15.9949)GLAGPPGESGR	23	2	0	0.016211	0.33556	0.0558	0.7913	48	0.000142	0.000354	-0.834361
313	P02454	GDRGDAGP(15.9949)KGADGSP(15.9949)GKDGVR	18	3	0	0.025323	0.33601	0.0558	0.7913	46	0.000699	0.000748	-0.003778
314	P02454	GFP(15.9949)GADGVAGP(15.9949)K	15	2	0	0.034353	0.515823	0.0558	0.7913	25	4.3e-05	0.000493	-2.40107
315	P02454	GLTGPIGPP(15.9949)GPAGAPGDK	23	2	0	0.015698	0.402877	0.0558	0.7913	38	0.001271	0.000461	0.006717
316	P02454	GSP(15.9949)GEAGRP(15.9949)GEAGLP(15.9949)GAK	22	2	0	0.02293	0.386577	0.0558	0.7913	47	8.1e-05	0.00051	-0.582088
317	P02454	GEPGP(15.9949)AGVQGPP(15.9949)GPAGEEGK	19	3	0	0.020504	0.354986	0.0558	0.7913	52	0.000951	0.000694	0.28862
318	P02454	GADGSP(15.9949)GKDGVR	12	2	0	0.200094	0.542228	0.0558	0.7913	26	0.006421	0.006959	-2.98097
319	P02454	VGP(15.9949)PGPSGNAGPP(15.9949)GPP(15.9949)GPVGK	11	3	0	0.096491	0.333576	0.0558	0.7913	45	0.003888	0.004603	0.159918
320	P02454	TGP(15.9949)P(15.9949)GPAGQDGR	19	2	0	0.023961	0.524886	0.0558	0.7913	29	0.000748	0.000502	0.265938
321	P02454	GPPGP(15.9949)MGPPGLAGPPGESGR	5	3	0	0.01055	0.343652	0.0558	0.7913	48	0.001782	0.000677	0.655202
322	P02454	GDTGPAGPKGEP(15.9949)GSP(15.9949)GENGAP(15.9949)GQMGPR	23	3	0	0.012469	0.234272	0.0558	0.7913	66	0.000752	0.000482	0.229094
323	P02454	GLTGPIGPP(15.9949)GPAGAPGDKGETGPSGPAGPTGAR	23	3	0	0.007714	0.200085	0.0558	0.7913	74	0.000394	0.000355	0.110536
324	P02454	GFSGLQGPP(15.9949)GSP(15.9949)GSPGEQGPSGASGPAGPR	23	2	0	0.01371	0.220881	0.0558	0.7913	76	1.2e-05	0.000545	-0.424792
325	P02454	GLTGPIGP(15.9949)P(15.9949)GPAGAP(15.9949)GDKGETGPSGPAGPTGAR	15	4	0	0.017245	0.190774	0.0558	0.7913	74	0.001614	0.001082	0.368815
326	P02454	GRP(15.9949)GPP(15.9949)GSAGAR	23	2	0	0.023641	0.530625	0.0558	0.7913	33	0.000157	0.000355	-0.832751
327	P02454	GPSGP(15.9949)QGPSGAPGP(15.9949)K	15	2	0	0.08612	0.465978	0.0558	0.7913	37	0.002057	0.002442	0.141042
328	P02454	GFSGLDGAKGDTGPAGPK	7	3	0	0.107003	0.403664	0.0558	0.7913	34	0.010083	0.009135	0.515332
329	P02454	GSP(15.9949)GPAGP(15.9949)KGSP(15.9949)GEAGR	15	2	0	0.055337	0.416601	0.0558	0.7913	44	8.9e-05	0.001392	-0.195044
330	P02454	GSPGADGP(15.9949)AGSP(15.9949)GTPGPQGIAGQR	21	3	0	0.012868	0.306823	0.0558	0.7913	61	6.6e-05	0.000344	-0.56829
331	P02454	DGEAGAQGAPGPAGPAGER	21	3	0	0.039823	0.410757	0.0558	0.7913	57	0.000119	0.000892	-0.349334
332	P02454	GSPGADGPAGSP(15.9949)GTPGPQGIAGQR	23	2	0	0.01601	0.314222	0.0558	0.7913	61	0.00063	0.000578	0.1819
333	P02454	GDTGAKGEP(15.9949)GP(15.9949)AGVQGPP(15.9949)GPAGEEGKR	22	3	0	0.02601	0.241156	0.0558	0.7913	66	0.000623	0.00097	-0.186108
334	P02454	GPSGPQGPSGAPGP(15.9949)K	13	2	0	0.165108	0.477215	0.0558	0.7913	37	0.008984	0.009465	-0.401268
335	P02454	GLTGPIGPP(15.9949)GPAGAP(15.9949)GDKGETGP(15.9949)SGPAGPTGAR	19	3	0	0.020142	0.190774	0.0558	0.7913	74	0.000302	0.000779	-0.727681
336	P02454	GSPGADGPAGSP(15.9949)GTP(15.9949)GPQGIAGQR	23	3	0	0.02176	0.306823	0.0558	0.7913	61	0.000668	0.000654	0.034811
337	P02454	GEPGP(15.9949)AGVQGP(15.9949)P(15.9949)GPAGEEGKR	23	3	0	0.026743	0.318887	0.0558	0.7913	56	0.004056	0.001016	0.744957
338	P02454	GQAGVMGFP(15.9949)GPK	23	2	0	0.016106	0.484948	0.0558	0.7913	24	0.000302	0.000309	-0.328072
339	P02454	NGDRGETGPAGP(15.9949)AGPIGPAGAR	23	2	0	0.023472	0.334472	0.0558	0.7913	57	0.000188	0.000724	-0.068696
340	P02454	GDAGP(15.9949)KGADGSP(15.9949)GKDGVR	12	3	0	0.032288	0.396941	0.0558	0.7913	39	0.000592	0.000789	-0.260916
341	P02454	SAGVSVPGP(15.9949)MGPSGPR	20	2	0	0.012316	0.42023	0.0558	0.7913	36	0.000836	0.000366	0.49197
342	P02454	DGLNGLP(15.9949)GPIGPP(15.9949)GPR	23	2	0	0.024315	0.402632	0.0558	0.7913	33	0.002065	0.000704	0.58208
343	P02454	GEP(15.9949)GPAGVQGPP(15.9949)GPAGEEGKR	20	2	0	0.017142	0.326576	0.0558	0.7913	56	0.000569	0.000465	0.116242
344	P02454	GPSGPQGPSGAP(15.9949)GP(15.9949)K	14	2	0	0.017674	0.465978	0.0558	0.7913	37	0.000783	0.000344	0.387919
345	P02454	GEPGPP(15.9949)GPAGFAGP(15.9949)PGADGQP(15.9949)GAK	22	2	0	0.017683	0.284816	0.0558	0.7913	61	0.000233	0.000491	-0.470838
346	P02454	GVQGP(15.9949)P(15.9949)GPAGPR	23	2	0	0.079331	0.517085	0.0558	0.7913	31	0.004025	0.002788	0.365498
347	P02454	GFSGLQGPP(15.9949)GSPGSP(15.9949)GEQGPSGASGPAGPR	23	3	0	0.011137	0.220881	0.0558	0.7913	76	0.000516	0.000391	-0.002956
348	P02454	GADGSPGKDGVR	6	3	0	0.020919	0.555304	0.0558	0.7913	26	0.00192	0.000579	0.759981
349	P02454	EDLDCPNPQK	13	2	0	0.024826	0.514845	0.0558	0.7913	22	0.005734	0.001256	0.850282
350	P02454	GETGPSGPAGPTGAR	22	2	0	0.00458	0.495459	0.0558	0.7913	36	0.000871	0.000114	0.901152
351	P02454	GDAGPP(15.9949)GPAGPAGPP(15.9949)GPIGNVGAP(15.9949)GPK	18	3	0	0.015692	0.257231	0.0558	0.7913	64	5e-05	0.000445	-1.03231
352	P02454	NGDRGETGPAGPAGPIGPAGAR	23	4	0	0.029681	0.342538	0.0558	0.7913	57	0.000226	0.000888	-0.087069
353	P02454	DGLNGLP(15.9949)GPIGPPGPR	5	2	0	0.147174	0.412342	0.0558	0.7913	33	1.08125	2.09397	-4.41365
354	P02454	DGLNGLP(15.9949)GPIGPPGP(15.9949)R	20	2	0	0.031776	0.402632	0.0558	0.7913	33	0.002744	0.001183	0.567283
355	P02454	GLTGPIGP(15.9949)P(15.9949)GPAGAP(15.9949)GDKGETGPSGPAGPTGAR	23	3	0	0.018755	0.190774	0.0558	0.7913	74	0.000279	0.000717	-0.735977
356	P02454	GDPGPQGPR	13	2	0	0.023633	0.620743	0.0558	0.7913	23	0.005933	0.001426	0.660975
357	P02454	GEPGPPGP(15.9949)AGFAGPP(15.9949)GADGQPGAK	7	3	0	0.01282	0.291684	0.0558	0.7913	61	0.000806	0.000479	0.417663
358	P02454	GLTGPIGP(15.9949)P(15.9949)GPAGAP(15.9949)GDK	23	2	0	0.028742	0.384128	0.0558	0.7913	38	0.00195	0.000781	0.471169
359	P02454	QGPSGASGERGPP(15.9949)GP(15.9949)MGPP(15.9949)GLAGPPGESGR	5	3	0	0.044141	0.201684	0.0558	0.7913	78	0.00015	0.001477	-1.91697
360	P02454	GPP(15.9949)GPM(15.9949)GPPGLAGPPGESGR	23	2	0	0.021928	0.33556	0.0558	0.7913	48	0.000737	0.00078	0.107157
361	P02454	GEPGPAGVQGP(15.9949)P(15.9949)GPAGEEGKR	23	3	0	0.012209	0.326576	0.0558	0.7913	56	0.000905	0.000301	0.494074
362	P02454	GAAGPP(15.9949)GATGFP(15.9949)GAAGR	20	2	0	0.019278	0.431286	0.0558	0.7913	44	0.000195	0.000285	-1.13894
363	P02454	EGECCPFCPEEYVSPDAEVIGVEGPK	14	3	0	0.014631	0.185997	0.0558	0.7913	58	0.02467	0.007216	0.21349
364	P02454	GFSGLQGPPGSP(15.9949)GSPGEQGPSGASGPAGPR	5	3	0	0.013398	0.226207	0.0558	0.7913	76	0.002026	0.000647	0.711618
365	P02454	QGPSGASGERGPP(15.9949)GPMGPP(15.9949)GLAGPPGESGR	7	3	0	0.013835	0.206547	0.0558	0.7913	78	0.001736	0.000628	0.474518
366	P02454	GFSGLQGPP(15.9949)GSP(15.9949)GSP(15.9949)GEQGPSGASGPAGPR	23	2	0	0.00416	0.21568	0.0558	0.7913	76	0.000932	0.000218	0.7498
367	P02454	DGEAGAQGAPGPAGPAGER	23	2	0	0.012122	0.410757	0.0558	0.7913	57	0.00153	0.000369	0.742885
368	P02454	GFSGLQGPP(15.9949)GSPGSPGEQGPSGASGPAGPR	17	3	0	0.016341	0.226207	0.0558	0.7913	76	0.001828	0.00091	0.453964
369	P02454	GDRGETGPAGPP(15.9949)GAP(15.9949)GAPGAP(15.9949)GPVGPAGK	21	3	0	0.01696	0.237572	0.0558	0.7913	72	0.000607	0.000505	-0.339643
370	P02454	GEPGPAGVQGPP(15.9949)GPAGEEGK	23	3	0	0.01112	0.363547	0.0558	0.7913	52	5e-06	0.000272	-0.507818
371	P02454	GSP(15.9949)GADGPAGSP(15.9949)GTPGPQGIAGQR	23	2	0	0.012565	0.306823	0.0558	0.7913	61	0.000172	0.000348	-0.300014
372	P02454	GANGAP(15.9949)GIAGAP(15.9949)GFP(15.9949)GAR	23	3	0	0.156715	0.390279	0.0558	0.7913	47	0.000668	0.004609	-0.099657
373	P02454	GDAGP(15.9949)KGADGSP(15.9949)GKDGVR	23	2	0	0.024546	0.396941	0.0558	0.7913	39	0.000989	0.000603	0.227734
374	P02454	GPPGP(15.9949)MGPP(15.9949)GLAGPPGESGR	23	3	0	0.015212	0.33556	0.0558	0.7913	48	0.000104	0.000339	-0.867884
375	P02454	GEP(15.9949)GSP(15.9949)GENGAP(15.9949)GQMGPR	21	3	0	0.033021	0.360234	0.0558	0.7913	48	0.000485	0.000813	-0.256446
376	P02454	GDAGPP(15.9949)GPAGPAGPP(15.9949)GPIGNVGAPGP(15.9949)K	7	3	0	0.017102	0.257231	0.0558	0.7913	64	0.00034	0.000603	-0.156436
377	P02454	GEPGPAGVQGPP(15.9949)GPAGEEGKR	22	3	0	0.009204	0.334452	0.0558	0.7913	56	8.1e-05	0.000211	-0.621668
378	P02454	GAAGLP(15.9949)GPKGDR	5	3	0	0.003673	0.53417	0.0558	0.7913	28	0.001391	0.000111	0.974786
379	P02454	GDRGDAGP(15.9949)KGADGSP(15.9949)GK	21	2	0	0.026179	0.422058	0.0558	0.7913	38	2e-05	0.000538	-0.813601
380	P02454	GFSGLDGAKGDTGP(15.9949)AGPK	23	2	0	0.017117	0.394159	0.0558	0.7913	34	0.000706	0.000474	0.246914
381	P02454	EDLDCPNPQKR	20	3	0	0.033186	0.473642	0.0558	0.7913	25	0.006665	0.001852	0.793495
382	P02454	GETGPAGPAGPIGPAGAR	23	3	0	0.010728	0.428106	0.0558	0.7913	47	0.001038	0.00031	0.617422
383	P02454	GLTGSP(15.9949)GSP(15.9949)GPDGK	23	2	0	0.020452	0.489475	0.0558	0.7913	27	0.000279	0.000364	-0.513799
384	P02454	GVQGPPGPAGPR	12	2	0	0.089941	0.542324	0.0558	0.7913	31	0.001813	0.003762	0.013553
385	P02454	GSPGEAGRP(15.9949)GEAGLP(15.9949)GAK	22	3	0	0.024646	0.395899	0.0558	0.7913	47	1.2e-05	0.00051	-0.835457
386	P02454	GDRGETGPAGPP(15.9949)GAPGAPGAPGPVGPAGK	20	3	0	0.023153	0.249168	0.0558	0.7913	72	0.00163	0.001143	0.315986
387	P02454	NGDRGETGPAGPAGPIGPAGAR	23	3	0	0.004931	0.342538	0.0558	0.7913	57	0.001065	0.000148	0.87999
388	P02454	GPP(15.9949)GPMGPPGLAGPP(15.9949)GESGR	22	2	0	0.01596	0.33556	0.0558	0.7913	48	0.000142	0.000357	-0.754581
389	P02454	GLTGSP(15.9949)GSPGPDGK	23	2	0	0.012489	0.501278	0.0558	0.7913	27	0.001263	0.000288	0.7268
390	P02454	SAGVSVP(15.9949)GPMGPSGPR	22	2	0	0.012532	0.42023	0.0558	0.7913	36	0.00092	0.000369	0.548415
391	P02454	GEPGP(15.9949)PGPAGFAGPP(15.9949)GADGQPGAK	16	3	0	0.015246	0.291684	0.0558	0.7913	61	0.000844	0.000528	0.299669
392	P02454	GLP(15.9949)GTAGLP(15.9949)GM(15.9949)KGHR	9	4	0	0.023961	0.396192	0.0558	0.7913	29	0.000226	0.000623	-0.413876
393	P02454	GLTGPIGPP(15.9949)GPAGAP(15.9949)GDKGETGPSGPAGPTGAR	23	4	0	0.008499	0.195374	0.0558	0.7913	74	0.000294	0.000403	-0.029824
394	P02454	DGEAGAQGAP(15.9949)GPAGPAGER	22	3	0	0.010871	0.401085	0.0558	0.7913	57	0.000687	0.000231	0.537947
395	P02454	GEPGPP(15.9949)GPAGFAGP(15.9949)PGADGQPGAK	22	2	0	0.023852	0.291684	0.0558	0.7913	61	0.001157	0.000851	-0.711598
396	P02454	GDAGPP(15.9949)GPAGPAGPPGPIGNVGAP(15.9949)GPK	18	3	0	0.018762	0.263434	0.0558	0.7913	64	0.00192	0.000801	0.529869
397	P02454	GQAGVMGFP(15.9949)GP(15.9949)KGTAGEP(15.9949)GK	23	3	0	0.024573	0.31621	0.0558	0.7913	41	0.000165	0.000601	-0.921495
398	P02454	GEPGSP(15.9949)GENGAP(15.9949)GQMGPR	23	3	0	0.079562	0.368921	0.0558	0.7913	48	0.000455	0.002501	0.007265
399	P02454	VGPP(15.9949)GPSGNAGPP(15.9949)GPP(15.9949)GPVGK	23	3	0	0.054907	0.333576	0.0558	0.7913	45	0.000623	0.001955	0.020506
400	P70490	INMFNPTLEAQYIR	18	2	0	0.019699	0.357531	0.0558	0.7913	26	0.04292	0.008562	0.960016
401	P70490	EWLQVDLGTQK	8	2	0	0.024834	0.471013	0.0558	0.7913	18	0.038159	0.008678	0.950967
402	P70490	VSGVMTQGASR	12	2	0	0.054901	0.538036	0.0558	0.7913	23	0.025037	0.008228	0.868158
403	P70490	DFGHIQYVASYK	10	3	0	0.037406	0.429547	0.0558	0.7913	21	0.158398	0.079407	0.918862
404	P70490	INMFNPTLEAQYIR	10	3	0	0.166164	0.357531	0.0558	0.7913	26	0.041211	0.117844	0.182223
405	P15999	VVDALGNAIDGK	12	2	0	0.057293	0.523472	0.0558	0.7913	21	0.04585	0.018728	0.835518
406	P15999	TSIAIDTIINQK	8	2	0	0.047176	0.480402	0.0558	0.7913	19	0.061963	0.024379	0.852901
407	P15999	TGAIVDVPVGDELLGR	15	2	0	0.04583	0.406114	0.0558	0.7913	28	0.043652	0.017631	0.760644
408	P15999	HALIIYDDLSK	6	2	0	0.217044	0.473871	0.0558	0.7913	17	0.028394	0.068587	0.345258
409	P15999	AVDSLVPIGR	10	2	0	0.027399	0.560588	0.0558	0.7913	19	0.044507	0.008904	0.889412
410	P09650	ISPYVPWINK	13	2	0	0.010972	0.474884	0.0558	0.7913	13	0.00578	0.000867	0.9148
411	P09650	ETTVTLGVHDVSK	4	3	0	0.063927	0.465946	0.0558	0.7913	17	0.003583	0.003724	0.065365
412	P85125	IIGAVDQIQLTQAQLEER	9	3	0	0.017333	0.324505	0.0558	0.7913	44	0.061963	0.016147	0.78255
413	P11980	LDIDSAPITAR	10	2	0	0.044029	0.523472	0.0558	0.7913	23	0.037305	0.029003	0.331376
414	P16636	NQGTSDFLPSRPR	9	3	0	0.067794	0.443606	0.0558	0.7913	28	0.001111	0.005639	-0.452272
415	P04937	WSRPQAPITGYR	15	3	0	0.059988	0.434828	0.0558	0.7913	26	0.030347	0.015295	0.787196
416	P04937	WLPSTSPVTGYR	11	2	0	0.037862	0.450049	0.0558	0.7913	18	0.048047	0.018894	0.729516
417	P04937	YSFCTDHAVLVQTR	17	3	0	0.035544	0.377861	0.0558	0.7913	23	0.080518	0.02895	0.850626
418	P04937	STTPDITGYR	16	2	0	0.097242	0.543121	0.0558	0.7913	15	0.012036	0.010833	0.18746
419	P04937	TVLVTWTPPR	10	2	0	0.026594	0.500051	0.0558	0.7913	11	0.018628	0.005356	0.833805
420	P04937	DLQFVEVTDVK	7	2	0	0.093566	0.478615	0.0558	0.7913	15	0.878125	1.11808	-2.21678
421	P04937	LGVRPSQGGEAPR	8	3	0	0.078469	0.484529	0.0558	0.7913	34	0.038281	0.020273	0.630172
422	P04937	ATGVFTTLQPLR	19	2	0	0.038203	0.47153	0.0558	0.7913	19	0.059888	0.020396	0.891666
423	P04937	YIVNVYQISEEGK	10	2	0	0.015122	0.411585	0.0558	0.7913	23	0.345898	0.055745	0.987003
424	P04937	APITGYIIR	19	2	0	0.051715	0.552966	0.0558	0.7913	16	0.028394	0.012505	0.802172
425	P04937	VDVLPVNLPGEHGQR	7	3	0	0.039793	0.39915	0.0558	0.7913	30	0.082715	0.037311	0.601897
426	O70210	NNFPVLAANSFR	17	2	0	0.129005	0.457844	0.0558	0.7913	24	0.074902	0.072961	0.61096
427	O70210	FSDAAFAGVTTLK	9	2	0	0.046534	0.4624	0.0558	0.7913	21	0.003941	0.001932	-1.65264
428	O70210	YLETLWLDNTNLEK	16	2	0	0.011182	0.36319	0.0558	0.7913	17	0.237988	0.033772	0.987757
429	O70210	SIPDNAFQSFGR	18	2	0	0.03471	0.467571	0.0558	0.7913	27	0.376172	0.087391	0.943045
430	O70210	IRDTDALR	7	3	0	0.02674	0.596861	0.0558	0.7913	16	0.012067	0.002718	0.952951
431	O70210	NQLSSYPSAALSK	15	2	0	0.031075	0.467058	0.0558	0.7913	29	0.12959	0.032672	0.959689
432	Q9JI03	GVQGP(15.9949)P(15.9949)GPTGKP(15.9949)GR	23	3	0	0.067868	0.448847	0.0558	0.7913	29	0.000684	0.001461	-0.543803
433	Q9JI03	GVQGP(15.9949)P(15.9949)GPTGKP(15.9949)GR	5	2	0	0.064382	0.448847	0.0558	0.7913	29	5.8e-05	0.001758	-0.393777
434	Q9JI03	RGPP(15.9949)GPAGPEGR	20	3	0	0.049098	0.518665	0.0558	0.7913	33	0.002133	0.001175	0.350924
435	Q9JI03	RGPP(15.9949)GPAGPEGR	23	2	0	0.0562	0.518665	0.0558	0.7913	33	0.000859	0.001144	-0.11558
436	Q9JI03	GPP(15.9949)GPAGPEGR	23	2	0	0.03668	0.563785	0.0558	0.7913	30	0.00208	0.000899	0.525188
437	Q9JI03	TGPIGPQGAP(15.9949)GKP(15.9949)GPDGLR	9	3	0	0.021994	0.351854	0.0558	0.7913	41	0.002103	0.000778	0.67871
438	P47853	IQAIELEDLLR	12	2	0	0.016578	0.476251	0.0558	0.7913	25	0.020795	0.002962	0.936043
439	P47853	LGLGHNQIR	20	3	0	0.036972	0.569565	0.0558	0.7913	18	0.011395	0.003035	0.892936
440	P47853	VGINDFCPMGFGVK	20	2	0	0.019817	0.388754	0.0558	0.7913	19	0.01521	0.003248	0.932834
441	P47853	EISPDTTLLDLQNNDISELRK	11	3	0	0.012324	0.266118	0.0558	0.7913	38	0.016309	0.011344	0.316285
442	P47853	NHLVEIPPNLPSSLVELR	9	3	0	0.014303	0.312688	0.0558	0.7913	36	0.013593	0.001285	0.936683
443	P47853	LAIQFGNYK	13	2	0	0.028939	0.533645	0.0558	0.7913	15	0.073682	0.01873	0.931054
444	P47853	GLQHLYALVLVNNK	8	3	0	0.027231	0.396112	0.0558	0.7913	21	0.013287	0.003488	0.91001
445	P04797	LISWYDNEYGYSNR	18	2	0	0.030578	0.35657	0.0558	0.7913	23	0.040112	0.013	0.810736
446	P04797	QAAEGPLK	4	2	0	0.093005	0.636103	0.0558	0.7913	22	0.010388	0.007575	0.601226
447	P04797	GAAQNIIPASTGAAK	8	2	0	0.025157	0.46992	0.0558	0.7913	38	0.031445	0.006602	0.961402
448	O08590	ALDPALWTIQK	10	2	0	0.023561	0.476134	0.0558	0.7913	19	0.044751	0.0169	0.651239
449	P05539	GIVGLP(15.9949)GQR	8	2	0	0.083722	0.589144	0.0558	0.7913	18	65535.3	3.03459e+09	-1.5134
450	P05539	GSP(15.9949)GAQGLQGPR	21	2	0	0.03279	0.530948	0.0558	0.7913	32	0.001202	0.000767	0.344066
451	P05539	GAQGPP(15.9949)GATGFP(15.9949)GAAGR	19	2	0	0.09107	0.419306	0.0558	0.7913	44	0.002103	0.00267	-0.024474
452	P15429	FM(15.9949)IELDGTENK	22	2	0	0.046977	0.454004	0.0558	0.7913	18	0.000409	0.001565	-0.3288
453	P15429	VVIGM(15.9949)DVAASEFYR	8	2	0	0.062843	0.382299	0.0558	0.7913	26	0.004498	0.002285	-15.0629
454	P04692	KLVIIESDLER	14	3	0	0.058701	0.476251	0.0558	0.7913	20	0.007825	0.003869	0.287769
455	P04692	LVIIESDLER	11	2	0	0.045245	0.513899	0.0558	0.7913	20	0.008359	0.002958	0.507001
456	P04692	SIDDLEDELYAQK	8	2	0	0.024666	0.427689	0.0558	0.7913	27	0.018292	0.003956	0.917733
457	P04692	QLEDELVSLQK	6	2	0	0.028144	0.48637	0.0558	0.7913	23	0.016675	0.017	0.321751
458	P31000	KVESLQEEIAFLKK	8	3	0	0.039642	0.382343	0.0558	0.7913	27	0.062207	0.068618	0.902691
459	P31000	EMEENFALEAANYQDTIGR	10	2	0	0.015462	0.285128	0.0558	0.7913	47	0.041211	0.011743	0.742784
460	P31000	LQDEIQNMKEEMAR	9	3	0	0.023504	0.362262	0.0558	0.7913	35	0.090039	0.024704	0.746017
461	P31000	ETNLESLPLVDTHSK	15	3	0	0.017995	0.394399	0.0558	0.7913	26	0.05354	0.01002	0.981567
462	P31000	QVDQLTNDK	9	2	0	0.037927	0.56769	0.0558	0.7913	15	0.062451	0.019193	0.943975
463	P31000	QQYESVAAK	12	2	0	0.121201	0.5662	0.0558	0.7913	24	0.063672	0.045291	0.127931
464	P31000	KVESLQEEIAFLK	14	3	0	0.011522	0.412567	0.0558	0.7913	27	0.061108	0.006205	0.990349
465	P31000	EEAESTLQSFR	20	2	0	0.209622	0.49425	0.0558	0.7913	30	0.059766	0.085294	0.075709
466	P31000	QVQSLTCEVDALK	13	2	0	0.063359	0.437872	0.0558	0.7913	25	0.0771	0.040662	0.665294
467	P31000	ILLAELEQLK	9	2	0	0.009795	0.506912	0.0558	0.7913	20	0.067578	0.007357	0.994518
468	P31000	EMEENFALEAANYQDTIGR	10	3	0	0.021455	0.285128	0.0558	0.7913	47	0.052686	0.019885	0.672348
469	P31000	QDVDNASLAR	18	2	0	0.031199	0.563543	0.0558	0.7913	25	0.055859	0.010142	0.966816
470	P31000	ILLAELEQLKGQGK	13	3	0	0.017696	0.415096	0.0558	0.7913	28	0.066113	0.009967	0.968646
471	P51886	FTGLQYLR	12	2	0	0.021294	0.552966	0.0558	0.7913	12	0.011334	0.003293	0.718233
472	P51886	LDGNPLTQSSLPPDMYECLR	11	3	0	0.017508	0.263338	0.0558	0.7913	38	0.009106	0.014588	0.075485
473	P51886	SLQDLQLANNK	16	2	0	0.025136	0.507068	0.0558	0.7913	23	0.009625	0.001925	0.81365
474	P51886	SIPTVNENLENYYLEVNK	15	2	0	0.014197	0.297079	0.0558	0.7913	30	0.009259	0.00152	0.850523
475	P51886	ITNIPDEYFNR	17	2	0	0.015637	0.452891	0.0558	0.7913	19	0.009625	0.001534	0.922406
476	P51886	NNQIDHIDEK	17	3	0	0.232277	0.517176	0.0558	0.7913	21	0.000958	0.007276	-0.022899
477	P51886	SLEYLDLSFNQMSK	15	2	0	0.037874	0.371021	0.0558	0.7913	24	0.015637	0.004861	0.507169
478	contaminant_IGA3_HAEIN	KDASIRSEFPQNR	10	2	0	0.014512	0.426539	0.0558	0.7913	32	0.008099	0.001782	0.838238
479	P68136	DLYANNVMSGGTTMYPGIADR	10	3	0	0.020568	0.265292	0.0558	0.7913	36	0.008252	0.006292	0.155667
480	Q07936	SLYYFIQQDTK	16	2	0	0.013753	0.43648	0.0558	0.7913	16	0.049939	0.007306	0.983422
481	Q07936	TNQELQEINR	7	2	0	0.087987	0.515283	0.0558	0.7913	25	0.091748	0.062046	0.786441
482	Q07936	SYSPYDMLESIR	14	2	0	0.027199	0.42046	0.0558	0.7913	23	0.024548	0.006278	0.948553
483	Q07936	AEDGSVIDYELIDQDAR	9	2	0	0.017972	0.353274	0.0558	0.7913	39	0.028271	0.011957	0.615993
484	Q07936	TPAQYDASELK	9	2	0	0.040141	0.50583	0.0558	0.7913	25	0.047314	0.015372	0.708842
485	Q07936	GVDEVTIVNILTNR	11	2	0	0.01513	0.425498	0.0558	0.7913	20	0.025891	0.003956	0.978536
486	Q07936	QDIAFAYQR	16	2	0	0.095781	0.527227	0.0558	0.7913	23	0.014844	0.010371	0.454331
487	P70560	GDIASQNMMR	9	2	0	0.083092	0.511242	0.0558	0.7913	23	0.003323	0.004441	0.21499
488	P02091	VNPDDVGGEALGR	6	2	0	0.131347	0.497279	0.0558	0.7913	28	0.121289	0.109269	-5.15227
489	P49744	CDSSPCFR	16	2	0	0.148543	0.564582	0.0558	0.7913	17	0.012585	0.015087	0.256264
490	P49744	QVCTDVDECR	10	2	0	0.249786	0.503861	0.0558	0.7913	20	0.241406	0.620897	-0.968975
491	P49744	CGPCKPGYTGDQTR	11	3	0	0.029056	0.412496	0.0558	0.7913	25	0.082959	0.028493	0.900185
492	P49744	QTEQTYWQATPFR	13	2	0	0.17457	0.38377	0.0558	0.7913	27	0.012585	0.021091	0.176313
493	P49744	NILDNCPR	9	2	0	0.066772	0.576925	0.0558	0.7913	15	0.022107	0.011324	0.625189
494	P49744	CTNLAPGFR	12	2	0	0.037903	0.553273	0.0558	0.7913	17	0.048779	0.013689	0.872744
495	P49744	IDVCPENAEITLTDFR	15	2	0	0.108358	0.344745	0.0558	0.7913	29	0.034741	0.03757	0.082412
496	P49744	AFSGLTQNPQAIELR	12	2	0	0.020943	0.395267	0.0558	0.7913	35	0.522656	0.098304	0.975024
497	Q29RW1	AAYLTSLNSADLLK	11	2	0	0.068049	0.431231	0.0558	0.7913	25	0.0323	0.023106	0.59776
498	Q29RW1	VQLLHTQNTSLINTK	11	3	0	0.050791	0.384287	0.0558	0.7913	22	0.017468	0.00814	0.824196
499	Q29RW1	ANLM(15.9949)QAEIEELR	20	2	0	0.062268	0.431762	0.0558	0.7913	32	0.009045	0.003281	-1.24951
500	Q29RW1	VAEQELLDASER	7	2	0	0.254023	0.48052	0.0558	0.7913	33	0.003735	0.048492	-0.060134
501	Q29RW1	LLGSIDIDHTQYK	11	3	0	0.053644	0.424926	0.0558	0.7913	20	0.001584	0.001651	-2.15304
502	Q29RW1	MEIDDLASNMETVSK	5	2	0	0.034317	0.374051	0.0558	0.7913	28	0.023511	0.011677	0.932122
503	P62804	TVTAMDVVYALKR	10	2	0	0.030889	0.415758	0.0558	0.7913	18	0.004941	0.001938	0.483223
504	P62804	DNIQGITKPAIR	20	3	0	0.017666	0.477417	0.0558	0.7913	24	0.003979	0.000657	0.89258
505	P62804	DAVTYTEHAK	17	3	0	0.034341	0.531238	0.0558	0.7913	19	0.004529	0.001343	0.738153
506	P62804	TVTAM(15.9949)DVVYALK	8	2	0	0.097897	0.441285	0.0558	0.7913	15	32767.3	1.30193e+09	-3.36687
507	P62804	ISGLIYEETR	21	2	0	0.020452	0.513899	0.0558	0.7913	19	0.004781	0.000941	0.79977
508	P62804	VFLENVIR	6	2	0	0.010115	0.559116	0.0558	0.7913	12	0.004285	0.000837	0.694999
509	P62804	DNIQGITKPAIR	20	2	0	0.025083	0.477417	0.0558	0.7913	24	0.004041	0.000891	0.738825
510	P62804	TVTAMDVVYALK	10	3	0	0.030408	0.451926	0.0558	0.7913	15	0.003995	0.001733	0.701415
511	P62804	DAVTYTEHAK	18	2	0	0.016933	0.531238	0.0558	0.7913	19	0.003697	0.000707	0.870679
512	P62804	TVTAMDVVYALK	20	2	0	0.008803	0.451926	0.0558	0.7913	15	0.004414	0.000439	0.95073
513	P62804	TVTAMDVVYALKR	11	3	0	0.007558	0.415758	0.0558	0.7913	18	0.005681	0.000467	0.971459
514	P15865	ASGPPVSELITK	15	2	0	0.018218	0.508247	0.0558	0.7913	23	0.020642	0.002943	0.969952
515	P02770	FPNAEFAEITK	16	2	0	0.025325	0.475611	0.0558	0.7913	23	0.122266	0.025116	0.967624
516	P02770	SIHTLFGDK	8	2	0	0.088134	0.556458	0.0558	0.7913	12	0.053418	0.043691	0.667275
517	P02770	TNCELYEK	9	2	0	0.086956	0.554086	0.0558	0.7913	13	0.023877	0.020552	0.512626
518	P02770	TCVADENAENCDK	6	2	0	0.030831	0.446358	0.0558	0.7913	28	0.193555	0.066261	0.951458
519	P02770	CCTLPEAQR	9	2	0	0.331013	0.534924	0.0558	0.7913	22	3.175	17.4753	-1.46859
520	P02770	APQVSTPTLVEAAR	16	2	0	0.018046	0.448512	0.0558	0.7913	33	0.148389	0.026459	0.987693
521	P02770	CCSGSLVER	6	2	0	0.032597	0.561176	0.0558	0.7913	19	0.100293	0.028113	0.961516
522	P02770	TVMGDFAQFVDK	6	2	0	0.022679	0.439372	0.0558	0.7913	17	0.776563	0.318302	0.963847
523	P02770	LGEYGFQNAVLVR	10	2	0	0.022483	0.426408	0.0558	0.7913	24	0.228711	0.048358	0.963182
524	Q00715	AMGIMNSFVNDIFER	13	2	0	0.015687	0.342687	0.0558	0.7913	27	0.00639	0.000767	0.89575
525	Q00715	KESYSVYVYK	14	3	0	0.156121	0.472108	0.0558	0.7913	13	0.006055	0.010774	-0.044405
526	Q00715	ESYSVYVYK	15	2	0	0.017459	0.509428	0.0558	0.7913	12	0.005627	0.001274	0.768757
527	Q00715	KESYSVYVYK	21	2	0	0.028244	0.472108	0.0558	0.7913	13	0.004453	0.001831	0.481067
528	Q00715	AM(15.9949)GIMNSFVNDIFER	8	2	0	0.036211	0.334618	0.0558	0.7913	27	0.006024	0.001791	0.699497
529	Q00715	AM(15.9949)GIM(15.9949)NSFVNDIFER	14	2	0	0.034229	0.326739	0.0558	0.7913	27	0.007977	0.002577	0.30436
530	Q00715	AMGIM(15.9949)NSFVNDIFER	6	2	0	0.040378	0.334618	0.0558	0.7913	27	0.007581	0.003063	0.702382
531	Q9EQP5	ECYCPPDFPSALYCDSR	13	3	0	0.014218	0.291276	0.0558	0.7913	35	0.021191	0.00476	0.47209
532	Q9EQP5	ISNVPAISNK	15	2	0	0.032478	0.559253	0.0558	0.7913	19	0.007458	0.001768	0.769315
533	Q9EQP5	NQLEEVPSALPR	17	2	0	0.008214	0.471646	0.0558	0.7913	31	0.012967	0.000756	0.990725
534	Q9EQP5	WINLDNNR	10	2	0	0.013237	0.556492	0.0558	0.7913	13	0.009015	0.00103	0.932512
535	Q9EQP5	DFPNLAFIR	11	2	0	0.008585	0.520059	0.0558	0.7913	16	0.012143	0.000883	0.985529
536	Q9EQP5	ECYCPPDFPSALYCDSR	14	2	0	0.014655	0.291276	0.0558	0.7913	35	0.024548	0.005	0.505001
537	Q9EQP5	ADTFQGLK	11	2	0	0.015758	0.607125	0.0558	0.7913	14	0.011975	0.001317	0.94724
538	Q9EQP5	LENLLLLDLQHNR	21	3	0	0.010183	0.406039	0.0558	0.7913	23	0.016599	0.001585	0.986089
539	Q9EQP5	IETIPSGYFK	18	2	0	0.010245	0.503178	0.0558	0.7913	15	0.012814	0.001153	0.954359
540	Q9EQP5	IPPGVFSK	10	2	0	0.028864	0.600299	0.0558	0.7913	12	0.004987	0.002467	0.26587
541	Q9EQP5	LENLLLLDLQHNR	11	2	0	0.064312	0.406039	0.0558	0.7913	23	0.023267	0.011061	0.193101
542	Q9EQP5	KVPIIPPR	17	2	0	0.065456	0.575723	0.0558	0.7913	14	0.002301	0.002805	-0.417279
543	Q9EQP5	NLMQLNLAHNILR	13	3	0	0.011737	0.400226	0.0558	0.7913	24	0.01312	0.001403	0.985235
544	Q9EQP5	LPGLAFLYM(15.9949)DK	12	2	0	0.024216	0.436323	0.0558	0.7913	15	0.014691	0.003072	0.94422
545	Q9EQP5	LPGLAFLYMDK	16	2	0	0.009625	0.446845	0.0558	0.7913	15	0.013928	0.001188	0.986424
546	Q9EQP5	NLMQLNLAHNILR	12	2	0	0.025179	0.400226	0.0558	0.7913	24	0.012738	0.002235	0.936668
547	Q9EQP5	NLM(15.9949)QLNLAHNILR	12	3	0	0.021249	0.390802	0.0558	0.7913	24	0.01283	0.002451	0.949115
548	P35444	NSDKDKWGDACDNCR	5	3	0	0.136138	0.370864	0.0558	0.7913	28	0.019238	0.026368	0.549472
549	P35444	NVADNCPR	12	2	0	0.034369	0.603023	0.0558	0.7913	18	0.029431	0.007364	0.841148
550	P35444	QM(15.9949)EQTYWQANPFR	15	2	0	0.036219	0.351704	0.0558	0.7913	30	0.018384	0.006561	0.850928
551	P35444	GSFQCGPCQPGFVGDQR	15	3	0	0.01889	0.341892	0.0558	0.7913	38	0.058301	0.010298	0.931186
552	P35444	SCVCAVGWAGNGLLCGR	8	3	0	0.016558	0.35177	0.0558	0.7913	31	0.051221	0.015426	0.969856
553	P35444	GSFQCGPCQPGFVGDQR	15	2	0	0.016154	0.341892	0.0558	0.7913	38	0.053662	0.008127	0.962328
554	P35444	QMEQTYWQANPFR	11	3	0	0.016209	0.360185	0.0558	0.7913	30	0.028882	0.005206	0.974167
555	P35444	SCVCAVGWAGNGLLCGR	13	2	0	0.016482	0.35177	0.0558	0.7913	31	0.054883	0.008842	0.953438
556	P35444	NALWHTGDTASQVR	17	3	0	0.024043	0.421847	0.0558	0.7913	28	0.035474	0.007096	0.953473
557	P35444	QMEQTYWQANPFR	16	2	0	0.013859	0.360185	0.0558	0.7913	30	0.048779	0.006683	0.984817
558	P35444	WGDACDNCR	11	2	0	0.016649	0.531698	0.0558	0.7913	18	0.028027	0.003947	0.922428
559	P35444	IDVCPENAEVTLTDFR	8	3	0	0.012884	0.348579	0.0558	0.7913	29	0.04707	0.006757	0.969038
560	P35444	ELQETNAALQDVR	17	3	0	0.243693	0.448623	0.0558	0.7913	33	0.010144	0.01809	0.210584
561	P35444	NTVMECDACGMQPAR	16	2	0	0.020559	0.361227	0.0558	0.7913	34	0.05061	0.009816	0.949209
562	P35444	DTDLDGFPDEK	21	2	0	0.08651	0.504072	0.0558	0.7913	18	0.091016	0.061496	-0.113928
563	P35444	IDVCPENAEVTLTDFR	16	2	0	0.05354	0.348579	0.0558	0.7913	29	0.091504	0.045219	0.460524
564	P35444	ELQETNAALQDVR	13	2	0	0.034202	0.448623	0.0558	0.7913	33	0.091504	0.020451	0.705843
565	P0C0S7	GDEELDSLIK	8	2	0	0.03574	0.544518	0.0558	0.7913	19	0.034497	0.010783	0.797016
566	Q01129	TSYTAVSLYSNPVR	9	3	0	0.09863	0.413122	0.0558	0.7913	23	2.81562	4.94414	0.352576
567	Q01129	VPAGLAQHK	19	3	0	0.028774	0.590151	0.0558	0.7913	21	0.026379	0.005181	0.965928
568	Q01129	LHDNEITK	12	2	0	0.011573	0.5867	0.0558	0.7913	13	0.035291	0.003056	0.982111
569	Q01129	KTSYTAVSLYSNPVR	19	2	0	0.057338	0.382857	0.0558	0.7913	23	0.013379	0.007754	0.684097
570	Q01129	DLHTLILVNNK	23	2	0	0.020127	0.482078	0.0558	0.7913	13	0.031628	0.00687	0.95491
571	Q01129	M(15.9949)IVIELGGNPLK	14	2	0	0.015138	0.446683	0.0558	0.7913	18	0.028271	0.003448	0.967155
572	Q01129	TSYTAVSLYSNPVR	13	2	0	0.1532	0.413122	0.0558	0.7913	23	65535.3	3.32992e+09	-5.48384
573	Q01129	VPAGLAQHK	19	2	0	0.02356	0.590151	0.0558	0.7913	21	0.030469	0.004748	0.975573
574	Q01129	ISPEAFKPLVK	21	3	0	0.015817	0.479023	0.0558	0.7913	19	0.035657	0.004872	0.982188
575	Q01129	KSVFNGLNR	7	3	0	0.104332	0.557819	0.0558	0.7913	14	0.013013	0.01246	0.475338
576	Q01129	NSGIENGALQGM(15.9949)K	18	2	0	0.080298	0.462489	0.0558	0.7913	28	0.044995	0.026262	0.307384
577	Q01129	NSGIENGALQGMK	18	2	0	0.067183	0.473642	0.0558	0.7913	28	0.052686	0.027205	0.673829
578	Q01129	ISPEAFKPLVK	14	2	0	0.018107	0.479023	0.0558	0.7913	19	0.036572	0.005877	0.974387
579	Q01129	YWQIHPHTFR	11	3	0	0.026849	0.42994	0.0558	0.7913	18	0.05647	0.017815	0.966077
580	Q01129	MIVIELGGNPLK	18	2	0	0.014741	0.457455	0.0558	0.7913	18	0.034497	0.004555	0.981744
581	Q01129	KTSYTAVSLYSNPVR	18	3	0	0.016978	0.382857	0.0558	0.7913	23	0.02699	0.004671	0.966823
582	Q01129	NLKDLHTLILVNNK	8	3	0	0.022862	0.392786	0.0558	0.7913	16	0.027783	0.008919	0.958436
583	Q01129	DLHTLILVNNK	17	3	0	0.012708	0.482078	0.0558	0.7913	13	0.030347	0.004022	0.98617
584	Q9ESC2	VCEPLLGYYPYPYCYQGGR	10	3	0	0.019407	0.243018	0.0558	0.7913	32	0.001263	0.001745	0.116446
585	P50609	ELHLDHNQISR	18	2	0	0.317663	0.4728	0.0558	0.7913	26	0.014722	0.030015	0.079973
586	P50609	SAMPVDAPLCLR	9	2	0	0.007294	0.452674	0.0558	0.7913	26	0.015576	0.000935	0.993593
587	P50609	IPPVNTNLENLYLQGNR	19	3	0	0.006265	0.330468	0.0558	0.7913	30	0.017377	0.001112	0.991487
588	P50609	DCPQECDCPPNFPTAMYCDNR	13	3	0	0.026099	0.218321	0.0558	0.7913	44	0.003522	0.001543	-0.664632
589	P50609	IPPVNTNLENLYLQGNR	17	2	0	0.00882	0.330468	0.0558	0.7913	30	0.01698	0.001547	0.984932
590	P50609	SLILLDLSYNHLR	12	3	0	0.011975	0.405493	0.0558	0.7913	20	0.014264	0.001739	0.97877
591	P50609	SLILLDLSYNHLR	12	2	0	0.047199	0.405493	0.0558	0.7913	20	0.01344	0.005957	0.663943
592	P50609	ELHLDHNQISR	19	3	0	0.020758	0.4728	0.0558	0.7913	26	0.019421	0.003087	0.96454
593	P00564	GGDDLDPNYVLSSR	14	2	0	0.105303	0.439371	0.0558	0.7913	25	0.005444	0.007315	0.008827
594	P00564	VLTPDLYNK	7	2	0	0.040047	0.538988	0.0558	0.7913	9	0.003705	0.0041	0.170061
595	P00564	LSVEALNSLTGEFK	12	2	0	0.04041	0.425472	0.0558	0.7913	24	0.006329	0.002795	0.282091
596	P00564	DLFDPIIQDR	10	2	0	0.171099	0.495307	0.0558	0.7913	19	0.628125	1.82513	-144.136
597	P02600	DQGGYEDFVEGLR	22	2	0	0.058539	0.437174	0.0558	0.7913	27	0.007993	0.002862	-0.814946
598	P02600	EAFLLFDR	13	2	0	0.0342	0.547586	0.0558	0.7913	15	0.006146	0.00182	-2.69028
599	P02600	ITLSQVGDVLR	14	2	0	0.049884	0.511362	0.0558	0.7913	17	0.010083	0.004928	-8.80604
600	contaminant_INT-STD1	LGEYGFQNALIVR	6	2	0	0.224182	0.421718	0.0558	0.7913	25	0.3	150.263	-0.966902
601	P29457	LYGPSSVSFADDFVR	10	2	0	0.158852	0.381433	0.0558	0.7913	26	0.013013	0.027979	0.039652
602	P29457	DNQSGSLLFIGR	13	2	0	0.118636	0.483347	0.0558	0.7913	23	0.33125	0.337167	0.605194

## Sheet: hl-data
ID	t	A0	m0	m1	m2	m3	m4	m5	notFoundBySE
0	0	0.485462	0.485462	0.348574	0.126852	0.033921	0.005191	0
0	0	0.489575	0.489575	0.331849	0.14096	0.028964	0.008651	0
0	0	0.495888	0.495888	0.334329	0.13098	0.029169	0.009635	0
0	1	0.411471	0.411471	0.348889	0.169919	0.062463	0.007256	0
0	1	0.38785	0.38785	0.356158	0.173706	0.069405	0.012882	0
0	1	0.43294	0.43294	0.325741	0.160672	0.055738	0.024909	0
0	63	0.149964	0.149964	0.279758	0.294185	0.156238	0.091631	0.025806
0	63	0.155936	0.155936	0.298666	0.250518	0.18236	0.088614	0.020851
0	99	0.16872	0.16872	0.295596	0.254352	0.17412	0.070198	0.020991
0	99	0.124166	0.124166	0.244934	0.27586	0.185818	0.111947	0.045137
1	0	0.340952	0.340952	0.38782	0.197433	0.051183	0.022612	0
1	0	0.385258	0.385258	0.411232	0.180384	0.022116	0.001009	0
1	1	0.380372	0.380372	0.379005	0.166672	0.072067	0.001884	0
1	1	0.371803	0.371803	0.335381	0.227209	0.047041	0.018801	-0.000235
1	1	0.37579	0.37579	0.37138	0.167147	0.072517	0.013166	0
1	3	0.379278	0.379278	0.336499	0.1882	0.091816	0.004207	0
1	15	0.276011	0.276011	0.281525	0.223223	0.119203	0.064408	0.027806
2	0	0.427631	0.427631	0.348299	0.156487	0.054459	0.013124	0
2	0	0.430362	0.430362	0.349191	0.155398	0.051222	0.013828	0
2	0	0.426639	0.426639	0.349088	0.157236	0.051221	0.015816	0
2	1	0.421026	0.421026	0.355498	0.153509	0.054146	0.01582	0
2	1	0.426058	0.426058	0.344911	0.164238	0.049337	0.015457	0
2	1	0.427208	0.427208	0.34759	0.160182	0.05145	0.01357	0
2	3	0.420383	0.420383	0.341263	0.166463	0.055132	0.016759	0
2	3	0.430083	0.430083	0.344578	0.159529	0.051887	0.013923	0
2	3	0.417836	0.417836	0.347671	0.163023	0.057372	0.014097	0
2	6	0.416553	0.416553	0.352357	0.162263	0.054045	0.014781	0
2	6	0.419772	0.419772	0.342646	0.168635	0.055732	0.013215	0
2	6	0.433355	0.433355	0.341887	0.155603	0.055917	0.013237	0
2	15	0.426183	0.426183	0.338927	0.157529	0.060396	0.016966	0
2	15	0.415838	0.415838	0.338931	0.165761	0.061828	0.017641	0
2	15	0.422896	0.422896	0.334742	0.171301	0.054535	0.016526	0
2	31	0.421647	0.421647	0.343734	0.157614	0.059982	0.017024	0
2	31	0.407307	0.407307	0.339027	0.16751	0.058019	0.021563	0.006573
2	63	0.403718	0.403718	0.32821	0.170463	0.063113	0.024997	0.009497
2	63	0.401719	0.401719	0.33732	0.166261	0.063917	0.022578	0.008204
2	63	0.412703	0.412703	0.339967	0.161844	0.058441	0.022261	0.004785
2	99	0.411209	0.411209	0.346971	0.16	0.061306	0.020514	0
2	99	0.404693	0.404693	0.333393	0.164865	0.065588	0.022426	0.009036
2	99	0.398206	0.398206	0.337249	0.165949	0.06499	0.022664	0.010942
3	0	0.000668995	0.000669	0.307284	0.347046	0.207858	0.094753	0.033155
3	0	0.73638	0.73638	0.26362	0	0	0	0
3	0	0.000898346	0.000898	0.302762	0.348256	0.214551	0.091524	0.033037
3	1	0.723185	0.723185	0.250451	0.026364	0	0	0
3	3	0.00137498	0.001375	0.295474	0.341472	0.21604	0.097468	0.036981
3	3	0.000610712	0.000611	0.303314	0.341137	0.213933	0.097194	0.034085
3	6	0.663527	0.663527	0.336473	0	0	0	0
3	6	0.000927204	0.000927	0.305222	0.346667	0.21191	0.094721	0.032169
3	6	0.00114446	0.001144	0.300649	0.344951	0.214855	0.096935	0.031947
3	15	0.00137646	0.001376	0.292361	0.335643	0.213055	0.102565	0.041989
3	15	0.00106709	0.001067	0.289554	0.333417	0.21651	0.101963	0.042883
3	15	0.00107944	0.001079	0.290314	0.330896	0.212128	0.100055	0.042091
3	31	0.0155694	0.015569	0.293214	0.312822	0.19812	0.106472	0.04894
3	31	0.0016451	0.001645	0.286024	0.331193	0.208904	0.102545	0.044173
3	63	0.00145912	0.001459	0.266017	0.312896	0.207897	0.112542	0.058413
3	63	0.0016423	0.001642	0.263999	0.311429	0.209972	0.11245	0.057661
3	63	0.00128248	0.001282	0.259163	0.311973	0.210313	0.115847	0.059164
3	99	0.00135439	0.001354	0.265425	0.312539	0.205818	0.112455	0.059126
3	99	0.00152341	0.001523	0.258504	0.301589	0.207698	0.121638	0.067109
3	99	0.00138995	0.00139	0.257954	0.302573	0.208285	0.114177	0.058244
4	0	0.244985	0.244985	0.33168	0.228839	0.121456	0.051647	0.018867
4	0	0.238871	0.238871	0.322042	0.247	0.119291	0.051389	0.017779
4	0	0.243698	0.243698	0.325158	0.231347	0.124728	0.051739	0.018427
4	1	0.248596	0.248596	0.329148	0.239216	0.123122	0.045244	0.014674
4	1	0.237134	0.237134	0.32911	0.243448	0.120985	0.047186	0.017902
4	1	0.251532	0.251532	0.333477	0.229718	0.117915	0.052948	0.01441
4	3	0.240117	0.240117	0.32996	0.243594	0.119082	0.053473	0.013773
4	3	0.234585	0.234585	0.328633	0.240963	0.125475	0.047746	0.018043
4	3	0.237057	0.237057	0.342529	0.268384	0.090627	0.052206	0.009197
4	6	0.244686	0.244686	0.322462	0.238597	0.120403	0.050613	0.017883
4	6	0.240572	0.240572	0.325646	0.239073	0.123206	0.050896	0.016872
4	6	0.23173	0.23173	0.33134	0.23194	0.132046	0.051256	0.017938
4	15	0.237131	0.237131	0.317409	0.241128	0.125219	0.052908	0.019952
4	15	0.23542	0.23542	0.329036	0.230919	0.121855	0.053045	0.021605
4	15	0.245347	0.245347	0.321436	0.241094	0.116978	0.049857	0.019301
4	31	0.239717	0.239717	0.320016	0.237667	0.121422	0.051369	0.022385
4	31	0.247586	0.247586	0.317217	0.23089	0.119593	0.05271	0.023305
4	63	0.231493	0.231493	0.313399	0.233822	0.123662	0.06118	0.024189
4	63	0.232834	0.232834	0.315312	0.229341	0.12844	0.05781	0.024875
4	63	0.234912	0.234912	0.319867	0.227868	0.12711	0.055906	0.023762
4	99	0.231672	0.231672	0.322182	0.239338	0.122125	0.054907	0.019925
4	99	0.226551	0.226551	0.31311	0.235493	0.127198	0.058076	0.025537
4	99	0.227905	0.227905	0.319127	0.238265	0.121551	0.057891	0.024171
5	0	0.583999	0.583999	0.307432	0.100464	0.008105	0	0
5	0	0.61792	0.61792	0.318161	0.063919	0	0	0
5	0	0.572656	0.572656	0.309421	0.0997	0.018223	0	0
5	1	0.571345	0.571345	0.311645	0.095615	0.021396	0	0
5	1	0.647445	0.647445	0.271508	0.081114	-6.6e-05	0	0
5	3	0.579096	0.579096	0.335107	0.070584	0.015214	0	0
5	6	0.570603	0.570603	0.308295	0.100929	0.020173	0	0
5	6	0.559606	0.559606	0.316142	0.102542	0.02171	0	0
5	15	0.54655	0.54655	0.318451	0.101132	0.030668	0.003198	0
5	15	0.539165	0.539165	0.351799	0.102605	0.006431	0	0
5	15	0.564101	0.564101	0.299279	0.101374	0.031706	0.00354	0
5	31	0.554928	0.554928	0.314747	0.116415	0.01391	0	0
5	31	0.566597	0.566597	0.297855	0.114663	0.020885	0	0
5	63	0.528097	0.528097	0.316388	0.116477	0.031668	0.007369	0
5	63	0.549147	0.549147	0.310765	0.127484	0.012604	0	0
5	99	0.532079	0.532079	0.300422	0.124294	0.034591	0.008613	0
5	99	0.520463	0.520463	0.310387	0.114383	0.041214	0.013553	0
6	0	0.263932	0.263932	0.330499	0.233863	0.115808	0.04197	0.013928
6	0	0.270245	0.270245	0.356799	0.224982	0.111806	0.031288	0.00488
6	0	0.267597	0.267597	0.331512	0.227731	0.114456	0.04352	0.015184
6	1	0.26442	0.26442	0.331955	0.227607	0.116988	0.044605	0.014424
6	1	0.25944	0.25944	0.331645	0.230919	0.115628	0.047165	0.015203
6	1	0.264716	0.264716	0.333781	0.227025	0.114112	0.043888	0.016478
6	3	0.259464	0.259464	0.327049	0.230566	0.113528	0.046099	0.01785
6	3	0.263421	0.263421	0.329211	0.228619	0.116292	0.047154	0.015302
6	3	0.258511	0.258511	0.332043	0.2264	0.119249	0.04722	0.016578
6	6	0.263212	0.263212	0.32277	0.22594	0.117264	0.0485	0.016391
6	6	0.262228	0.262228	0.325297	0.233121	0.112574	0.045716	0.016317
6	6	0.273018	0.273018	0.350304	0.243646	0.107654	0.023302	0.002075
6	15	0.253887	0.253887	0.318651	0.2321	0.118371	0.049453	0.019903
6	15	0.251922	0.251922	0.320087	0.228304	0.119137	0.050848	0.020353
6	15	0.222041	0.222041	0.360977	0.262342	0.106596	0.042132	0.005911
6	31	0.248969	0.248969	0.323976	0.227485	0.114228	0.053594	0.022667
6	31	0.253174	0.253174	0.315989	0.221133	0.119113	0.055106	0.023926
6	63	0.240015	0.240015	0.302524	0.221589	0.118905	0.05906	0.030554
6	63	0.238116	0.238116	0.303839	0.218741	0.119414	0.062555	0.030378
6	63	0.239397	0.239397	0.303424	0.219668	0.12498	0.057451	0.030786
6	99	0.240095	0.240095	0.303759	0.228472	0.114356	0.057323	0.029024
6	99	0.240459	0.240459	0.288327	0.220589	0.12123	0.066143	0.034336
6	99	0.237202	0.237202	0.304015	0.219907	0.119333	0.05782	0.031931
7	0	0.200695	0.200695	0.32631	0.243664	0.147807	0.047231	0.029652
7	1	0.195527	0.195527	0.333374	0.243613	0.144486	0.059904	0.021328
7	6	0.18363	0.18363	0.316086	0.254262	0.154254	0.064939	0.023663
7	63	0.172123	0.172123	0.297573	0.262729	0.128483	0.056331	0.024108
8	0	0.627899	0.627899	0.27138	0.086095	0.014627	0	0
8	0	0.621209	0.621209	0.28011	0.0772	0.02148	0	0
8	0	0.631835	0.631835	0.265535	0.082707	0.019923	0	0
8	1	0.624351	0.624351	0.278041	0.083949	0.013659	0	0
8	1	0.633913	0.633913	0.269459	0.078786	0.017841	0	0
8	1	0.629598	0.629598	0.270406	0.081191	0.018805	0	0
8	3	0.626542	0.626542	0.275004	0.082112	0.016341	0	0
8	3	0.622328	0.622328	0.270401	0.088268	0.019004	0	0
8	3	0.614781	0.614781	0.275372	0.094598	0.015249	0	0
8	15	0.612654	0.612654	0.267483	0.093897	0.025966	0	0
8	15	0.597014	0.597014	0.281809	0.094448	0.026728	0	0
8	15	0.604418	0.604418	0.281475	0.092346	0.021761	0	0
8	31	0.60398	0.60398	0.276273	0.097293	0.022454	0	0
8	31	0.58982	0.58982	0.287787	0.097802	0.024591	0	0
9	0	0.257323	0.257323	0.299674	0.264222	0.108071	0.047583	0.023128
9	0	0.245739	0.245739	0.339348	0.229572	0.130129	0.042508	0.012704
9	1	0.239712	0.239712	0.346445	0.235653	0.11839	0.047617	0.012182
9	3	0.209665	0.209665	0.316063	0.239679	0.137961	0.057842	0.038789
9	3	0.208293	0.208293	0.348441	0.212452	0.154801	0.059702	0.016312
9	6	0.245579	0.245579	0.325064	0.233766	0.125791	0.041202	0.021561
9	6	0.259901	0.259901	0.301114	0.228289	0.139727	0.04964	0.018383
9	15	0.292493	0.292493	0.31081	0.231067	0.130951	0.03032	0.004359
9	31	0.278592	0.278592	0.299439	0.242906	0.121526	0.043956	0.013582
9	63	0.193662	0.193662	0.226536	0.162272	0.104737	0.034592	0.034517
9	99	0.177095	0.177095	0.204577	0.187036	0.104086	0.056056	0.02474
10	0	0.257889	0.257889	0.323146	0.227705	0.11706	0.050816	0.018818
10	0	0.212737	0.212737	0.330881	0.254378	0.122116	0.054939	0.019766
10	0	0.241485	0.241485	0.332314	0.240987	0.120147	0.049339	0.015727
10	1	0.24984	0.24984	0.312854	0.232619	0.129943	0.05431	0.018109
10	1	0.201402	0.201402	0.322875	0.240654	0.144856	0.062438	0.022793
10	1	0.204916	0.204916	0.322394	0.258516	0.131813	0.057969	0.019139
10	3	0.249283	0.249283	0.323727	0.235055	0.119848	0.04866	0.017746
10	3	0.251501	0.251501	0.337428	0.230613	0.118677	0.045537	0.016244
10	3	0.254916	0.254916	0.327184	0.231082	0.117461	0.054779	0.014579
10	6	0.256266	0.256266	0.326902	0.226977	0.126376	0.04856	0.014919
10	6	0.263005	0.263005	0.336222	0.230102	0.108575	0.04145	0.017729
10	6	0.268215	0.268215	0.305218	0.244703	0.11015	0.048235	0.016041
10	15	0.243149	0.243149	0.326085	0.237954	0.123759	0.048883	0.017155
10	15	0.254214	0.254214	0.315976	0.233685	0.116327	0.053964	0.022061
10	15	0.250421	0.250421	0.330554	0.225487	0.11965	0.04767	0.019368
10	31	0.241112	0.241112	0.339065	0.240356	0.114511	0.048287	0.016669
10	31	0.252669	0.252669	0.317422	0.235496	0.117122	0.0492	0.02129
10	63	0.244949	0.244949	0.315625	0.224612	0.125361	0.052618	0.02459
10	63	0.242328	0.242328	0.313796	0.228319	0.119558	0.058941	0.024871
10	63	0.256026	0.256026	0.321201	0.220507	0.117332	0.051168	0.023261
10	99	0.252795	0.252795	0.308962	0.234516	0.121619	0.051099	0.021532
10	99	0.249568	0.249568	0.317001	0.229108	0.11721	0.05019	0.023114
10	99	0.249745	0.249745	0.325036	0.215639	0.117921	0.05379	0.02506
11	0	0.443685	0.443685	0.319362	0.159335	0.059859	0.017759	0
11	0	0.436757	0.436757	0.316566	0.163189	0.063649	0.019839	0
11	0	0.433175	0.433175	0.316091	0.165027	0.066266	0.019442	0
11	1	0.430557	0.430557	0.320503	0.165298	0.063698	0.019945	0
11	1	0.430407	0.430407	0.317974	0.167208	0.064317	0.020094	0
11	1	0.432508	0.432508	0.314327	0.16809	0.06384	0.021234	0
11	3	0.391563	0.391563	0.315148	0.176619	0.0781	0.029151	0.00942
11	3	0.416954	0.416954	0.31938	0.162861	0.070354	0.023182	0.007269
11	3	0.41602	0.41602	0.319507	0.166332	0.069087	0.022073	0.006983
11	6	0.406027	0.406027	0.317427	0.171169	0.072493	0.02422	0.008664
11	6	0.41423	0.41423	0.319406	0.167679	0.070171	0.021634	0.006881
11	6	0.408333	0.408333	0.31639	0.167523	0.07265	0.028295	0.006809
11	15	0.400476	0.400476	0.318806	0.169762	0.073144	0.028451	0.00936
11	15	0.389313	0.389313	0.315107	0.18042	0.077311	0.026329	0.01152
11	15	0.394806	0.394806	0.3105	0.171512	0.079546	0.032513	0.011123
11	31	0.398077	0.398077	0.322012	0.169506	0.071666	0.02875	0.009989
11	31	0.388589	0.388589	0.311603	0.178948	0.078795	0.030874	0.011191
11	63	0.377611	0.377611	0.30589	0.186203	0.083814	0.033079	0.013403
11	63	0.381262	0.381262	0.305981	0.182445	0.085837	0.031962	0.012512
11	63	0.398863	0.398863	0.308873	0.175863	0.076968	0.029499	0.009933
11	99	0.398473	0.398473	0.310715	0.167089	0.079478	0.033676	0.010569
11	99	0.387726	0.387726	0.307165	0.170507	0.08496	0.036554	0.013088
12	0	0.33207	0.33207	0.367713	0.177715	0.085191	0.036124	0.001188
12	0	0.332655	0.332655	0.357798	0.196433	0.086414	0.024714	0.001986
12	0	0.339189	0.339189	0.367687	0.182836	0.071766	0.026396	0.012126
12	1	0.372538	0.372538	0.34424	0.196364	0.070779	0.016079	0
12	1	0.349043	0.349043	0.334657	0.208058	0.075033	0.025358	0.00785
12	1	0.338763	0.338763	0.365721	0.196643	0.065367	0.024326	0.009181
12	3	0.363085	0.363085	0.316277	0.183369	0.104842	0.021914	0.010513
12	3	0.352309	0.352309	0.335795	0.195289	0.072703	0.035478	0.008425
12	3	0.338714	0.338714	0.346186	0.195919	0.082586	0.025587	0.011008
12	6	0.347903	0.347903	0.352689	0.179406	0.085784	0.027412	0.006805
12	6	0.3395	0.3395	0.337451	0.196297	0.080195	0.030416	0.016141
12	6	0.313576	0.313576	0.357911	0.18264	0.086499	0.034746	0.020469
12	15	0.334776	0.334776	0.323672	0.192012	0.086598	0.038009	0.017643
12	15	0.339645	0.339645	0.345504	0.187497	0.085509	0.029727	0.012118
12	15	0.336198	0.336198	0.348585	0.178938	0.081115	0.039338	0.015827
12	31	0.337953	0.337953	0.320383	0.185017	0.084496	0.039561	0.019627
12	31	0.326655	0.326655	0.330488	0.182472	0.09026	0.038891	0.018294
12	63	0.321965	0.321965	0.330255	0.173058	0.088458	0.046354	0.025174
12	63	0.314871	0.314871	0.327039	0.18416	0.093708	0.041213	0.029393
12	63	0.323601	0.323601	0.323971	0.198693	0.082834	0.038379	0.021717
12	99	0.315999	0.315999	0.320152	0.185668	0.082275	0.047105	0.026415
12	99	0.323036	0.323036	0.31591	0.190188	0.082465	0.048491	0.026966
12	99	0.308862	0.308862	0.30355	0.191931	0.089055	0.048033	0.030897
13	0	0.426484	0.426484	0.332025	0.163581	0.0596	0.01831	0
13	0	0.423552	0.423552	0.332714	0.164772	0.060801	0.01816	0
13	0	0.424441	0.424441	0.330372	0.166016	0.060205	0.018966	0
13	1	0.42419	0.42419	0.330919	0.164955	0.061873	0.018063	0
13	1	0.422361	0.422361	0.329538	0.167517	0.061999	0.018586	0
13	1	0.429655	0.429655	0.328142	0.164841	0.059779	0.017583	0
13	3	0.422739	0.422739	0.330075	0.166303	0.061811	0.019072	0
13	3	0.425718	0.425718	0.330622	0.163887	0.061271	0.018502	0
13	3	0.423827	0.423827	0.331598	0.164506	0.060916	0.019153	0
13	6	0.423395	0.423395	0.331853	0.163488	0.062527	0.018737	0
13	6	0.425864	0.425864	0.330582	0.164136	0.06118	0.018239	0
13	6	0.421563	0.421563	0.334225	0.16449	0.060689	0.019033	0
13	15	0.414698	0.414698	0.32694	0.166227	0.064104	0.021861	0.00617
13	15	0.40982	0.40982	0.32845	0.166871	0.066865	0.02112	0.006874
13	15	0.414475	0.414475	0.327973	0.166	0.06401	0.021429	0.006113
13	31	0.407725	0.407725	0.325807	0.170348	0.065834	0.022942	0.007343
13	31	0.408084	0.408084	0.322859	0.170079	0.067297	0.023725	0.007956
13	63	0.394218	0.394218	0.319493	0.171194	0.074953	0.028754	0.011389
13	63	0.39079	0.39079	0.320142	0.172887	0.076123	0.029126	0.010932
13	63	0.394658	0.394658	0.319856	0.172	0.074354	0.028271	0.01086
13	99	0.394398	0.394398	0.318887	0.171059	0.074009	0.029861	0.011787
13	99	0.389267	0.389267	0.317238	0.175366	0.075738	0.030516	0.011874
13	99	0.385514	0.385514	0.315157	0.173935	0.079075	0.03254	0.01378
14	0	0.408003	0.408003	0.351398	0.162911	0.061286	0.016401	0
14	0	0.38825	0.38825	0.358723	0.150983	0.061067	0.026877	0.014101
14	0	0.395132	0.395132	0.346981	0.16267	0.06039	0.025863	0.008963
14	1	0.398678	0.398678	0.362141	0.162766	0.057638	0.018778	0
14	1	0.376678	0.376678	0.353399	0.164109	0.063368	0.025122	0.017324
14	1	0.357562	0.357562	0.317346	0.142665	0.083576	0.035554	0.031118
14	3	0.39043	0.39043	0.343915	0.174164	0.058128	0.021432	0.01193
14	3	0.375191	0.375191	0.331337	0.15489	0.060534	0.022285	0.02217
14	3	0.374886	0.374886	0.340247	0.172072	0.067472	0.031091	0.014233
14	6	0.391002	0.391002	0.34481	0.154624	0.063239	0.030608	0.015718
14	6	0.391657	0.391657	0.344871	0.176252	0.059082	0.019731	0.008408
14	15	0.373426	0.373426	0.350225	0.168906	0.066498	0.028876	0.012068
14	15	0.36127	0.36127	0.335634	0.175702	0.076962	0.0355	0.014932
14	31	0.362614	0.362614	0.340889	0.174844	0.074905	0.033211	0.013536
14	63	0.345469	0.345469	0.308985	0.17328	0.092432	0.049707	0.021949
14	63	0.344379	0.344379	0.326732	0.166582	0.084386	0.045685	0.022914
14	63	0.349177	0.349177	0.330154	0.162903	0.084266	0.040237	0.022783
14	99	0.344838	0.344838	0.313062	0.162696	0.090536	0.052225	0.025512
14	99	0.337208	0.337208	0.308743	0.168405	0.094895	0.054733	0.024922
14	99	0.340665	0.340665	0.322256	0.167961	0.08473	0.048144	0.02339
15	0	0.393146	0.393146	0.338161	0.176734	0.072485	0.019474	0
15	0	0.384576	0.384576	0.326401	0.181424	0.080135	0.024056	0.003409
15	0	0.37962	0.37962	0.341485	0.179091	0.070179	0.023822	0.005803
15	1	0.392795	0.392795	0.329659	0.17691	0.069688	0.023004	0.007943
15	1	0.375298	0.375298	0.33196	0.187079	0.077442	0.023324	0.004897
15	1	0.373522	0.373522	0.351425	0.173409	0.07408	0.021741	0.005822
15	3	0.366802	0.366802	0.330818	0.204627	0.07111	0.024715	0.001927
15	3	0.376303	0.376303	0.336604	0.185797	0.07712	0.020604	0.003572
15	3	0.376851	0.376851	0.347324	0.175823	0.078825	0.019579	0.001598
15	6	0.385423	0.385423	0.332186	0.183254	0.067413	0.022744	0.008979
15	6	0.381946	0.381946	0.340241	0.186283	0.065896	0.021584	0.00405
15	6	0.385661	0.385661	0.337059	0.172001	0.073362	0.026885	0.005032
15	15	0.364149	0.364149	0.33033	0.190611	0.077948	0.031855	0.005107
15	15	0.36948	0.36948	0.32911	0.18456	0.078492	0.033209	0.00515
15	15	0.370288	0.370288	0.327096	0.185831	0.077621	0.030775	0.008388
15	31	0.377432	0.377432	0.333077	0.173618	0.0824	0.024716	0.008757
15	31	0.369817	0.369817	0.322654	0.190455	0.074434	0.03526	0.007379
15	63	0.357436	0.357436	0.333885	0.176901	0.081822	0.035319	0.014637
15	63	0.344493	0.344493	0.324971	0.192903	0.087166	0.035504	0.014962
15	63	0.354308	0.354308	0.325203	0.193828	0.083629	0.032429	0.010604
15	99	0.345408	0.345408	0.329479	0.187257	0.087484	0.038043	0.012329
15	99	0.357773	0.357773	0.316452	0.193381	0.084518	0.031523	0.016353
15	99	0.351269	0.351269	0.315743	0.190872	0.085717	0.039908	0.01649
16	0	0.769174	0.769174	0.229129	0.001697	0	0	0
16	0	0.318103	0.318103	0.350351	0.211763	0.082766	0.028513	0.008504
16	0	0.406746	0.406746	0.331524	0.164728	0.075403	0.0216	0
16	1	0.406297	0.406297	0.310211	0.186854	0.077701	0.018936	0
16	1	0.31661	0.31661	0.350644	0.201827	0.092701	0.034261	0.003958
16	1	0.324214	0.324214	0.329531	0.206261	0.101372	0.031317	0.007305
16	3	0.367275	0.367275	0.354082	0.174453	0.095084	0.009106	0
16	3	0.330099	0.330099	0.349603	0.202806	0.086605	0.025229	0.005658
16	3	0.314914	0.314914	0.348338	0.202545	0.097674	0.030342	0.006187
16	6	0.308746	0.308746	0.337238	0.232478	0.091695	0.027316	0.002527
16	6	0.309834	0.309834	0.354641	0.196719	0.095058	0.033837	0.00991
16	6	0.314366	0.314366	0.35607	0.213637	0.099534	0.016392	0
16	15	0.318711	0.318711	0.354296	0.196464	0.087331	0.034365	0.008834
16	15	0.31622	0.31622	0.345533	0.199562	0.09371	0.033025	0.01195
16	15	0.32199	0.32199	0.34084	0.199005	0.090847	0.034287	0.013031
16	31	0.312697	0.312697	0.330586	0.205518	0.093085	0.035186	0.018234
16	31	0.334976	0.334976	0.31441	0.202345	0.097954	0.036398	0.013917
16	63	0.302044	0.302044	0.320093	0.203626	0.094816	0.041266	0.024116
16	63	0.28739	0.28739	0.326373	0.207887	0.103469	0.043754	0.023334
16	63	0.292525	0.292525	0.327298	0.210658	0.098643	0.038618	0.021862
16	99	0.301657	0.301657	0.33462	0.196843	0.091402	0.04222	0.020777
16	99	0.295078	0.295078	0.305366	0.197529	0.097974	0.052102	0.026917
16	99	0.2709	0.2709	0.320957	0.205713	0.107699	0.052013	0.029256
17	0	0.427795	0.427795	0.347852	0.160677	0.05533	0.008345	0
17	0	0.430863	0.430863	0.35444	0.149788	0.051103	0.013807	0
17	0	0.432883	0.432883	0.33268	0.16751	0.053495	0.013432	0
17	1	0.410689	0.410689	0.356138	0.164692	0.053246	0.015236	0
17	1	0.419998	0.419998	0.341071	0.171522	0.055166	0.012243	0
17	1	0.429965	0.429965	0.347605	0.156249	0.051244	0.014937	0
17	3	0.00795134	0.007951	0.40696	0.326481	0.16615	0.065363	0.020528
17	3	0.419683	0.419683	0.351932	0.15669	0.053584	0.018112	0
17	3	0.427337	0.427337	0.342978	0.161501	0.052937	0.015247	0
17	6	0.423276	0.423276	0.343989	0.165057	0.052764	0.014915	0
17	6	0.440642	0.440642	0.339442	0.155741	0.050015	0.014159	0
17	6	0.416374	0.416374	0.347291	0.164805	0.054776	0.016754	0
17	15	0.421755	0.421755	0.344832	0.159985	0.05562	0.017808	0
17	15	0.413295	0.413295	0.346756	0.165746	0.055173	0.01903	0
17	15	0.434169	0.434169	0.336531	0.160077	0.051697	0.017525	0
17	31	0.42253	0.42253	0.322647	0.167535	0.059985	0.022301	0.005002
17	31	0.00846512	0.008465	0.403372	0.324368	0.171644	0.068335	0.021533
17	63	0.393676	0.393676	0.333633	0.167373	0.064464	0.02857	0.012285
17	63	0.406795	0.406795	0.328848	0.165689	0.065965	0.024698	0.008005
17	63	0.4042	0.4042	0.335556	0.161493	0.062026	0.02705	0.009675
17	99	0.405897	0.405897	0.341564	0.160484	0.059238	0.023543	0.009273
17	99	0.394586	0.394586	0.327129	0.171365	0.071529	0.02365	0.011742
18	0	0.429642	0.429642	0.353216	0.147006	0.049683	0.020453	0
18	0	0.431061	0.431061	0.348616	0.161279	0.045137	0.013907	0
18	0	0.452671	0.452671	0.335382	0.147602	0.045456	0.018889	0
18	1	0.434916	0.434916	0.350917	0.148011	0.051479	0.014677	0
18	1	0.434007	0.434007	0.341047	0.15603	0.047502	0.021414	0
18	1	0.430172	0.430172	0.342178	0.157688	0.052256	0.017706	0
18	3	0.439844	0.439844	0.327	0.165353	0.049878	0.017925	0
18	3	0.444671	0.444671	0.332654	0.14532	0.045903	0.024537	0.006914
18	6	0.430502	0.430502	0.335916	0.154171	0.04589	0.025211	0.00831
18	6	0.435527	0.435527	0.34003	0.159199	0.043874	0.02137	0
18	6	0.413672	0.413672	0.351484	0.156426	0.058972	0.019445	0
18	15	0.411822	0.411822	0.328489	0.164133	0.06131	0.024794	0.009451
18	15	0.406526	0.406526	0.312923	0.17145	0.064818	0.029966	0.014318
18	15	0.39867	0.39867	0.332025	0.158597	0.06699	0.030424	0.013294
18	31	0.383411	0.383411	0.321428	0.174925	0.067581	0.034893	0.017762
18	31	0.390489	0.390489	0.315319	0.160942	0.074519	0.040845	0.017886
18	63	0.34316	0.34316	0.29789	0.17319	0.095126	0.057961	0.023224
18	63	0.350701	0.350701	0.305221	0.163049	0.096224	0.054035	0.024239
18	63	0.365736	0.365736	0.303341	0.173176	0.087724	0.043925	0.019191
18	99	0.33261	0.33261	0.291475	0.186949	0.096844	0.055468	0.026869
18	99	0.338045	0.338045	0.300635	0.168818	0.104662	0.05363	0.026178
18	99	0.317987	0.317987	0.301669	0.178191	0.103398	0.062398	0.023554
19	0	0.28769	0.28769	0.341308	0.221226	0.101574	0.036813	0.011389
19	0	0.287857	0.287857	0.339919	0.222054	0.101489	0.037196	0.011486
19	0	0.290412	0.290412	0.341123	0.219726	0.101149	0.036414	0.011176
19	1	0.284263	0.284263	0.344289	0.221888	0.101854	0.036598	0.011108
19	1	0.284156	0.284156	0.341902	0.222995	0.102017	0.037406	0.011524
19	1	0.28723	0.28723	0.341982	0.219714	0.103047	0.036503	0.011524
19	3	0.280127	0.280127	0.336687	0.223813	0.105218	0.040143	0.014012
19	3	0.282725	0.282725	0.339882	0.221918	0.105124	0.038571	0.011779
19	3	0.281888	0.281888	0.341509	0.221631	0.103542	0.038721	0.012709
19	6	0.280868	0.280868	0.338519	0.222501	0.105869	0.039565	0.012678
19	6	0.278822	0.278822	0.339288	0.224343	0.105604	0.039396	0.012548
19	6	0.280194	0.280194	0.337927	0.222752	0.104962	0.040972	0.013192
19	15	0.26913	0.26913	0.333053	0.225804	0.11089	0.044711	0.016412
19	15	0.265745	0.265745	0.328406	0.224502	0.110391	0.045914	0.017966
19	15	0.267618	0.267618	0.330679	0.224591	0.108571	0.044641	0.017398
19	31	0.303847	0.303847	0.308929	0.220976	0.105578	0.037878	0.020515
19	31	0.258941	0.258941	0.325903	0.221426	0.113879	0.049206	0.020959
19	63	0.248369	0.248369	0.315559	0.220056	0.118185	0.056285	0.027917
19	63	0.251915	0.251915	0.31437	0.219982	0.116742	0.056173	0.027013
19	63	0.247925	0.247925	0.316775	0.222213	0.119193	0.054929	0.026433
19	99	0.249768	0.249768	0.315808	0.221096	0.116125	0.055497	0.02721
19	99	0.242755	0.242755	0.309906	0.220776	0.121807	0.059202	0.030221
19	99	0.241717	0.241717	0.304754	0.217675	0.118782	0.057886	0.031466
20	0	0.49496	0.49496	0.334949	0.127393	0.035195	0.007503	0
20	0	0.494461	0.494461	0.345592	0.126361	0.026799	0.006787	0
20	0	0.498129	0.498129	0.335165	0.131173	0.032641	0.002892	0
20	1	0.494645	0.494645	0.333605	0.128103	0.035741	0.007907	0
20	1	0.496011	0.496011	0.33302	0.127049	0.035854	0.008066	0
20	1	0.492847	0.492847	0.352195	0.115644	0.030737	0.008578	0
20	3	0.493706	0.493706	0.341306	0.122989	0.037754	0.004245	0
20	3	0.492952	0.492952	0.333403	0.129128	0.036076	0.008441	0
20	3	0.482838	0.482838	0.326888	0.128901	0.030046	0.025565	0.005762
20	6	0.492784	0.492784	0.330057	0.124673	0.031884	0.020601	0
20	6	0.492226	0.492226	0.333177	0.129041	0.037022	0.008534	0
20	6	0.492785	0.492785	0.331192	0.129478	0.037941	0.008604	0
20	15	0.484844	0.484844	0.330307	0.13318	0.040855	0.010813	0
20	15	0.480846	0.480846	0.330994	0.135023	0.041573	0.011565	0
20	15	0.483037	0.483037	0.329796	0.134196	0.04201	0.010961	0
20	31	0.47861	0.47861	0.328473	0.135177	0.044494	0.013246	0
20	31	0.473931	0.473931	0.328294	0.137581	0.045952	0.014242	0
20	63	0.458814	0.458814	0.324553	0.144104	0.05416	0.01837	0
20	63	0.458825	0.458825	0.324906	0.143659	0.053648	0.018962	0
20	63	0.454642	0.454642	0.327933	0.132405	0.05027	0.024168	0.010582
20	99	0.460684	0.460684	0.325044	0.14222	0.053249	0.018803	0
20	99	0.452359	0.452359	0.325239	0.147404	0.056225	0.018772	0
20	99	0.45109	0.45109	0.322613	0.146179	0.058541	0.021576	0
21	0	0.704172	0.704172	0.21367	0.071386	0.010772	0	0
21	6	0.705581	0.705581	0.212331	0.076693	0.005395	0	0
21	6	0.581612	0.581612	0.364241	0.054147	0	0	0
21	15	0.590068	0.590068	0.257219	0.120054	0.032659	0	0
21	15	0.600802	0.600802	0.293203	0.09766	0.008335	0	0
21	15	0.573163	0.573163	0.289474	0.118697	0.018667	0	0
21	31	0.510729	0.510729	0.304584	0.125297	0.055664	0.003726	0
21	63	0.469154	0.469154	0.311843	0.177444	0.034131	0.007428	0
21	63	0.556588	0.556588	0.271254	0.163536	0.008621	0	0
21	99	0.447919	0.447919	0.354863	0.177768	0.01945	0	0
22	0	0.583025	0.583025	0.287175	0.10272	0.027081	0	0
22	0	0.583502	0.583502	0.292122	0.097505	0.026871	0	0
22	0	0.585872	0.585872	0.290931	0.098036	0.025162	0	0
22	1	0.582284	0.582284	0.287141	0.104401	0.026174	0	0
22	1	0.581695	0.581695	0.288823	0.102148	0.027334	0	0
22	1	0.586697	0.586697	0.284927	0.104982	0.023393	0	0
22	3	0.570975	0.570975	0.283781	0.100852	0.034308	0.010084	0
22	3	0.57049	0.57049	0.284798	0.097391	0.03528	0.01204	0
22	15	0.534906	0.534906	0.278825	0.104231	0.059779	0.02226	0
22	15	0.523619	0.523619	0.280911	0.103663	0.068284	0.023523	0
22	15	0.509959	0.509959	0.269761	0.097383	0.079479	0.032616	0.010804
22	31	0.495355	0.495355	0.261093	0.101084	0.08946	0.041528	0.01148
22	31	0.505188	0.505188	0.287481	0.102711	0.068617	0.029856	0.006148
22	99	0.463962	0.463962	0.296484	0.132275	0.067236	0.028722	0.011322
23	0	0.336966	0.336966	0.344729	0.202092	0.08488	0.024694	0.006639
23	0	0.324223	0.324223	0.353625	0.207391	0.082684	0.025899	0.006177
23	0	0.328632	0.328632	0.346347	0.205905	0.083807	0.028277	0.007031
23	1	0.337299	0.337299	0.341778	0.20633	0.080107	0.02692	0.007567
23	1	0.315589	0.315589	0.358116	0.200784	0.088988	0.029912	0.006611
23	1	0.325181	0.325181	0.34326	0.216939	0.085771	0.025906	0.002942
23	3	0.321024	0.321024	0.336453	0.211816	0.090134	0.028993	0.011581
23	3	0.339636	0.339636	0.340553	0.218404	0.078219	0.018341	0.004847
23	3	0.331784	0.331784	0.340552	0.201706	0.090825	0.029522	0.005612
23	6	0.308422	0.308422	0.363552	0.201437	0.098555	0.023777	0.004256
23	6	0.311627	0.311627	0.348451	0.216884	0.082127	0.035836	0.005075
23	6	0.318478	0.318478	0.343018	0.222803	0.085307	0.026314	0.004079
23	15	0.306538	0.306538	0.344547	0.2101	0.096404	0.029598	0.012813
23	15	0.326632	0.326632	0.3267	0.208918	0.091034	0.038376	0.00834
23	15	0.317618	0.317618	0.374793	0.195235	0.078227	0.026332	0.007795
23	31	0.317127	0.317127	0.32666	0.20417	0.095176	0.043384	0.013484
23	31	0.297633	0.297633	0.331518	0.196588	0.109011	0.040822	0.018178
23	63	0.2876	0.2876	0.314687	0.208148	0.100636	0.051387	0.027745
23	63	0.271847	0.271847	0.324755	0.204701	0.105083	0.052573	0.025724
23	63	0.268621	0.268621	0.331214	0.201467	0.112034	0.048076	0.026152
23	99	0.248353	0.248353	0.29648	0.225761	0.10948	0.064189	0.028696
23	99	0.25003	0.25003	0.31762	0.213545	0.113293	0.060861	0.030003
23	99	0.262666	0.262666	0.29552	0.211651	0.114721	0.053836	0.032905
24	0	0.588442	0.588442	0.283867	0.101093	0.026597	0	0
24	0	0.590107	0.590107	0.284524	0.099882	0.025487	0	0
24	0	0.587705	0.587705	0.285154	0.101404	0.025737	0	0
24	1	0.588174	0.588174	0.285304	0.100268	0.026254	0	0
24	1	0.59156	0.59156	0.282364	0.099453	0.026623	0	0
24	1	0.589235	0.589235	0.282946	0.101155	0.026663	0	0
24	3	0.586291	0.586291	0.286409	0.100402	0.026899	0	0
24	3	0.58532	0.58532	0.288496	0.099807	0.026377	0	0
24	3	0.598876	0.598876	0.282489	0.096092	0.022542	0	0
24	6	0.578491	0.578491	0.297838	0.097448	0.026223	0	0
24	6	0.58454	0.58454	0.288177	0.099747	0.027536	0	0
24	6	0.589011	0.589011	0.284439	0.100308	0.026242	0	0
24	15	0.584675	0.584675	0.285364	0.101604	0.028358	0	0
24	15	0.579603	0.579603	0.289927	0.102883	0.027586	0	0
24	15	0.582006	0.582006	0.288779	0.100735	0.02848	0	0
24	31	0.56977	0.56977	0.28796	0.107287	0.029236	0.005748	0
24	31	0.535825	0.535825	0.301831	0.122086	0.032902	0.007356	0
24	63	0.561781	0.561781	0.29288	0.106942	0.031228	0.007168	0
24	63	0.514589	0.514589	0.304864	0.124428	0.045415	0.010704	0
24	63	0.51536	0.51536	0.304481	0.129745	0.039933	0.010481	0
24	99	0.565112	0.565112	0.292045	0.106219	0.029301	0.007323	0
24	99	0.494688	0.494688	0.307338	0.135735	0.048772	0.013468	0
24	99	0.552811	0.552811	0.293649	0.113774	0.032132	0.007634	0
25	0	0.434573	0.434573	0.331219	0.156522	0.060633	0.017053	0
25	0	0.421852	0.421852	0.341253	0.165336	0.056801	0.014758	0
25	0	0.414375	0.414375	0.350472	0.164846	0.054371	0.015936	0
25	1	0.431644	0.431644	0.339636	0.16033	0.056229	0.01216	0
25	1	0.423224	0.423224	0.344403	0.160343	0.057534	0.014496	0
25	1	0.406423	0.406423	0.344693	0.172744	0.058298	0.017842	0
25	3	0.428608	0.428608	0.348931	0.155309	0.053529	0.013622	0
25	3	0.431562	0.431562	0.332076	0.163083	0.05744	0.015839	0
25	3	0.419638	0.419638	0.34172	0.164943	0.057311	0.016388	0
25	6	0.44061	0.44061	0.33013	0.155567	0.054919	0.018775	0
25	6	0.429147	0.429147	0.335879	0.167717	0.056014	0.011243	0
25	15	0.425897	0.425897	0.321498	0.159004	0.061346	0.025246	0.007009
25	15	0.408538	0.408538	0.33546	0.161256	0.063587	0.022749	0.00841
25	15	0.383193	0.383193	0.34931	0.17193	0.066784	0.021266	0.007516
25	31	0.403168	0.403168	0.322152	0.175118	0.063025	0.023338	0.013198
25	31	0.394457	0.394457	0.333359	0.168931	0.068736	0.02285	0.011666
25	63	0.380197	0.380197	0.326448	0.167106	0.073405	0.036148	0.016695
25	63	0.386215	0.386215	0.323334	0.166527	0.072478	0.035524	0.015923
25	63	0.373082	0.373082	0.325818	0.171767	0.077344	0.037441	0.014548
25	99	0.383961	0.383961	0.30772	0.170515	0.071003	0.039776	0.020263
25	99	0.373934	0.373934	0.322632	0.170298	0.075857	0.038681	0.018599
25	99	0.354148	0.354148	0.321988	0.160253	0.095645	0.037846	0.023533
26	0	0.467356	0.467356	0.353058	0.149441	0.030145	0	0
26	0	0.534958	0.534958	0.348573	0.116469	0	0	0
26	0	0.557544	0.557544	0.340867	0.08543	0.016159	0	0
26	1	0.409855	0.409855	0.376016	0.161315	0.052815	0	0
26	1	0.409346	0.409346	0.345451	0.184209	0.056939	0.004055	0
26	1	0.397508	0.397508	0.34448	0.175904	0.077587	0.004521	0
26	3	0.306783	0.306783	0.327286	0.228239	0.123744	0.013948	0
26	3	0.328874	0.328874	0.364468	0.209231	0.085947	0.01148	0
26	3	0.414785	0.414785	0.336103	0.178649	0.056704	0.013758	0
26	15	0.529409	0.529409	0.319914	0.096735	0.040735	0.013208	0
26	63	0.371152	0.371152	0.126803	0.204883	0.043452	0.021097	0.128742
26	99	0.536101	0.536101	0.295601	0.09138	0.059726	0.017192	0
26	99	0.267356	0.267356	0.226287	0.159179	0.05119	0.042764	0.122719
27	0	0.648332	0.648332	0.265968	0.077306	0.008393	0	0
27	0	0.610042	0.610042	0.283707	0.08731	0.018941	0	0
27	0	0.638122	0.638122	0.265426	0.095213	0.001239	0	0
27	1	0.589315	0.589315	0.297459	0.09207	0.021156	0	0
27	1	0.606694	0.606694	0.306498	0.086807	0	0	0
27	1	0.590711	0.590711	0.302979	0.085978	0.020333	0	0
27	3	0.568267	0.568267	0.300446	0.123613	0.007673	0	0
27	3	0.618388	0.618388	0.290457	0.082494	0.00866	0	0
27	6	0.606709	0.606709	0.294404	0.078795	0.020091	0	0
27	6	0.643597	0.643597	0.263482	0.082821	0.0101	0	0
27	15	0.462551	0.462551	0.335613	0.143847	0.046815	0.011175	0
27	15	0.587519	0.587519	0.310882	0.092959	0.00864	0	0
27	15	0.599969	0.599969	0.294884	0.091303	0.013843	0	0
27	31	0.385782	0.385782	0.338885	0.194924	0.063963	0.016447	0
27	31	0.573975	0.573975	0.294932	0.107316	0.023778	0	0
27	99	0.293407	0.293407	0.351276	0.223899	0.100642	0.02791	0.002867
28	0	0.588442	0.588442	0.283867	0.101093	0.026597	0	0
28	1	0.59156	0.59156	0.282364	0.099453	0.026623	0	0
28	3	0.59085	0.59085	0.286434	0.096095	0.026621	0	0
28	15	0.584675	0.584675	0.285364	0.101604	0.028358	0	0
28	15	0.579603	0.579603	0.289927	0.102883	0.027586	0	0
28	31	0.56977	0.56977	0.28796	0.107287	0.029236	0.005748	0
28	31	0.535825	0.535825	0.301831	0.122086	0.032902	0.007356	0
28	63	0.561781	0.561781	0.29288	0.106942	0.031228	0.007168	0
28	63	0.51536	0.51536	0.304481	0.129745	0.039933	0.010481	0
28	99	0.514491	0.514491	0.291385	0.132903	0.048443	0.012778	0
29	0	0.00504035	0.00504	0.225667	0.299642	0.247649	0.145265	0.055365
29	0	0.0076053	0.007605	0.217505	0.326959	0.246483	0.143401	0.045131
29	0	0.215738	0.215738	0.318534	0.246508	0.134786	0.056808	0.021739
29	1	0.2493	0.2493	0.078632	0.469732	0.190817	0.011518	0
29	1	0.210984	0.210984	0.31364	0.247982	0.138327	0.05891	0.02362
29	1	0.0182049	0.018205	0.197618	0.340508	0.250909	0.123573	0.052865
29	3	0.220007	0.220007	0.299845	0.232828	0.144724	0.070792	0.02419
29	3	0.0508293	0.050829	0.1917	0.327875	0.185911	0.100179	0.071963
29	3	0.211231	0.211231	0.310933	0.242776	0.141066	0.062395	0.023848
29	6	0.210891	0.210891	0.307418	0.246554	0.142623	0.06333	0.022279
29	6	0.216086	0.216086	0.311053	0.240503	0.139028	0.066201	0.023431
29	6	0.195841	0.195841	0.313309	0.238635	0.157789	0.062989	0.025886
29	15	0.193688	0.193688	0.305202	0.251026	0.143108	0.069291	0.026636
29	15	0.195928	0.195928	0.309849	0.232675	0.143655	0.072222	0.032275
29	15	0.198334	0.198334	0.30598	0.248884	0.135875	0.067854	0.031853
29	31	0.19053	0.19053	0.300661	0.246234	0.143773	0.07366	0.030797
29	31	0.00369132	0.003691	0.166263	0.307539	0.231127	0.170544	0.079145
29	63	0.176761	0.176761	0.281786	0.22936	0.146068	0.078105	0.042645
29	63	0.175862	0.175862	0.282456	0.240315	0.145496	0.080827	0.041282
29	63	0.18116	0.18116	0.284201	0.238265	0.145108	0.07895	0.038745
29	99	0.17655	0.17655	0.275581	0.239362	0.146657	0.076041	0.039883
29	99	0.174181	0.174181	0.277599	0.235507	0.142568	0.080013	0.044708
29	99	0.00732695	0.007327	0.188546	0.281898	0.225361	0.132651	0.060408
30	0	0.222788	0.222788	0.293617	0.223701	0.178152	0.029808	0.048526
30	0	0.229249	0.229249	0.335277	0.230657	0.189514	0.015303	0
30	1	0.227239	0.227239	0.346104	0.238207	0.171931	0.01652	0
30	3	0.237645	0.237645	0.308834	0.235808	0.149446	0.040694	0.024801
30	3	0.196914	0.196914	0.302805	0.212307	0.197118	0.024811	0.059385
30	3	0.220416	0.220416	0.32752	0.206632	0.174137	0.029716	0.041747
30	6	0.21856	0.21856	0.301423	0.245237	0.158423	0.04462	0.028853
30	6	0.216776	0.216776	0.315295	0.261037	0.16441	0.027898	0.014583
30	6	0.221884	0.221884	0.316259	0.218421	0.145767	0.056176	0.038957
30	15	0.232384	0.232384	0.322079	0.223201	0.147458	0.033751	0.039841
30	15	0.199041	0.199041	0.31593	0.214623	0.176435	0.033094	0.058264
30	15	0.209007	0.209007	0.32392	0.20755	0.185661	0.027967	0.045403
30	31	0.196438	0.196438	0.305428	0.217333	0.186811	0.037447	0.055018
30	63	0.202912	0.202912	0.297204	0.197819	0.188457	0.03956	0.074076
30	63	0.217282	0.217282	0.328164	0.251839	0.147288	0.01956	0.033432
30	63	0.192919	0.192919	0.315695	0.21242	0.162751	0.04734	0.068874
30	99	0.172981	0.172981	0.277823	0.22254	0.208217	0.030526	0.086041
30	99	0.216442	0.216442	0.299319	0.226345	0.171516	0.036965	0.049413
30	99	0.223126	0.223126	0.306369	0.228623	0.151466	0.050035	0.03579
31	0	0.356533	0.356533	0.348961	0.190243	0.075868	0.022389	0.006006
31	0	0.360243	0.360243	0.345086	0.191336	0.074597	0.022544	0.006194
31	0	0.365966	0.365966	0.348783	0.182985	0.07394	0.022317	0.006008
31	1	0.362669	0.362669	0.344311	0.191373	0.073366	0.021192	0.00709
31	1	0.358674	0.358674	0.348941	0.191353	0.071875	0.02299	0.006168
31	1	0.359359	0.359359	0.347356	0.189404	0.074	0.024118	0.005763
31	3	0.353708	0.353708	0.343547	0.188544	0.081566	0.024544	0.008091
31	3	0.353749	0.353749	0.3507	0.193283	0.074041	0.022144	0.006084
31	3	0.364503	0.364503	0.348932	0.181187	0.073603	0.024403	0.007372
31	6	0.363348	0.363348	0.344438	0.190148	0.074842	0.022162	0.005063
31	6	0.351907	0.351907	0.348189	0.194282	0.076565	0.023113	0.005942
31	6	0.355425	0.355425	0.358087	0.180426	0.073556	0.027118	0.005388
31	15	0.356269	0.356269	0.34336	0.186653	0.080799	0.024279	0.00864
31	15	0.34505	0.34505	0.344014	0.192066	0.08194	0.027179	0.009751
31	15	0.354959	0.354959	0.343251	0.185903	0.079339	0.028385	0.008163
31	31	0.347688	0.347688	0.341952	0.19417	0.075934	0.029266	0.010989
31	31	0.34084	0.34084	0.338787	0.19611	0.08111	0.030388	0.012766
31	63	0.334986	0.334986	0.339472	0.184332	0.088375	0.036031	0.016804
31	63	0.338868	0.338868	0.332176	0.19696	0.08021	0.035649	0.016137
31	63	0.34357	0.34357	0.338205	0.192556	0.08155	0.032051	0.012067
31	99	0.347604	0.347604	0.338454	0.188912	0.079495	0.031815	0.01372
31	99	0.337502	0.337502	0.330927	0.188877	0.083883	0.032598	0.017892
31	99	0.335619	0.335619	0.32674	0.192868	0.082451	0.035673	0.019366
32	0	0.330669	0.330669	0.351646	0.197525	0.085656	0.026456	0.008048
32	0	0.336141	0.336141	0.335691	0.206861	0.087596	0.029982	0.003729
32	0	0.331541	0.331541	0.352866	0.196859	0.086924	0.025343	0.006467
32	1	0.3323	0.3323	0.355962	0.197651	0.077358	0.029444	0.007285
32	1	0.313276	0.313276	0.368409	0.206995	0.084135	0.019875	0.00731
32	1	0.360167	0.360167	0.359101	0.179341	0.074681	0.020071	0.006638
32	3	0.326076	0.326076	0.353233	0.200084	0.080486	0.033163	0.006958
32	3	0.365595	0.365595	0.342293	0.184653	0.075529	0.029688	0.002243
32	3	0.335245	0.335245	0.333502	0.202688	0.090403	0.030562	0.0076
32	6	0.318369	0.318369	0.366132	0.196315	0.079613	0.034595	0.004977
32	6	0.336346	0.336346	0.348249	0.203817	0.085097	0.023162	0.003329
32	6	0.324257	0.324257	0.351547	0.200886	0.089492	0.024617	0.009201
32	15	0.310648	0.310648	0.341978	0.213823	0.093369	0.028478	0.011704
32	15	0.289634	0.289634	0.411016	0.187281	0.099129	0.01294	0
32	15	0.31042	0.31042	0.366211	0.209066	0.080188	0.029649	0.004466
32	31	0.31184	0.31184	0.348682	0.208214	0.086774	0.035379	0.009111
32	31	0.320973	0.320973	0.32614	0.206483	0.095549	0.03927	0.011585
32	63	0.296473	0.296473	0.332998	0.198574	0.106505	0.038767	0.018353
32	63	0.291182	0.291182	0.332392	0.205575	0.100772	0.042861	0.018771
32	63	0.301387	0.301387	0.322944	0.210209	0.100011	0.046408	0.016688
32	99	0.301647	0.301647	0.321059	0.226151	0.087165	0.036391	0.018755
32	99	0.302996	0.302996	0.328916	0.211897	0.100042	0.041643	0.014506
32	99	0.290016	0.290016	0.334363	0.209038	0.097697	0.042221	0.019339
33	0	0.176791	0.176791	0.11602	0.050687	0.016877	0.639625	0
33	0	0.172459	0.172459	0.110745	0.049243	0.014438	0.653145	-3e-05
33	0	0.185809	0.185809	0.118279	0.047693	0.017144	0.630243	0.000832
33	1	0.166422	0.166422	0.120589	0.063252	0.022107	0.625916	0.001715
33	1	0.19752	0.19752	0.151291	0.066147	0.036458	0.548708	-0.000123
33	1	0.096971	0.096971	0.069639	0.041614	0.00978	0.781424	0.000573
33	3	0.12723	0.12723	0.137681	0.084968	0.040945	0.599672	0.009503
33	3	0.245398	0.245398	0.207978	0.127873	0.057773	0.356492	0.004486
33	6	0.193455	0.193455	0.180937	0.096604	0.049199	0.474839	0.004966
33	6	0.363711	0.363711	0.33668	0.194876	0.08079	0.018297	0.005647
33	15	0.354843	0.354843	0.323894	0.178868	0.091229	0.048352	0.002816
33	15	0.303697	0.303697	0.301861	0.195596	0.070767	0.124752	0.003326
33	15	0.31105	0.31105	0.288703	0.203905	0.095365	0.097007	0.003969
33	31	0.412742	0.412742	0.327676	0.144165	0.122274	-0.006858	0
33	31	0.294767	0.294767	0.268827	0.199911	0.104264	0.124391	0.00784
33	63	0.298019	0.298019	0.192535	0.166197	0.107887	0.226008	0.009354
33	63	0.399066	0.399066	0.320066	0.198877	0.082461	-0.00047	0
33	63	0.362961	0.362961	0.348813	0.201332	0.106068	-0.019175	0
33	99	0.32869	0.32869	0.311024	0.218793	0.115458	0.019511	0.017713
34	0	0.00741503	0.007415	0.323601	0.345076	0.200522	0.092631	0.027744
34	0	0.331151	0.331151	0.351258	0.203517	0.086838	0.026516	0.000719
34	1	0.328723	0.328723	0.349253	0.203569	0.089201	0.025055	0.0042
34	1	0.313447	0.313447	0.354591	0.20931	0.09051	0.02886	0.003281
34	1	0.317066	0.317066	0.346852	0.203077	0.090387	0.03652	0.006098
34	3	0.319096	0.319096	0.362115	0.199188	0.083662	0.030411	0.005528
34	3	0.309802	0.309802	0.365276	0.212681	0.081523	0.026558	0.00416
34	3	0.317704	0.317704	0.36233	0.199636	0.085493	0.028086	0.006751
34	6	0.311624	0.311624	0.352464	0.20812	0.085801	0.034275	0.007717
34	6	0.316412	0.316412	0.347835	0.219867	0.082104	0.028185	0.005597
34	6	0.326337	0.326337	0.354765	0.202145	0.086174	0.025665	0.004915
34	15	0.022237	0.022237	0.347206	0.336453	0.195335	0.077702	0.019378
34	15	0.321427	0.321427	0.340728	0.203451	0.091531	0.03387	0.008992
34	31	0.0490243	0.049024	0.066436	0.3495	0.336325	0.172709	0.018802
34	31	0.315774	0.315774	0.323185	0.21233	0.101391	0.034549	0.012772
34	63	0.294068	0.294068	0.3317	0.208134	0.094785	0.043182	0.01855
34	63	0.306369	0.306369	0.324014	0.207221	0.102338	0.038523	0.017147
34	99	0.298498	0.298498	0.331158	0.217104	0.097096	0.039966	0.016177
35	0	0.400757	0.400757	0.346264	0.172671	0.073133	0.007175	0
35	0	0.404458	0.404458	0.358584	0.18646	0.043285	0.007214	0
35	0	0.39736	0.39736	0.369109	0.167952	0.058324	0.007256	0
35	1	0.323196	0.323196	0.329559	0.209016	0.102229	0.032515	0.003486
35	1	0.404609	0.404609	0.364447	0.168495	0.058444	0.004005	0
35	1	0.410841	0.410841	0.308289	0.172395	0.090593	0.017882	0
35	3	0.44647	0.44647	0.404466	0.128832	0.020233	0	0
35	3	0.421397	0.421397	0.349951	0.182974	0.042907	0.00277	0
35	3	0.405323	0.405323	0.372833	0.164172	0.04136	0.016312	0
35	6	0.396245	0.396245	0.365533	0.201391	0.033781	0.00305	0
35	6	0.402256	0.402256	0.361666	0.172681	0.05275	0.010648	0
35	6	0.418699	0.418699	0.364912	0.167889	0.048499	0	0
35	15	0.400033	0.400033	0.377458	0.181315	0.041194	0	0
35	15	0.394195	0.394195	0.357411	0.183988	0.054093	0.010313	0
35	15	0.360785	0.360785	0.312239	0.193759	0.084716	0.031606	0.016895
35	31	0.379298	0.379298	0.340545	0.209268	0.068438	0.002452	0
35	31	0.388628	0.388628	0.347084	0.180307	0.071921	0.01206	0
35	63	0.370873	0.370873	0.350626	0.190336	0.072329	0.015836	0
35	63	0.392243	0.392243	0.329732	0.192554	0.067576	0.017895	0
35	63	0.393612	0.393612	0.29579	0.17721	0.077314	0.038919	0.017155
35	99	0.297718	0.297718	0.296223	0.203027	0.117595	0.048921	0.024067
35	99	0.366777	0.366777	0.284466	0.173998	0.098302	0.048574	0.021174
35	99	0.324904	0.324904	0.27295	0.195618	0.116126	0.055517	0.024531
36	0	0.52088	0.52088	0.313501	0.128496	0.030832	0.00629	0
36	0	0.519742	0.519742	0.314762	0.128363	0.030888	0.006245	0
36	0	0.528042	0.528042	0.314411	0.122591	0.028431	0.006524	0
36	1	0.497302	0.497302	0.343287	0.121553	0.0322	0.005658	0
36	1	0.515943	0.515943	0.32782	0.119936	0.03216	0.004141	0
36	1	0.499257	0.499257	0.335132	0.123431	0.034904	0.007275	0
36	3	0.48471	0.48471	0.34131	0.126803	0.038404	0.008773	0
36	3	0.52328	0.52328	0.317094	0.121448	0.035639	0.002539	0
36	3	0.498078	0.498078	0.340653	0.117493	0.039988	0.003789	0
36	6	0.504404	0.504404	0.321721	0.128711	0.035222	0.009942	0
36	6	0.505287	0.505287	0.334708	0.11897	0.033556	0.007478	0
36	15	0.5025	0.5025	0.323716	0.131738	0.038579	0.003467	0
36	15	0.500932	0.500932	0.311789	0.132726	0.040244	0.01431	0
36	15	0.497499	0.497499	0.322251	0.125136	0.048656	0.006458	0
36	31	0.496923	0.496923	0.310188	0.132474	0.04442	0.015995	0
36	31	0.493299	0.493299	0.312212	0.128967	0.047289	0.018232	0
36	63	0.46216	0.46216	0.321814	0.127689	0.053615	0.026377	0.008345
36	63	0.45337	0.45337	0.323349	0.141088	0.051343	0.023434	0.007416
36	99	0.469602	0.469602	0.303263	0.135236	0.054578	0.026329	0.010991
36	99	0.434345	0.434345	0.317679	0.153199	0.058508	0.023755	0.012515
36	99	0.454319	0.454319	0.306019	0.145037	0.062854	0.025831	0.005939
37	0	0.443421	0.443421	0.345816	0.151712	0.046651	0.0124	0
37	0	0.44428	0.44428	0.345853	0.149996	0.047607	0.012264	0
37	1	0.44209	0.44209	0.347862	0.149974	0.048083	0.01199	0
37	1	0.441895	0.441895	0.346078	0.151702	0.048165	0.012159	0
37	1	0.44288	0.44288	0.34395	0.152815	0.047933	0.012422	0
37	3	0.436185	0.436185	0.345039	0.155088	0.050042	0.013646	0
37	3	0.441195	0.441195	0.345204	0.153359	0.048028	0.012213	0
37	3	0.513243	0.513243	0.297707	0.183055	0.005994	0	0
37	15	0.43105	0.43105	0.344503	0.156079	0.053255	0.015112	0
37	31	0.42502	0.42502	0.342995	0.158721	0.055695	0.017569	0
37	31	0.422769	0.422769	0.340986	0.159561	0.057904	0.01878	0
37	63	0.442614	0.442614	0.27935	0.211602	0.03987	0.025752	0.000813
37	63	0.407774	0.407774	0.337939	0.162488	0.062723	0.02164	0.007435
37	99	0.39972	0.39972	0.295629	0.162984	0.049714	0.042744	0.021363
37	99	0.400275	0.400275	0.331941	0.165135	0.066761	0.025826	0.010062
38	0	0.196189	0.196189	0.290492	0.253922	0.137358	0.071833	0.02807
38	0	0.208202	0.208202	0.31288	0.238693	0.139305	0.063178	0.025093
38	0	0.209874	0.209874	0.305286	0.24531	0.137131	0.063239	0.029118
38	1	0.00272616	0.002726	0.131441	0.210753	0.172042	0.163133	0.141833
38	1	0.204666	0.204666	0.312226	0.238456	0.14328	0.061331	0.028089
38	1	0.00409705	0.004097	0.182793	0.287002	0.231039	0.146439	0.080643
38	3	0.181912	0.181912	0.277667	0.242122	0.127045	0.070174	0.044971
38	3	0.195172	0.195172	0.28922	0.241901	0.13634	0.068602	0.03473
38	3	0.209801	0.209801	0.30602	0.230642	0.143072	0.069514	0.029004
38	6	0.19575	0.19575	0.306266	0.247253	0.138857	0.067111	0.033806
38	6	0.0033756	0.003376	0.195216	0.293614	0.229388	0.147428	0.074905
38	6	0.197961	0.197961	0.302463	0.244961	0.128304	0.067317	0.033761
38	15	0.199358	0.199358	0.301231	0.246399	0.142253	0.068161	0.030414
38	15	0.186358	0.186358	0.298663	0.229983	0.147898	0.073674	0.040816
38	15	0.00312976	0.00313	0.164776	0.242784	0.196353	0.151478	0.112224
38	31	0.197245	0.197245	0.297163	0.236177	0.135249	0.074766	0.034362
38	31	0.19472	0.19472	0.28635	0.245383	0.131281	0.074641	0.037339
38	63	0.183091	0.183091	0.291399	0.236342	0.141272	0.080787	0.034363
38	63	0.191096	0.191096	0.287457	0.239359	0.143154	0.072572	0.034722
38	63	0.18864	0.18864	0.288053	0.234589	0.141813	0.076893	0.03766
38	99	0.18296	0.18296	0.286679	0.233776	0.134441	0.077427	0.034986
38	99	0.184743	0.184743	0.28779	0.240924	0.140413	0.076263	0.036432
38	99	0.183185	0.183185	0.280081	0.242281	0.140937	0.069668	0.043199
39	0	0.416829	0.416829	0.358691	0.156715	0.052274	0.015492	0
39	0	0.42301	0.42301	0.342992	0.161272	0.056134	0.016592	0
39	1	0.406126	0.406126	0.359985	0.163271	0.056657	0.01396	0
39	3	0.433929	0.433929	0.352723	0.150357	0.050577	0.012413	0
39	3	0.410115	0.410115	0.34938	0.171951	0.051605	0.016949	0
39	6	0.411388	0.411388	0.356378	0.167671	0.047919	0.016644	0
39	6	0.432585	0.432585	0.341402	0.162331	0.048261	0.015421	0
39	15	0.42261	0.42261	0.328181	0.169249	0.065494	0.014466	0
39	15	0.39003	0.39003	0.350926	0.161406	0.06712	0.023306	0.007213
39	15	0.395228	0.395228	0.353258	0.161547	0.062287	0.021885	0.005796
39	31	0.400441	0.400441	0.339544	0.162355	0.066744	0.023712	0.007203
39	31	0.391743	0.391743	0.331596	0.169376	0.070996	0.030901	0.005388
39	63	0.37764	0.37764	0.325658	0.176518	0.074359	0.033368	0.012458
39	63	0.381868	0.381868	0.31968	0.1781	0.07062	0.036029	0.013702
39	63	0.37103	0.37103	0.330884	0.176335	0.075018	0.032388	0.014346
39	99	0.37104	0.37104	0.339203	0.1605	0.072652	0.038742	0.017863
39	99	0.358735	0.358735	0.320368	0.181456	0.088123	0.033881	0.017438
39	99	0.363273	0.363273	0.320704	0.1689	0.081287	0.038592	0.020179
40	0	0.229748	0.229748	0.322597	0.237118	0.131571	0.052139	0.019249
40	0	0.230517	0.230517	0.319511	0.23618	0.128357	0.059659	0.020401
40	0	0.227265	0.227265	0.321665	0.240872	0.130637	0.057405	0.017209
40	1	0.227759	0.227759	0.316776	0.246555	0.132246	0.049675	0.020395
40	1	0.226922	0.226922	0.328044	0.238571	0.126742	0.054036	0.019463
40	1	0.231691	0.231691	0.31989	0.241327	0.128061	0.053603	0.020218
40	3	0.230045	0.230045	0.313907	0.23106	0.134388	0.059257	0.022437
40	3	0.235816	0.235816	0.313805	0.241052	0.129633	0.056491	0.019259
40	3	0.226396	0.226396	0.328359	0.237327	0.129673	0.053754	0.018483
40	6	0.22392	0.22392	0.322166	0.24223	0.129841	0.053617	0.021111
40	6	0.230237	0.230237	0.316641	0.239039	0.132141	0.052325	0.023421
40	6	0.221701	0.221701	0.324717	0.245736	0.125775	0.05688	0.019853
40	15	0.226707	0.226707	0.312953	0.237321	0.12907	0.05742	0.026608
40	15	0.229324	0.229324	0.317071	0.238973	0.123363	0.053285	0.02455
40	15	0.223979	0.223979	0.311645	0.237561	0.129512	0.062645	0.022351
40	31	0.223853	0.223853	0.309083	0.239968	0.131988	0.056748	0.024504
40	31	0.216617	0.216617	0.322783	0.239618	0.11976	0.057287	0.030565
40	63	0.208306	0.208306	0.308471	0.230588	0.125322	0.060996	0.03446
40	63	0.205676	0.205676	0.30514	0.220021	0.124987	0.064807	0.032022
40	63	0.222587	0.222587	0.302325	0.219563	0.130908	0.061752	0.033772
40	99	0.21979	0.21979	0.285207	0.230264	0.119799	0.059086	0.034875
40	99	0.20551	0.20551	0.286302	0.220068	0.131429	0.061899	0.038923
40	99	0.212228	0.212228	0.290942	0.231067	0.121869	0.057061	0.035178
41	0	0.396934	0.396934	0.348535	0.172964	0.06292	0.018647	0
41	0	0.396618	0.396618	0.346677	0.173685	0.063792	0.019228	0
41	0	0.397572	0.397572	0.347605	0.173109	0.063178	0.018536	0
41	1	0.397252	0.397252	0.346075	0.174042	0.063152	0.019478	0
41	1	0.397639	0.397639	0.34517	0.175679	0.063215	0.018298	0
41	1	0.397053	0.397053	0.344985	0.175562	0.064184	0.018215	0
41	3	0.388445	0.388445	0.349205	0.176303	0.067879	0.018168	0
41	3	0.391637	0.391637	0.349636	0.174666	0.065473	0.018588	0
41	3	0.394509	0.394509	0.347905	0.175794	0.06252	0.019273	0
41	6	0.393248	0.393248	0.345429	0.170855	0.06464	0.019934	0.005895
41	6	0.393451	0.393451	0.348309	0.175162	0.063759	0.019319	0
41	6	0.398513	0.398513	0.343684	0.174009	0.064569	0.019225	0
41	15	0.383612	0.383612	0.343984	0.174246	0.068635	0.023273	0.006249
41	15	0.384167	0.384167	0.33948	0.174288	0.070828	0.022944	0.008293
41	15	0.383805	0.383805	0.344031	0.172671	0.06855	0.022933	0.00801
41	31	0.379032	0.379032	0.336198	0.178235	0.070557	0.026206	0.009772
41	31	0.377194	0.377194	0.335155	0.178024	0.072326	0.026517	0.010785
41	63	0.360383	0.360383	0.332101	0.178303	0.080179	0.034094	0.01494
41	63	0.362521	0.362521	0.330153	0.178345	0.079661	0.034608	0.014713
41	63	0.36978	0.36978	0.329566	0.178564	0.076199	0.03257	0.013321
41	99	0.368916	0.368916	0.329359	0.174404	0.079487	0.032683	0.015151
41	99	0.356373	0.356373	0.32658	0.182906	0.082695	0.0355	0.015946
41	99	0.352209	0.352209	0.322864	0.181405	0.079631	0.037242	0.018057
42	0	0.349159	0.349159	0.358794	0.191959	0.078571	0.01998	0.001536
42	0	0.36901	0.36901	0.337342	0.200388	0.078118	0.015141	0
42	0	0.362526	0.362526	0.328029	0.215403	0.070373	0.020055	0.003613
42	1	0.381908	0.381908	0.348009	0.179978	0.071469	0.018636	0
42	1	0.357832	0.357832	0.347083	0.188791	0.084109	0.019283	0.002903
42	1	0.334898	0.334898	0.355088	0.198578	0.079412	0.025773	0.006251
42	3	0.332147	0.332147	0.349095	0.211865	0.073524	0.033134	0.000235
42	3	0.355396	0.355396	0.339144	0.194442	0.076898	0.028635	0.005484
42	3	0.343337	0.343337	0.343655	0.201363	0.076665	0.0267	0.008281
42	6	0.353694	0.353694	0.336233	0.203444	0.07572	0.025416	0.005493
42	6	0.342821	0.342821	0.365335	0.182738	0.076075	0.026641	0.006391
42	6	0.351633	0.351633	0.349368	0.190581	0.078227	0.027012	0.00318
42	15	0.337568	0.337568	0.344504	0.200423	0.075954	0.033962	0.007589
42	15	0.335503	0.335503	0.346426	0.193949	0.080653	0.033075	0.010394
42	15	0.335568	0.335568	0.337117	0.196752	0.088781	0.030564	0.011218
42	31	0.329972	0.329972	0.347126	0.194557	0.082202	0.033044	0.013099
42	31	0.337881	0.337881	0.340522	0.187375	0.086573	0.032452	0.015197
42	63	0.316522	0.316522	0.326862	0.192942	0.089827	0.043238	0.019226
42	63	0.325967	0.325967	0.320024	0.192069	0.092775	0.037953	0.020868
42	63	0.316842	0.316842	0.329721	0.202545	0.091562	0.043845	0.015486
42	99	0.328456	0.328456	0.332207	0.189631	0.081696	0.037626	0.018968
42	99	0.311483	0.311483	0.327468	0.196616	0.089325	0.041041	0.023973
42	99	0.321228	0.321228	0.324683	0.190808	0.085584	0.042576	0.02133
43	0	0.650556	0.650556	0.209697	0.116123	0.023625	0	0
43	0	0.560219	0.560219	0.296505	0.124164	0.019113	0	0
43	3	0.564748	0.564748	0.340708	0.094545	0	0	0
43	6	0.566283	0.566283	0.349624	0.084093	0	0	0
43	6	0.592023	0.592023	0.302703	0.077969	0.027305	0	0
43	15	0.528185	0.528185	0.39008	0.074906	0.006828	0	0
43	15	0.549885	0.549885	0.332688	0.105676	0.011751	0	0
43	15	0.452496	0.452496	0.377281	0.154348	0.015874	0	0
43	31	0.513061	0.513061	0.349071	0.121867	0.016001	0	0
43	63	0.476209	0.476209	0.299546	0.159731	0.045073	0.019441	0
43	63	0.496253	0.496253	0.316194	0.126037	0.047603	0.013914	0
43	63	0.44373	0.44373	0.377894	0.127537	0.043455	0.007383	0
43	99	0.477413	0.477413	0.301592	0.143419	0.049649	0.024653	0.003274
43	99	0.450942	0.450942	0.299164	0.160415	0.057649	0.027404	0.004427
43	99	0.459614	0.459614	0.272217	0.150419	0.069135	0.044761	0.003855
44	0	0.289858	0.289858	0.360494	0.226048	0.107872	0.015728	0
44	0	0.350317	0.350317	0.32249	0.226664	0.075384	0.025145	0
44	1	0.321676	0.321676	0.344791	0.238311	0.07853	0.016691	0
44	1	0.357739	0.357739	0.315797	0.2272	0.081288	0.018059	-8.3e-05
44	1	0.34799	0.34799	0.321962	0.178422	0.142348	0.009278	0
44	3	0.350974	0.350974	0.269635	0.2044	0.15078	0.02439	-0.000178
44	3	0.314009	0.314009	0.310274	0.22599	0.133564	0.016192	-2.9e-05
44	6	0.282784	0.282784	0.348021	0.22496	0.126873	0.017361	0
44	6	0.309703	0.309703	0.307264	0.224926	0.154353	0.003754	0
44	6	0.303525	0.303525	0.326431	0.18559	0.165812	0.018545	9.7e-05
44	15	0.349628	0.349628	0.281621	0.185424	0.154378	0.027272	0.001677
44	15	0.289889	0.289889	0.301431	0.214745	0.145341	0.027823	0.020772
44	31	0.296108	0.296108	0.307112	0.212249	0.164192	0.020338	0
44	31	0.252096	0.252096	0.298634	0.243439	0.147747	0.031968	0.026116
44	63	0.305479	0.305479	0.315742	0.194598	0.154271	0.022306	0.007603
44	63	0.303148	0.303148	0.330487	0.194738	0.126906	0.029248	0.015473
44	99	0.281652	0.281652	0.297523	0.214951	0.147515	0.021726	0.036632
44	99	0.335218	0.335218	0.339523	0.201077	0.108922	0.01526	0
45	0	0.427433	0.427433	0.348131	0.157134	0.05252	0.014782	0
45	0	0.422716	0.422716	0.346379	0.158648	0.056166	0.016091	0
45	0	0.42326	0.42326	0.346326	0.158928	0.05549	0.015996	0
45	1	0.423789	0.423789	0.3439	0.161597	0.055873	0.014841	0
45	1	0.422958	0.422958	0.346831	0.160133	0.056037	0.014041	0
45	1	0.427067	0.427067	0.343817	0.158061	0.055736	0.01532	0
45	3	0.419447	0.419447	0.342859	0.164064	0.056986	0.016645	0
45	3	0.417818	0.417818	0.349281	0.161553	0.056545	0.014804	0
45	3	0.418481	0.418481	0.348505	0.161325	0.055257	0.016432	0
45	6	0.42125	0.42125	0.34575	0.160644	0.056657	0.015699	0
45	6	0.421604	0.421604	0.344349	0.16139	0.056024	0.016633	0
45	6	0.419509	0.419509	0.343981	0.162995	0.057299	0.016215	0
45	15	0.408894	0.408894	0.345328	0.165213	0.061078	0.019486	0
45	15	0.405437	0.405437	0.340366	0.16391	0.061885	0.021304	0.007099
45	15	0.412658	0.412658	0.341128	0.16529	0.061045	0.019878	0
45	31	0.399152	0.399152	0.339096	0.165175	0.06547	0.022961	0.008147
45	31	0.397326	0.397326	0.336292	0.16532	0.066546	0.024793	0.009722
45	63	0.382994	0.382994	0.327618	0.169703	0.073701	0.031744	0.01424
45	63	0.382492	0.382492	0.327905	0.169823	0.074113	0.032095	0.013572
45	99	0.369649	0.369649	0.325709	0.172833	0.080044	0.034728	0.017038
45	99	0.368581	0.368581	0.324801	0.170957	0.079083	0.038362	0.018216
46	0	0.181912	0.181912	0.322461	0.26995	0.137151	0.065738	0.020559
46	0	0.19599	0.19599	0.318876	0.254985	0.145524	0.069891	0.014735
46	0	0.173542	0.173542	0.313843	0.250857	0.153979	0.072587	0.02646
46	1	0.193321	0.193321	0.2816	0.276925	0.159437	0.068847	0.016746
46	1	0.197884	0.197884	0.32694	0.260157	0.145693	0.056903	0.012423
46	1	0.187022	0.187022	0.315215	0.286967	0.13753	0.054818	0.018447
46	3	0.188801	0.188801	0.279344	0.266479	0.17097	0.066276	0.027277
46	3	0.171943	0.171943	0.310933	0.273241	0.162674	0.070742	0.010466
46	3	0.178464	0.178464	0.312276	0.274697	0.15027	0.063158	0.019962
46	6	0.178722	0.178722	0.320664	0.25859	0.152485	0.058956	0.025619
46	6	0.209503	0.209503	0.30492	0.288925	0.122232	0.061085	0.013335
46	6	0.17804	0.17804	0.303602	0.279987	0.147075	0.065314	0.022049
46	15	0.177834	0.177834	0.310299	0.260831	0.152954	0.065756	0.025006
46	15	0.195456	0.195456	0.301857	0.247517	0.161205	0.070345	0.021907
46	15	0.175054	0.175054	0.3068	0.259877	0.158317	0.074757	0.016741
46	31	0.178069	0.178069	0.311561	0.261607	0.146244	0.068363	0.024993
46	31	0.192644	0.192644	0.296991	0.25541	0.151349	0.068138	0.028304
46	63	0.170887	0.170887	0.28875	0.255964	0.153474	0.072617	0.032613
46	63	0.169574	0.169574	0.297763	0.257516	0.155575	0.07298	0.032771
46	63	0.164975	0.164975	0.299246	0.268227	0.150826	0.076683	0.028141
46	99	0.177224	0.177224	0.298728	0.266243	0.141333	0.076271	0.027112
46	99	0.17215	0.17215	0.301419	0.258279	0.148783	0.074703	0.032113
46	99	0.170886	0.170886	0.299566	0.26108	0.144863	0.07059	0.02872
47	0	0.655469	0.655469	0.228513	0.094059	0.021959	0	0
47	0	0.68224	0.68224	0.203713	0.092417	0.021629	0	0
47	0	0.601771	0.601771	0.205777	0.178648	0.013804	0	0
47	1	0.595608	0.595608	0.214563	0.132679	0.054547	0.002603	0
47	1	0.577052	0.577052	0.215564	0.160882	0.041196	0.005306	0
47	1	0.524364	0.524364	0.145275	0.239277	0.091191	-0.000107	0
47	3	0.518378	0.518378	0.208125	0.225621	0.047892	-1.6e-05	0
47	3	0.580863	0.580863	0.214339	0.163584	0.035042	0.006172	0
47	6	0.52013	0.52013	0.219537	0.194804	0.054592	0.010936	0
47	15	0.522399	0.522399	0.19142	0.223632	0.05447	0.008078	0
47	31	0.565515	0.565515	0.215068	0.179643	0.037429	0.002345	0
47	31	0.610637	0.610637	0.222179	0.117408	0.044824	0.004952	0
48	0	0.278622	0.278622	0.351912	0.227302	0.099324	0.033496	0.009344
48	0	0.28175	0.28175	0.346702	0.222061	0.1058	0.035929	0.007758
48	0	0.285165	0.285165	0.355201	0.217722	0.099799	0.031342	0.010771
48	1	0.273686	0.273686	0.351587	0.22702	0.101611	0.035988	0.010108
48	1	0.28534	0.28534	0.347943	0.222624	0.10016	0.035804	0.008128
48	1	0.291375	0.291375	0.353981	0.214538	0.093894	0.038316	0.007897
48	3	0.264438	0.264438	0.350973	0.228194	0.102794	0.042369	0.011232
48	3	0.270077	0.270077	0.359112	0.221292	0.103284	0.03474	0.011496
48	3	0.272485	0.272485	0.340013	0.225734	0.112326	0.039458	0.009983
48	6	0.268685	0.268685	0.347397	0.222876	0.107012	0.04028	0.01375
48	6	0.272994	0.272994	0.353575	0.218276	0.105635	0.038585	0.010935
48	6	0.272111	0.272111	0.343236	0.22611	0.107485	0.03961	0.011448
48	15	0.266854	0.266854	0.336717	0.219664	0.113578	0.047395	0.015792
48	15	0.263134	0.263134	0.339381	0.218317	0.113733	0.049828	0.015606
48	15	0.26772	0.26772	0.346789	0.220028	0.105627	0.044046	0.01579
48	31	0.261722	0.261722	0.331887	0.22703	0.10764	0.045719	0.019219
48	31	0.251677	0.251677	0.336612	0.231117	0.1046	0.049247	0.019377
48	63	0.248951	0.248951	0.312439	0.222605	0.123285	0.056936	0.02341
48	63	0.251372	0.251372	0.328503	0.213856	0.113035	0.05673	0.026033
48	63	0.246451	0.246451	0.321899	0.225576	0.113267	0.053301	0.02643
48	99	0.243576	0.243576	0.325328	0.218087	0.116045	0.056248	0.028148
48	99	0.241164	0.241164	0.312481	0.223371	0.122371	0.057934	0.029151
48	99	0.245403	0.245403	0.308043	0.212133	0.116565	0.060472	0.032017
49	0	0.433923	0.433923	0.346046	0.165895	0.050832	0.003304	0
49	0	0.422421	0.422421	0.344468	0.168196	0.058751	0.006164	0
49	0	0.413848	0.413848	0.365901	0.160283	0.049043	0.010924	0
49	1	0.442952	0.442952	0.342664	0.161046	0.047395	0.005943	0
49	1	0.426795	0.426795	0.333293	0.18043	0.050844	0.008638	0
49	1	0.4053	0.4053	0.362312	0.167388	0.053318	0.011683	0
49	3	0.423625	0.423625	0.348114	0.158257	0.065991	0.004013	0
49	3	0.402743	0.402743	0.358659	0.166262	0.061264	0.011072	0
49	3	0.414851	0.414851	0.334288	0.174143	0.06408	0.012638	0
49	6	0.418558	0.418558	0.351629	0.157122	0.059563	0.013129	0
49	6	0.415695	0.415695	0.360713	0.165057	0.049245	0.00929	0
49	6	0.415548	0.415548	0.358117	0.15838	0.055821	0.012134	0
49	15	0.390494	0.390494	0.353717	0.180689	0.057924	0.017176	0
49	15	0.40272	0.40272	0.34174	0.167473	0.068569	0.019498	0
49	15	0.405088	0.405088	0.338661	0.17305	0.060763	0.020375	0.002062
49	31	0.392566	0.392566	0.345567	0.164294	0.068598	0.025055	0.003919
49	31	0.381521	0.381521	0.340973	0.187775	0.066092	0.020287	0.003351
49	63	0.363318	0.363318	0.344831	0.165442	0.087132	0.028611	0.010666
49	63	0.366777	0.366777	0.330757	0.18451	0.074681	0.030744	0.012531
49	63	0.356688	0.356688	0.333152	0.18143	0.082713	0.03363	0.012387
49	99	0.365564	0.365564	0.330223	0.176788	0.080544	0.032922	0.013958
49	99	0.347274	0.347274	0.33739	0.190528	0.076461	0.033554	0.014793
49	99	0.356284	0.356284	0.33182	0.179211	0.081981	0.03505	0.015654
50	0	0.451738	0.451738	0.341473	0.148285	0.046556	0.011948	0
50	0	0.449015	0.449015	0.346052	0.144834	0.047498	0.0126	0
50	0	0.449123	0.449123	0.340243	0.151073	0.046902	0.012659	0
50	1	0.453417	0.453417	0.344225	0.142502	0.047865	0.01199	0
50	1	0.448569	0.448569	0.344603	0.14734	0.047373	0.012115	0
50	1	0.44808	0.44808	0.34287	0.15032	0.045975	0.012755	0
50	3	0.442971	0.442971	0.337732	0.153773	0.051369	0.014155	0
50	3	0.449788	0.449788	0.340989	0.147167	0.04962	0.012436	0
50	3	0.450146	0.450146	0.339002	0.148721	0.048484	0.013646	0
50	6	0.44717	0.44717	0.340959	0.15024	0.048519	0.013111	0
50	6	0.451563	0.451563	0.337362	0.148345	0.049336	0.013394	0
50	6	0.450789	0.450789	0.339143	0.148183	0.047664	0.014222	0
50	15	0.436933	0.436933	0.337277	0.155413	0.054337	0.016041	0
50	15	0.436553	0.436553	0.336669	0.155295	0.053919	0.017563	0
50	15	0.438981	0.438981	0.342286	0.149983	0.052895	0.015856	0
50	31	0.434388	0.434388	0.338693	0.152406	0.055592	0.018921	0
50	31	0.429449	0.429449	0.338179	0.155642	0.056866	0.019864	0
50	63	0.414959	0.414959	0.326397	0.156223	0.064774	0.025693	0.011954
50	63	0.41449	0.41449	0.322701	0.159668	0.065105	0.025569	0.012466
50	63	0.415021	0.415021	0.323315	0.160675	0.06381	0.025913	0.011267
50	99	0.420098	0.420098	0.324615	0.154844	0.061877	0.025982	0.012583
50	99	0.408302	0.408302	0.323959	0.159011	0.068055	0.028263	0.012411
50	99	0.40829	0.40829	0.322519	0.159233	0.06639	0.029734	0.013833
51	0	0.332757	0.332757	0.348654	0.20354	0.082545	0.025711	0.006794
51	0	0.343359	0.343359	0.341543	0.199354	0.08125	0.027989	0.006505
51	0	0.324055	0.324055	0.354481	0.205762	0.082772	0.025503	0.007427
51	1	0.32943	0.32943	0.353196	0.201101	0.083513	0.025553	0.007207
51	1	0.330307	0.330307	0.351489	0.207828	0.079585	0.024637	0.006154
51	1	0.324676	0.324676	0.356517	0.20557	0.085375	0.02395	0.003911
51	3	0.314951	0.314951	0.344205	0.211332	0.089657	0.03206	0.007795
51	3	0.334913	0.334913	0.360051	0.203816	0.087165	0.014055	0
51	3	0.32328	0.32328	0.354525	0.202498	0.085462	0.030412	0.003822
51	6	0.29947	0.29947	0.366484	0.206441	0.096956	0.028952	0.001697
51	6	0.33268	0.33268	0.34523	0.203987	0.081906	0.027622	0.008576
51	6	0.31678	0.31678	0.341242	0.208613	0.091326	0.035812	0.006227
51	15	0.303395	0.303395	0.35709	0.200241	0.086937	0.039001	0.013336
51	15	0.283318	0.283318	0.369105	0.221003	0.093623	0.027734	0.005216
51	15	0.316579	0.316579	0.344743	0.213629	0.086191	0.029617	0.009241
51	31	0.299958	0.299958	0.334721	0.210422	0.095418	0.035766	0.017855
51	31	0.29174	0.29174	0.332705	0.21993	0.091751	0.043375	0.017389
51	63	0.297021	0.297021	0.320938	0.193489	0.106353	0.048555	0.028201
51	63	0.266518	0.266518	0.318701	0.210838	0.105668	0.058355	0.028003
51	63	0.288026	0.288026	0.314846	0.199471	0.108233	0.057233	0.019692
51	99	0.274205	0.274205	0.303001	0.204323	0.116128	0.058167	0.031998
51	99	0.272776	0.272776	0.300776	0.202427	0.117311	0.063363	0.031223
51	99	0.259449	0.259449	0.299488	0.205275	0.110111	0.061168	0.037276
52	0	0.222604	0.222604	0.322726	0.241521	0.163301	0.049847	0
52	0	0.261806	0.261806	0.306875	0.238145	0.128909	0.040216	0.022206
52	0	0.269867	0.269867	0.318705	0.25726	0.109225	0.040224	0.004719
52	1	0.267254	0.267254	0.331541	0.229616	0.129464	0.033514	0.008611
52	1	0.233548	0.233548	0.345905	0.225725	0.131244	0.046165	0.017412
52	1	0.270807	0.270807	0.316493	0.216026	0.135588	0.047312	0.013775
52	3	0.238728	0.238728	0.414033	0.197501	0.134992	0.014746	0
52	3	0.240311	0.240311	0.366651	0.232079	0.114792	0.030052	0.016115
52	3	0.256106	0.256106	0.329433	0.237927	0.12284	0.039795	0.013899
52	6	0.251429	0.251429	0.330372	0.252987	0.117235	0.040539	0.007439
52	6	0.245533	0.245533	0.337235	0.234797	0.12195	0.048793	0.011692
52	6	0.221765	0.221765	0.307073	0.241957	0.152457	0.06517	0.011577
52	15	0.246185	0.246185	0.316872	0.228595	0.121434	0.055822	0.025649
52	15	0.229278	0.229278	0.317457	0.22736	0.138563	0.060311	0.020345
52	31	0.237476	0.237476	0.291321	0.220842	0.134514	0.052146	0.034249
52	31	0.202084	0.202084	0.3098	0.22817	0.137843	0.059792	0.029691
52	63	0.0010751	0.001075	0.194871	0.27223	0.209837	0.142671	0.076557
52	63	0.210021	0.210021	0.288229	0.20824	0.135097	0.065396	0.046398
52	63	0.20663	0.20663	0.277904	0.219942	0.125841	0.075313	0.043725
52	99	0.195975	0.195975	0.269722	0.221272	0.127407	0.074639	0.045559
52	99	0.195821	0.195821	0.269941	0.198584	0.131792	0.080951	0.049346
52	99	0.205192	0.205192	0.291245	0.196903	0.119412	0.073381	0.049245
53	0	0.518474	0.518474	0.326876	0.116636	0.031794	0.00622	0
53	0	0.517742	0.517742	0.329375	0.117326	0.028995	0.006562	0
53	0	0.518221	0.518221	0.324725	0.119406	0.030893	0.006755	0
53	1	0.520933	0.520933	0.325428	0.117153	0.030063	0.006423	0
53	1	0.517701	0.517701	0.327532	0.118572	0.030175	0.00602	0
53	1	0.517315	0.517315	0.327112	0.118909	0.03013	0.006535	0
53	3	0.508113	0.508113	0.326767	0.124198	0.034129	0.006793	0
53	3	0.511923	0.511923	0.325954	0.12401	0.032015	0.006098	0
53	3	0.508102	0.508102	0.333511	0.119596	0.03182	0.006971	0
53	6	0.501186	0.501186	0.33384	0.125059	0.033038	0.006876	0
53	6	0.502103	0.502103	0.333492	0.124141	0.032995	0.007269	0
53	6	0.503818	0.503818	0.331047	0.124395	0.032599	0.008141	0
53	15	0.488792	0.488792	0.33694	0.128874	0.036497	0.008898	0
53	15	0.486286	0.486286	0.332633	0.132656	0.038611	0.009814	0
53	15	0.487909	0.487909	0.331534	0.133826	0.037847	0.008884	0
53	31	0.48216	0.48216	0.330714	0.135152	0.041021	0.010953	0
53	31	0.477077	0.477077	0.331112	0.13793	0.043406	0.010476	0
53	63	0.46403	0.46403	0.32865	0.144453	0.047956	0.01491	0
53	63	0.46015	0.46015	0.329679	0.146461	0.048127	0.015583	0
53	63	0.463779	0.463779	0.329733	0.144943	0.0474	0.014146	0
53	99	0.464086	0.464086	0.327302	0.144512	0.048782	0.015318	0
53	99	0.458421	0.458421	0.329334	0.146211	0.05057	0.015464	0
53	99	0.449899	0.449899	0.330433	0.148636	0.053222	0.01781	0
54	0	0.349024	0.349024	0.356329	0.188124	0.076155	0.024721	0.005646
54	0	0.353406	0.353406	0.35024	0.193354	0.075565	0.022961	0.004474
54	0	0.362163	0.362163	0.344021	0.188732	0.074884	0.024189	0.006012
54	1	0.365014	0.365014	0.34417	0.190316	0.072623	0.022389	0.005487
54	1	0.357956	0.357956	0.344059	0.192838	0.076117	0.023174	0.005856
54	1	0.315248	0.315248	0.341516	0.211405	0.098498	0.033741	-0.000407
54	3	0.359375	0.359375	0.339568	0.193981	0.074204	0.024397	0.008476
54	3	0.387528	0.387528	0.283932	0.203748	0.104137	0.021843	-0.001188
54	3	0.353453	0.353453	0.343909	0.192646	0.077611	0.026293	0.006088
54	6	0.354919	0.354919	0.34367	0.191298	0.078371	0.024129	0.007612
54	6	0.354211	0.354211	0.338871	0.192826	0.07866	0.026745	0.008688
54	6	0.346885	0.346885	0.350132	0.191006	0.079692	0.024496	0.00779
54	15	0.343737	0.343737	0.34029	0.19521	0.080466	0.029291	0.011006
54	15	0.350466	0.350466	0.334274	0.187103	0.083684	0.031336	0.013137
54	15	0.342962	0.342962	0.344105	0.196629	0.076891	0.029102	0.010311
54	31	0.347169	0.347169	0.33217	0.196708	0.077804	0.032008	0.014141
54	31	0.341937	0.341937	0.33044	0.199237	0.078851	0.034645	0.01489
54	63	0.317559	0.317559	0.326974	0.190769	0.089058	0.042863	0.020743
54	63	0.329444	0.329444	0.3124	0.189087	0.090067	0.044895	0.021133
54	63	0.324422	0.324422	0.325455	0.189355	0.088391	0.042256	0.021032
54	99	0.321006	0.321006	0.324917	0.192984	0.088707	0.041202	0.020489
54	99	0.311711	0.311711	0.327302	0.189897	0.092005	0.045041	0.022435
54	99	0.3247	0.3247	0.314227	0.185571	0.092524	0.043994	0.024647
55	0	0.284498	0.284498	0.336821	0.228149	0.103726	0.038347	0.00846
55	0	0.280432	0.280432	0.339253	0.229116	0.104089	0.033555	0.013555
55	0	0.285841	0.285841	0.3308	0.224545	0.111377	0.036432	0.011005
55	1	0.287856	0.287856	0.344569	0.221327	0.10724	0.033213	0.005794
55	1	0.295493	0.295493	0.327583	0.229751	0.104739	0.031759	0.010676
55	1	0.300281	0.300281	0.335595	0.21124	0.110495	0.036676	0.005713
55	3	0.285942	0.285942	0.333291	0.220314	0.115011	0.036996	0.008446
55	3	0.27478	0.27478	0.33129	0.237995	0.113086	0.032618	0.010231
55	3	0.276199	0.276199	0.329232	0.233599	0.117882	0.037263	0.005825
55	6	0.290761	0.290761	0.345691	0.205491	0.106949	0.040612	0.010497
55	6	0.287461	0.287461	0.316736	0.235633	0.097651	0.046688	0.015831
55	6	0.277889	0.277889	0.329317	0.214826	0.123338	0.040123	0.014507
55	15	0.276817	0.276817	0.317938	0.242182	0.099379	0.048536	0.015148
55	15	0.261299	0.261299	0.336767	0.217164	0.109904	0.046093	0.019864
55	15	0.294425	0.294425	0.326445	0.201712	0.11504	0.041847	0.017173
55	31	0.279534	0.279534	0.329826	0.207981	0.11356	0.045645	0.019304
55	31	0.280368	0.280368	0.337721	0.22418	0.105169	0.037873	0.014689
55	63	0.262585	0.262585	0.319343	0.214999	0.119434	0.046765	0.023401
55	63	0.240285	0.240285	0.321886	0.211783	0.116801	0.059734	0.024474
55	63	0.273686	0.273686	0.313178	0.208255	0.111313	0.053547	0.029353
55	99	0.277571	0.277571	0.307324	0.218683	0.115097	0.042957	0.02405
55	99	0.260267	0.260267	0.29891	0.219491	0.120617	0.057945	0.029598
55	99	0.253196	0.253196	0.322527	0.209373	0.110989	0.062095	0.030181
56	0	0.212546	0.212546	0.321121	0.250794	0.13794	0.05489	0.016903
56	0	0.213823	0.213823	0.301583	0.260617	0.134546	0.060155	0.022779
56	0	0.214413	0.214413	0.314794	0.250261	0.137346	0.057223	0.01891
56	1	0.196195	0.196195	0.335757	0.240218	0.142193	0.05771	0.023192
56	1	0.198939	0.198939	0.325645	0.258686	0.129893	0.057241	0.023744
56	1	0.206667	0.206667	0.32452	0.247643	0.133333	0.059314	0.021183
56	3	1	1	0	0	0	0	0
56	3	0.218585	0.218585	0.3152	0.243568	0.141771	0.054511	0.021929
56	3	0.216308	0.216308	0.31619	0.246761	0.134063	0.062425	0.018336
56	6	1	1	0	0	0	0	0
56	6	0.21158	0.21158	0.333332	0.243979	0.138683	0.065521	0.006904
56	6	1	1	0	0	0	0	0
56	15	0.212121	0.212121	0.306414	0.236675	0.148742	0.057608	0.027627
56	15	0.191098	0.191098	0.294499	0.246404	0.138397	0.079332	0.032859
56	31	0.196815	0.196815	0.293769	0.247374	0.145611	0.071434	0.031448
56	31	0.1831	0.1831	0.307952	0.245832	0.15452	0.069582	0.02782
56	63	0.185587	0.185587	0.305831	0.221935	0.138802	0.078807	0.036711
56	63	0.174389	0.174389	0.288802	0.24589	0.13637	0.074464	0.040382
56	63	0.180059	0.180059	0.28851	0.240691	0.148134	0.077343	0.038348
56	99	0.175929	0.175929	0.283599	0.2536	0.147062	0.074725	0.038758
56	99	0.178829	0.178829	0.285106	0.235541	0.148702	0.073396	0.042374
56	99	0.166652	0.166652	0.276883	0.228898	0.146642	0.08185	0.04453
57	0	0.261806	0.261806	0.306875	0.238145	0.128909	0.040216	0.022206
57	6	0.251429	0.251429	0.330372	0.252987	0.117235	0.040539	0.007439
57	15	0.246185	0.246185	0.316872	0.228595	0.121434	0.055822	0.025649
57	31	0.00245986	0.00246	0.220868	0.288222	0.231527	0.126248	0.063267
57	63	0.210021	0.210021	0.288229	0.20824	0.135097	0.065396	0.046398
57	63	0.20663	0.20663	0.277904	0.219942	0.125841	0.075313	0.043725
57	99	0.195975	0.195975	0.269722	0.221272	0.127407	0.074639	0.045559
57	99	0.195821	0.195821	0.269941	0.198584	0.131792	0.080951	0.049346
57	99	0.00160869	0.001609	0.176492	0.275724	0.21407	0.128629	0.081232
58	3	0.428813	0.428813	0.357147	0.176762	0.023361	0.013918	0
58	3	0.420572	0.420572	0.351803	0.175706	0.049701	0.002219	0
58	3	0.415879	0.415879	0.361549	0.183436	0.032296	0.00684	0
58	6	0.379704	0.379704	0.395379	0.162442	0.059359	0.003115	0
58	6	0.400673	0.400673	0.357245	0.174373	0.051628	0.016082	0
58	6	0.407131	0.407131	0.350014	0.195492	0.041431	0.005932	0
58	15	0.362955	0.362955	0.356051	0.206966	0.063313	0.010716	0
58	15	0.360024	0.360024	0.355956	0.182291	0.079286	0.019863	0.002581
58	15	0.381047	0.381047	0.345022	0.180281	0.075738	0.017912	0
58	31	0.335492	0.335492	0.336169	0.222393	0.070241	0.032339	0.003367
58	31	0.304997	0.304997	0.366073	0.213495	0.080075	0.026912	0.008447
58	63	0.287232	0.287232	0.319726	0.231814	0.093795	0.045695	0.016153
58	63	0.317501	0.317501	0.325066	0.215511	0.099831	0.028819	0.013271
58	63	0.312666	0.312666	0.353263	0.194775	0.087949	0.039792	0.011555
58	99	0.277448	0.277448	0.337277	0.218821	0.103058	0.047328	0.016068
58	99	0.217791	0.217791	0.331246	0.248538	0.126928	0.047355	0.024025
58	99	0.215677	0.215677	0.335551	0.239364	0.127163	0.065886	0.016358
59	0	0.337465	0.337465	0.351402	0.198333	0.078843	0.02712	0.006837
59	0	0.337867	0.337867	0.345821	0.202007	0.081584	0.027638	0.005082
59	0	0.33319	0.33319	0.345569	0.197599	0.088002	0.02763	0.008011
59	1	0.322121	0.322121	0.35435	0.199308	0.092276	0.026265	0.00568
59	1	0.334089	0.334089	0.343362	0.209216	0.090086	0.019043	0.004204
59	1	0.312277	0.312277	0.361813	0.212562	0.084083	0.019676	0.009588
59	3	0.331017	0.331017	0.353456	0.197919	0.081032	0.028313	0.008263
59	3	0.327881	0.327881	0.358445	0.216298	0.07985	0.017526	0
59	3	0.318945	0.318945	0.358582	0.201111	0.089828	0.025458	0.006076
59	6	0.311146	0.311146	0.370629	0.200513	0.084075	0.028685	0.004951
59	6	0.335024	0.335024	0.340831	0.203605	0.085752	0.030775	0.004013
59	6	0.336423	0.336423	0.350114	0.19542	0.086895	0.023699	0.00745
59	15	0.317251	0.317251	0.339431	0.206821	0.095635	0.032251	0.008611
59	15	0.336604	0.336604	0.345407	0.1964	0.082333	0.024642	0.014614
59	15	0.305204	0.305204	0.374765	0.206213	0.081128	0.030447	0.002244
59	31	0.323103	0.323103	0.343233	0.197477	0.088833	0.038594	0.008761
59	31	0.303166	0.303166	0.339387	0.206194	0.095214	0.04531	0.010729
59	63	0.29778	0.29778	0.348336	0.205916	0.095874	0.039899	0.012195
59	63	0.301474	0.301474	0.345531	0.200633	0.098182	0.038553	0.015627
59	63	0.30782	0.30782	0.335336	0.20945	0.093445	0.037701	0.016247
59	99	0.311089	0.311089	0.353254	0.18728	0.098447	0.033645	0.016284
59	99	0.300958	0.300958	0.333426	0.201585	0.096908	0.041495	0.016716
59	99	0.293374	0.293374	0.333377	0.206071	0.096957	0.041319	0.020553
60	1	0.299106	0.299106	0.301857	0.237339	0.1224	0.039298	0
60	3	0.116359	0.116359	0.15573	0.182307	0.3324	0.079325	0.020037
60	6	0.0611717	0.061172	0.233847	0.291524	0.211905	0.118493	0.05444
60	99	1	1	0	0	0	0	0
61	0	0.315094	0.315094	0.346243	0.208643	0.090141	0.032118	0.00776
61	0	0.31348	0.31348	0.349601	0.20853	0.089241	0.030492	0.008656
61	1	0.314721	0.314721	0.347138	0.207511	0.090061	0.031703	0.008867
61	1	0.308822	0.308822	0.347756	0.211	0.089635	0.032573	0.010216
61	3	0.31194	0.31194	0.339306	0.211213	0.092747	0.034012	0.010782
61	3	0.311734	0.311734	0.344789	0.20968	0.091784	0.032424	0.009591
61	6	0.311844	0.311844	0.348214	0.207767	0.091445	0.030833	0.009896
61	15	0.306037	0.306037	0.339459	0.211466	0.095346	0.035766	0.011927
61	63	0.285058	0.285058	0.320118	0.208618	0.103812	0.049049	0.022031
61	63	0.285409	0.285409	0.325315	0.211321	0.101814	0.045088	0.021346
61	99	0.278376	0.278376	0.31803	0.209232	0.108457	0.049897	0.024033
61	99	0.280511	0.280511	0.319035	0.205622	0.104988	0.050468	0.025454
62	0	0.422293	0.422293	0.346737	0.161409	0.05518	0.014381	0
62	0	0.417419	0.417419	0.344666	0.16782	0.054763	0.015332	0
62	0	0.414576	0.414576	0.35161	0.163309	0.055064	0.015441	0
62	1	0.417827	0.417827	0.346374	0.162339	0.057869	0.015591	0
62	1	0.416742	0.416742	0.344885	0.167874	0.054774	0.015725	0
62	3	0.406626	0.406626	0.352358	0.166958	0.056808	0.017251	0
62	6	0.403948	0.403948	0.350051	0.169161	0.059293	0.017547	0
62	6	0.402371	0.402371	0.35073	0.171889	0.057785	0.017226	0
62	6	0.403039	0.403039	0.352656	0.166442	0.060453	0.01741	0
62	15	0.395123	0.395123	0.342224	0.171156	0.065015	0.020716	0.005766
62	15	0.388685	0.388685	0.342548	0.17386	0.066181	0.022358	0.006368
62	15	0.391759	0.391759	0.340654	0.17482	0.06414	0.023032	0.005595
62	31	0.383537	0.383537	0.342783	0.173041	0.069191	0.023318	0.00813
62	63	0.364885	0.364885	0.334166	0.179948	0.078131	0.031234	0.011636
62	63	0.368982	0.368982	0.330711	0.177827	0.078781	0.031421	0.012279
62	99	0.367147	0.367147	0.330994	0.177599	0.077983	0.031528	0.014748
62	99	0.361424	0.361424	0.327676	0.179349	0.081416	0.034924	0.015212
62	99	0.358944	0.358944	0.330538	0.178629	0.0797	0.035193	0.016997
63	0	0.233715	0.233715	0.357382	0.223747	0.130893	0.043073	0.011189
63	0	0.255098	0.255098	0.343621	0.225201	0.120544	0.045849	0.009687
63	0	0.243181	0.243181	0.342601	0.241242	0.116896	0.043214	0.012866
63	1	0.2461	0.2461	0.37459	0.232001	0.110337	0.030839	0.006133
63	3	0.243689	0.243689	0.35907	0.2482	0.107703	0.038268	0.003071
63	3	0.276099	0.276099	0.346283	0.224425	0.107566	0.034733	0.010895
63	6	0.26974	0.26974	0.323833	0.247187	0.107293	0.042431	0.009517
63	6	0.248972	0.248972	0.359194	0.24417	0.103395	0.031426	0.012843
63	15	0.254569	0.254569	0.340934	0.236869	0.10786	0.043591	0.016178
63	15	0.259137	0.259137	0.347086	0.228697	0.103946	0.046554	0.014581
63	31	0.249764	0.249764	0.341818	0.21678	0.120318	0.04883	0.017984
63	63	0.224617	0.224617	0.328142	0.232923	0.119498	0.058974	0.026503
63	63	0.233366	0.233366	0.312274	0.229825	0.122029	0.060508	0.027493
63	63	0.24302	0.24302	0.323261	0.235431	0.112439	0.053195	0.027364
63	99	0.243396	0.243396	0.336706	0.238996	0.095992	0.050729	0.027316
63	99	0.234217	0.234217	0.310635	0.226343	0.115564	0.069436	0.032412
63	99	0.251632	0.251632	0.302351	0.225106	0.117677	0.051501	0.021339
64	0	0.422474	0.422474	0.349723	0.159305	0.053667	0.014831	0
64	0	0.421921	0.421921	0.350224	0.160938	0.052897	0.01402	0
64	0	0.422538	0.422538	0.348316	0.1624	0.052552	0.014194	0
64	1	0.424296	0.424296	0.347472	0.161104	0.053124	0.014004	0
64	1	0.642305	0.642305	0.266874	0.087357	0.003465	0	0
64	1	0.422276	0.422276	0.3439	0.16395	0.055575	0.014299	0
64	3	0.413066	0.413066	0.346836	0.165111	0.05737	0.017617	0
64	3	0.422437	0.422437	0.348951	0.158329	0.055115	0.015167	0
64	3	0.421515	0.421515	0.345849	0.162578	0.054826	0.015232	0
64	6	0.416726	0.416726	0.349267	0.162424	0.055525	0.016058	0
64	6	0.418759	0.418759	0.348669	0.161758	0.055218	0.015596	0
64	6	0.419128	0.419128	0.348392	0.161172	0.055457	0.015851	0
64	15	0.407779	0.407779	0.339969	0.163686	0.061348	0.020518	0.0067
64	15	0.400886	0.400886	0.342679	0.164306	0.062663	0.021836	0.00763
64	15	0.410795	0.410795	0.341304	0.166849	0.060522	0.020531	0
64	31	0.39442	0.39442	0.336236	0.167985	0.066946	0.024647	0.009766
64	31	0.394497	0.394497	0.335428	0.168382	0.067411	0.024497	0.009785
64	63	0.3749	0.3749	0.323446	0.173036	0.078673	0.034397	0.015547
64	63	0.373774	0.373774	0.32434	0.171902	0.078773	0.035609	0.015602
64	63	0.371903	0.371903	0.324992	0.174622	0.078666	0.034718	0.015099
64	99	0.365738	0.365738	0.319656	0.170612	0.078055	0.038944	0.019286
64	99	0.360996	0.360996	0.320748	0.177534	0.083324	0.039643	0.017756
64	99	0.357788	0.357788	0.313121	0.172142	0.08353	0.042422	0.02223
65	0	0.541232	0.541232	0.313358	0.113077	0.027975	0.004359	0
65	0	0.526807	0.526807	0.321281	0.115533	0.030009	0.00637	0
65	0	0.527056	0.527056	0.321795	0.114758	0.030083	0.006308	0
65	1	0.52372	0.52372	0.323736	0.115592	0.030624	0.006329	0
65	1	0.527273	0.527273	0.321737	0.114427	0.030388	0.006174	0
65	1	0.527278	0.527278	0.319783	0.116231	0.030323	0.006385	0
65	3	0.51949	0.51949	0.325034	0.116952	0.031669	0.006855	0
65	3	0.527584	0.527584	0.320197	0.11537	0.030276	0.006573	0
65	3	0.526502	0.526502	0.32151	0.116185	0.029489	0.006314	0
65	6	0.526918	0.526918	0.319725	0.116891	0.030212	0.006253	0
65	6	0.526195	0.526195	0.320304	0.116109	0.030854	0.006538	0
65	6	0.528496	0.528496	0.318865	0.115083	0.030836	0.006721	0
65	15	0.518739	0.518739	0.319355	0.120703	0.033326	0.007878	0
65	15	0.514914	0.514914	0.320115	0.12163	0.034948	0.008392	0
65	15	0.518409	0.518409	0.321003	0.118666	0.033735	0.008187	0
65	31	0.509491	0.509491	0.320918	0.123606	0.036629	0.009356	0
65	31	0.509193	0.509193	0.320531	0.123471	0.037129	0.009676	0
65	63	0.492342	0.492342	0.320336	0.131607	0.042788	0.012928	0
65	63	0.490529	0.490529	0.320775	0.131726	0.043724	0.013245	0
65	63	0.493177	0.493177	0.321144	0.131586	0.041935	0.012159	0
65	99	0.494294	0.494294	0.317148	0.131295	0.043749	0.013514	0
65	99	0.488248	0.488248	0.319251	0.134393	0.044378	0.01373	0
65	99	0.484848	0.484848	0.318179	0.134704	0.046758	0.015511	0
66	0	0.450325	0.450325	0.33129	0.149471	0.05038	0.018534	0
66	0	0.482637	0.482637	0.303796	0.158089	0.055058	0.000419	0
66	0	0.430795	0.430795	0.33665	0.162224	0.059971	0.01036	0
66	1	0.422608	0.422608	0.327504	0.167877	0.070317	0.011695	0
66	1	0.436458	0.436458	0.328726	0.173275	0.05585	0.00569	0
66	1	0.447714	0.447714	0.34719	0.155132	0.043832	0.006132	0
66	3	0.405057	0.405057	0.3317	0.190442	0.060915	0.011886	0
66	3	0.435927	0.435927	0.341309	0.164872	0.052997	0.004895	0
66	3	0.437248	0.437248	0.322209	0.177346	0.054649	0.008548	0
66	6	0.425135	0.425135	0.340087	0.162484	0.063704	0.008591	0
66	6	0.418435	0.418435	0.329754	0.164205	0.069197	0.01841	0
66	6	0.999916	0.999916	8.4e-05	0	0	0	0
66	15	0.407627	0.407627	0.340302	0.169498	0.059693	0.02288	0
66	15	0.375072	0.375072	0.363141	0.169263	0.073834	0.018689	0
66	15	0.426753	0.426753	0.332309	0.163006	0.065382	0.01255	0
66	31	0.40582	0.40582	0.336627	0.145604	0.081335	0.021823	0.008791
66	31	0.393297	0.393297	0.337597	0.175809	0.069271	0.020529	0.003496
66	63	0.387689	0.387689	0.321686	0.182702	0.070034	0.030553	0.007337
66	63	0.387058	0.387058	0.333736	0.165569	0.075083	0.0296	0.008954
66	63	0.408051	0.408051	0.312411	0.172761	0.075078	0.027911	0.003789
66	99	0.390021	0.390021	0.325211	0.177225	0.069158	0.028749	0.009637
66	99	0.390874	0.390874	0.311991	0.183284	0.084374	0.029477	0
66	99	0.398926	0.398926	0.300469	0.177077	0.076442	0.03225	0.014836
67	0	0.288228	0.288228	0.34199	0.229124	0.095724	0.037598	0.007336
67	0	0.275193	0.275193	0.3534	0.214805	0.104668	0.038464	0.01347
67	0	0.296643	0.296643	0.322523	0.22488	0.107118	0.043321	0.005515
67	1	0.280956	0.280956	0.336301	0.236082	0.10586	0.032664	0.008136
67	1	0.272962	0.272962	0.347399	0.23184	0.095585	0.039317	0.012896
67	1	0.284241	0.284241	0.3425	0.21435	0.111559	0.041864	0.005486
67	3	0.307216	0.307216	0.327393	0.213461	0.100108	0.041417	0.010405
67	3	0.298815	0.298815	0.332039	0.223112	0.097503	0.03489	0.013642
67	3	0.292383	0.292383	0.33634	0.21876	0.102962	0.037357	0.012198
67	6	0.295937	0.295937	0.324384	0.223602	0.106829	0.036874	0.012374
67	6	0.302707	0.302707	0.335253	0.210535	0.101902	0.040372	0.00923
67	6	0.286711	0.286711	0.337587	0.216821	0.110413	0.035305	0.013163
67	15	0.295736	0.295736	0.343578	0.200264	0.11061	0.03753	0.012281
67	15	0.285997	0.285997	0.331143	0.215074	0.115407	0.037581	0.014798
67	15	0.286518	0.286518	0.3378	0.215128	0.104709	0.04357	0.012275
67	31	0.272628	0.272628	0.330788	0.238763	0.11218	0.039233	0.006408
67	31	0.283194	0.283194	0.328585	0.225199	0.105888	0.030861	0.020119
67	63	0.258745	0.258745	0.331648	0.2261	0.114897	0.044698	0.02069
67	63	0.289821	0.289821	0.325456	0.217017	0.098913	0.046455	0.017162
67	63	0.261521	0.261521	0.346405	0.214357	0.112925	0.04309	0.017401
67	99	0.285896	0.285896	0.300265	0.239433	0.102395	0.048513	0.017323
67	99	0.261939	0.261939	0.346601	0.222229	0.093773	0.048547	0.018597
67	99	0.267836	0.267836	0.314434	0.220964	0.117009	0.049893	0.018665
68	0	0.228023	0.228023	0.32094	0.240584	0.131759	0.053954	0.01911
68	0	0.227447	0.227447	0.319946	0.241889	0.131336	0.054109	0.019321
68	1	0.227994	0.227994	0.317854	0.242713	0.13201	0.054184	0.01922
68	1	0.22683	0.22683	0.318497	0.240381	0.133029	0.055285	0.020204
68	3	0.226109	0.226109	0.314188	0.243294	0.128214	0.057795	0.022139
68	3	0.228373	0.228373	0.318892	0.241195	0.127842	0.05586	0.02133
68	3	0.22731	0.22731	0.315147	0.244046	0.130823	0.05571	0.020438
68	6	0.226633	0.226633	0.318622	0.240957	0.129553	0.056016	0.021161
68	6	0.227507	0.227507	0.321201	0.237926	0.12816	0.056374	0.021519
68	6	0.227465	0.227465	0.318995	0.239929	0.128943	0.056013	0.021488
68	15	0.224804	0.224804	0.316206	0.237167	0.130263	0.057203	0.023932
68	15	0.218354	0.218354	0.310345	0.242701	0.131727	0.05927	0.025144
68	15	0.225271	0.225271	0.311824	0.239974	0.128538	0.058839	0.024989
68	31	0.224289	0.224289	0.311387	0.238456	0.128019	0.058261	0.026739
68	31	0.220516	0.220516	0.309148	0.237011	0.128588	0.061124	0.029606
68	63	0.208862	0.208862	0.295341	0.225278	0.126064	0.064559	0.034626
68	63	0.211035	0.211035	0.297701	0.228477	0.128336	0.065113	0.034443
68	63	0.212021	0.212021	0.295197	0.229834	0.127679	0.065446	0.034671
68	99	0.211125	0.211125	0.296958	0.227512	0.125293	0.061669	0.032075
68	99	0.207021	0.207021	0.287252	0.223236	0.127419	0.066031	0.038172
68	99	0.20681	0.20681	0.292186	0.223283	0.123493	0.064283	0.036345
69	1	0.703952	0.703952	0.296048	0	0	0	0
69	3	0.00137498	0.001375	0.295474	0.341472	0.21604	0.097468	0.036981
69	15	0.00137646	0.001376	0.292361	0.335643	0.213055	0.102565	0.041989
69	15	0.00106709	0.001067	0.289554	0.333417	0.21651	0.101963	0.042883
69	31	0.0016451	0.001645	0.286024	0.331193	0.208904	0.102545	0.044173
69	63	0.00145912	0.001459	0.266017	0.312896	0.207897	0.112542	0.058413
69	99	0.00135439	0.001354	0.265425	0.312539	0.205818	0.112455	0.059126
69	99	0.00152341	0.001523	0.258504	0.301589	0.207698	0.121638	0.067109
70	0	0.00126478	0.001265	0.301389	0.348805	0.211437	0.096591	0.032003
70	0	0.00184912	0.001849	0.302375	0.350661	0.207816	0.096002	0.032775
70	1	0.00168151	0.001682	0.300196	0.35365	0.207506	0.096863	0.030983
70	1	0.00226089	0.002261	0.301597	0.351117	0.209373	0.095131	0.032187
70	3	0.00221445	0.002214	0.297154	0.350419	0.213031	0.093941	0.033343
70	15	0.00147896	0.001479	0.290833	0.326565	0.216829	0.098343	0.04307
70	15	0.00198601	0.001986	0.287841	0.345595	0.209697	0.095002	0.042907
70	31	0.0023694	0.002369	0.279211	0.335445	0.209948	0.099066	0.046217
70	63	0.00147372	0.001474	0.260765	0.319369	0.210661	0.10766	0.057861
70	63	0.0017021	0.001702	0.261293	0.313246	0.20603	0.112298	0.060689
70	99	0.00179748	0.001797	0.260842	0.306414	0.204167	0.107064	0.061366
70	99	0.00200297	0.002003	0.253356	0.296671	0.210253	0.113034	0.066409
71	0	1	1	0	0	0	0	0
71	0	0.16755	0.16755	0.211019	0.205621	0.140912	0.061434	0.132858
71	0	0.113629	0.113629	0.229753	0.198764	0.118127	0.092056	0.13819
71	3	1	1	0	0	0	0	0
71	6	0.120888	0.120888	0.162292	0.131435	0.109097	0.096939	0.132061
71	6	0.0854687	0.085469	0.227356	0.151749	0.119172	0.067954	0.152241
71	15	0.142015	0.142015	0.217923	0.188109	0.112274	0.097359	0.104245
71	31	0.0883594	0.088359	0.113679	0.050314	0.207013	0.119105	0.085085
71	63	0.119899	0.119899	0.159284	0.185171	0.192401	0.143198	0.049587
71	63	0.14601	0.14601	0.189065	0.179107	0.11404	0.087196	0.094909
71	99	0.174037	0.174037	0.164426	0.176744	0.117036	0.089254	0.085721
72	0	0.378626	0.378626	0.338031	0.183141	0.07234	0.022186	0.005677
72	0	0.376422	0.376422	0.332388	0.184315	0.074919	0.024712	0.007245
72	0	0.379408	0.379408	0.333527	0.185198	0.072147	0.023098	0.006622
72	1	0.378091	0.378091	0.33634	0.182322	0.072389	0.023899	0.006958
72	1	0.379986	0.379986	0.332592	0.183515	0.073711	0.023683	0.006514
72	1	0.374695	0.374695	0.340833	0.180433	0.073612	0.022616	0.007811
72	3	0.37245	0.37245	0.335007	0.179993	0.077838	0.028415	0.006295
72	3	0.368574	0.368574	0.34122	0.185238	0.074381	0.024246	0.006341
72	3	0.378735	0.378735	0.33232	0.182757	0.074024	0.025128	0.007036
72	6	0.377939	0.377939	0.333452	0.184764	0.072384	0.024125	0.007336
72	6	0.376648	0.376648	0.331366	0.184285	0.075573	0.024946	0.007182
72	6	0.374899	0.374899	0.336256	0.182495	0.072872	0.026417	0.007061
72	15	0.371304	0.371304	0.329093	0.187858	0.075952	0.02677	0.009024
72	15	0.362481	0.362481	0.330837	0.188441	0.079498	0.029816	0.008928
72	15	0.367329	0.367329	0.329615	0.184989	0.080116	0.028778	0.009173
72	31	0.362422	0.362422	0.327519	0.18827	0.08172	0.03075	0.009319
72	31	0.353668	0.353668	0.335352	0.1858	0.081707	0.032698	0.010776
72	63	0.352145	0.352145	0.319012	0.187249	0.087867	0.03912	0.014607
72	63	0.345018	0.345018	0.324618	0.190084	0.087656	0.03754	0.015084
72	63	0.341824	0.341824	0.328435	0.190421	0.089053	0.035577	0.01469
72	99	0.345351	0.345351	0.32345	0.188287	0.088944	0.038686	0.015281
72	99	0.344521	0.344521	0.316569	0.194022	0.090426	0.039327	0.015134
72	99	0.337038	0.337038	0.317851	0.188655	0.089962	0.039874	0.017993
73	0	0.413915	0.413915	0.338768	0.165692	0.075539	0.006086	0
73	1	0.391094	0.391094	0.335502	0.198814	0.055231	0.019359	0
73	1	0.362502	0.362502	0.34957	0.181493	0.072243	0.034192	0
73	3	0.348639	0.348639	0.352718	0.207278	0.061393	0.029973	0
73	3	0.363259	0.363259	0.359084	0.185227	0.077212	0.015217	0
73	6	0.369416	0.369416	0.327248	0.172716	0.081009	0.039502	0.010109
73	6	0.395721	0.395721	0.402251	0.121104	0.074356	0.006567	0
73	6	0.302834	0.302834	0.373552	0.231794	0.06085	0.022296	0.008675
73	15	0.32939	0.32939	0.33756	0.199799	0.080786	0.040688	0.011777
73	15	0.332068	0.332068	0.33476	0.18638	0.093415	0.04104	0.012336
73	15	0.344979	0.344979	0.322455	0.20516	0.08683	0.030792	0.009784
73	31	0.313202	0.313202	0.312184	0.221202	0.080733	0.040096	0.022016
73	31	0.283743	0.283743	0.291076	0.205999	0.119171	0.044741	0.032121
73	63	0.258957	0.258957	0.286593	0.200188	0.113605	0.059589	0.043194
73	63	0.27817	0.27817	0.259148	0.194556	0.12843	0.071255	0.041584
73	63	0.284183	0.284183	0.285854	0.189968	0.106139	0.066403	0.03865
73	99	0.26019	0.26019	0.276284	0.170857	0.116204	0.075021	0.046765
73	99	0.224478	0.224478	0.242177	0.197874	0.137434	0.089537	0.051699
73	99	0.255945	0.255945	0.279675	0.161986	0.122673	0.086096	0.055775
74	0	0.519378	0.519378	0.328336	0.116416	0.029333	0.006538	0
74	0	0.524663	0.524663	0.326819	0.11533	0.026997	0.006191	0
74	0	0.523051	0.523051	0.324872	0.115703	0.030565	0.005809	0
74	1	0.51804	0.51804	0.328796	0.117413	0.029242	0.006508	0
74	1	0.518191	0.518191	0.325931	0.119852	0.030318	0.005708	0
74	1	0.51478	0.51478	0.333518	0.113724	0.032152	0.005826	0
74	3	0.511826	0.511826	0.325409	0.125882	0.030379	0.006504	0
74	3	0.502843	0.502843	0.342737	0.115626	0.031087	0.007708	0
74	3	0.513379	0.513379	0.329375	0.120357	0.031538	0.005351	0
74	6	0.515599	0.515599	0.323405	0.120743	0.034759	0.005494	0
74	6	0.509296	0.509296	0.329194	0.122167	0.031934	0.007409	0
74	6	0.505929	0.505929	0.331285	0.124256	0.031553	0.006978	0
74	15	0.497922	0.497922	0.331003	0.125023	0.037033	0.009019	0
74	15	0.494349	0.494349	0.330923	0.131406	0.033155	0.010168	0
74	15	0.495479	0.495479	0.333687	0.126105	0.036873	0.007856	0
74	31	0.46943	0.46943	0.343057	0.133287	0.042373	0.011854	0
74	31	0.482734	0.482734	0.33746	0.129054	0.04083	0.009921	0
74	63	0.481724	0.481724	0.32878	0.133809	0.041927	0.01376	0
74	63	0.473404	0.473404	0.337333	0.136109	0.040879	0.012274	0
74	63	0.47483	0.47483	0.32977	0.141464	0.04259	0.011348	0
74	99	0.484329	0.484329	0.331201	0.126221	0.045688	0.012561	0
74	99	0.469533	0.469533	0.334054	0.139567	0.045438	0.011406	0
74	99	0.458076	0.458076	0.334135	0.137694	0.054143	0.015952	0
75	0	0.327721	0.327721	0.386072	0.196474	0.079395	0.010339	0
75	0	0.357662	0.357662	0.390343	0.216815	0.03518	0	0
75	0	0.348773	0.348773	0.367815	0.201594	0.076365	0.005453	0
75	1	0.353532	0.353532	0.337637	0.199606	0.094089	0.015136	0
75	3	0.336658	0.336658	0.393368	0.226435	0.043539	0	0
75	6	0.40235	0.40235	0.383524	0.212509	0.001617	0	0
75	6	0.31853	0.31853	0.378723	0.209848	0.066	0.026898	0
75	15	0.309446	0.309446	0.369639	0.228053	0.065484	0.027378	0
75	31	0.300377	0.300377	0.410671	0.209849	0.073882	0.005221	0
75	63	0.321496	0.321496	0.319274	0.19665	0.092891	0.054135	0.015554
75	63	0.327688	0.327688	0.362144	0.204557	0.080361	0.02525	0
75	99	0.298323	0.298323	0.358596	0.194435	0.11197	0.036675	0
75	99	0.282409	0.282409	0.271491	0.258182	0.112324	0.038569	0.032037
75	99	0.285882	0.285882	0.325098	0.186627	0.104712	0.062083	0.025675
76	0	0.45562	0.45562	0.315966	0.156806	0.060972	0.010636	0
76	0	0.465279	0.465279	0.323872	0.14299	0.05787	0.00999	0
76	0	0.44325	0.44325	0.304092	0.139392	0.046723	0.02295	0.034931
76	1	0.371528	0.371528	0.376206	0.149593	0.091347	0.011326	0
76	1	0.398108	0.398108	0.285057	0.182832	0.087475	0.021057	0.023992
76	1	0.361645	0.361645	0.317228	0.163124	0.073165	0.041336	0.034418
76	3	0.317076	0.317076	0.319902	0.190081	0.12237	0.038716	0.011854
76	3	0.363035	0.363035	0.321088	0.169323	0.107484	0.022129	0.016941
76	3	0.313738	0.313738	0.280783	0.150233	0.087648	0.039576	0.09165
76	6	0.360878	0.360878	0.292259	0.171106	0.132841	0.026559	0.016356
76	6	0.353746	0.353746	0.287329	0.189554	0.150242	0.018072	0.001056
76	6	0.366899	0.366899	0.306173	0.178106	0.112141	0.024908	0.011774
76	15	0.331246	0.331246	0.325055	0.201947	0.102168	0.027842	0.011742
76	15	0.294414	0.294414	0.301367	0.210437	0.129911	0.039677	0.022276
76	31	0.321958	0.321958	0.292887	0.161439	0.149828	0.032762	0.029684
76	63	0.319097	0.319097	0.296636	0.195596	0.106788	0.036262	0.037553
76	63	0.346861	0.346861	0.293394	0.18358	0.112483	0.033496	0.022248
76	99	0.317514	0.317514	0.329713	0.153643	0.097041	0.04401	0.042589
76	99	0.32253	0.32253	0.304627	0.140813	0.128375	0.034049	0.062788
76	99	0.31749	0.31749	0.322651	0.165622	0.110222	0.044575	0.034382
77	0	0.520552	0.520552	0.322322	0.120478	0.030428	0.006221	0
77	0	0.518558	0.518558	0.32621	0.117955	0.030556	0.006721	0
77	0	0.522529	0.522529	0.323236	0.116746	0.030858	0.006631	0
77	1	0.516311	0.516311	0.326404	0.118754	0.03226	0.006271	0
77	1	0.520328	0.520328	0.328257	0.114777	0.031292	0.005346	0
77	1	0.512235	0.512235	0.32982	0.12089	0.030778	0.006276	0
77	3	0.506327	0.506327	0.329878	0.122603	0.033548	0.007645	0
77	3	0.509928	0.509928	0.331086	0.117897	0.03382	0.007269	0
77	3	0.512619	0.512619	0.328888	0.119159	0.032061	0.007272	0
77	6	0.505525	0.505525	0.329838	0.122736	0.034605	0.007295	0
77	6	0.503041	0.503041	0.332672	0.126743	0.030854	0.00669	0
77	6	0.503483	0.503483	0.331704	0.123427	0.03422	0.007166	0
77	15	0.488771	0.488771	0.33357	0.129721	0.038444	0.009495	0
77	15	0.484763	0.484763	0.335421	0.130292	0.039433	0.010091	0
77	15	0.494774	0.494774	0.333038	0.127004	0.036289	0.008894	0
77	31	0.477989	0.477989	0.335037	0.135404	0.040772	0.010798	0
77	31	0.480915	0.480915	0.332155	0.134037	0.042427	0.010467	0
77	63	0.463707	0.463707	0.331214	0.141284	0.049409	0.014386	0
77	63	0.461623	0.461623	0.33202	0.142232	0.049229	0.014895	0
77	63	0.462783	0.462783	0.334235	0.143232	0.04606	0.013691	0
77	99	0.459238	0.459238	0.334203	0.143544	0.047584	0.015431	0
77	99	0.460709	0.460709	0.330229	0.143098	0.050832	0.015132	0
77	99	0.452122	0.452122	0.332623	0.145035	0.052501	0.017719	0
78	1	0.0957346	0.095735	0.87829	0.025975	0	0	0
78	1	0.427067	0.427067	0.343817	0.158061	0.055736	0.01532	0
78	3	0.417818	0.417818	0.349281	0.161553	0.056545	0.014804	0
78	3	0.418481	0.418481	0.348505	0.161325	0.055257	0.016432	0
78	31	0.278245	0.278245	0.22173	0.081892	0.029142	0.066276	0.06875
78	99	0.369649	0.369649	0.325709	0.172833	0.080044	0.034728	0.017038
79	0	0.370866	0.370866	0.342987	0.198876	0.07164	0.015631	0
79	0	0.37071	0.37071	0.369888	0.177687	0.061237	0.018882	0.001596
79	0	0.379272	0.379272	0.367192	0.193717	0.046475	0.013344	0
79	1	0.383342	0.383342	0.340517	0.20619	0.056662	0.013289	0
79	1	0.3925	0.3925	0.351356	0.169913	0.069344	0.016886	0
79	1	0.367932	0.367932	0.342418	0.183465	0.079147	0.027037	0
79	3	0.358112	0.358112	0.350664	0.190685	0.07762	0.022919	0
79	3	0.356447	0.356447	0.353673	0.19136	0.071756	0.02301	0.003754
79	3	0.354819	0.354819	0.355567	0.195654	0.069287	0.02348	0.001194
79	6	0.359412	0.359412	0.349461	0.180693	0.087144	0.02329	0
79	6	0.367111	0.367111	0.335941	0.185279	0.092938	0.01873	0
79	6	0.364153	0.364153	0.365045	0.185924	0.06375	0.021128	0
79	15	0.355345	0.355345	0.3506	0.188763	0.078015	0.019235	0.008042
79	15	0.347293	0.347293	0.340833	0.205029	0.07602	0.024945	0.005881
79	15	0.366092	0.366092	0.349257	0.202439	0.067404	0.014809	0
79	31	0.349135	0.349135	0.345572	0.188574	0.078983	0.035555	0.002181
79	31	0.373621	0.373621	0.309108	0.197219	0.076094	0.038626	0.005333
79	63	0.327964	0.327964	0.331893	0.190577	0.094464	0.043918	0.011184
79	63	0.336709	0.336709	0.316299	0.203692	0.083833	0.044003	0.015465
79	63	0.325659	0.325659	0.326028	0.191717	0.092884	0.043845	0.018096
79	99	0.339648	0.339648	0.337887	0.199797	0.075172	0.036545	0.010951
79	99	0.333154	0.333154	0.312418	0.193497	0.089658	0.042285	0.02306
79	99	0.329266	0.329266	0.326525	0.20002	0.082362	0.047092	0.014735
80	0	0.415927	0.415927	0.353195	0.162278	0.054939	0.013661	0
80	0	0.423193	0.423193	0.34791	0.162185	0.052481	0.014231	0
80	1	0.412079	0.412079	0.351608	0.167449	0.054176	0.014687	0
80	1	0.416483	0.416483	0.348042	0.167893	0.052119	0.015462	0
80	1	0.423128	0.423128	0.340716	0.160994	0.059381	0.015782	0
80	3	0.408778	0.408778	0.355297	0.161278	0.058299	0.016347	0
80	3	0.416366	0.416366	0.350923	0.160837	0.056411	0.015463	0
80	3	0.406474	0.406474	0.352183	0.16902	0.056451	0.015872	0
80	6	0.418738	0.418738	0.34829	0.16036	0.056092	0.01652	0
80	6	0.419436	0.419436	0.347668	0.163925	0.052957	0.016015	0
80	6	0.416914	0.416914	0.345596	0.164014	0.057501	0.015975	0
80	15	0.409995	0.409995	0.339634	0.164919	0.066929	0.018524	0
80	15	0.406529	0.406529	0.335763	0.165195	0.062024	0.021061	0.009429
80	15	0.408189	0.408189	0.340168	0.174445	0.058866	0.018331	0
80	31	0.397691	0.397691	0.335084	0.170461	0.06639	0.022465	0.007909
80	63	0.370417	0.370417	0.323095	0.175028	0.08164	0.034997	0.014823
80	63	0.372898	0.372898	0.322361	0.173961	0.077708	0.036334	0.016738
80	99	0.360703	0.360703	0.315095	0.170308	0.084565	0.038048	0.021112
80	99	0.365706	0.365706	0.316128	0.168329	0.081603	0.039556	0.019855
81	0	0.522109	0.522109	0.324058	0.115846	0.030803	0.007184	0
81	0	0.52281	0.52281	0.325525	0.114559	0.030099	0.007007	0
81	0	0.522415	0.522415	0.324742	0.115815	0.030454	0.006573	0
81	1	0.523729	0.523729	0.32499	0.114177	0.030355	0.006749	0
81	1	0.52773	0.52773	0.321941	0.113543	0.030642	0.006143	0
81	1	0.524588	0.524588	0.321969	0.114575	0.031388	0.00748	0
81	3	0.515827	0.515827	0.327094	0.118079	0.031891	0.007109	0
81	3	0.520986	0.520986	0.323637	0.11595	0.031982	0.007446	0
81	3	0.519604	0.519604	0.323653	0.118318	0.031261	0.007164	0
81	6	0.518232	0.518232	0.325547	0.118616	0.030824	0.006781	0
81	6	0.521705	0.521705	0.324232	0.115726	0.031144	0.007192	0
81	6	0.520031	0.520031	0.326467	0.1152	0.031529	0.006773	0
81	15	0.514486	0.514486	0.326923	0.117855	0.033086	0.007651	0
81	15	0.510115	0.510115	0.326721	0.120545	0.034118	0.0085	0
81	15	0.514318	0.514318	0.322947	0.121422	0.033541	0.007773	0
81	31	0.509877	0.509877	0.32408	0.120924	0.036415	0.008704	0
81	31	0.506799	0.506799	0.323313	0.123658	0.037042	0.009188	0
81	63	0.49401	0.49401	0.324572	0.130253	0.040192	0.010973	0
81	63	0.494301	0.494301	0.325575	0.128915	0.040528	0.010681	0
81	63	0.497302	0.497302	0.326051	0.126987	0.038804	0.010856	0
81	99	0.497802	0.497802	0.322725	0.128102	0.039992	0.011379	0
81	99	0.491748	0.491748	0.321845	0.131704	0.043135	0.011569	0
81	99	0.490082	0.490082	0.324479	0.129728	0.042762	0.012949	0
82	0	0.513275	0.513275	0.322311	0.121376	0.031676	0.011361	0
82	0	0.511069	0.511069	0.326135	0.118999	0.033419	0.010378	0
82	0	0.514373	0.514373	0.321624	0.119051	0.031976	0.012977	0
82	1	0.506609	0.506609	0.32665	0.121055	0.032819	0.012867	0
82	1	0.511435	0.511435	0.324793	0.120633	0.032748	0.010391	0
82	1	0.512271	0.512271	0.322813	0.121048	0.033628	0.01024	0
82	3	0.512068	0.512068	0.322054	0.120248	0.034213	0.011418	0
82	3	0.512235	0.512235	0.323577	0.119809	0.032674	0.011705	0
82	6	0.512117	0.512117	0.321021	0.121441	0.034338	0.011084	0
82	6	0.50728	0.50728	0.323774	0.122088	0.03422	0.012637	0
82	6	0.512335	0.512335	0.317848	0.122112	0.033029	0.014676	0
82	15	0.502653	0.502653	0.319751	0.125077	0.037193	0.015326	0
82	15	0.499333	0.499333	0.321841	0.124135	0.039486	0.015204	0
82	15	0.499064	0.499064	0.32355	0.122867	0.038856	0.015663	0
82	31	0.489929	0.489929	0.32417	0.127343	0.042314	0.016244	0
82	31	0.492562	0.492562	0.317686	0.127133	0.04312	0.019499	0
82	63	0.476276	0.476276	0.316794	0.133466	0.049995	0.02347	0
82	63	0.468337	0.468337	0.31339	0.133385	0.051219	0.023445	0.010225
82	63	0.474954	0.474954	0.3183	0.13442	0.049957	0.022369	0
82	99	0.479733	0.479733	0.315451	0.132256	0.049813	0.022748	0
82	99	0.46616	0.46616	0.310024	0.138852	0.049507	0.024623	0.010834
82	99	0.465295	0.465295	0.308127	0.135206	0.052228	0.026822	0.012322
83	0	0.427433	0.427433	0.348131	0.157134	0.05252	0.014782	0
83	0	0.422716	0.422716	0.346379	0.158648	0.056166	0.016091	0
83	0	0.42326	0.42326	0.346326	0.158928	0.05549	0.015996	0
83	1	0.423789	0.423789	0.3439	0.161597	0.055873	0.014841	0
83	1	0.422958	0.422958	0.346831	0.160133	0.056037	0.014041	0
83	1	0.427067	0.427067	0.343817	0.158061	0.055736	0.01532	0
83	3	0.419447	0.419447	0.342859	0.164064	0.056986	0.016645	0
83	3	0.417818	0.417818	0.349281	0.161553	0.056545	0.014804	0
83	3	0.418481	0.418481	0.348505	0.161325	0.055257	0.016432	0
83	6	0.42125	0.42125	0.34575	0.160644	0.056657	0.015699	0
83	6	0.421604	0.421604	0.344349	0.16139	0.056024	0.016633	0
83	6	0.419509	0.419509	0.343981	0.162995	0.057299	0.016215	0
83	15	0.408894	0.408894	0.345328	0.165213	0.061078	0.019486	0
83	15	0.405437	0.405437	0.340366	0.16391	0.061885	0.021304	0.007099
83	15	0.412658	0.412658	0.341128	0.16529	0.061045	0.019878	0
83	31	0.399152	0.399152	0.339096	0.165175	0.06547	0.022961	0.008147
83	31	0.397326	0.397326	0.336292	0.16532	0.066546	0.024793	0.009722
83	63	0.382994	0.382994	0.327618	0.169703	0.073701	0.031744	0.01424
83	63	0.382492	0.382492	0.327905	0.169823	0.074113	0.032095	0.013572
83	63	0.383196	0.383196	0.326505	0.170395	0.075481	0.030942	0.013481
83	99	0.384283	0.384283	0.322906	0.169951	0.073627	0.033038	0.016195
83	99	0.369649	0.369649	0.325709	0.172833	0.080044	0.034728	0.017038
83	99	0.368581	0.368581	0.324801	0.170957	0.079083	0.038362	0.018216
84	0	0.430114	0.430114	0.279344	0.185582	0.103067	0.001893	0
84	0	0.351551	0.351551	0.34616	0.186985	0.103517	0.011787	0
84	0	0.400633	0.400633	0.293716	0.180289	0.115217	0.010145	0
84	1	0.049259	0.049259	0.351582	0.327942	0.191807	0.06748	0.01193
84	1	0.358859	0.358859	0.340769	0.183548	0.092256	0.020703	0.003865
84	1	0.351587	0.351587	0.334824	0.183015	0.103249	0.024704	0.00262
84	3	0.0130057	0.013006	0.33429	0.324046	0.203473	0.081645	0.029566
84	3	0.351794	0.351794	0.317682	0.21543	0.081033	0.030377	0.003683
84	3	0.353569	0.353569	0.336701	0.180447	0.112297	0.016985	0
84	6	0.312163	0.312163	0.342373	0.207751	0.102419	0.024884	0.010409
84	6	0.341602	0.341602	0.343007	0.173093	0.108536	0.031878	0.001884
84	15	0.32582	0.32582	0.324116	0.177255	0.124445	0.042379	0.005985
84	15	0.287936	0.287936	0.347829	0.193793	0.10938	0.047703	0.013359
84	15	0.29488	0.29488	0.328868	0.192394	0.117064	0.04328	0.023624
84	31	0.324956	0.324956	0.292997	0.204282	0.117715	0.047398	0.012653
84	31	0.297804	0.297804	0.322108	0.189034	0.113268	0.045516	0.016718
84	63	0.253456	0.253456	0.276659	0.184754	0.129598	0.078679	0.031281
84	63	0.298497	0.298497	0.253744	0.168573	0.144772	0.065831	0.033618
84	63	0.279126	0.279126	0.264742	0.197358	0.129344	0.074542	0.044422
84	99	0.264494	0.264494	0.279153	0.191514	0.117064	0.071977	0.044933
84	99	0.247943	0.247943	0.242592	0.166618	0.154237	0.095757	0.047811
84	99	0.273284	0.273284	0.256998	0.201879	0.125827	0.065278	0.037055
85	0	0.378039	0.378039	0.335782	0.205832	0.067537	0.01281	0
85	3	0.341843	0.341843	0.343437	0.196488	0.078461	0.032364	0.007406
85	6	0.357611	0.357611	0.351485	0.196588	0.07027	0.021851	0.002195
85	6	0.359305	0.359305	0.347167	0.184712	0.076482	0.027225	0.005108
85	99	0.302835	0.302835	0.346511	0.206356	0.083144	0.045222	0.015932
86	0	0.615454	0.615454	0.290197	0.080634	0.013715	0	0
86	0	0.60685	0.60685	0.298036	0.079698	0.015416	0	0
86	0	0.608539	0.608539	0.296794	0.081081	0.013587	0	0
86	1	0.607756	0.607756	0.303101	0.077025	0.012118	0	0
86	1	0.610289	0.610289	0.279276	0.093791	0.016644	0	0
86	1	0.606205	0.606205	0.291265	0.085408	0.017123	0	0
86	15	0.595896	0.595896	0.303076	0.085691	0.015336	0	0
86	15	0.5919	0.5919	0.304067	0.086581	0.017452	0	0
86	15	0.583944	0.583944	0.302788	0.090915	0.022353	0	0
86	31	0.592388	0.592388	0.294187	0.090764	0.022661	0	0
86	31	0.597238	0.597238	0.282616	0.09586	0.024285	0	0
86	63	0.588493	0.588493	0.294778	0.092037	0.024692	0	0
86	63	0.575601	0.575601	0.297595	0.102605	0.0242	0	0
86	63	0.585858	0.585858	0.290687	0.096797	0.026659	0	0
87	0	0.386033	0.386033	0.33911	0.175828	0.075933	0.020479	0.002617
87	0	0.371439	0.371439	0.332659	0.192492	0.074327	0.024342	0.004741
87	1	0.383581	0.383581	0.336004	0.184642	0.069563	0.023364	0.002846
87	1	0.368222	0.368222	0.3477	0.185596	0.070272	0.024766	0.003446
87	15	0.367206	0.367206	0.329983	0.188987	0.078913	0.02809	0.006821
87	31	0.35832	0.35832	0.325627	0.188474	0.084243	0.034214	0.009121
87	99	0.0108335	0.010834	0.350428	0.32017	0.188497	0.088656	0.031214
87	99	0.345959	0.345959	0.317421	0.185677	0.088445	0.039374	0.017682
87	99	0.331159	0.331159	0.321665	0.186257	0.092621	0.041222	0.017839
88	0	0.416079	0.416079	0.34812	0.164207	0.056316	0.015278	0
88	6	0.406896	0.406896	0.35045	0.165729	0.058929	0.017996	0
88	6	0.413482	0.413482	0.335952	0.177401	0.055871	0.017294	0
88	15	0.388557	0.388557	0.348268	0.171682	0.064132	0.020312	0.007048
88	15	0.385064	0.385064	0.350577	0.169109	0.066849	0.021252	0.007147
88	15	0.385377	0.385377	0.344061	0.170894	0.072191	0.021758	0.005719
88	31	0.37514	0.37514	0.347892	0.175388	0.067164	0.026388	0.008028
88	63	0.372704	0.372704	0.33796	0.171616	0.075014	0.030949	0.011757
88	99	0.370265	0.370265	0.323146	0.180184	0.076502	0.033724	0.016179
88	99	0.377567	0.377567	0.323914	0.176183	0.080464	0.029313	0.012559
88	99	0.354919	0.354919	0.329398	0.180197	0.08343	0.035641	0.016414
89	0	0.265293	0.265293	0.361034	0.178795	0.076963	0.067991	0.036336
89	0	0.567199	0.567199	0.270015	0.147283	0.015504	0	0
89	1	0.429487	0.429487	0.351897	0.116012	0.102267	0.000338	0
89	1	0.199969	0.199969	0.213323	0.132966	0.105595	0.01262	0.03223
89	3	0.101348	0.101348	0.404329	0.33417	0.132365	0.025584	0.002204
89	31	0.436182	0.436182	0.325803	0.176021	0.055365	0.006629	0
89	31	0.187561	0.187561	0.230251	0.139705	0.062858	0.015901	0.021572
90	0	0.616413	0.616413	0.290894	0.080754	0.011939	0	0
90	0	0.613681	0.613681	0.291419	0.080881	0.01402	0	0
90	0	0.623254	0.623254	0.293486	0.075342	0.007918	0	0
90	1	0.624001	0.624001	0.282381	0.079531	0.014086	0	0
90	1	0.617486	0.617486	0.288518	0.080528	0.013468	0	0
90	1	0.614804	0.614804	0.285734	0.088495	0.010966	0	0
90	3	0.605375	0.605375	0.284861	0.093576	0.016188	0	0
90	3	0.609361	0.609361	0.292997	0.085976	0.011666	0	0
90	3	0.563967	0.563967	0.33281	0.091975	0.011248	0	0
90	6	0.60448	0.60448	0.292915	0.095843	0.006762	0	0
90	6	0.605185	0.605185	0.287876	0.093834	0.013104	0	0
90	6	0.615155	0.615155	0.280784	0.091658	0.012402	0	0
90	15	0.59379	0.59379	0.304185	0.095479	0.006546	0	0
90	15	0.59107	0.59107	0.305688	0.088792	0.014449	0	0
90	15	0.590309	0.590309	0.294616	0.101598	0.013477	0	0
90	31	0.597428	0.597428	0.301169	0.07994	0.021462	0	0
90	31	0.573834	0.573834	0.309874	0.098434	0.017859	0	0
90	63	0.572841	0.572841	0.302733	0.10219	0.022236	0	0
90	63	0.561851	0.561851	0.299532	0.111923	0.026694	0	0
90	63	0.572077	0.572077	0.292063	0.109763	0.026097	0	0
90	99	0.552783	0.552783	0.304376	0.115302	0.02754	0	0
90	99	0.564302	0.564302	0.298111	0.110894	0.026693	0	0
90	99	0.560608	0.560608	0.305512	0.109005	0.024874	0	0
91	0	0.353836	0.353836	0.344547	0.203337	0.084401	0.013879	0
91	0	0.385441	0.385441	0.415962	0.156998	0.041599	0	0
91	0	0.34695	0.34695	0.373738	0.191861	0.075429	0.012022	0
91	1	0.325522	0.325522	0.369045	0.182375	0.067344	0.042246	0.013469
91	3	0.341494	0.341494	0.36951	0.217828	0.061323	0.009846	0
91	6	0.359024	0.359024	0.391643	0.211908	0.030563	0.006862	0
91	15	0.335446	0.335446	0.412045	0.228878	0.022842	0.000789	0
91	31	0.347727	0.347727	0.372411	0.198052	0.070233	0.011577	0
91	63	0.316233	0.316233	0.337952	0.225243	0.095726	0.020752	0.004095
91	63	0.30611	0.30611	0.389173	0.178558	0.104548	0.021612	0
91	99	0.311117	0.311117	0.339337	0.211382	0.101543	0.020271	0.01635
91	99	0.314152	0.314152	0.322528	0.219296	0.10755	0.017463	0.019012
92	0	0.425599	0.425599	0.348585	0.163127	0.046903	0.015786	0
92	0	0.412267	0.412267	0.352237	0.162528	0.055715	0.017252	0
92	1	0.417026	0.417026	0.350384	0.169689	0.050114	0.012786	0
92	1	0.407538	0.407538	0.355151	0.159408	0.063874	0.014029	0
92	3	0.433344	0.433344	0.346233	0.149904	0.060182	0.010336	0
92	3	0.419886	0.419886	0.343008	0.168693	0.056073	0.01234	0
92	3	0.406069	0.406069	0.35394	0.166094	0.059467	0.01443	0
92	6	0.415545	0.415545	0.354028	0.154448	0.060969	0.01501	0
92	6	0.406329	0.406329	0.351007	0.168854	0.058019	0.01579	0
92	15	0.420369	0.420369	0.34413	0.16486	0.06072	0.009921	0
92	15	0.387554	0.387554	0.361264	0.16695	0.058922	0.019609	0.005701
92	15	0.395821	0.395821	0.352457	0.167231	0.071342	0.013149	0
92	31	0.413195	0.413195	0.342694	0.161776	0.058939	0.020805	0.002591
92	31	0.395652	0.395652	0.338364	0.177779	0.069272	0.018932	0
92	63	0.3845	0.3845	0.33559	0.182414	0.064226	0.025681	0.007588
92	63	0.363414	0.363414	0.348841	0.177062	0.073424	0.031309	0.00595
92	63	0.396816	0.396816	0.327147	0.171628	0.073198	0.021212	0.009999
92	99	0.391449	0.391449	0.330248	0.167022	0.069468	0.028974	0.012839
92	99	0.370033	0.370033	0.340324	0.175758	0.069157	0.03426	0.010468
92	99	0.368191	0.368191	0.328827	0.17577	0.07898	0.035412	0.01282
93	0	0.442349	0.442349	0.375572	0.147146	0.033898	0.001034	0
93	0	0.448003	0.448003	0.379656	0.141794	0.029824	0.000723	0
93	0	0.450792	0.450792	0.367401	0.139252	0.042491	6.5e-05	0
93	1	0.438702	0.438702	0.354159	0.153109	0.041118	0.012912	0
93	1	0.455572	0.455572	0.350357	0.160507	0.031283	0.002282	0
93	3	0.463399	0.463399	0.33921	0.164848	0.031915	0.000629	0
93	3	0.462743	0.462743	0.334994	0.14611	0.052783	0.00337	0
93	6	0.478502	0.478502	0.314876	0.173328	0.031109	0.002185	0
93	6	0.456134	0.456134	0.371	0.149269	0.023597	0	0
93	6	0.431819	0.431819	0.316944	0.193092	0.049289	0.008855	0
93	15	0.436546	0.436546	0.368946	0.136857	0.050913	0.006738	0
93	15	0.420604	0.420604	0.350167	0.166063	0.06325	-8.4e-05	0
93	15	0.475135	0.475135	0.324576	0.164877	0.032088	0.003324	0
93	31	0.453394	0.453394	0.317223	0.166979	0.056484	0.005921	0
93	31	0.378679	0.378679	0.364613	0.190754	0.058374	0.00758	0
93	63	0.400647	0.400647	0.329542	0.173299	0.087335	0.009178	0
93	63	0.37949	0.37949	0.335318	0.199225	0.071581	0.014386	0
93	63	0.412461	0.412461	0.303376	0.196075	0.075308	0.01278	0
93	99	0.364309	0.364309	0.366478	0.195278	0.06629	0.007644	0
93	99	0.330116	0.330116	0.297696	0.251165	0.089371	0.01994	0.011711
93	99	0.345554	0.345554	0.315291	0.257776	0.070459	0.010919	0
94	0	0.635755	0.635755	0.280418	0.070543	0.013284	0	0
94	0	0.639191	0.639191	0.276768	0.070611	0.01343	0	0
94	0	0.637415	0.637415	0.277577	0.07117	0.013838	0	0
94	1	0.636788	0.636788	0.277122	0.073268	0.012822	0	0
94	1	0.634001	0.634001	0.281599	0.071046	0.013354	0	0
94	1	0.636806	0.636806	0.278332	0.071397	0.013465	0	0
94	3	0.634256	0.634256	0.279134	0.072322	0.014288	0	0
94	6	0.630272	0.630272	0.283765	0.07255	0.013413	0	0
94	15	0.615048	0.615048	0.291373	0.07773	0.015848	0	0
94	15	0.612268	0.612268	0.290378	0.081302	0.016052	0	0
94	15	0.613088	0.613088	0.290059	0.080761	0.016093	0	0
94	31	0.598407	0.598407	0.296461	0.086797	0.018335	0	0
94	31	0.597738	0.597738	0.297972	0.086284	0.018006	0	0
95	0	0.602479	0.602479	0.287465	0.104263	0.005793	0	0
95	0	0.558798	0.558798	0.301069	0.114711	0.025421	0	0
95	0	0.593316	0.593316	0.280844	0.115572	0.010268	0	0
95	1	0.574167	0.574167	0.294772	0.127001	0.00406	0	0
95	1	0.558759	0.558759	0.315578	0.105357	0.020306	0	0
95	1	0.593778	0.593778	0.303036	0.093532	0.009654	0	0
95	3	0.602409	0.602409	0.284294	0.098753	0.014544	0	0
95	3	0.559369	0.559369	0.321546	0.094847	0.024239	0	0
95	3	0.544666	0.544666	0.32219	0.110216	0.022928	0	0
95	6	0.536051	0.536051	0.331251	0.122845	0.009852	0	0
95	6	0.582045	0.582045	0.287707	0.112987	0.01726	0	0
95	6	0.591888	0.591888	0.308599	0.092702	0.006811	0	0
95	15	0.546118	0.546118	0.317271	0.097433	0.036571	0.002607	0
95	15	0.530929	0.530929	0.321144	0.11437	0.03233	0.001228	0
95	15	0.540117	0.540117	0.279536	0.140166	0.03285	0.007331	0
95	31	0.525161	0.525161	0.302594	0.149584	0.022661	0	0
95	63	0.521012	0.521012	0.296176	0.122719	0.047645	0.012449	0
95	63	0.50225	0.50225	0.316002	0.140536	0.028297	0.012916	0
95	63	0.526994	0.526994	0.279588	0.128397	0.04351	0.021511	0
95	99	0.524547	0.524547	0.299513	0.127525	0.033648	0.014766	0
95	99	0.518471	0.518471	0.302913	0.127772	0.033082	0.017762	0
95	99	0.464802	0.464802	0.265209	0.169961	0.069251	0.025745	0.005033
96	0	0.444224	0.444224	0.341868	0.150983	0.049945	0.012982	0
96	0	0.442823	0.442823	0.340377	0.152675	0.050837	0.013288	0
96	0	0.444393	0.444393	0.339226	0.152641	0.049608	0.014131	0
96	1	0.44162	0.44162	0.340675	0.153658	0.05085	0.013198	0
96	1	0.439843	0.439843	0.342766	0.152782	0.05129	0.013319	0
96	1	0.440725	0.440725	0.34604	0.152084	0.048132	0.01302	0
96	3	0.436805	0.436805	0.344984	0.154025	0.051098	0.013088	0
96	3	0.445133	0.445133	0.339419	0.152206	0.049594	0.013647	0
96	3	0.438258	0.438258	0.344607	0.154707	0.049853	0.012575	0
96	6	0.442963	0.442963	0.340512	0.152884	0.051039	0.012602	0
96	6	0.440568	0.440568	0.342051	0.153367	0.051194	0.01282	0
96	6	0.44151	0.44151	0.340404	0.15299	0.051995	0.0131	0
96	15	0.438826	0.438826	0.338292	0.154517	0.053744	0.014621	0
96	15	0.433675	0.433675	0.339629	0.155627	0.054322	0.016747	0
96	15	0.43398	0.43398	0.340104	0.157691	0.052648	0.015577	0
96	31	0.432132	0.432132	0.341904	0.155375	0.054213	0.016377	0
96	31	0.428733	0.428733	0.339988	0.157123	0.056922	0.017234	0
96	63	0.412469	0.412469	0.332548	0.163788	0.061631	0.021898	0.007666
96	63	0.413363	0.413363	0.335305	0.160539	0.061758	0.021946	0.007089
96	63	0.419761	0.419761	0.338398	0.160134	0.061905	0.019802	0
96	99	0.419218	0.419218	0.333374	0.158599	0.059833	0.021466	0.00751
96	99	0.409858	0.409858	0.332194	0.163516	0.063374	0.023351	0.007708
96	99	0.417447	0.417447	0.327523	0.159037	0.064221	0.023228	0.008544
97	0	0.00183536	0.001835	0.309868	0.346349	0.20789	0.093068	0.032006
97	0	0.00224364	0.002244	0.309997	0.346455	0.207758	0.092971	0.031762
97	0	0.00171159	0.001712	0.307901	0.343772	0.211479	0.094153	0.032129
97	1	0.00188774	0.001888	0.309935	0.343151	0.210936	0.094035	0.031349
97	1	0.00189454	0.001895	0.312763	0.344687	0.20515	0.093848	0.032603
97	1	0.00225051	0.002251	0.307532	0.347431	0.209893	0.091913	0.032034
97	3	0.0023994	0.002399	0.301818	0.346637	0.211294	0.093206	0.034072
97	3	0.00229424	0.002294	0.301974	0.352731	0.210651	0.090571	0.031889
97	3	0.00230874	0.002309	0.296475	0.351897	0.216487	0.092992	0.030355
97	6	0.00139088	0.001391	0.296388	0.352998	0.216252	0.092047	0.031069
97	6	0.00169657	0.001697	0.297892	0.354044	0.214108	0.091045	0.031379
97	6	0.00131359	0.001314	0.296601	0.35335	0.216475	0.091643	0.031236
97	15	0.00148546	0.001485	0.292768	0.351704	0.21384	0.094213	0.03415
97	15	0.00157567	0.001576	0.293961	0.347366	0.212119	0.095182	0.036254
97	15	0.00150626	0.001506	0.305684	0.344993	0.208133	0.091677	0.035544
97	31	0.00135893	0.001359	0.297315	0.345384	0.210175	0.09487	0.037302
97	31	0.00160433	0.001604	0.295951	0.343132	0.210066	0.095297	0.038161
97	63	0.00130437	0.001304	0.283349	0.334352	0.207603	0.099348	0.0443
97	63	0.00395373	0.003954	0.298168	0.335233	0.206291	0.092381	0.039332
97	63	0.00133211	0.001332	0.287871	0.33766	0.209	0.097616	0.041299
97	99	0.00150916	0.001509	0.287317	0.346076	0.211838	0.096761	0.039328
97	99	0.00430622	0.004306	0.282847	0.347494	0.212928	0.099492	0.039076
97	99	0.00125879	0.001259	0.287077	0.332507	0.211512	0.09929	0.041918
98	0	0.226089	0.226089	0.328521	0.254307	0.119802	0.049343	0.021939
98	0	0.220215	0.220215	0.340204	0.26519	0.124277	0.043109	0.007006
98	0	0.234972	0.234972	0.341499	0.25206	0.112253	0.048337	0.010879
98	1	0.246187	0.246187	0.318643	0.232996	0.141845	0.050386	0.009944
98	1	0.223931	0.223931	0.338359	0.249127	0.133683	0.051463	0.003437
98	3	0.220868	0.220868	0.326788	0.267425	0.13168	0.048597	0.004642
98	3	0.243251	0.243251	0.351375	0.254342	0.115854	0.031733	0.003445
98	3	0.208436	0.208436	0.350998	0.235837	0.144888	0.057892	0.001949
98	6	0.210377	0.210377	0.35515	0.252346	0.115646	0.060312	0.006169
98	6	0.219043	0.219043	0.334328	0.270086	0.119949	0.044506	0.012089
98	6	0.229831	0.229831	0.301069	0.254834	0.132023	0.059455	0.018841
98	15	0.218682	0.218682	0.336304	0.233258	0.136138	0.055704	0.01727
98	31	0.233097	0.233097	0.33554	0.227197	0.132377	0.060253	0.011537
98	63	0.209497	0.209497	0.305729	0.239519	0.135513	0.060848	0.026081
98	63	0.196132	0.196132	0.303977	0.236116	0.1283	0.065956	0.038901
98	63	0.222374	0.222374	0.300815	0.221014	0.131955	0.070694	0.042065
98	99	0.199076	0.199076	0.301866	0.236742	0.131113	0.067997	0.034257
99	6	0.0321609	0.032161	0.270718	0.325904	0.216765	0.104791	0.038475
99	15	0.262436	0.262436	0.326558	0.240147	0.117331	0.041574	0.011954
99	15	0.0332177	0.033218	0.275185	0.318563	0.210145	0.106215	0.041314
99	31	0.0366343	0.036634	0.253528	0.346958	0.218015	0.091472	0.043267
99	63	0.0424068	0.042407	0.264167	0.32696	0.202416	0.104538	0.049106
100	0	0.570324	0.570324	0.289383	0.125383	0.014911	0	0
100	0	0.488009	0.488009	0.310443	0.183576	0.017971	0	0
100	0	0.468501	0.468501	0.27196	0.228212	0.025603	0.005725	0
100	1	0.412158	0.412158	0.215246	0.361045	0.011551	0	0
100	3	0.536018	0.536018	0.303446	0.145403	0.015133	0	0
100	3	0.530052	0.530052	0.304507	0.165441	0	0	0
100	6	0.529122	0.529122	0.299533	0.159205	0.012141	0	0
100	6	0.548313	0.548313	0.317317	0.112424	0.021946	0	0
100	15	0.449805	0.449805	0.309109	0.223488	0.017598	0	0
100	15	0.49035	0.49035	0.291127	0.211502	0.007021	0	0
101	0	0.42257	0.42257	0.348579	0.160179	0.053791	0.014882	0
101	0	0.43193	0.43193	0.346167	0.159979	0.048162	0.013763	0
101	0	0.428196	0.428196	0.349636	0.159705	0.049327	0.013136	0
101	1	0.419644	0.419644	0.349605	0.159371	0.059088	0.012293	0
101	1	0.417262	0.417262	0.353285	0.161742	0.050375	0.017337	0
101	1	0.430449	0.430449	0.346331	0.155725	0.050173	0.017322	0
101	3	0.41986	0.41986	0.348064	0.166317	0.050796	0.014964	0
101	3	0.424726	0.424726	0.349654	0.161481	0.049402	0.014737	0
101	3	0.434903	0.434903	0.343725	0.148583	0.055442	0.017346	0
101	6	0.428428	0.428428	0.351951	0.158492	0.048224	0.012904	0
101	6	0.4274	0.4274	0.346751	0.162551	0.051576	0.011722	0
101	6	0.420232	0.420232	0.351566	0.165118	0.047382	0.015702	0
101	15	0.428469	0.428469	0.34507	0.163623	0.050533	0.012304	0
101	15	0.410374	0.410374	0.347877	0.164912	0.058977	0.01786	0
101	15	0.428968	0.428968	0.334326	0.165676	0.058302	0.012727	0
101	31	0.426124	0.426124	0.340737	0.165318	0.050431	0.017389	0
101	31	0.422393	0.422393	0.331401	0.167294	0.062949	0.015963	0
101	63	0.410287	0.410287	0.337971	0.158135	0.060073	0.024446	0.009088
101	63	0.402059	0.402059	0.352994	0.159785	0.05434	0.022306	0.008515
101	63	0.417773	0.417773	0.328414	0.172775	0.061148	0.01989	0
101	99	0.405691	0.405691	0.337894	0.164192	0.058297	0.024684	0.009242
101	99	0.411972	0.411972	0.330944	0.164378	0.060962	0.025243	0.006501
101	99	0.395679	0.395679	0.340852	0.163165	0.062881	0.02585	0.011573
102	0	0.582775	0.582775	0.289571	0.101918	0.025736	0	0
102	0	0.585286	0.585286	0.288261	0.100703	0.02575	0	0
102	0	0.587315	0.587315	0.285888	0.100756	0.026042	0	0
102	1	0.587258	0.587258	0.287553	0.099362	0.025826	0	0
102	1	0.582796	0.582796	0.289131	0.101758	0.026315	0	0
102	1	0.585021	0.585021	0.290346	0.098015	0.026618	0	0
102	3	0.584012	0.584012	0.287522	0.101797	0.026669	0	0
102	3	0.584219	0.584219	0.286962	0.101677	0.027142	0	0
102	3	0.58433	0.58433	0.290347	0.099637	0.025686	0	0
102	6	0.584026	0.584026	0.288752	0.09973	0.027492	0	0
102	6	0.582849	0.582849	0.287881	0.102887	0.026383	0	0
102	6	0.583032	0.583032	0.28857	0.101628	0.02677	0	0
102	15	0.580412	0.580412	0.291796	0.100515	0.027277	0	0
102	15	0.578666	0.578666	0.29082	0.103548	0.026965	0	0
102	15	0.576956	0.576956	0.292562	0.102598	0.027884	0	0
102	31	0.577134	0.577134	0.292162	0.104452	0.026252	0	0
102	31	0.576054	0.576054	0.291268	0.104102	0.028576	0	0
102	63	0.0486632	0.048663	0.436699	0.289157	0.136533	0.067916	0.021032
102	63	0.559409	0.559409	0.294035	0.109304	0.029713	0.007538	0
102	63	0.562825	0.562825	0.293587	0.108599	0.028204	0.006784	0
102	99	0.559202	0.559202	0.295295	0.108655	0.030332	0.006515	0
102	99	0.555742	0.555742	0.297262	0.109052	0.030544	0.0074	0
102	99	0.55382	0.55382	0.293145	0.113647	0.031402	0.007986	0
103	0	0.0799376	0.079938	0.107444	0.108142	0.066551	0.185274	0.175927
103	0	0.106481	0.106481	0.173296	0.140755	0.081806	0.128558	0.146847
103	0	0.0901729	0.090173	0.135781	0.11296	0.060083	0.141323	0.17863
103	1	0.00214785	0.002148	0.197893	0.304921	0.230494	0.147623	0.076804
103	1	0.0801715	0.080171	0.131781	0.105672	0.058744	0.140609	0.192354
103	1	0.0986547	0.098655	0.139867	0.123493	0.07084	0.150065	0.167574
103	3	0.0410129	0.041013	0.058062	0.057754	0.036321	0.158033	0.232884
103	3	0.0928895	0.092889	0.133221	0.119501	0.07062	0.156035	0.16137
103	6	0.0782271	0.078227	0.116072	0.105371	0.061516	0.132192	0.183393
103	6	0.00261617	0.002616	0.197867	0.267487	0.205085	0.150835	0.084697
103	6	0.0718481	0.071848	0.117737	0.095264	0.059778	0.14225	0.201373
103	15	0.0997997	0.0998	0.150254	0.121883	0.082408	0.125105	0.153805
103	15	0.00633775	0.006338	0.001747	0.163261	0.264498	0.233135	0.152329
103	31	0.0129911	0.012991	0.023583	0.148867	0.264399	0.225349	0.114793
103	63	0.0353695	0.035369	0.160272	0.23405	0.190662	0.169482	0.084574
103	99	0.0552449	0.055245	0.092105	0.230131	0.230954	0.170952	0.099367
103	99	0.0401954	0.040195	0.181555	0.207564	0.155018	0.218548	0.149144
104	0	0.386033	0.386033	0.33911	0.175828	0.075933	0.020479	0.002617
104	0	0.371439	0.371439	0.332659	0.192492	0.074327	0.024342	0.004741
104	0	0.379547	0.379547	0.335351	0.187486	0.070606	0.022338	0.004671
104	1	0.383581	0.383581	0.336004	0.184642	0.069563	0.023364	0.002846
104	1	0.368222	0.368222	0.3477	0.185596	0.070272	0.024766	0.003446
104	1	0.389721	0.389721	0.32254	0.185153	0.078065	0.023416	0.001105
104	3	0.367367	0.367367	0.335423	0.189798	0.075067	0.028989	0.003356
104	3	0.380316	0.380316	0.33024	0.191807	0.07311	0.020777	0.003751
104	3	0.383352	0.383352	0.337005	0.178696	0.072664	0.024034	0.004248
104	6	0.37233	0.37233	0.334587	0.178291	0.083456	0.025151	0.006184
104	6	0.367114	0.367114	0.329491	0.201021	0.072812	0.025064	0.004496
104	6	0.365571	0.365571	0.3454	0.187673	0.073741	0.024479	0.003136
104	15	0.367206	0.367206	0.329983	0.188987	0.078913	0.02809	0.006821
104	15	0.363785	0.363785	0.33917	0.178923	0.086536	0.02681	0.004775
104	15	0.361126	0.361126	0.329425	0.186022	0.079637	0.032096	0.011695
104	31	0.35832	0.35832	0.325627	0.188474	0.084243	0.034214	0.009121
104	31	0.35828	0.35828	0.337257	0.184557	0.077118	0.032502	0.010286
104	63	0.350434	0.350434	0.321934	0.185985	0.087265	0.038233	0.016147
104	63	0.356671	0.356671	0.324073	0.187225	0.082427	0.034649	0.014955
104	63	0.343244	0.343244	0.334479	0.187234	0.085833	0.035139	0.014071
104	99	0.341232	0.341232	0.326945	0.19035	0.091745	0.036261	0.013468
104	99	0.0126566	0.012657	0.355947	0.319611	0.180973	0.087075	0.035576
104	99	0.327467	0.327467	0.405463	0.196933	0.051647	0.018491	0
105	0	0.522437	0.522437	0.339583	0.108207	0.027605	0.002167	0
105	0	0.518983	0.518983	0.336739	0.114245	0.026288	0.003745	0
105	0	0.528924	0.528924	0.316776	0.11667	0.032513	0.005117	0
105	1	0.530581	0.530581	0.32291	0.112754	0.029069	0.004687	0
105	1	0.518544	0.518544	0.333864	0.111883	0.030775	0.004934	0
105	1	0.5435	0.5435	0.317404	0.117075	0.022021	0	0
105	3	0.499606	0.499606	0.343616	0.117366	0.031086	0.008326	0
105	3	0.515535	0.515535	0.340419	0.115989	0.025794	0.002263	0
105	3	0.531135	0.531135	0.31066	0.131911	0.026295	0	0
105	15	0.498558	0.498558	0.331156	0.126731	0.035859	0.007696	0
105	15	0.47416	0.47416	0.347778	0.134678	0.037511	0.005873	0
105	15	0.483268	0.483268	0.33688	0.137563	0.035168	0.007122	0
105	31	0.459011	0.459011	0.353658	0.136691	0.043059	0.007582	0
105	31	0.46836	0.46836	0.346456	0.136124	0.042095	0.006966	0
105	63	0.472322	0.472322	0.341188	0.131684	0.043924	0.010881	0
105	63	0.469807	0.469807	0.344688	0.130926	0.043431	0.011149	0
105	63	0.469742	0.469742	0.349821	0.125112	0.044906	0.01042	0
105	99	0.455184	0.455184	0.34539	0.13544	0.050004	0.013982	0
105	99	0.461107	0.461107	0.343856	0.133057	0.050153	0.011827	0
105	99	0.456678	0.456678	0.342179	0.137473	0.049658	0.014013	0
106	0	0.450023	0.450023	0.348184	0.145645	0.047284	0.008864	0
106	0	0.438059	0.438059	0.353058	0.152701	0.047679	0.008503	0
106	0	0.435715	0.435715	0.356993	0.151995	0.04472	0.010577	0
106	1	0.448705	0.448705	0.341683	0.150879	0.047858	0.010875	0
106	1	0.440401	0.440401	0.345415	0.154108	0.051241	0.008835	0
106	1	0.436916	0.436916	0.344763	0.157786	0.047884	0.012651	0
106	3	0.4424	0.4424	0.34408	0.154174	0.046002	0.013344	0
106	3	0.443228	0.443228	0.351449	0.139775	0.051315	0.014233	0
106	3	0.427129	0.427129	0.340828	0.166043	0.053456	0.012544	0
106	6	0.426248	0.426248	0.35552	0.153229	0.050915	0.014088	0
106	6	0.457358	0.457358	0.340841	0.14707	0.043216	0.011515	0
106	6	0.435722	0.435722	0.347738	0.153674	0.050585	0.012282	0
106	15	0.442366	0.442366	0.350162	0.149022	0.045453	0.012997	0
106	15	0.433157	0.433157	0.346865	0.152989	0.053285	0.013704	0
106	15	0.443632	0.443632	0.343684	0.150108	0.047561	0.015015	0
106	31	0.433267	0.433267	0.332701	0.156766	0.060592	0.016674	0
106	31	0.428667	0.428667	0.347558	0.151016	0.057243	0.015517	0
106	63	0.419209	0.419209	0.335657	0.157651	0.059251	0.021588	0.006645
106	63	0.399718	0.399718	0.359693	0.150345	0.065956	0.020577	0.003711
106	63	0.409672	0.409672	0.347043	0.166683	0.059845	0.016757	0
106	99	0.42233	0.42233	0.336266	0.151521	0.061418	0.021208	0.007256
106	99	0.414615	0.414615	0.333077	0.161844	0.061736	0.02134	0.007388
106	99	0.401197	0.401197	0.341768	0.163691	0.059529	0.026572	0.007244
107	0	0.503648	0.503648	0.314559	0.129962	0.041566	0.010265	0
107	0	0.503864	0.503864	0.317701	0.128843	0.038363	0.011228	0
107	1	0.506581	0.506581	0.311547	0.132088	0.039733	0.010051	0
107	1	0.51039	0.51039	0.316237	0.125159	0.038873	0.009342	0
107	3	0.480124	0.480124	0.296019	0.147764	0.058598	0.017494	0
107	3	0.504841	0.504841	0.310027	0.133393	0.040721	0.011018	0
107	3	0.51023	0.51023	0.309759	0.129683	0.040432	0.009896	0
107	6	0.505329	0.505329	0.312379	0.13024	0.04143	0.010622	0
107	6	0.483506	0.483506	0.299616	0.148894	0.053125	0.01486	0
107	15	0.485927	0.485927	0.309305	0.143493	0.047625	0.013649	0
107	15	0.493759	0.493759	0.30971	0.137513	0.046482	0.012536	0
107	31	0.480834	0.480834	0.310112	0.143847	0.050455	0.014752	0
107	31	0.483862	0.483862	0.316222	0.139739	0.047924	0.012253	0
[truncated: 7,749 more rows]
